# Supplementary material for: Oxidative stress rapidly stabilizes promoter-proximal paused Pol II across the human genome
Source: Oxford University Press journal article supplement (doi:10.1093/nar/gkx724), 2017-08-09
Supplement: gkx724_supp.zip [file gkx724_supp.zip]

Archive with 3 entries (3 files):
- nar-01907-v-2017-File009.pdf
- nar-01907-v-2017-File010.pdf
- nar-01907-v-2017-File011.xlsx
