# Supplementary material for: Oxidative stress rapidly stabilizes promoter-proximal paused Pol II across the human genome
Source: Oxford University Press journal article supplement (doi:10.1093/nar/gkx724), 2017-08-09
Supplement: gkx724_supp.zip [file gkx724_supp.zip › nar-01907-v-2017-File009.pdf]

## Pol II Transcripts

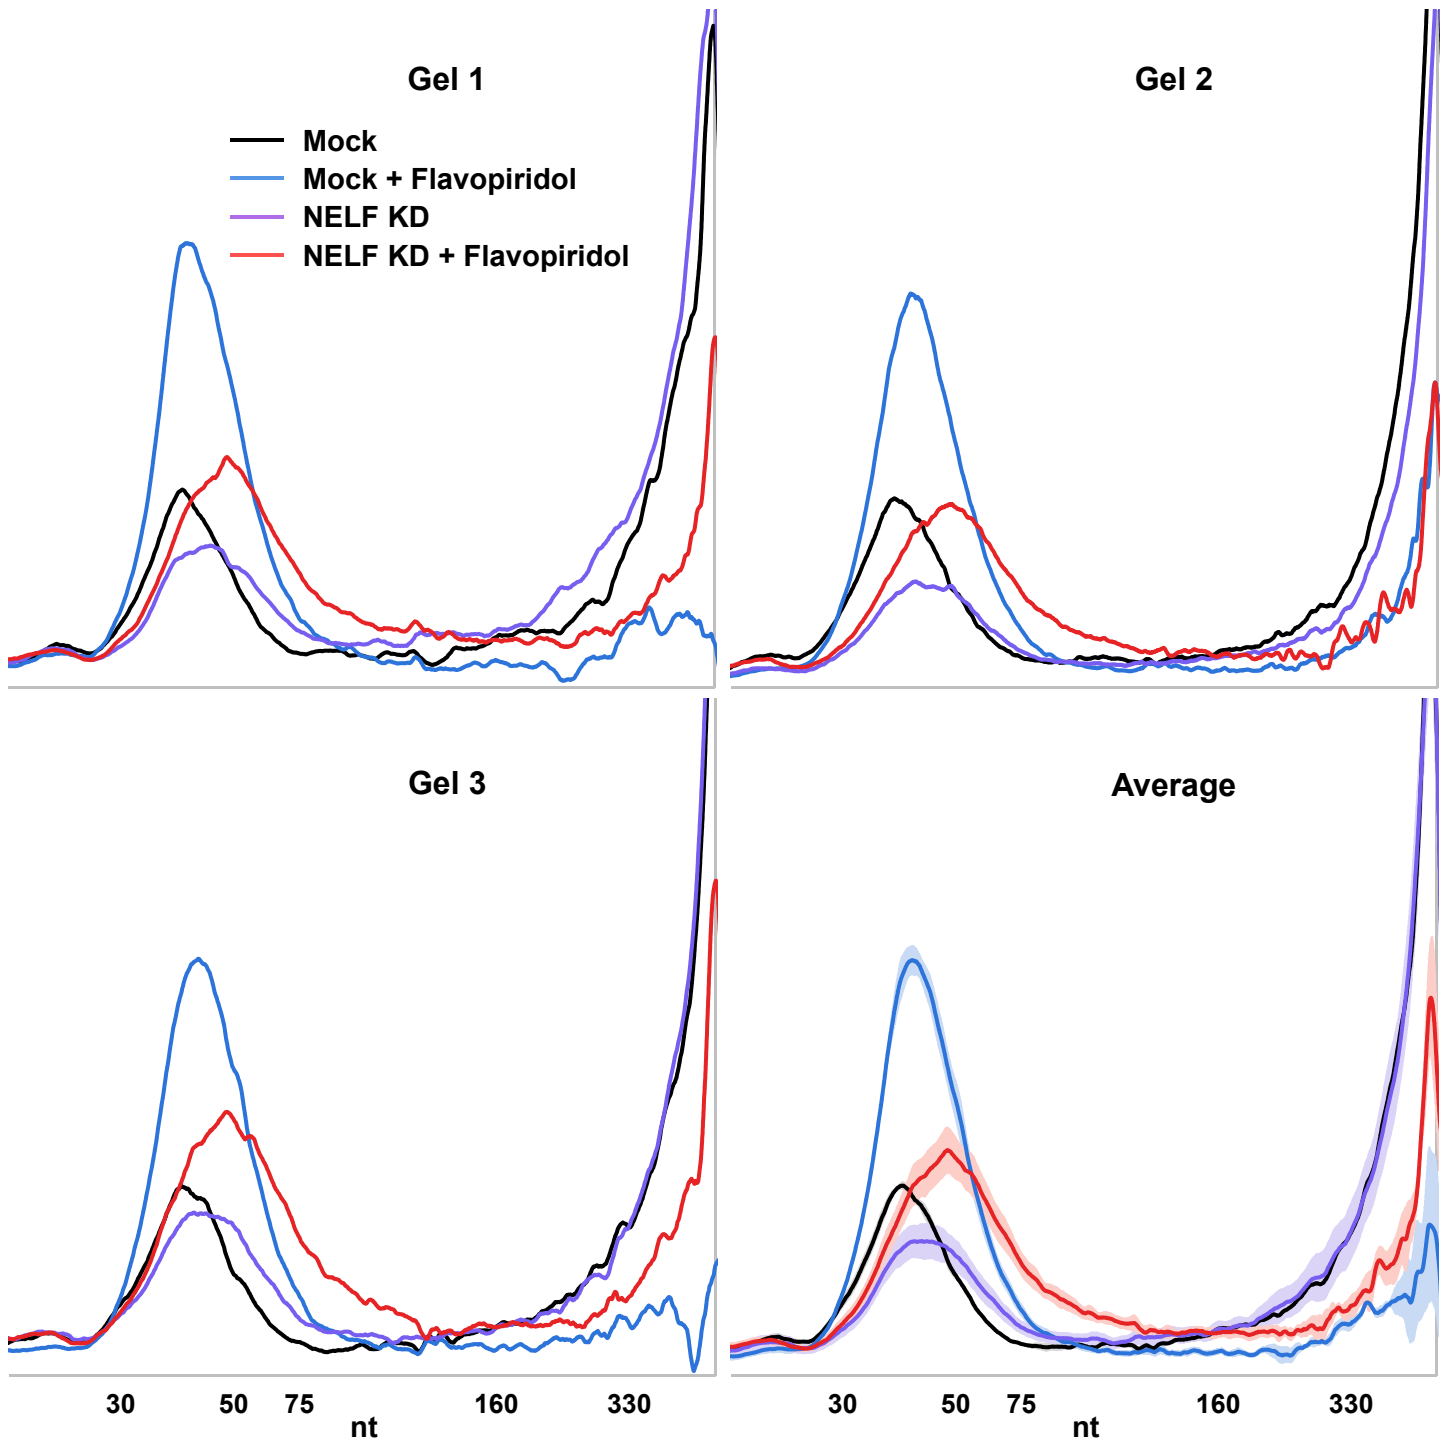

**Figure S1. Reproducibility of the nuclear walk-on assay, related to Figure 1.**

Adherent HeLa cells were transfected with 1.5 nM NELF-A siRNA (NELF KD) or lipid reagent only (Mock) for 48 h. Cells were treated with 0.1% DMSO or 1  $\mu$ M flavopiridol 1 h prior to isolation of nuclei. Nuclear walk-ons were performed in triplicate using a 6 min  $\alpha$ -<sup>32</sup>P-CTP pulse  $\pm$  2  $\mu$ g/ml  $\alpha$ -amanitin. Pol II nascent transcript profiles were normalized to the area under the Mock curve in each gel and a 50 nt  $\alpha$ -amanitin peak was used to adjust x-axes across all three gels. These triplicate profiles were then averaged and the standard error of the mean was plotted for all points. All plots have the same vertical scale.

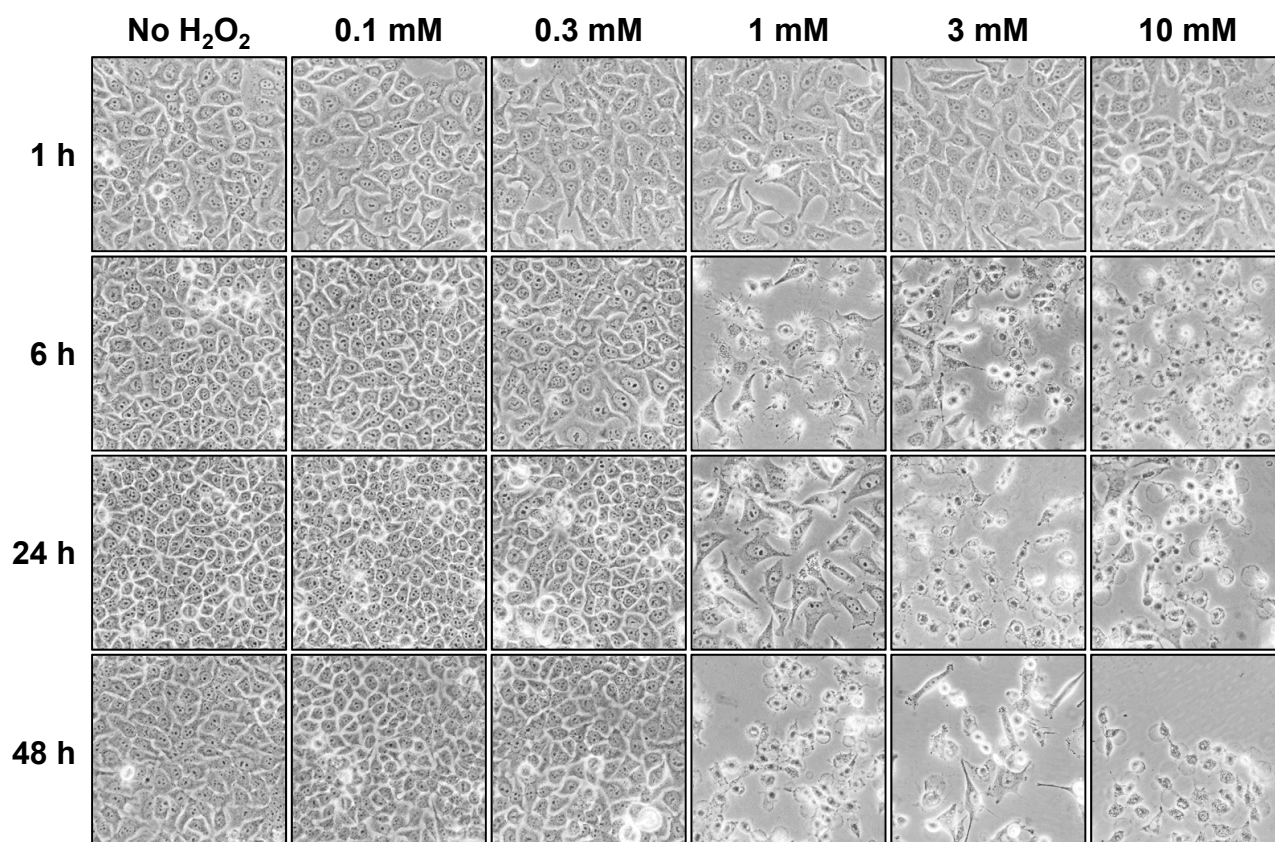

**Figure S2. The effects of increasing  $\text{H}_2\text{O}_2$  on adherent HeLa cell morphology, related to Figure 2.** Adherent HeLa cells were seeded in 6-well plates and were treated at 80% confluency with indicated concentrations of  $\text{H}_2\text{O}_2$ . Cells were monitored using phase-contrast microscopy and images were captured at indicated times.

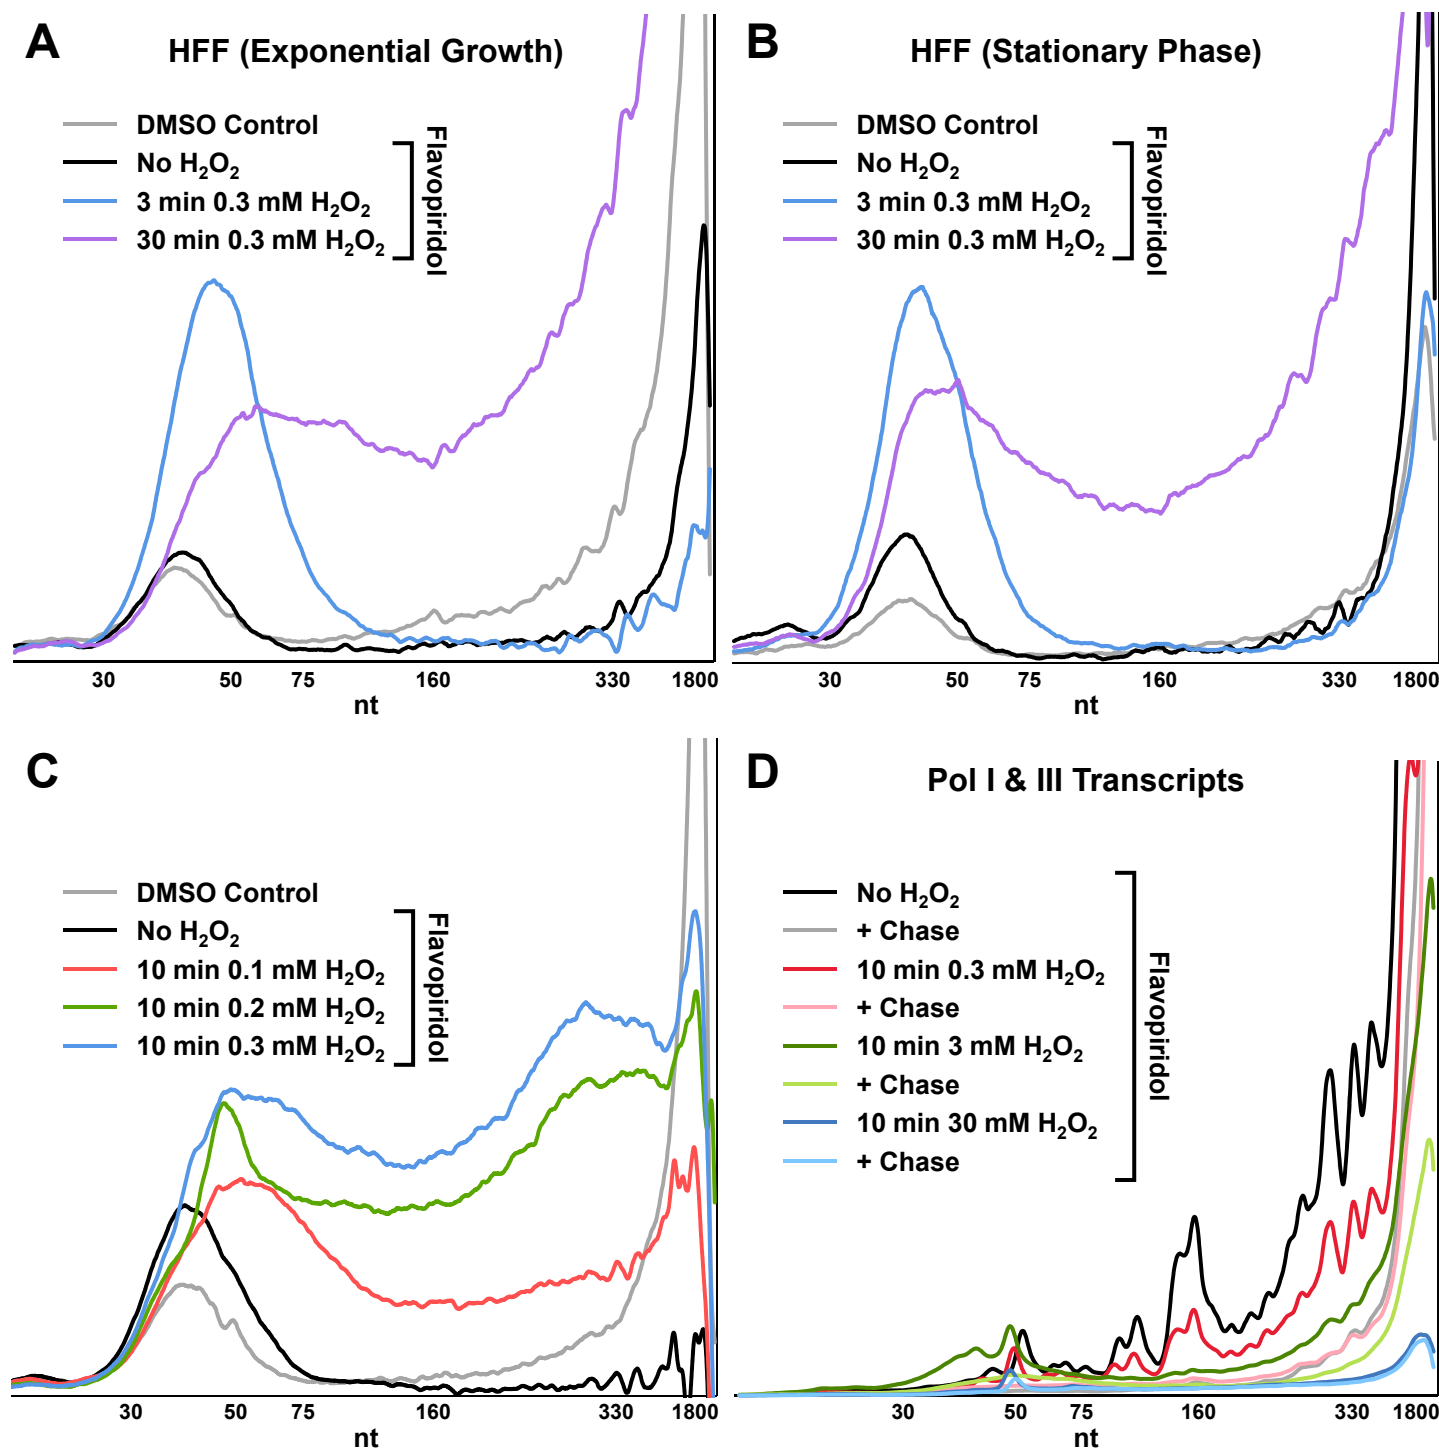

**Figure S3. Additional effects of  $H_2O_2$  on transcription, related to Figure 2.**

(A) Amanitin-sensitive Pol II nascent transcript profiles from a nuclear walk-on using nuclei from 80% confluent, exponentially growing human foreskin fibroblasts (HFF) treated 1 h with 0.1% DMSO or 1  $\mu$ M flavopiridol, with 0.3 mM  $H_2O_2$  for the last 3 or 30 min.

(B) The experiment in (A), except HFF were grown at 100% confluency for 2 weeks prior to treatment.

(C) Amanitin-sensitive Pol II nascent transcript profiles from a nuclear walk-on using nuclei from adherent HeLa cells treated 1 h with 0.1% DMSO or 1  $\mu$ M flavopiridol, with the indicated  $H_2O_2$  for the last 10 min.

(D) Amanitin-insensitive Pol I and III nascent transcript profiles from a nuclear walk-on using nuclei from adherent HeLa cells treated 1 h with 1  $\mu$ M flavopiridol. 0.3 mM, 3 mM, or 30 mM  $H_2O_2$  was added during the last 10 min of flavopiridol treatment. After a 5 min  $\alpha$ - $^{32}P$ -CTP pulse, reactions were chased as indicated for 10 min with 500  $\mu$ M cold ATP, UTP, GTP, and CTP.

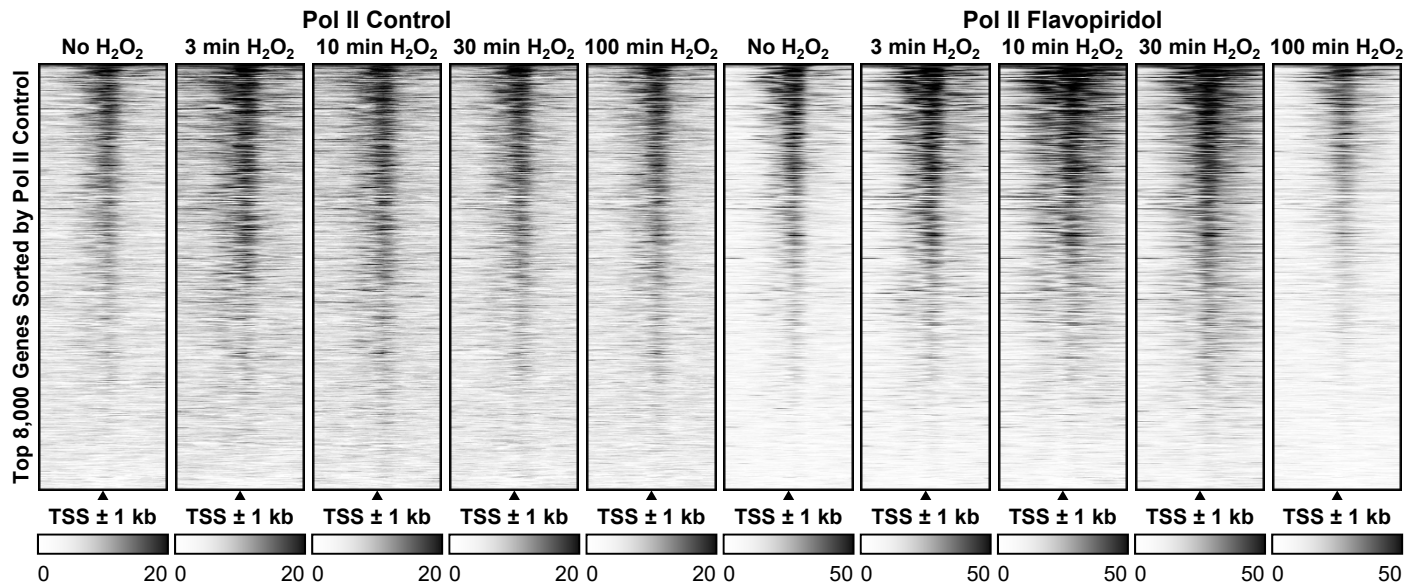

**Figure S4. Heatmaps at top Pol II occupancy promoters after  $H_2O_2$ , related to Figure 3.**

Pol II ChIP-Seq occupancies  $\pm$  1 kb around the top 8,000 EPDnew TSS with the highest median Pol II signal. Signals were depth-adjusted using the average number of mapped sequence reads in all ten samples. The heatmaps were sorted by TSS with decreasing Pol II occupancy in the no  $H_2O_2$  control.

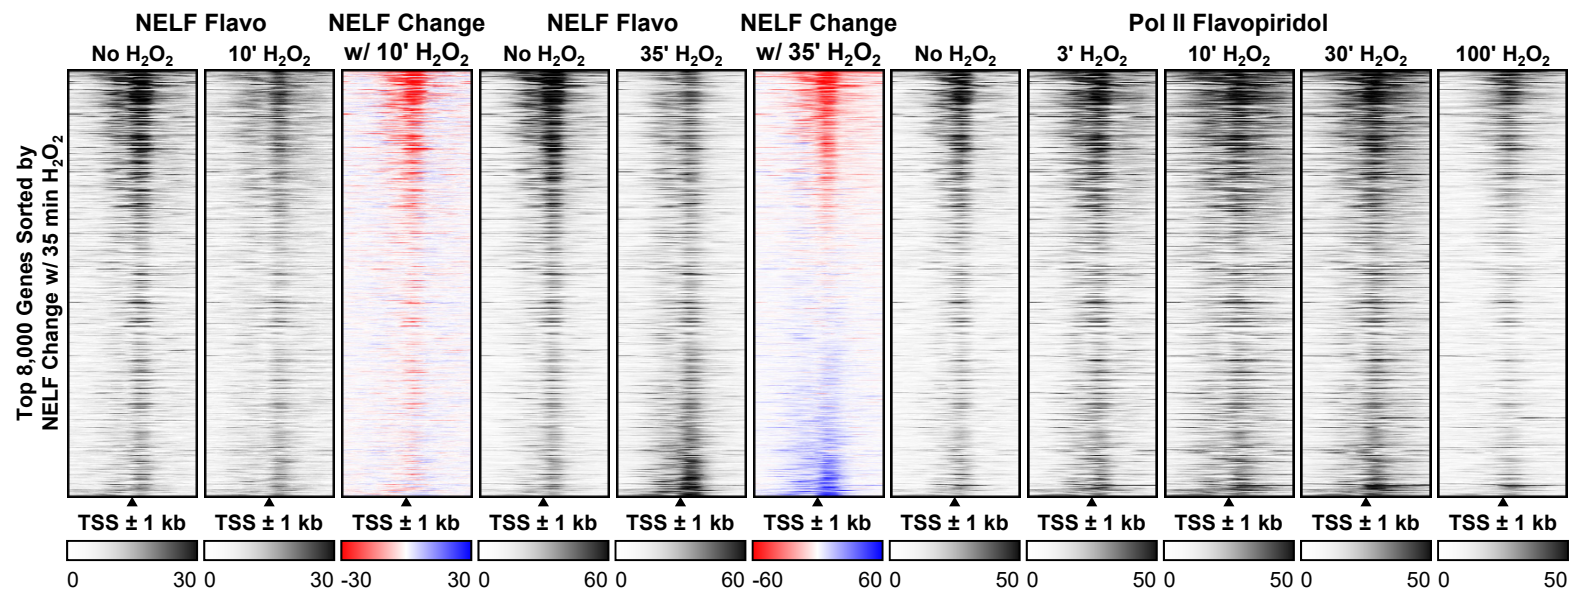

**Figure S5. NELF is selectively lost from creeping elongation complexes over time after  $H_2O_2$ , related to Figure 4.** Pol II and NELF ChIP-Seq occupancies  $\pm$  1 kb around the top 8,000 EPDnew TSS with the highest median Pol II signal. The heatmaps were sorted by the change in median NELF occupancy after 35 min 0.3 mM  $H_2O_2$  treatment. Data is from three ChIP-Seq experiments: NELF Flavo  $\pm$  10 min  $H_2O_2$ , NELF Flavo  $\pm$  35 min  $H_2O_2$ , and the Pol II Flavopiridol  $H_2O_2$  time course. Signals within each ChIP-Seq experiment were depth-adjusted using the average number of mapped sequence reads to enable occupancy comparisons within each experiment. Occupancy comparisons of samples between experiments are not valid.

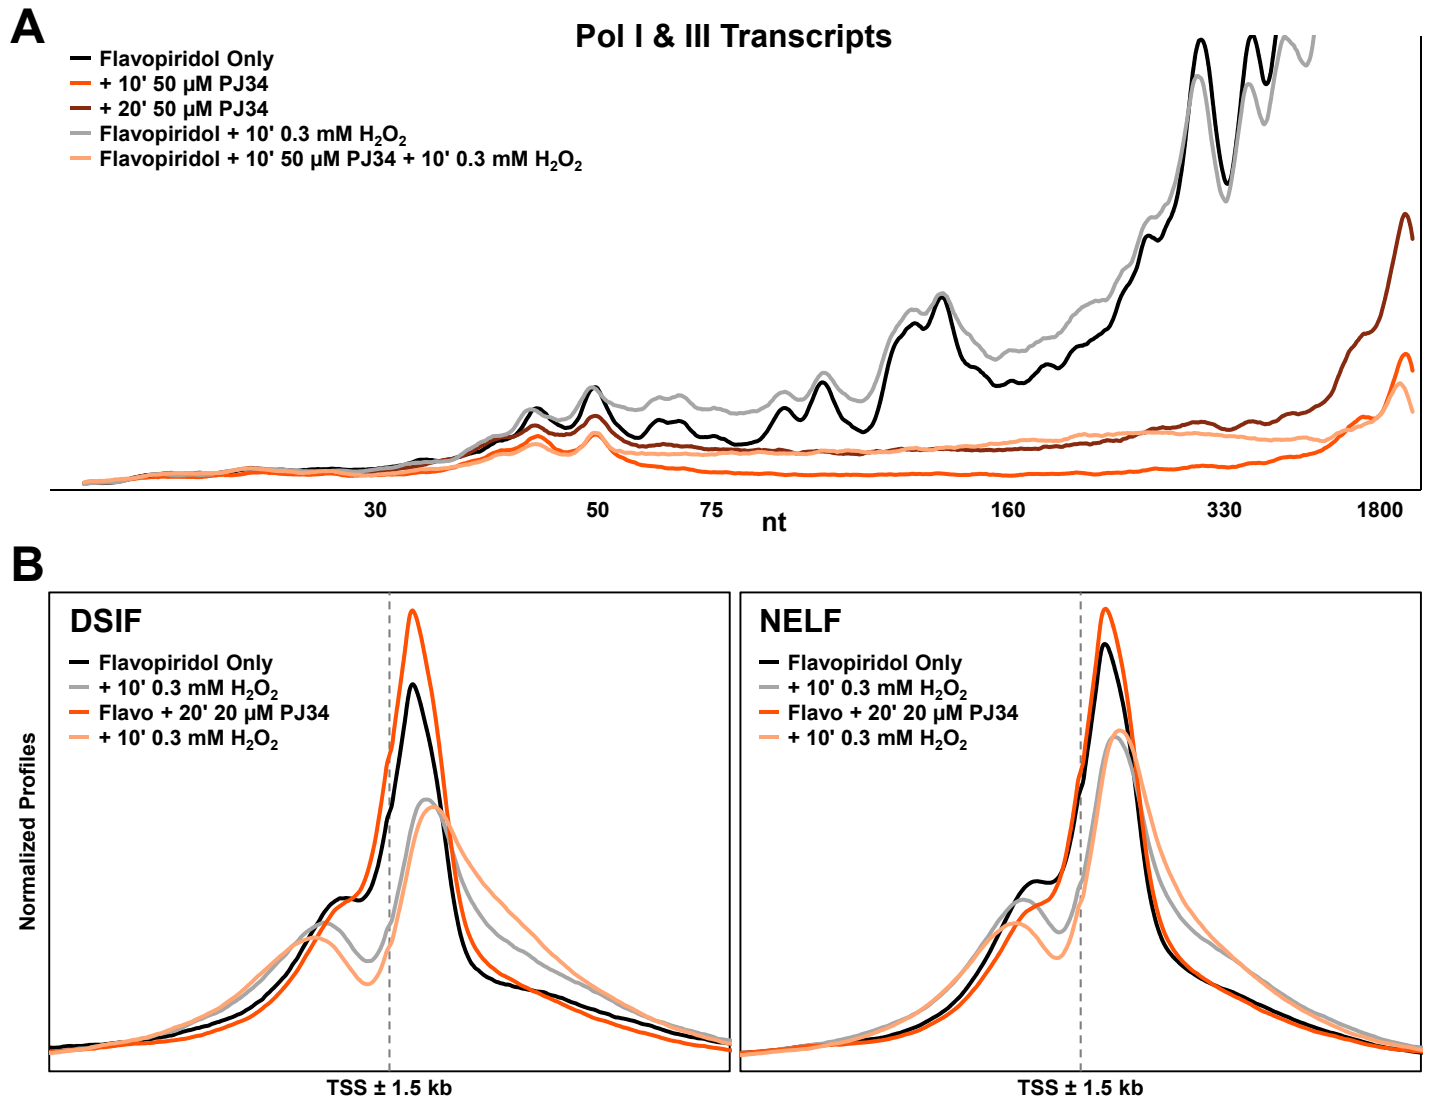

**Figure S6. Effects of PJ34 on Pol I, Pol III, DSIF, and NELF, related to Figure 5.**

(A) Amanitin-insensitive Pol I and III nascent transcript profiles from a nuclear walk-on using nuclei from adherent HeLa cells treated 50 min with 1  $\mu$ M flavopiridol, then 10 min with 0.1% DMSO (Flavopiridol Only), 10 min with 50  $\mu$ M PJ34, or 20 min with 50  $\mu$ M PJ34. Cells were additionally treated 10 min with 0.3 mM  $H_2O_2$  as indicated. DMSO was 0.2% in all conditions. (B) The experiment in (A), except HFF were grown at 100% confluency for 2 weeks prior to treatment.

(B) Average normalized DSIF ChIP-Seq occupancies  $\pm$  1.5 kb around 17,592 EPDnew TSS. Suspension HeLa cells were treated 40 min with 1  $\mu$ M flavopiridol, then 20 min with either 0.05% DMSO (Flavopiridol Only) or 20  $\mu$ M PJ34. Cells were additionally treated 10 min with 0.3 mM  $H_2O_2$  as indicated. The vertical axis represents depth-adjusted signals that were background-subtracted and normalized using a window  $\pm$  10 kb around genes.

(C) The experiment in (B) except with average normalized NELF ChIP-Seq occupancies.
