# Supplementary material for: Oxidative stress rapidly stabilizes promoter-proximal paused Pol II across the human genome
Source: Oxford University Press journal article supplement (doi:10.1093/nar/gkx724), 2017-08-09
Supplement: gkx724_supp.zip [file gkx724_supp.zip › nar-01907-v-2017-File011.xlsx]

## Sheet: Genes with NELF change
Genes with Increasing NELF After 35 min H2O2			Genes with Decreasing NELF After 35 min H2O2
Largest increase in NELF	SLC25A25		Largest decrease in NELF	RPL37
(Top 2000 are bold)	AMACR		(Top 2000 are bold)	RPL27A
	NDRG1			ZNF7
	WDR47			EIF4B
	PHLDA2			RPL8
	VAMP1			TARDBP
	HLA-A			EEF1G
	CDKN1C			RPS27
	GTPBP8			HNRNPA3
	EGLN3			GTPBP4
	LMBR1L			EIF4A2
	BPGM			SMG1P3
	DBR1			NUP155
	GPR89B			SLC25A6
	NR4A1			RBM3
	ADM			EEF2
	FAM46C			RPL41
	RGS2			HSPA9
	NR4A2			RPL27
	ADCK5			PRPF38B
	LPL			RPS29
	SLC1A3			RPS16
	NOTCH2			RPL35
	JUN			RPL13
	PPFIBP1			EIF1
	PDE4DIP			RPL5
	SDC2			NEAT1
	KIF21A			ATP6V1E1
	LGMN			HSPA4
	PHACTR4			CREBZF
	IFI30			SARS
	UAP1			MTA2
	NBPF1			PRPF8
	HMGCS1			LRRC75A-AS1
	RGS16			RPS17L
	PIM2			RPL29
	NCOA3			SMN2
	RSBN1			RPL30
	C3orf58			JAGN1
	ATG2A			NPM1
	EMC2			TARS
	TLE4			NRAS
	C2orf44			PSMB1
	ABTB2			MRPL36
	2016-03-03			CELF1
	ID3			PPP6C
	CSRNP2			COASY
	IDI1			PNN
	ZNF92			JTB
	GUSBP1			IPO7
	FAM126A			CNBP
	OSR2			HNRNPF
	SERTAD1			C11orf58
	TRIB1			EEF1A1
	GINS4			EIF2S2
	CTSL			PPP2CA
	GADD45B			RPL3
	IRF1			HNRNPC
	DGAT1			CCNT1
	PLEKHO2			LOC100652736
	MRPL35			GARS
	CLU			RBM4
	FOSB			SLC35E2B
	RND1			TBP
	DYRK3			RPL18A
	NANS			EIF3H
	FAM43A			RPS15A
	UVRAG			UBA52
	C5orf42			RPS23
	ATF3			RPS26
	ST3GAL1			PYGO2
	PDE8A			CCT3
	PTGER4			OAZ1
	RNU11			RPL23
	BAZ1A			UBXN1
	ELF3			RPL10
	SEL1L			PPP1R15B
	NOTCH2NL			2016-03-06
	NQO2			RPS15
	PLK2			RPS20
	HBEGF			C19orf53
	SELENBP1			CDKN1B
	SRSF8			SNRPA1
	GSTT2			SNRPB
	DLL4			RPL19
	TNK1			HNRNPH1
	DAB2			RPL23A
	TRIM68			RBM14-RBM4
	ATXN7L1			RPL22
	MED21			RPL10A
	HLA-E			RPL32
	2016-03-02			CHPF2
	DEPTOR			RPS7
	TARSL2			EIF3L
	SAT1			RPL11
	MT1X			FUS
	CRISPLD2			CDK12
	MXD1			PSMD7
	KRT8			PRCC
	ID1			RPLP1
	LOXL2			EIF3M
	PNPLA3			SRSF10
	SLC8B1			SF3B4
	TTC23L			RPS6
	STK17B			RPS3
	TAF4B			ZBTB43
	IER5L			FADD
	SLC30A5			STX16-NPEPL1
	LOC80154			CAPRIN1
	NXF1			ATF4
	SLC2A3			THRAP3
	EFNB1			TRMT10C
	PITRM1			RBM39
	MYO1E			MRPL23
	BRMS1L			SP3
	VCL			LAMTOR1
	TP53RK			ZFR
	DNM1L			CSDE1
	PDLIM7			MOB1A
	ATOX1			CLNS1A
	RBM34			SUB1
	CTSB			DNTTIP2
	ZNF670			SNHG6
	CDKN1A			RABGGTB
	GRN			APRT
	SPC24			TDG
	SPRYD3			RPS13
	FAM63B			EIF3E
	CCNE2			RPL26
	WDFY2			RPS9
	DDX12P			IREB2
	SMTN			PIP5K1A
	MIIP			RPS14
	CCNB2			GNB2L1
	PSMD8			LDHB
	DCXR			DDIT4
	CEP152			ETF1
	VWA5A			RPL14
	SDCBP			TTC9C
	KLF5			RPL22L1
	ARHGAP27			CHERP
	ZDHHC13			SLC7A5P2
	PPAP2B			MCL1
	SPATS2			MAPK1IP1L
	CNTLN			TUBA1B
	PTGS2			UBLCP1
	TBX3			CCT4
	PPT1			RPL24
	GLRX			TOMM20
	RNU4ATAC			RPL13AP5
	EMP1			SRSF3
	ARRDC3			SERBP1
	TSPYL2			TPM3
	DTD2			TRA2B
	TUBGCP5			PSMA5
	SOX13			RPS12
	TUFT1			RPL36
	RP2			MPV17
	ACER3			NAT10
	ZCCHC10			ARF3
	JARID2			BNIP2
	PPOX			DHX9
	LINC00673			TAF15
	NARS2			LENG8
	QSOX1			PRPF3
	ARHGAP19			EIF2S3
	HCP5			C14orf2
	TPST1			WDR73
	DHODH			EXOSC4
	PFKFB3			SPG7
	IRAK2			SNIP1
	SLC19A2			ATG101
	KLHL25			TGIF1
	ULBP3			CTC-338M12.4
	DDIT3			PDHA1
	PNP			EIF3A
	ALG6			LTBR
	CLCC1			ZBTB6
	TYW1B			TBRG4
	TXNIP			PSMA1
	SIAH1			FNBP4
	GADD45A			PPP1R2
	DIO3			ZNHIT2
	NET1			MYC
	VDR			TIMM17A
	PRPS1			TUFM
	SNAI2			TBCA
	OSGIN1			MRPL24
	TMEM168			TOR1AIP2
	CPNE8			VAPA
	NDUFA12			TNFRSF1A
	RNF13			TRMU
	PGM2			LARP4
	ITPR2			WDR45B
	EHHADH			NDUFV1
	XPR1			POLR2E
	CCDC88A			EIF3G
	SOX4			RAB9A
	USP53			RPS10
	HAP1			SURF6
	KCNK5			TSTA3
	ACYP2			RPL6
	CASP10			ZNF207
	AKR1C1			PSMB7
	GCAT			C16orf91
	FBN1			MRPL12
	LOC100499484-C9ORF174			LUC7L2
	ICAM1			KHDRBS1
	WDR48			CHMP1B
	SERF1B			GMPS
	CTH			NOP2
	DAAM1			NFE2L2
	RNF103			RAB10
	ANKRD37			RPLP2
	ALDH7A1			CCT8
	PTCHD2			ATP5L
	ATF7IP2			SF3A3
	LPCAT2			GAPVD1
	PLA2G4A			ZMPSTE24
	C9orf114			ARGLU1
	CLN5			BTF3
	ISOC1			PSMA3
	C5AR2			ZNF707
	OS9			NUP153
	CTR9			RCC1
	TNFSF9			YOD1
	TNFRSF21			ALDOA
	PPP2R5D			PPAN-P2RY11
	NEU1			DDX46
	FAM13A			MRPS21
	OASL			POMP
	C12orf66			HNRNPUL1
	TAB1			REXO4
	SMAD6			RPL37A
	TESK2			LSM4
	FBXL20			LINC00657
	ADI1			RPS3A
	KATNA1			UQCRC2
	OAT			PES1
	EMP2			NDUFAB1
	ADRB2			TRIM41
	PTER			SF3B1
	BCL2L11			CANX
	ABCD4			PSMB4
	NEDD9			TMED10
	SLC35A1			RARS
	HES1			SMUG1
	FAAH2			TUG1
	KITLG			PSMA6
	FDXR			TUBB
	ISCA1			RPS8
	HEXB			SEC24A
	TFAP2C			FLAD1
	FOS			TVP23B
	ARHGAP18			UBL5
	LINC01155			GGNBP2
	TNRC6B			TTC32
	ATG10			C12orf73
	LIPT2			AK2
	ENDOG			MED10
	TNFAIP8			UBOX5
	TTBK2			DDX47
	CDC25C			RAB5C
	RALGAPA1			DNAJA2
	HELB			NFX1
	CEP55			EIF3D
	TMEM2			SRP19
	CDKN3			SRRT
	SQRDL			STRAP
	RUNX1			DDT
	ZNF33B			COX8A
	RABGAP1L			RPL31
	PRKCDBP			DRG1
	ZDHHC17			PRRC2C
	SPTAN1			TMEM115
	MYO10			GDI2
	JMJD1C			MRPL20
	DBT			MARS
	POU2F1			PEX6
	VGLL4			CSNK2A1
	RASD1			ARPC5L
	ALDOC			VARS
	TRIM5			MID1IP1
	ABHD5			TIMM13
	ABHD10			SSR1
	MT1E			MTRF1L
	MYBL1			DCTN2
	DUSP22			NHP2L1
	TAF2			KIAA0907
	POLE2			HNRNPU
	BCKDHB			YDJC
	KIAA1715			FLOT1
	NEK2			WAPAL
	TBC1D12			LETMD1
	COL5A1			DDX39A
	NR4A3			CLTC
	PTPRK			ORAOV1
	E2F7			ALDH16A1
	FSCN1			C15orf40
	GOT1			SLC30A6
	ARL4D			USP19
	DIMT1			EDC3
	DSTYK			ZMAT2
	GGH			CCNL1
	SLC26A2			NSUN4
	ATG16L2			TMED7
	IER5			TUSC2
	CFD			ZNF500
	ADK			GHITM
	AARS2			INCENP
	FBXO4			PPIA
	NPL			C6orf47
	USP45			NIPA2
	TTC27			TMED4
	CDC14A			FLYWCH2
	RND3			API5
	SKAP2			PARN
	CSRP2			PSMD2
	FAM83D			SGTA
	GDF15			COPB2
	PCK2			ACACA
	STK38L			NEK9
	RABIF			RPS5
	MAN2A1			SUMO1
	MSTO2P			WDR43
	LPCAT3			BFAR
	NCEH1			NDUFS5
	BAMBI			ZC3H10
	TMEM216			CSTF2T
	HAUS5			RPL28
	RIPK2			HOTAIR
	RNF125			NOLC1
	CD58			NFE2L2
	LTA4H			LDHA
	TSPAN13			MINOS1-NBL1
	KDM2A			TOMM7
	ANXA1			FAM120AOS
	ESYT3			KPNA6
	ANXA4			RLIM
	BNIP3			RPL32P3
	ADCK3			PPIB
	TERF1			PTPN23
	PELI1			GTF3C2
	MPDU1			MED17
	GUSBP4			ARFGAP2
	MTMR10			EMD
	AHR			DVL2
	SDC4			YWHAE
	B4GALT4			TMEM11
	MT2A			GPBP1L1
	ROBO1			BCL2L2
	PRCP			GCN1L1
	MAN1A1			MRPS16
	NUAK2			C11orf30
	MYL6			PABPC1
	CRYM-AS1			GPAA1
	WWOX			PAFAH1B1
	PHLDA1			UTP3
	TEX30			PTPN11
	RPS6KA5			HAX1
	SLC12A6			WDR24
	STAM2			RC3H2
	CRADD			HSPA1B
	ERO1LB			MSH5-SAPCD1
	TAF9B			CHURC1-FNTB
	C1orf204			KLF10
	RNASEH2C			SNRPG
	LRCH3			CDC27
	DNAH14			TMEM69
	RBM6			COX7C
	ERGIC2			RPS21
	PLEC			RBCK1
	AMMECR1			ZNF622
	CADM1			RTCB
	PANX1			MAGOHB
	SLC9A3R1			MIEF1
	CRELD1			SUPT16H
	MCUR1			SUPV3L1
	IVD			PVRL2
	KIAA1279			DCAF12
	GTF3C6			PA2G4
	SELT			SNHG7
	NSFP1			NDUFS6
	TNFRSF10D			SLC38A2
	MTERFD3			RPL39
	PTRF			LUC7L3
	UBAP2			SART3
	TAF8			C19orf43
	CENPC			PSMD1
	TIMP1			SCAF11
	OSBPL8			PCMTD1
	DCPS			ASPH
	ACSS2			MYL12A
	PPP1R12B			CDK4
	IPO13			ZNF512
	ADSS			DHX15
	RP11-554F20.1			ANP32B
	TBCC			UQCRFS1
	SUGT1P3			HNRNPA0
	GOLGA6A			USP39
	FAM72C			MARK3
	CDKN2C			PGS1
	MTFR1			ABCF3
	AURKB			SRRM1
	TGFBR3			RPL21P28
	BTN2A3P			ATP5E
	ANKRD36			PDE3A
	GEMIN2			SUMF2
	ELP3			GPR107
	SGK1			SLC25A36
	GDA			SLC7A5
	HIBCH			DDTL
	TRIM21			CLASRP
	STXBP3			ILF2
	ENTPD3-AS1			GLCE
	GFOD1			AP1G1
	STARD9			ARPC1A
	C4B_2			APEH
	ZC2HC1A			PRPF4B
	BTRC			FUBP1
	THEM4			MYNN
	RBM19			IGF2BP3
	FBXO21			GSK3B
	COMMD1			TIMM23
	DGCR6L			DGUOK
	SLC25A19			EID1
	EIF2B3			RBM12
	HOXA5			PSMD3
	EIF2AK3			ARL8B
	PMVK			SRSF1
	TJAP1			ANAPC7
	LATS1			TGOLN2
	SLC26A6			CHD2
	XRCC6BP1			SENP3-EIF4A1
	SYAP1			EIF3CL
	RP4-756H11.3			RPS4X
	LMF1			YWHAG
	DHRS4L2			LINC01021
	MICU1			ADSL
	C5orf30			FXR1
	TANGO6			LOC100133091
	DSCC1			HP1BP3
	ARL2BP			SNHG17
	GLS			UBE2K
	EXOG			TMEM99
	BMP5			MALAT1
	ESPL1			RSL24D1
	COMMD6			COX7A2L
	RPP21			TPX2
	DFNB31			FEM1A
	FAM151B			PSME3
	IL17RA			SCYL1
	TADA1			RPS6KB2
	RPUSD3			C19orf25
	CNKSR3			TMEM223
	C8orf4			PCF11
	LOC643770			PSMC4
	PUS7			SLMO2
	EPS8			PAPD4
	SERPINE1			CCNB1IP1
	SEC14L4			COPG1
	GALK2			HINT1
	TOR3A			SNRNP48
	NBPF11			PARS2
	GLG1			ARPP19
	PIGH			SRP9
	PARP16			DPF2
	RNF122			CRTC2
	SMOC1			KIAA0947
	VASH2			MFSD3
	RBMXL1			PPIG
	SLC16A13			TOMM22
	ASL			NSRP1
	CEP68			SIVA1
	SYS1-DBNDD2			INTS3
	ANGEL1			MRPL55
	PDE7B			MANBAL
	ZNF720			LINC00263
	PGRMC1			SDE2
	C12orf45			POLR1D
	ZWINT			SCD
	METAP1D			BRPF1
	SELM			MRPL53
	TSC22D4			TSN
	MIPOL1			HCCS
	NR1D1			ATP5B
	UBASH3B			PGAM1
	UHRF1BP1L			TOMM6
	IFI6			RP11-752G15.6
	MYO5C			PSMB3
	ACAP2			MTHFD2
	HAUS4			HSP90AA1
	SCP2			ZFP36L1
	CST3			ATP6V0E1
	SP6			MYL6B
	RP6-206I17.2			CFL1
	ZC3HAV1			HAUS6
	JAG1			TNPO1
	GUSBP11			LOC100288069
	SHCBP1			CALU
	BMS1P1			RAB18
	AGBL3			GPN2
	JMJD7-PLA2G4B			ATF2
	CEP70			PSMC2
	LAP3			MLX
	CDKAL1			SBDSP1
	TMEM161A			TMOD3
	SLC9A1			XRCC5
	NHS			MTG1
	PCNXL4			DNAJB1
	MON1A			NDUFV2
	CBR1			KAZALD1
	CCDC134			SNHG8
	RSPH3			SLC33A1
	FAM86B3P			RAD23A
	PRADC1			RUVBL1
	BLM			ORC2
	GPATCH1			DDX39B
	RABGEF1			DNAJC16
	ALG1			C2orf43
	SCFD1			ZNF197
	POLE4			UBC
	KIZ			HERC4
	EBP			WDR61
	MAFB			SNHG12
	RPP40			SF3B2
	EDN1			ZNF263
	SELK			RRM1
	BPNT1			SMEK2
	ZNF74			DHX16
	CXCR4			POP7
	TOR2A			SUZ12
	PSEN1			POLR2J3
	BRMS1			NUPL1
	PPARD			LRR1
	ABCC5			HEXIM2
	HSPA4L			SEC23IP
	RP11-983P16.4			POM121
	RBM45			ATP5G3
	CCDC80			NDUFS8
	TTC38			VPS28
	PIGU			ZNF131
	CREBL2			MTPN
	SPIN4			ZNF837
	NFU1			SNRNP200
	CTSC			CS
	SLC47A1			HSPA8
	RHEBL1			TOB2
	CCNJ			RANBP2
	HES2			HNRNPR
	ALCAM			SNAPC5
	GRAMD3			ZNF507
	DUSP10			COX7B
	RTN3			HOMEZ
	STAT2			GTF2A2
	AACS			TAF7
	ANP32E			ATP6V1G1
	FLNB			UBXN4
	ASXL2			LOC440434
	MSX2			SFSWAP
	GOLGA2P7			CDK9
	CBLB			EMC9
	ABCB9			BCLAF1
	STARD5			TAMM41
	PTPN4			MTG2
	CEP78			SLC35F6
	AGFG2			NOC2L
	SH3RF1			NVL
	CLDN12			PGK1
	SNAI1			AZIN1
	VRK2			ZNF195
	ACAT1			TSNAX-DISC1
	UNC13B			USP15
	VASP			SZRD1
	ZNF519			AHCYL1
	MCCC2			PSMD4
	RICTOR			RACGAP1
	RAB11FIP1			PSMA4
	RAB5B			EIF3C
	GCLC			PPM1G
	POLR1E			ZFYVE27
	BTBD10			MYCBP
	LGR4			SSU72
	ZNF624			EYA3
	MICU2			ZNF451
	CCDC34			CSNK1A1
	KATNBL1			CUL7
	SMA4			ANP32A
	DUSP6			LSM8
	ZNF843			AFF4
	PCCA			ATXN2L
	DUSP19			HOXC10
	ITGAV			UBE2G1
	PNPLA8			CAP1
	NRP2			C6orf48
	RBM43			ZZZ3
	SGOL2			GLRX3
	CCNO			TXNRD1
	SLC25A30			RDH11
	SHMT1			MAT2B
	APMAP			IFITM3
	RMDN1			HNRNPD
	C16orf95			TPD52L2
	SLC31A2			C12orf10
	PYGL			CTTN
	KIAA1324L			TMEM179B
	HRH1			S100A11
	SERINC5			TMEM14C
	SRPK2			GOLGA5
	GINS2			GBAP1
	KAT6B			RFWD3
	DNAJB4			SLC25A3
	ZNF273			GABARAPL1
	FAHD2CP			PSMD11
	CD2AP			KDELR1
	LOC727751			BMS1P4
	EEF1E1			FBXO46
	CDC73			RABGAP1
	EPAS1			ARRDC3-AS1
	CDCA7L			TSG101
	EIF5A2			ABCF1
	INTS2			GPBP1
	FAM178A			TEX22
	C2CD5			PRMT3
	PRDX4			RBM42
	ATF6			GNB1L
	CNP			RPL38
	CCDC85B			ZKSCAN1
	GK5			PRR14L
	MRPS35			LOC100129917
	P4HA1			FAM156A
	CLIC4			DNAJC8
	NEU3			SNRPD1
	MPHOSPH6			RAB5A
	TJP1			UQCR11
	MIS18A			CHMP4A
	EPG5			EIF4A1
	UACA			SEC11A
	DPH1			NDC1
	CCDC61			SYVN1
	SIRT5			TMEM167B
	ANKRD26			EIF3K
	SLPI			PIH1D1
	LNPEP			NAP1L4
	DYNC1LI1			ZNF34
	MICALL2			ARF6
	STAMBPL1			ZNF638
	USP47			SSR3
	TEC			POLR2B
	ATP6V1B2			TSFM
	RSU1			RPP14
	MON2			TRA2A
	CCNDBP1			GPATCH8
	NDUFA4			SRSF6
	IFT88			MALSU1
	SLC25A51			CYCS
	HMOX1			SNHG5
	TMEM126A			E4F1
	MEX3B			COX6B1
	MID1			AP5S1
	PIP4K2C			SQSTM1
	C16orf58			SNRNP70
	SAMHD1			SLC25A39
	PAIP2B			GDE1
	FAM64A			VPS72
	MFN1			RBM25
	PMP22			DUSP1
	EPB41L2			ZNF394
	PTPN13			TRMT61B
	SHB			CDCA8
	LMNA			DDX23
	MRPL1			FAM200A
	LMO7			THUMPD3
	SLC35G1			TNPO2
	PGAP1			RBM5
	EXOC6B			N4BP2L2
	USP18			ZBTB26
	FOXO3			MISP
	SMEK1			TALDO1
	RP11-132A1.4			FBXW11
	GNS			CSNK1D
	VASN			PPP1R35
	VAX2			VPS25
	CCDC150			ZNF16
	FICD			PPCDC
	MLXIPL			COPS5
	ACCS			NAPA
	VPS13B			RPUSD2
	ZNF184			M6PR
	GPATCH3			TTC1
	OSBPL3			RAB14
	ZNF484			GABARAP
	GALT			PAFAH1B2
	SRFBP1			MRPL34
	SMIM4			EDF1
	CYP2R1			PARK7
	N6AMT1			LDLR
	MICA			C3orf17
	VWDE			SPATA2
	C10orf10			RPN1
	PWWP2A			GOSR2
	ACBD7			CDC37
	ITIH4			CRYBB2P1
	PIGA			C21orf33
	PIF1			ATXN10
	ZNF589			LRPPRC
	SLC35B4			MED15
	THBS1			CACUL1
	PIGT			DLST
	TRIM38			TMEM39A
	FOSL1			DNAJA3
	LIMK2			AKIRIN2
	PQLC3			PRRC2A
	APC			C1orf159
	FAM168A			PLEC
	YWHAQ			NKIRAS2
	DEPDC1B			ARIH1
	FAM46B			MRFAP1L1
	TSPAN12			APH1A
	CDPF1			DNAJC11
	GCH1			MRPL33
	DHRS4L1			ZNF770
	P2RY6			FEM1B
	NARG2			DDX56
	ALMS1			RPS11
	DHRS7B			PAGR1
	TFDP2			BIRC5
	ACER2			UBE2N
	FAM76A			LUC7L
	OGG1			SMC3
	FOPNL			CDKN2AIPNL
	CYP1B1			ZC3H15
	HLA-C			UBQLN1
	EXPH5			MID1IP1-AS1
	PIGS			SMARCE1
	L3MBTL2			RP11-1072A3.2
	EMR2			TAF13
	CALM1			VHL
	C3orf52			RTFDC1
	UBE2D1			UBE2H
	AHNAK			C20orf24
	OBFC1			PDCD6IP
	HMOX2			TUT1
	ZNF771			SLC38A1
	C1GALT1			IMP3
	QTRT1			CCT7
	TBC1D7			UBR4
	ZNF41			PAPOLA
	KLHL20			BRF2
	EDN2			LOC100630923
	GALM			RSL1D1
	VAV3			NRBP1
	PDIA4			PTMA
	SMYD5			RWDD1
	PGD			MAP3K7
	IMPA1			ZDHHC5
	CYP2S1			CDC42
	FBF1			PFDN5
	ALAS1			COX7A2
	ERV3-1			USP33
	SLX4			SERTAD3
	RAP2B			EPB41L4A-AS1
	KIAA1377			PCM1
	RCBTB2			CARS
	SLC35D1			ABT1
	NSMCE4A			SPSB2
	CNNM2			SLC9A8
	MAN1A2			C11orf31
	CCDC15			MAPKAP1
	FKBP14			AGPAT1
	PTPN6			RBM27
	CCDC69			E2F4
	CHMP4C			DNAJC2
	EDEM3			XBP1
	IFT27			OSTC
	SUPT3H			EIF1AX
	TRIM45			RTF1
	TMEM144			TRNT1
	CSPG4			AEN
	BCAS3			BRD2
	PLK3			ARPC3
	SNX29			NAP1L1
	GPHN			MTUS1
	TULP3			LLPH
	ATG4C			EML2
	GSTA4			DDX17
	ATP2B4			IDH3B
	C12orf43			SLC4A2
	MRPS22			IWS1
	ADAMTS1			PUM1
	SCAMP3			CCDC174
	NDUFAF1			GOT2
	STBD1			ASB6
	ZFYVE16			KPNB1
	PPM1B			SPECC1L-ADORA2A
	AKAP9			ATP6V0D1
	GORASP2			SND1
	ZSWIM1			PNISR
	PPP1R8			CTDSP2
	GOLGA6L10			RAF1
	CPM			CCDC130
	GSTT1			PLEKHG2
	ARMC1			CD55
	PPP1R3E			EXOSC3
	CDKN2C			DDOST
	P2RX4			PPP1R37
	BTG1			CACTIN
	PRDM1			ZNF267
	VSIG10			PSMG4
	IL1RAP			CYB5B
	SLC30A3			RLF
	PER1			SSFA2
	CCDC14			COX20
	ACY1			TSSC1
	CEP120			IPO4
	LIN37			NUDC
	RAET1G			PIK3R4
	VPS8			SNX1
	ABI1			PLP2
	ELOVL7			VPS53
	PHF19			SPCS3
	ZNF37BP			UBA2
	USF1			AKIRIN1
	ISG20			YKT6
	MESDC1			VCPKMT
	ANGPTL4			POLRMT
	ADAMTSL4			MRPL45
	SLC29A3			SLC35A2
	BLOC1S6			RPE
	TRIM2			WDR37
	ZC3H6			DKC1
	ACSF2			PRC1
	AP1AR			ZNF800
	ATXN3			IST1
	MESDC2			SAE1
	RNF169			CD46
	MIPEPP3			GPKOW
	ADAM22			TSR2
	CMTM7			SEC24C
	FAM3C			SUPT4H1
	BIK			HPS6
	TMX4			MYEOV2
	ZNF114			DNAJB6
	FAM134B			XRN2
	THG1L			METTL2B
	RPF1			FRA10AC1
	HBA1			EID2B
	MICB			ZNF148
	ENOX2			UQCC1
	IFITM1			PPIL4
	MCM10			C1QBP
	ETNK1			DAXX
	UBE2J1			UFSP1
	C9orf40			FIS1
	SLC25A14			N6AMT2
	GOLGA6L5P			DLGAP1-AS1
	SLC25A26			ACAD9
	CAT			LAMTOR3
	KIAA1191			NPEPPS
	PYROXD2			WDR6
	SPRYD4			PPP4C
	PRPS2			BLOC1S4
	DIP2B			NDUFB7
	FANCL			RNF26
	MESP1			YTHDC1
	AUH			GATAD1
	SAYSD1			POLR2J
	ABLIM1			ZNF317
	PIGM			GON4L
	FAM98A			PCIF1
	IPO8			GEMIN6
	FITM2			FBXO22
	SNAP23			SNHG11
	ICK			NUP214
	GOLIM4			DHX33
	GBA			ANXA2
	ULK4P2			SCARNA2
	DUSP4			CRKL
	CPEB4			IPPK
	ULK4			CCNG1
	NEIL2			TUBA1C
	CDH24			RHOT2
	NDUFS2			NDNL2
	H2AFJ			ATP5A1
	MAST4			NUDCD3
	SLTM			STOML2
	RINT1			TNPO1
	FAM111B			WASL
	RCN3			UBE2D2
	CNNM3			NGDN
	MFI2			RBBP6
	WFS1			RFT1
	SLC25A46			NUFIP2
	ZNF708			RPP25L
	XPA			NME1
	DNAJC3			MUL1
	GAS2L3			CHORDC1
	LAMA4			YLPM1
	CKAP2L			C1orf109
	TNFRSF12A			GOLGA4
	TPCN2			EIF3F
	ESCO2			DALRD3
	ERO1L			ZC3H11A
	ACP6			HMG20B
	ZNF260			STAMBP
	ALAD			EDC4
	KLHL24			AP2S1
	TSPAN14			ZNF460
	MORC4			EPRS
	SGK3			TTC33
	TGFA			CEBPZ-AS1
	SMPD1			PSMB5
	BBX			ZSCAN25
	ISOC2			CRK
	KLHL21			SNX19
	TMEM109			AKAP8
	FAM86C1			GTF2F1
	RHOV			SIL1
	FAM72B			MOGS
	DNASE2			ZNF343
	TOR1B			ETFA
	NFKBIZ			ZNF121
	PLEKHF2			USP14
	ZNF440			MRPS15
	MTMR9			UBXN7
	PRKCZ			SLC38A10
	RGS3			SAR1A
	EPHA2			TMEM33
	TBC1D15			SNRPF
	RNASE4			COX6A1
	ZHX1			TIMELESS
	MPI			USP9X
	CDK5RAP2			STOM
	TMEM206			HSPA13
	PDSS2			AP5B1
	SDSL			ZNF687
	CYSTM1			H3F3AP4
	OSBPL9			SF3B6
	CD320			C18orf21
	GTF2IRD1P1			PTDSS2
	LINC00668			RP11-290F20.2
	ZNF2			MAGEF1
	ZNF33A			COX5B
	C8orf31			RNF7
	SNAPC1			SYF2
	GOLGA8R			TOMM40
	CEP164			TAOK2
	DGKH			SAP18
	APBB2			SREBF1
	CMSS1			BTBD3
	CLYBL			XPO1
	PLIN5			NQO1
	BTBD8			NMD3
	ACTRT3			MTCH2
	C16orf80			VEGFA
	RERE			SMNDC1
	EIF4A3			SNRNP27
	TUBB2A			SSB
	FAM86JP			KIF23
	C21orf91			MTMR2
	POLG			PCBP2
	GCNT2			MFAP1
	CLCN5			ACBD5
	PCAT6			LSG1
	WLS			CCNC
	TAF12			ZNF23
	TRAPPC6B			ZSCAN12
	KIAA1161			PPRC1
	RPS6KC1			RRN3
	ZPR1			AHCY
	AP3B2			U2AF1
	DTX2			MDM4
	MLKL			ZNF544
	LINC00888			MATR3
	CBWD5			CHCHD10
	KIAA1919			DDX19B
	NAT1			FAM96A
	MIR181A2HG			RNF10
	ATXN7L2			KCTD13
	NUP35			LINC00959
	STK10			NCLN
	GTF2H2			FAM103A1
	H1F0			ACTR2
	SPAST			PAK2
	GJB7			HCFC1
	ZNF573			NONO
	SNX2			PUM2
	ZNF678			SMU1
	SLC20A1			KIAA1429
	SEMA4F			CABIN1
	COMMD9			ATXN1L
	UBA1			NOP56
	C14orf132			ZNF250
	PDE4DIP			UBR5
	PGF			HNRNPM
	STYX			INTS1
	KLF2			GNL2
	POC5			NOP58
	TLX3			B2M
	HHEX			EMC4
	FASTKD1			ACTB
	NFKBIE			FUK
	TYK2			HNRNPUL2
	DSC3			EP300
	C14orf169			DET1
	C6orf1			GOLPH3
	BIRC3			SNRPE
	DBF4B			KXD1
	CCDC171			TOP1
	ZKSCAN2			ARCN1
	CCRN4L			PFAS
	ATL2			SMG1
	LONRF3			KNSTRN
	VBP1			CLP1
	WDR70			SENP5
	DISP1			LINC01220
	ACBD6			CDK11A
	RAD9A			MRPS10
	PFKFB4			ZCCHC8
	TBC1D10A			TMEM260
	SHROOM1			SCAF8
	AP3B1			MTAP
	ZFYVE26			MBTPS2
	GM2A			ACTN4
	MAD1L1			E2F3
	SPICE1			C6orf89
	LSR			MCTS2P
	BLVRB			MUS81
	TMEM52			TRAPPC3
	FAM102A			FAM120B
	CBR3-AS1			JUNB
	RAB32			MRPS17
	ZYG11A			PLEC
	SPC25			TFIP11
	EEFSEC			RAB7A
	TWSG1			ERCC5
	NGLY1			SIX5
	APOBEC3B			EED
	STARD13			PGLS
	PEPD			PSMC3
	EOGT			PTP4A1
	TRMT2B			NOL10
	TECR			TMEM14B
	DNAJC13			IP6K2
	ZC3H7B			TFE3
	ARL17A			MRPS18A
	COMMD3-BMI1			HNRNPL
	PRPSAP1			ZNF24
	IKBKE			TCEA1
	NOC3L			ATAD3B
	TWISTNB			DBNL
	RILPL2			CWC25
	AK1			TBC1D22A
	SLC5A3			PRKAB1
	STEAP3			NUP85
	NIPSNAP3B			MIF
	ETHE1			PTBP2
	C5orf45			AHSA2
	ENTPD1-AS1			FBXL18
	C1orf115			DDX55
	MFGE8			CNN2
	HSPB8			PUS1
	C6orf203			MAPK14
	MIA3			USP48
	PEX19			SCAF4
	SUOX			ZNF629
	SLC35F2			TRIM27
	SPTLC2			YWHAB
	KIAA1033			CKS2
	NABP1			APEX2
	SLMO1			SIN3A
	NOL11			MED25
	EIF4G2			TPM4
	ANGEL2			LRRC47
	ZNF48			KDM1A
	STIM1			TPRKB
	NUDT15			WRAP53
	C16orf62			SFPQ
	AMER1			CHD8
	TFB1M			TM9SF1
	TMEM65			EFNA1
	SLC35E3			PSMD12
	TOP1MT			USP11
	FAM86FP			RRP7A
	MCCC1			TRIP6
	VIM			SESN2
	ARHGAP29			NRSN2
	DHDH			TCEAL4
	WDR75			TM9SF2
	FBXO25			ERGIC1
	COG1			ATG7
	NDUFS4			LINC01089
	ZNF254			MTF1
	HYKK			ANKRD10
	CCDC104			DAD1
	UCP2			BAX
	PLAUR			JPX
	SNX16			TFAP2A
	TRIM59			DPH7
	PDCL			XPOT
	IDS			ECHDC1
	KCNAB2			MKLN1
	HSPB1			CHCHD2
	STK17A			TICAM1
	NOV			BBS1
	DUSP3			CAND1
	MPP5			XRCC2
	CCDC113			PBX2
	CBWD3			AMZ2
	CD44			CWF19L1
	XYLB			ATG16L1
	SH3RF2			C7orf43
	WDR91			CCNB1
	ACRBP			FAM3A
	HSD17B7			LINC00963
	SCLY			ORC5
	PCSK5			RPS2P32
	BIN3			PFN1
	ASNSD1			BAZ2A
	UNC45A			C1orf35
	PCMTD2			ADAR
	GLT8D2			TNKS
	LOC344887			PRDX3
	SYNRG			TOP3B
	EXO5			UBE2B
	VKORC1			GAS8
	SEPHS2			WDR33
	LARS2			C8orf59
	FERMT1			INO80B-WBP1
	MPV17L2			ATXN7L3B
	MTR			MED27
	PDPR			VMA21
	TPBG			CUL1
	SPAG4			SAR1B
	NPM3			TGIF1
	PMM1			FRMD8
	POR			MVP
	ARHGEF28			FAM200B
	TMEM14A			RP11-399K21.14
	SKP1			CALM2
	ZNF25			SNRPB2
	MED24			DHX36
	LINC00938			PRICKLE3
	KIAA1551			ZNF410
	USE1			GPATCH2L
	C1orf198			MED9
	PRORSD1P			GPR108
	KIDINS220			METTL5
	ALKBH8			IARS
	SMARCA2			NPRL3
	RAET1K			KRR1
	FAM160A2			UBE3A
	HSPA5			C11orf73
	SAV1			CNOT11
	TM2D1			GRHPR
	RNASET2			KTI12
	RASL11A			CCAT1
	UPRT			TXNRD1
	ZNF786			DIS3L2
	BCAS2			DHX34
	WDFY1			NAF1
	AGA			CMBL
	EHD4			ATP6V1C1
	ARID5B			MAP3K11
	CASP6			FAM60A
	SRD5A3			HDHD2
	ABHD3			FAM120C
	PDP2			C1orf52
	ANKRD46			RB1CC1
	ADIPOR2			SDHB
	RIN1			GEMIN7
	ZBTB20			RP11-384K6.6
	SEMA3G			SEC23A
	CRIP1			BOD1
	IGFBP5			TRAPPC12
	ZNF675			GPSM3
	SPRY4			PTGR2
	EGFEM1P			PPP6R3
	GLIDR			FTSJ1
	ATAD2B			FTH1
	TEX9			CAPNS1
	ZNF44			C18orf32
	IDNK			FIP1L1
	TGFBI			INTS10
	ALG10			AP5Z1
	SLC2A8			NFIC
	CCDC101			CDC20
	TMEM62			SDHAP2
	TMED9			RMDN3
	UBXN2B			FH
	RNASEH2A			NUCKS1
	PERP			PABPC4
	FGGY			COQ10B
	EDEM2			STT3A
	CPNE3			GNAL
	ANAPC5			TBL3
	TMEM192			LONP2
	CDKN2B			SHISA5
	YARS2			C14orf166
	PCYOX1			CTDSP1
	FAM46A			DUSP28
	ARC			ATP6V0B
	ABCC6P2			TAF11
	C12orf5			KLHDC4
	NIPSNAP3A			TIMMDC1
	VAT1			ZNF691
	EEPD1			RAD52
	MBOAT1			MINK1
	TCIRG1			WBP5
	SLC9B2			NOA1
	L3MBTL1			PYURF
	ALG10B			YY1
	FUCA1			TRMT1
	FAM135A			PTPMT1
	CCDC167			MICB
	ZNF774			SRP54
	FAM84B			POLG2
	SLC4A7			C5orf28
	NKX3-1			E2F3
	LOC100134868			THOC2
	DCAF4			RBMX
	MCOLN1			CBX5
	C12orf29			C8orf76
	OLFM1			C18orf25
	C14orf28			TUBG2
	TBCCD1			NXT1
	SETX			COG3
	CPD			MAVS
	ABRACL			CCAR1
	MPV17L			C15orf39
	DGCR6			TCEB3
	ANKRD39			C1D
	TMEM180			RAB21
	UBE2Q2P3			RAB11A
	ELAC2			ACIN1
	CASC5			SLU7
	CCDC77			GSTO2
	CPVL			EFCAB14
	CEBPB			CHCHD3
	DCK			PHF12
	TMEM107			GRB2
	ZNF138			LARS
	GPR20			COX18
	DDX11L2			CCNI
	RSRP1			NSUN5
	MANF			RPS24
	TVP23C			TIMM10
	ARRDC1			DGCR14
	DNAJC10			SPATA5L1
	CMAS			AP1B1
	SNAPIN			MINPP1
	CABLES1			ZNF497
	TMX1			LSM6
	IGFBP3			DIDO1
	ING3			SNX12
	PARP1			ERCC3
	BBS7			KLF10
	INIP			IVNS1ABP
	PLOD2			MBLAC1
	SULT1A1			MTF2
	SPG11			CD59
	RAB28			SCAND2P
	TMEM50B			ZMYM1
	TSTD3			ZNF778
	RABGEF1			PXDN
	LRRC58			C22orf39
	TMEM41B			SLC25A38
	SYNM			PSAT1
	ZNF254			ZNF580
	GEMIN5			MEGF8
	STPG1			ZNF557
	NOD1			TIMM22
	WBP1L			MTDH
	CYB561D1			KIF2A
	SEC14L2			SEC31A
	MAFF			CDK5RAP1
	MYO6			NCOA7
	AGPAT4			TMCO1
	DECR1			SETDB1
	DDX10			2016-09-09
	DYNC1H1			ZNF79
	ZNF703			SSR2
	ESYT1			P4HB
	GPSM2			IRF2
	RNVU1-19			YIPF6
	MATN1-AS1			MARS2
	WDYHV1			ELL
	MAP3K1			TXLNA
	ZNF619			PYCR1
	GCC2			APTX
	TMEM131			LEMD2
	LOC100294145			DEGS1
	FZD1			C2orf42
	MXD3			MED18
	ITGA6			SPTY2D1
	HIP1			PDE4D
	SOCS1			NEURL4
	TPK1			MAP4
	TTC14			ZNF35
	CASP1			OAZ2
	ADAMTS5			BSG
	RCL1			PSMG1
	LINC00663			NCL
	KRT80			QRICH1
	FAM8A1			ETAA1
	SH3BGRL3			MSANTD4
	HSD17B11			NOL7
	NUMB			STK38
	ZBTB9			MRFAP1
	HEATR3			GSG2
	NFKBID			RAD18
	BCL6			CNOT1
	SORBS1			CASP8AP2
	GDAP1			SUV420H2
	FANCI			DDRGK1
	KGFLP2			NOL12
	FTCDNL1			HERPUD1
	MKL1			TXNL1
	TUBB4B			DCUN1D5
	CLPP			LRRC59
	ZNF696			LOC100289230
	SCARB1			TOR1AIP1
	F8A1			FBXO28
	IFT140			SF3B5
	ABCA1			EVA1C
	FAM220A			PCMT1
	RANBP17			RPS19
	MCIDAS			LEKR1
	WDTC1			ZNF562
	GCHFR			GMPPB
	ALG14			DFFA
	FCHSD2			TRIB3
	ARHGEF3			MDP1
	UNC119			LINC00472
	SLC35E4			NDEL1
	DRAM1			CLIP1
	DLX3			ACTR1A
	MANBA			BST2
	HUS1			ZC3H18
	C9orf41			RAB20
	KIAA0922			IFRD1
	S100A4			SNRPC
	PTAR1			PSMC1
	NINL			ASS1
	COQ5			MTO1
	GPR180			PDCD7
	EPB41			CLINT1
	CCT6P3			BUD13
	NMNAT3			RPTOR
	MEMO1			AMBRA1
	GMCL1			TFAM
	PDHB			COPZ1
	ULK3			MPPE1
	MTMR3			ITCH
	NDE1			PIGL
	AIP			TMEM165
	TTC21B			RAB1B
	ZNF443			COG2
	ATF7IP			NAGLU
	GCNT1			UBE2J2
	PLXNA2			GTPBP3
	MAP2K3			SAMM50
	GSTK1			RHOB
	TAOK3			NOB1
	RNF144B			RPS19BP1
	BBS10			TANK
	LUCAT1			POMZP3
	C9orf106			CNOT8
	LOC653501			APPBP2
	COPS6			SDAD1
	UBA1			WDR45
	PKD1L2			PLD1
	DEDD2			WDR82
	DOK7			AP3D1
	EZH1			TCOF1
	GRAMD1C			NFAT5
	RBBP5			SHFM1
	ZNF684			FKBP1A
	RP11-112L6.4			CXorf38
	RBBP9			IKBKG
	CSF2RA			AJUBA
	YEATS4			BUB3
	SUMF1			CUEDC2
	TCTN2			ZBTB33
	INTS8			AKT1S1
	FOXO1			KIAA0020
	ELL2			FNTA
	CHD1L			CUTA
	RPAP3			C6orf136
	ATP1B2			RTN4
	POLB			TMEM214
	LIX1L			SLC35B1
	PPAPDC1B			TWF1
	PRRT3-AS1			NDUFB4
	ERCC6L			NAPB
	ZNF485			EIF4H
	ABCB8			ZNF764
	CCDC7			EID2
	VPS33A			POLR2K
	PON2			HNRNPL
	FUT10			ZNF12
	FOCAD			CDKL3
	SBF2			POP4
	SGMS2			FBXL12
	RARG			NABP2
	INTS4			C6orf226
	RRBP1			PKN3
	EXT1			SNHG15
	PHKA2			XXYLT1
	RPL7L1			RWDD2B
	ABCA5			VPS37B
	CCDC126			DDA1
	HOMER1			DAGLB
	SREBF2			EPC1
	OXR1			C21orf59
	MAOA			GNL3L
	ZNF101			FAF2
	PHKA1			PRPF19
	LINC00466			UBAC1
	APOBEC3C			NAA25
	LMO4			BECN1
	KDM5B			CLTA
	NBPF3			DNAJA1
	2016-09-06			C16orf13
	CXorf40A			MRPL11
	S1PR2			AAR2
	TMEM38B			TOPBP1
	NBN			ZNF8
	RGS10			CBLL1
	MAP3K6			PANK4
	AKR1B1			SIRT7
	EGF			PRKRIP1
	RPAP1			GALNT7
	RAB8B			INTS5
	ZNF300			KAT8
	PRTG			B3GAT3
	MDFIC			ABCF2
	SVIP			CTDSPL2
	PM20D2			PHC3
	MCM2			TCERG1
	GNG11			XRN1
	ZMAT1			CDC6
	TJP2			SMG8
	PGBD1			MRPS25
	ACTR5			WDR60
	POLR3E			DCTN6
	PDLIM1			DOCK5
	IL17RC			REPIN1
	HES7			UCKL1
	CENPE			WDR74
	FRAT2			NDUFV3
	RPA2			FARSB
	ARAF			ARL5B
	CWF19L2			NADSYN1
	GFPT2			NME6
	RAD51D			RPRD2
	PLTP			QPRT
	WDR59			UBAP1
	FAM104B			RFWD2
	GOLGB1			PLEC
	TIPIN			PLA2G6
	FOXJ2			ZNF789
	HAS2-AS1			TRAPPC5
	ADA			PHF13
	ATP10D			RIMKLB
	SERPINB1			LINC00467
	RP11-95P2.1			ERI1
	C11orf80			GTF3C3
	EMBP1			C14orf93
	CMTM6			C2orf49
	SPIN2B			HSF2
	DDX60			UGCG
	SMPDL3A			PIK3C3
	SFMBT1			MBD3
	PPP1R3C			WHSC1L1
	ARG2			CCDC57
	FBLN5			CC2D1B
	LHX2			PCOLCE
	TRNP1			ZNF205
	TIMM44			GYPC
	ECHS1			NUP54
	CHRFAM7A			THOP1
	PTPN1			SFT2D3
	PRELID2			INF2
	PCOLCE2			NUCB1
	NCOA4			ZBTB2
	2016-09-11			FASTK
	CACNA2D1			FBXO47
	PIGK			LENG9
	ARL15			CDKN2AIP
	FADS3			DCAF7
	MICAL3			DEK
	DHRS7			LARP4B
	UTP20			NT5C
	ARID5A			UBE3C
	TIMP4			RAVER1
	NES			PARD6B
	ZNF430			CCZ1
	NDUFB10			UTP23
	EXOC4			GABPB2
	HOXD9			SLC30A9
	CTNNAL1			PRSS21
	UGGT2			ASNA1
	TONSL			DYNLRB1
	GYG1			TM9SF4
	PTPRG			RNF168
	PRPSAP2			SLC7A6
	CPPED1			DNAAF2
	ZC3H8			ANKHD1-EIF4EBP3
	ZFAND4			LAS1L
	MED30			DDB2
	ELK4			AKAP8L
	PNMA1			CMC1
	CDK18			SPAG7
	PAQR3			MTCH1
	FAM86A			SUDS3
	TMEM256			LINC00896
	MPC1			KLHL9
	KLHL8			HSBP1
	USP3-AS1			TMEM70
	TYW1			TYSND1
	NUDT8			TAF1
	SFXN5			HMGN3
	LEMD3			PRSS56
	CEP85L			HEMK1
	ZNF695			AP2B1
	IFI35			ASCC2
	CYR61			RBX1
	ALX1			FTX
	ARHGEF5			IFRD2
	EIF2D			MRPS23
	NPR1			LRRFIP2
	SEMA3C			RAB1A
	GEMIN8			CXorf56
	KIF3A			KDM6A
	WRB			UBXN8
	CASP8			TOP2A
	PACRGL			R3HCC1L
	ETS1			SPECC1
	TTC39B			ZDHHC4
	SPPL2A			DYRK1B
	GK			SLC29A2
	PAPSS1			POLR2M
	PLS1			MRM1
	AGO3			MTERFD2
	ARL13B			NUP43
	TTI2			PP7080
	PRKAB2			COX6C
	PLIN2			OLA1
	PCLO			SHC1
	PRKAA1			SNHG16
	INPP5J			PDZD8
	C15orf52			SART1
	PYROXD1			VPS18
	STK35			PSME1
	WDR19			RRP7B
	C10orf32-ASMT			PDRG1
	FAM98C			SLC25A44
	FHOD1			GSE1
	GOLGA6B			MYBBP1A
	RBM4B			ZNF581
	APOOL			TMEM9
	ISL2			BMS1
	ZNF564			ARL6IP5
	POLI			WDR18
	RP3-322G13.5			MTX2
	TMBIM4			PDE12
	OMA1			ELK1
	SNX15			LTV1
	EPHX1			CCDC66
	ERC1			ALDH3B1
	MAGT1			RNF207
	FRG1B			CTNNBL1
	PPARGC1A			KIF18B
	TMEM184C			OST4
	SLC9B1			SETD7
	HLA-H			PSMF1
	SNX24			TOR4A
	BCL2L13			ZNF574
	IL27RA			PTK2
	ATRN			ZNF324
	SHISA4			ZNF212
	FAM160A1			MED4
	ARAP1			ANKRD17
	GPR176			MED6
	LINC00568			CMPK1
	IFNAR2			TIAL1
	UBE3D			WDR45
	ZNF627			PEX16
	OXR1			B4GALT5
	SPEF2			DHX37
	C17orf96			LSM14A
	MTRF1			TRIT1
	ZNF846			BTBD1
	RPP25			KIF11
	LZTR1			PMS2P3
	ZNF286A			MCM3
	ARHGEF17			STX6
	STX12			ITPRIPL2
	CRY1			GLO1
	GMIP			PET117
	ARSJ			SMARCC2
	CCDC50			ANP32E
	KRT17			LIMCH1
	C9orf64			C11orf65
	RNF20			ZNF587
	GSTM4			THUMPD1
	AKTIP			RIOK2
	PRIM2			EXOSC2
	TXLNG			ZFP36L1
	GNAS			AFG3L2
	SPR			PLEKHB2
	MBNL2			LOC441242
	C15orf41			XRCC1
	CEP250			RABEP1
	RPL39L			MTHFD2L
	STRIP2			PRPF39
	TRIM14			GOSR1
	FBXO16			RHOF
	ACOT7			GFM1
	ZNF18			NUP210
	KIF2C			GNAS-AS1
	OSBP2			RNF44
	MFSD2A			ACSL4
	LYPD3			PNRC2
	BCAM			BMP1
	ABCC6P1			SCAF1
	TXNDC11			GMFB
	FDX1L			CAD
	PITX2			RCC2
	SCD5			B3GALNT2
	RBL2			SLC25A17
	NRG4			FRS2
	ERICH1			CRTC3
	TEX2			C7orf73
	CLN8			BAIAP2L1
	RP9P			2016-09-09
	KIAA0101			KLHDC10
	SPATA7			ATIC
	H2AFV			EIF4EBP1
	MYH10			UTP11L
	CAP2			GATAD2B
	MST1R			WWP2
	C5orf15			TBL2
	PGGT1B			CHCHD1
	ERAP1			SLC38A1
	ZNF700			AQR
	RAD54B			MIER1
	FAHD2B			MMS22L
	SLC11A2			KPNA2
	ZNF823			PSMB6
	MFN2			ACTG1
	DHCR7			PEX10
	DCP1B			BHLHE40
	LOXL1			UBE2V1
	TUBB6			ELP6
	PARVA			PRPF6
	MYD88			MRPL45P2
	FAM13A			LAMP2
	FLJ39080			UNK
	CFH			TMEM230
	SMIM14			NAA16
	MAP3K4			POLR2C
	IMPDH1			TMEM259
	NECAP1			CSNK1A1
	LINC01023			SEC22C
	ATG4D			RRP1
	C9orf89			KANSL2
	FMNL3			CPT2
	ZNF438			ZDHHC7
	URM1			RCE1
	ODF2L			MLLT10P1
	HLA-F-AS1			NME3
	AR			PYCR2
	G6PC3			MARK2
	GINS3			COPB1
	ZNRF2P1			MED11
	GRWD1			CREB3L2
	ARL2-SNX15			RARA
	FERMT2			TKT
	BRCA2			TAF1C
	OXR1			ISY1
	TNIP1			CDCA4
	TMEM134			DAZAP2
	SIGIRR			LINC00909
	RASSF1			KBTBD6
	CD276			UTP14A
	TMC5			MDC1
	BBS2			WDR55
	GPX1			MICA
	CAMK2G			ELOF1
	TECPR1			NR6A1
	RGL3			RNF216
	LOC101927279			AC009299.3
	ZNF160			AHCTF1
	GPR126			MAGEA3
	FMNL2			TOMM5
	CYP11A1			ZNF586
	ARHGAP24			UCK2
	GAB1			LOC728613
	TOMM40L			TAPBP
	ABCB7			CNOT3
	IL1R1			ZER1
	MGC45800			NFXL1
	KGFLP1			COMMD4
	NUBP1			LINC00493
	FUCA2			PDE1A
	MARCKSL1			PFDN1
	DESI2			ZNF584
	RGS20			ATN1
	CLEC2B			PHYKPL
	TCF7L2			KDELR2
	RHBDD1			NCOA4
	DZIP1L			DANCR
	MSRB1			RAPGEF6
	GPR37			NDUFC1
	CNNM1			STEAP4
	WDR44			USP22
	LINC00324			UBE4A
	TRIM2			USP3
	SLC27A3			C6orf57
	MRPL52			GMEB2
	KIFAP3			NF2
	METTL7A			CTBP2
	SNX27			UBE2W
	HOXB13			ATF1
	FAM109A			DUSP11
	SYNJ2			SH3BP5L
	FAM127A			RBM23
	GNAI2			SUCLA2
	TCTN1			ANKRD52
	TTC30A			MGRN1
	JPH1			MBD1
	ITGA5			INO80C
	SPATA13			DMKN
	PANK3			ATP5I
	FAM122C			TMEM128
	TMEM194A			ZNF337
	C9orf16			JUP
	SAC3D1			AKAP10
	CAPN2			HOXC11
	MAP7D3			PPP5C
	USP6NL			CCZ1B
	SPTLC3			NASP
	TMEM141			CLK2
	ALS2CL			FOXN2
	PEA15			MEF2D
	FN3KRP			ARPC1B
	PLA2G16			PPP1R11
	CREG1			FARSA
	TTC23			PPP2R2A
	HBP1			CRBN
	HSDL2			DDX18
	B4GALT7			RHOT1
	ART5			EIF4G2
	ALDH1A3			CCDC124
	AHCYL2			PMPCB
	FAHD2A			SNF8
	TMEM170A			POM121C
	TRMT11			DYNC1LI2
	UQCC2			TIA1
	CORO7			SIK2
	CCNYL1			MCRS1
	LINC00265			NCAPG2
	ZNF346			SLC25A24
	FAM129B			FAF1
	NAGA			VCP
	MAPKBP1			FAM219B
	TBC1D2B			H2AFX
	ADHFE1			MAGEA6
	S100A6			DHX30
	KDM4C			COX14
	ABHD2			LOC102724827
	SP4			JUND
	ZNF28			RFX5
	OPHN1			HSD17B10
	SH3BGR			MBD6
	DTYMK			GRPEL2
	NT5M			PLRG1
	MIR181A1HG			EIF3B
	MGST3			ARL1
	UNC45A			PRKAG1
	CDC25B			AP2M1
	SLC16A7			TRIM28
	LPIN3			ALKBH5
	UBE2Q2P3			C5orf34
	LEPREL1			TAOK1
	PMP22			PWP1
	SCIN			MGC72080
	MTX3			ZCCHC3
	SNX4			HDHD1
	CLASP2			FIBP
	KIF3C			DENR
	STXBP1			PHF21A
	CRYBG3			BUB1
	ISPD			ZMYND8
	ZNF552			ETV5
	BTN2A1			ITFG3
	MB21D1			NR2C1
	C1orf21			YAE1D1
	P4HA3			HUWE1
	HELZ2			PLEC
	GAN			NELFA
	PPM1K			PMP22
	TIFA			ZNF251
	BPHL			MTMR9LP
	MFSD9			RCCD1
	RP11-699L21.1			YAP1
	KIF13B			TINF2
	PPIC			NUP93
	NT5C3B			GTF2I
	INSIG1			BRK1
	NAV2			ZW10
	ZNF223			ADRM1
	AIF1L			LOC220729
	CALD1			TXN2
	OTOG			FAM199X
	SYNE2			SUMO2
	MAP2K3			MAK16
	CNKSR1			STC2
	LYRM9			ITPRIP
	RNF19A			C5orf51
	MTFP1			TXN
	FCHSD1			RANBP6
	MYH9			BAZ1B
	ACOT1			MRPL44
	BAZ2B			PTS
	NUDT3			NUPL2
	LINC00674			GDI1
	PUS3			RP1-93I3.1
	DDX60L			RFC1
	SSBP2			MMP24-AS1
	FAM204A			IRF2BPL
	BMPR2			NPC1
	DMXL1			TNFSF13
	RHOBTB1			NAA30
	NUDT16L1			FAM168B
	YTHDC2			UBE2V2
	MCOLN2			UBE2V1
	ABCD3			INSIG2
	STARD3NL			IMPA2
	GALNT11			TMEM55B
	CCP110			SRP72
	SERGEF			SLC37A3
	MAMDC2			SPTBN1
	TMEM45A			CCDC84
	TOR1A			HLCS
	ZNF280D			TTF1
	ULBP1			AGGF1
	GALNT18			STUB1
	MAML3			DAG1
	BOLA1			AARSD1
	ZSWIM5			C19orf55
	ACADS			TACO1
	RNF43			TRIM4
	NCR3LG1			THOC5
	ZC3HC1			EIF4G3
	LRP6			DHX8
	EPS8L1			WEE1
	MOB3C			NFRKB
	RTKN2			CUL9
	CYTH2			SLC35E2
	MRPS31P5			BRPF3
	MSH2			PRMT1
	NSUN6			PDSS1
	CHRNA7			ATPIF1
	SCFD2			VPRBP
	ATP9B			UBR1
	SMYD3			LOC645513
	SLC10A7			BCL9L
	STIL			FAM208A
	KLF12			PTBP1
	ZFP64			PEX12
	CACFD1			SIGMAR1
	PPP1R21			PEX26
	ESR2			C1GALT1C1
	RNF215			ADAMTSL5
	MYCBP2			SUCLG1
	GSTM1			SRSF4
	NMT2			PKMYT1
	FBXO32			ZSCAN16
	SYCE2			NET1
	PJA1			TPP1
	DDX27			INPP5B
	INO80D			ZNF462
	SIX1			NECAP2
	KDELC2			NIFK
	VDAC3			ORAI3
	ZNF77			MAD2L1
	ABL2			C8orf58
	KCTD1			TCEA2
	AGO1			FAM13B
	DIAPH3			TLE3
	ARFGEF1			FLJ13224
	SQLE			CT45A5
	FAM91A1			OTUD7B
	HMGCR			GRPEL1
	SMARCD2			POLA2
	PDK4			KLC1
	ATP8B3			DENND4B
	PIAS1			SSH3
	SH3GLB1			C1QTNF6
	TDRKH			ZNF133
	METTL16			ARID1A
	DUXAP10			ATP5J2
	KIAA0895L			LAMA5
	NIPAL1			ATP1B3
	ZFP14			LOC391322
	PIK3R1			POLR2J4
	ELOVL4			KIF5B
	TRIM15			ERBB2IP
	HM13-AS1			ZSWIM8
	NBEAL1			BCL3
	ZNF618			ZNF330
	SMTN			FAM208B
	CERS6			OPA3
	AATF			PPP1CC
	ASRGL1			RHEB
	SHF			STAT6
	NOMO3			SMG9
	PRMT6			TMEM187
	ALKBH7			GPX8
	HCG11			REXO2
	TAF3			MCAT
	MTFR2			SLC1A5
	RPGR			PRDX2
	PLAT			RAB8A
	OSBP2			MRPL17
	PLS3			ZUFSP
	PAPSS2			RNF213
	DTWD2			EIF2B2
	PTGES			ATXN2
	CDKL1			RPARP-AS1
	MR1			KCTD3
	FLJ36777			MKRN3
	HCG4B			DLD
	NAAA			NAA60
	PI4K2B			PDDC1
	ENTPD7			HMGA1
	TMEM120A			DYRK1A
	PDCL3			MPZL1
	NAPEPLD			SDHAF1
	RNF223			ROCK1
	PLA2G15			TSPAN31
	DYNC2LI1			UBTF
	SNX6			GABARAPL2
	CEP135			MAPK1
	PRDM2			CBR4
	LOC730101			PNKP
	PHPT1			MSL2
	NKAP			SFXN4
	HSPA6			CENPM
	COL12A1			HOXB7
	EXOC2			PROSC
	GEM			PHB
	CLK4			PPP2R1A
	CDC42EP2			PHF6
	CCDC169			TCTEX1D2
	DIAPH2			LINC00886
	PGM2L1			XPO4
	TMEM50A			TMF1
	SNX13			PURB
	TMEM184A			CD151
	MMAA			GALNT2
	F11R			FAM49B
	ANKRD36B			LOC643072
	SUGT1P1			PHF20
	RBL1			UEVLD
	PAG1			MEIG1
	PDE4C			UPF1
	RPIA			ANXA7
	NEK7			POLR2H
	SFI1			SRPK1
	ARHGAP42			HSPBAP1
	TXNDC15			TERC
	TBCE			PLEC
	FRYL			CCDC53
	ANAPC4			NUDT13
	QDPR			ZKSCAN3
	SLC46A1			DERL1
	COQ3			ZNF106
	CTGF			TMSB4X
	FAM58A			JOSD1
	IDE			BIRC6
	TPGS1			MED26
	SLC41A3			LMAN1
	FSIP1			HIPK3
	GFOD1			FAM86C2P
	SLC38A9			TRNAU1AP
	PLAGL1			MIDN
	HIBADH			UHRF2
	UBXN11			IER3IP1
	FOXRED2			DNAJB12
	SMYD2			POLD1
	RWDD3			NFIC
	RNF2			FANCA
	LIMA1			BTAF1
	LYST			RRP12
	AMN1			WEE1
[truncated: 342 more rows]

## Sheet: 2000 increasing NELF genes GOBP
Term	Overlap	P-value	Adjusted P-value	Z-score	Combined Score	Genes
lipid biosynthetic process (GO:0008610)	79/491	0.000209677	0.0919854	-2.36148	5.63478	SCARB1;PI4K2B;PIGU;CMAS;TP53RK;HEXB;TECR;AKR1B1;ADM;FADS3;SPTLC2;IMPA1;SCP2;SPTLC3;SMPD1;CYP2R1;FDXR;NANS;SH3GLB1;PRKAB2;EDN1;STARD5;CERS6;ACOT7;EDN2;DGAT1;HMGCS1;ELOVL4;PLA2G4A;ALG1;ELOVL7;PLA2G16;ALDH1A3;PPAP2B;PIGA;ISPD;PPARD;PIGH;PTGES;LIPT2;IDI1;PRKAA1;MTMR3;ACSS2;INSIG1;GBA;LPL;SGMS2;HMGCR;ABHD5;PIK3R1;HSD17B11;HSD17B7;CLN8;PTGS2;AGPAT4;EBP;CYP11A1;PMVK;INPP5J;PDSS2;LTA4H;GK;PNPLA8;SCD5;SRD…
small molecule catabolic process (GO:0044282)	50/261	9.24667e-05	0.0919854	-2.35628	5.62237	SCARB1;ABCD3;HIBADH;SQRDL;NUDT3;GLS;ABHD10;AUH;IMPA1;SCP2;SMPD1;DBT;NUDT15;ACADS;HIBCH;MCCC2;ACOT7;MCCC1;BCKDHB;DIO3;ASRGL1;GCAT;PLA2G15;PCCA;EHHADH;ETHE1;IVD;IDNK;SMPDL3A;ALDH7A1;PPARD;PCYOX1;ECHS1;SHMT1;NPL;ACAT1;GK5;PDPR;ASL;DTD2;DECR1;GK;GOT1;MMAA;PNPLA8;SRD5A3;SUOX;QDPR;AMACR;CTH
monosaccharide metabolic process (GO:0005996)	45/221	6.00999e-05	0.0919854	-2.3333	5.56754	PRKAA1;PFKFB4;GALT;PFKFB3;SLC35D1;HIBADH;FUT10;SLC2A3;OMA1;PYGL;PDHB;MAN2A1;OTOG;PDK4;PGM2;PPARGC1A;GYG1;XYLB;WDTC1;PCK2;TCF7L2;PMM1;GOT1;IGFBP5;FUCA1;DCXR;FUCA2;DHDH;PHKA1;PPP2R5D;PGD;PHKA2;PGM2L1;USF1;RPIA;GCLC;G6PC3;PPP1R3C;CRY1;GALM;ALDOC;CALM1;GALK2;ATF3;PPARD
hexose metabolic process (GO:0019318)	39/187	0.000117877	0.0919854	-2.31576	5.5257	PRKAA1;PFKFB4;GALT;PFKFB3;HIBADH;FUT10;OMA1;PYGL;PDHB;MAN2A1;PDK4;PGM2;PPARGC1A;GYG1;WDTC1;PCK2;TCF7L2;PMM1;GOT1;IGFBP5;FUCA1;DCXR;FUCA2;PHKA1;PPP2R5D;PGD;PHKA2;PGM2L1;USF1;RPIA;G6PC3;PPP1R3C;CRY1;GALM;ALDOC;CALM1;GALK2;ATF3;PPARD
angiogenesis (GO:0001525)	45/236	0.000222138	0.0919854	-2.28793	5.45929	CLIC4;NRP2;EPAS1;SERPINE1;TGFA;PRCP;PTGS2;TSPAN12;SHB;HOXB13;THBS1;SAT1;ETS1;CYR61;CTGF;LOXL2;DLL4;CASP8;HMOX1;CYP1B1;ITGAV;SLC12A6;E2F7;VAV3;SRPK2;JUN;GPX1;JAG1;TNFRSF12A;EGF;ERAP1;C1GALT1;PARVA;ARHGAP24;PGF;PDCL3;KLF5;ID1;MYH9;CSPG4;ANGPTL4;ITGA5;TGFBI;MFGE8;EPHA2
organic acid catabolic process (GO:0016054)	40/200	0.00020858	0.0919854	-2.25874	5.38964	ECHS1;ABCD3;HIBADH;SHMT1;SQRDL;NPL;GLS;ACAT1;ABHD10;PDPR;AUH;SCP2;DBT;ASL;ACADS;DTD2;HIBCH;DECR1;MCCC2;ACOT7;MMAA;GOT1;MCCC1;BCKDHB;DIO3;SUOX;GCAT;ASRGL1;PLA2G15;QDPR;AMACR;PCCA;EHHADH;IVD;CTH;ETHE1;IDNK;ALDH7A1;PPARD;PCYOX1
carboxylic acid catabolic process (GO:0046395)	40/200	0.00020858	0.0919854	-2.25614	5.38342	ABCD3;ECHS1;HIBADH;SHMT1;SQRDL;NPL;GLS;ACAT1;ABHD10;PDPR;AUH;SCP2;DBT;ASL;ACADS;DTD2;HIBCH;DECR1;MCCC2;ACOT7;GOT1;MMAA;MCCC1;BCKDHB;DIO3;SUOX;ASRGL1;GCAT;PLA2G15;QDPR;AMACR;PCCA;EHHADH;CTH;ETHE1;IVD;IDNK;ALDH7A1;PPARD;PCYOX1
carbohydrate catabolic process (GO:0016052)	29/120	0.000101989	0.0919854	-2.24529	5.35754	PFKFB4;GALT;PFKFB3;HIBADH;FUT10;HEXB;PYGL;GK5;NEU3;ABHD10;GM2A;NEU1;PGM2;GYG1;XYLB;MANBA;GK;DHDH;NAGA;PHKA1;PPP2R5D;BPGM;PGD;PHKA2;PGM2L1;RPIA;IDNK;ALDOC;CALM1
single-organism carbohydrate catabolic process (GO:0044724)	27/113	0.000203921	0.0919854	-2.23023	5.32161	PFKFB4;GALT;PFKFB3;HIBADH;FUT10;HEXB;PYGL;GK5;NEU3;ABHD10;GM2A;NEU1;PGM2;GYG1;XYLB;GK;DHDH;PHKA1;PPP2R5D;BPGM;PGD;PHKA2;PGM2L1;RPIA;IDNK;ALDOC;CALM1
G2/M transition of mitotic cell cycle (GO:0000086)	31/139	0.000208339	0.0919854	-2.16611	5.16862	CDKN1A;LIN37;CEP164;CCP110;CCNB2;CEP70;CEP250;NEK2;BTRC;NINL;CEP78;SKP1;CDK5RAP2;PLK3;DYNC1H1;CDKN2B;CEP135;CEP152;NDE1;TUBB4B;TERF1;CDC25C;CDC25B;LATS1;ALMS1;AKAP9;TUBGCP5;PPP1R12B;SFI1;NES;TAF2
cell cycle G2/M phase transition (GO:0044839)	31/139	0.000208339	0.0919854	-2.16362	5.16267	CDKN1A;LIN37;CEP164;CCP110;CCNB2;CEP70;CEP250;NEK2;BTRC;NINL;CEP78;SKP1;CDK5RAP2;PLK3;DYNC1H1;CDKN2B;CEP135;CEP152;NDE1;TUBB4B;TERF1;CDC25C;CDC25B;LATS1;ALMS1;AKAP9;TUBGCP5;PPP1R12B;SFI1;NES;TAF2
small molecule biosynthetic process (GO:0044283)	66/394	0.00025943	0.0984754	-2.3539	5.45622	ASNSD1;TECR;MTR;ADM;GLS;FADS3;PNP;SPTLC2;IMPA1;SCP2;CYP2R1;SEPHS2;PRKAB2;EDN1;ACOT7;EDN2;HMGCS1;ELOVL4;PLA2G4A;ELOVL7;ALDH1A3;ALDH7A1;PTGES;LIPT2;IDI1;PRPS1;PRKAA1;OAT;ACSS2;SLC35D1;INSIG1;SHMT1;GBA;SLC1A3;LPL;SGMS2;HMGCR;HSD17B7;PTGS2;ACAT1;EBP;CYP11A1;PMVK;PDSS2;ASL;LTA4H;PLTP;GOT1;MMAA;GCH1;PNPLA8;SCD5;COQ5;ACER2;SQLE;COQ3;GCLC;AMACR;ADI1;CTH;ACER3;LPCAT2;CSPG4;ADCK3;DHCR7;LPIN3
glucose metabolic process (GO:0006006)	32/149	0.000297365	0.104192	-2.23326	5.05055	PRKAA1;PFKFB4;PFKFB3;HIBADH;PYGL;OMA1;PDHB;PDK4;PGM2;PPARGC1A;GYG1;PCK2;WDTC1;TCF7L2;GOT1;IGFBP5;DCXR;PHKA1;PPP2R5D;PGD;PHKA2;PGM2L1;USF1;RPIA;G6PC3;PPP1R3C;CRY1;GALM;ALDOC;CALM1;ATF3;PPARD
microtubule-based process (GO:0007017)	70/437	0.00052586	0.161193	-2.39987	4.38013	GPSM2;SPEF2;ULK4;CEP120;CASC5;CCP110;GCC2;TPGS1;LYST;RPGR;TUBB6;MCIDAS;RNF19A;KIF13B;KIF21A;NEK2;KIFAP3;CDK5RAP2;GAS2L3;CEP135;IFT140;STARD9;SPICE1;HAUS4;AP3B1;HAUS5;MID1;AP3B2;DYNC1LI1;IFT88;TUBB2A;ESPL1;MAP7D3;MYH9;KIF2C;HAP1;KIZ;CNP;PRKCZ;AURKB;ATXN3;BLOC1S6;SNX29;SPAST;KIF3A;KATNA1;TTC21B;LMNA;FOPNL;KIF3C;SAC3D1;CLASP2;BBS2;DYNC1H1;PLK3;SNAPIN;NDE1;CEP152;PLK2;NEK7;WDR19;DNAH14;TUBB4B;CENPE;A…
cofactor metabolic process (GO:0051186)	46/255	0.000552776	0.161193	-2.29127	4.18192	LIPT2;SLC46A1;PANK3;ALAS1;ACSS2;HIBADH;SHMT1;TECR;AKR1B1;HMGCR;PDHB;PPOX;GPHN;ALAD;PNP;SPR;PMVK;FDXR;HMOX1;PDSS2;HMOX2;PCK2;MCCC2;VKORC1;CBR1;ACOT7;DGAT1;GCH1;ELOVL4;TPK1;AKR1C1;DCXR;MCCC1;SLC11A2;NMNAT3;ELOVL7;PGD;COQ5;QDPR;RPIA;COQ3;PCCA;PPT1;ACOT1;BLVRB;ADCK3
fat cell differentiation (GO:0045444)	23/96	0.00056621	0.161193	-2.11506	3.86031	BBS2;OSBPL8;TCF7L2;CEBPB;GPX1;LAMA4;BNIP3;ERAP1;EIF2AK3;ARID5B;ADRB2;NOC3L;PTGS2;SMAD6;FOXO1;AACS;ERO1L;RGS2;SOCS1;SNAI2;ITGA6;BBS7;PPARGC1A
branched-chain amino acid catabolic process (GO:0009083)	2016-09-19	0.000694852	0.163991	-2.53659	4.58601	MCCC2;AUH;HIBADH;IVD;MCCC1;DBT;BCKDHB;HIBCH;ACAT1
response to oxygen levels (GO:0070482)	46/259	0.000737926	0.163991	-2.46298	4.45291	CDKN1A;PRKAA1;EPAS1;SDC2;CHRNA7;UBE2D1;CXCR4;ITPR2;ADM;PLOD2;PLAT;PTGS2;NDRG1;THBS1;ETS1;FOXO1;ICAM1;SLC2A8;CTGF;LOXL2;PDLIM1;CST3;SCFD1;LMNA;UCP2;CASP1;CAPN2;HMOX1;PPARGC1A;HMOX2;NKX3-1;EDN1;EGLN3;BNIP3;SLC11A2;PGF;USF1;VASN;TGFBR3;NR4A2;CAT;ALDOC;ANGPTL4;ADA;PPARD;CPEB4
response to decreased oxygen levels (GO:0036293)	44/245	0.000780622	0.163991	-2.43532	4.40291	PRKAA1;EPAS1;SDC2;CHRNA7;ITPR2;UBE2D1;CXCR4;ADM;PLOD2;PLAT;PTGS2;NDRG1;THBS1;ETS1;SLC2A8;ICAM1;CTGF;LOXL2;CST3;PDLIM1;SCFD1;UCP2;LMNA;CAPN2;CASP1;HMOX1;PPARGC1A;HMOX2;NKX3-1;EDN1;EGLN3;BNIP3;SLC11A2;USF1;PGF;VASN;TGFBR3;NR4A2;CAT;ALDOC;ANGPTL4;ADA;CPEB4;PPARD
negative regulation of protein phosphorylation (GO:0001933)	46/260	0.000792055	0.163991	-2.4011	4.34105	CDKN1C;CDKN1A;GBA;DUSP19;HSPB1;HMGCR;PSEN1;PRKCZ;LRP6;RABGEF1;RGS2;HHEX;RGS3;DUSP10;SOCS1;DEPTOR;UBASH3B;SMPD1;INPP5J;SMYD3;SNX6;DUSP4;JUN;CDKN2B;CDKN2C;DUSP3;GADD45B;GADD45A;IGFBP3;SPRY4;PAQR3;SMAD6;DUSP6;DUSP22;DNAJC3;LATS1;MLXIPL;APC;TAOK3;PPAP2B;CNKSR3;DNAJC10;PTPN6;CALM1;TRIB1;ZNF675
protein folding (GO:0006457)	41/221	0.000667561	0.163991	-2.26559	4.09605	TOR2A;ERO1LB;FKBP14;FUT10;HSPA4L;TXNDC11;CLU;ERO1L;TUBB6;PRDX4;DNAJB4;QSOX1;UGGT2;MPDU1;SH3GLB1;EDEM3;MESDC2;UNC45A;TOR3A;PEX19;TOR1A;WFS1;VBP1;HSPA6;EDEM2;AIP;TBCC;TUBB4B;TOR1B;PDIA4;PDCL3;TMX4;TUBB2A;TMX1;RP2;DNAJC10;TBCE;PIGK;PDCL;ATF6;PPIC
cellular lipid catabolic process (GO:0044242)	28/131	0.000734792	0.163991	-2.10513	3.80595	ABCD3;ECHS1;HEXB;GBA;LPL;ABHD5;NEU3;GM2A;SCP2;SMPD1;CYP1B1;ACADS;DECR1;ACOT7;MMAA;PNPLA8;SRD5A3;NAGA;PLA2G4A;PLA2G15;AMACR;PCCA;EHHADH;PNPLA3;PPT1;NAPEPLD;SMPDL3A;PPARD
negative regulation of phosphorylation (GO:0042326)	54/325	0.00106671	0.20882	-2.42335	3.79566	CDKN1C;CDKN1A;DUSP19;HSPB1;RABGEF1;RGS2;HHEX;RGS3;DUSP10;DEPTOR;UBASH3B;SMPD1;DUSP4;DUSP3;IGFBP3;PAQR3;DUSP6;DUSP22;DNAJC3;LATS1;PPAP2B;CNKSR3;TRIB1;ZNF675;BIRC3;GBA;HMGCR;PSEN1;PRKCZ;FOXO1;LRP6;PRPSAP1;SLC9A3R1;SOCS1;INPP5J;SMYD3;SNX6;PTPN1;JUN;CDKN2B;ANKRD26;CDKN2C;GADD45B;GADD45A;SPRY4;SMAD6;PER1;MLXIPL;TAOK3;TNIP1;APC;DNAJC10;PTPN6;CALM1
microtubule organizing center organization (GO:0031023)	18/70	0.00110026	0.20882	-2.06698	3.23748	CEP68;BCAS3;CEP135;GADD45A;CEP152;NDE1;HAUS4;CCP110;GCC2;HAUS5;BRCA2;KIAA0101;CEP250;NEK2;SAC3D1;CNTLN;CDK5RAP2;CLASP2
cellular carbohydrate catabolic process (GO:0044275)	1931-11-01	0.00125618	0.215218	-2.42859	3.73057	GK5;ABHD10;MANBA;GK;PGM2;IDNK;PHKA1;PYGL;CALM1;GYG1;PHKA2
microtubule cytoskeleton organization (GO:0000226)	43/245	0.00132297	0.215218	-2.3278	3.57574	GPSM2;SPEF2;CNP;ULK4;CEP120;CASC5;GCC2;TPGS1;PRKCZ;AURKB;ATXN3;SPAST;RNF19A;KATNA1;LMNA;NEK2;FOPNL;SAC3D1;CDK5RAP2;CLASP2;BBS2;PLK3;DYNC1H1;GAS2L3;NDE1;PLK2;STARD9;NEK7;SPICE1;HAUS4;HAUS5;MID1;IFT88;ESPL1;APC;MAP7D3;TBCE;TUBGCP5;MYH9;KIF2C;KIZ;ZPR1;SPC25
response to oxidative stress (GO:0006979)	49/290	0.00130412	0.215218	-2.32253	3.56764	NDUFA12;OGG1;PTPRK;ETS1;CYP1B1;GPX1;ANXA1;SLC11A2;GAB1;VRK2;FOS;HBA1;ATRN;CAT;TXNIP;NDUFS2;PRKAA1;TMEM161A;EPAS1;PON2;XPA;PSEN1;PTGS2;CLN8;FOXO3;UACA;FOXO1;CST3;PDLIM1;CYP11A1;UCP2;HMOX1;PPARGC1A;HMOX2;MICB;PLK3;JUN;TOR1A;BNIP3;OXR1;ATOX1;KLF2;FOSL1;NET1;NR4A2;GCLC;SELK;ADA;MSRB1
cellular amino acid metabolic process (GO:0006520)	66/421	0.00121983	0.215218	-2.31946	3.56293	SLC46A1;ERO1LB;ACY1;HIBADH;ASNSD1;MTR;SQRDL;PEPD;YARS2;GLS;ERO1L;SPR;AUH;DBT;NARS2;SEPHS2;HIBCH;MCCC2;GSTK1;ARG2;GPX1;MCCC1;BCKDHB;PLA2G4A;DIO3;ASRGL1;GCAT;LARS2;PLA2G16;ETHE1;IVD;EEF1E1;ALDH7A1;PCYOX1;AARS2;OAT;TARSL2;SHMT1;SLC1A3;GSTT1;SDSL;BPHL;ACAT1;PDPR;PRDX4;ASL;ADSS;DTD2;GSTM4;EGLN3;GSTM1;GCH1;GOT1;GFPT2;MBOAT1;GGH;SUOX;QDPR;GCLC;P4HA1;GSTA4;ADI1;CTH;LPCAT3;SCLY;SERINC5
cellular amino acid catabolic process (GO:0009063)	25/117	0.00138114	0.216934	-2.13439	3.26169	HIBADH;SHMT1;SQRDL;GLS;ACAT1;PDPR;AUH;DBT;ASL;DTD2;HIBCH;MCCC2;GOT1;MCCC1;BCKDHB;DIO3;SUOX;ASRGL1;GCAT;QDPR;ETHE1;IVD;CTH;ALDH7A1;PCYOX1
alcohol biosynthetic process (GO:0046165)	23/104	0.00143088	0.217256	-2.15807	3.29468	IDI1;PRKAA1;GOT1;HMGCS1;INSIG1;GBA;PLA2G4A;HMGCR;SGMS2;HSD17B7;ACER2;SQLE;EBP;SPTLC2;SCP2;IMPA1;CYP11A1;ACER3;LPCAT2;CYP2R1;PMVK;DHCR7;LPIN3
response to hypoxia (GO:0001666)	42/241	0.00168122	0.225234	-2.39589	3.57135	PRKAA1;EPAS1;SDC2;CHRNA7;UBE2D1;CXCR4;ITPR2;ADM;PLOD2;PLAT;PTGS2;NDRG1;THBS1;ETS1;ICAM1;SLC2A8;LOXL2;PDLIM1;CST3;SCFD1;LMNA;UCP2;CASP1;CAPN2;HMOX1;PPARGC1A;HMOX2;NKX3-1;EDN1;EGLN3;BNIP3;SLC11A2;PGF;USF1;VASN;TGFBR3;NR4A2;CAT;ALDOC;ANGPTL4;ADA;PPARD
negative regulation of protein kinase activity (GO:0006469)	35/189	0.00163462	0.225234	-2.28775	3.41016	CDKN1C;CDKN1A;GBA;DUSP19;HSPB1;HMGCR;PSEN1;LRP6;HHEX;RGS2;SOCS1;DEPTOR;RGS3;DUSP10;UBASH3B;SMPD1;SMYD3;SNX6;DUSP4;CDKN2B;CDKN2C;DUSP3;GADD45B;GADD45A;SPRY4;PAQR3;DUSP6;DUSP22;DNAJC3;LATS1;APC;TAOK3;PTPN6;TRIB1;ZNF675
dephosphorylation (GO:0016311)	47/278	0.00160114	0.225234	-2.25373	3.35944	MTMR10;PFKFB4;MTMR3;PFKFB3;SMEK1;DUSP19;MTMR9;PPM1K;PTPRK;CDC14A;PTPRG;DUSP10;IMPA1;UBASH3B;ACP6;INPP5J;NT5M;BPNT1;BTRC;SBF2;CAMK2G;PPAPDC1B;DUSP4;PTPN1;DUSP3;STYX;PPP2R5D;BPGM;SYNJ2;PTPN13;CDC25C;CPPED1;DUSP6;CDC25B;DUSP22;NT5C3B;PPM1B;NCEH1;PDP2;G6PC3;PPP1R3C;PPAP2B;PTPN6;PHPT1;PTPN4;LPIN3;CDKN3
post-translational protein modification (GO:0043687)	38/211	0.001645	0.225234	-2.15221	3.20811	PIGS;GALNT11;PIGU;PGAP1;PIGT;DSCC1;EIF5A2;MPI;GCNT1;UAP1;MAGT1;MAN1A2;MAN2A1;ARSJ;MAN1A1;UGGT2;ST3GAL1;EDEM3;VKORC1;PMM1;ALG6;RHBDD1;GFPT2;SRD5A3;C1GALT1;EDEM2;ALG14;PLAUR;ALG1;ESCO2;ALG10;SUMF1;PIGA;PIGK;PIGM;ALG10B;B4GALT4;PIGH
protein oligomerization (GO:0051259)	58/366	0.00188945	0.245899	-2.24331	3.14699	TOR2A;IDE;GLS;THG1L;PANX1;ALAD;CASP8;TRIM5;DNM1L;SBF2;TRIM21;ACADS;SH3GLB1;DCXR;KCTD1;HBA1;KCNAB2;TERF1;GCHFR;OLFM1;AR;MED24;CLPP;CAT;ALDOC;ANGPTL4;MICU1;BIRC3;DGKH;BLM;PRKAA1;OAT;STXBP3;AHNAK;SHMT1;ATL2;NOD1;HMGCR;SAMHD1;PRKCZ;ACAT1;SLC9A1;SNX2;SPAST;PDSS2;HMOX1;CAMK2G;DECR1;VASP;TOR1A;MLKL;GCH1;AKR1C1;EIF2AK3;TOR1B;EHD4;P2RX4;CTH
membrane lipid catabolic process (GO:0046466)	2016-09-23	0.00200655	0.247023	-2.4938	3.48701	NEU3;GM2A;SMPD1;HEXB;GBA;PPT1;NAGA;CYP1B1;SMPDL3A
branched-chain amino acid metabolic process (GO:0009081)	2016-09-23	0.00200655	0.247023	-2.4041	3.36158	MCCC2;AUH;HIBADH;IVD;MCCC1;DBT;BCKDHB;HIBCH;ACAT1
dolichol-linked oligosaccharide biosynthetic process (GO:0006488)	1934-11-01	0.00229801	0.261686	-2.32942	3.12285	ALG6;PMM1;GFPT2;SRD5A3;MPI;ALG14;UAP1;ALG1;ALG10;ALG10B;MPDU1
response to topologically incorrect protein (GO:0035966)	28/143	0.00228705	0.261686	-2.15567	2.88992	FKBP14;HSPA4L;HSPB1;THBS1;CLU;ERO1L;ATXN3;DNAJB4;LMNA;MFN2;EDEM3;TSPYL2;PTPN1;TOR1A;HSPA5;WFS1;RHBDD1;HSPA6;EDEM2;EIF2AK3;PARP16;TOR1B;MANF;DNAJC3;DDIT3;CTH;ATF6;ATF3
cell redox homeostasis (GO:0045454)	16/63	0.00226126	0.261686	-2.01907	2.70679	GPX1;ERO1LB;TXNDC11;GLRX;TXNDC15;PDIA4;ERO1L;GCLC;TMX4;PRDX4;TMX1;DDIT3;DNAJC10;QSOX1;SH3BGRL3;SELT
organophosphate biosynthetic process (GO:0090407)	66/436	0.00260467	0.271451	-2.33407	3.04356	PI4K2B;PIGU;PANK3;HEXB;MPI;ADK;ADM;PYGL;GPHN;PNP;SCP2;SPTLC2;IMPA1;MB21D1;SH3GLB1;ACOT7;DGAT1;PLA2G4A;DCK;PLA2G16;RP2;PIGA;UPRT;PPARD;PIGH;PRPS2;IDI1;PRPS1;SLC26A2;DTYMK;MTMR3;SLC35D1;NPR1;AK1;UAP1;SGMS2;ABHD5;PIK3R1;PAPSS2;AGPAT4;PAPSS1;PRPSAP1;PRPSAP2;PMVK;INPP5J;ADSS;PMM1;GK;GCH1;TPK1;PNPLA8;GFPT2;SRD5A3;MBOAT1;NMNAT3;SYNJ2;DHODH;IMPDH1;LPCAT3;ETNK1;LPCAT2;PNPLA3;GNAS;LPIN3;SERINC5;ADA
wound healing, spreading of cells (GO:0044319)	2016-07-15	0.00292543	0.271451	-2.30908	3.01098	TOR1A;COL5A1;MSX2;ITGA5;CYR61;ARHGAP24;HBEGF
negative regulation of kinase activity (GO:0033673)	36/202	0.00250365	0.271451	-2.28354	2.97768	CDKN1C;CDKN1A;GBA;DUSP19;HSPB1;HMGCR;PSEN1;LRP6;PRPSAP1;RGS2;HHEX;RGS3;DUSP10;SOCS1;DEPTOR;UBASH3B;SMPD1;SMYD3;SNX6;DUSP4;CDKN2B;CDKN2C;DUSP3;GADD45B;GADD45A;SPRY4;PAQR3;DUSP6;DUSP22;DNAJC3;LATS1;APC;TAOK3;PTPN6;TRIB1;ZNF675
mitotic cell cycle (GO:0000278)	62/404	0.00262077	0.271451	-2.20206	2.87143	CDKN1A;ERCC6L;CEP164;UBE2D1;CASC5;CCP110;MCM10;PSMD8;SGOL2;CEP250;NEK2;BTRC;NINL;CDK5RAP2;SKP1;CEP135;ESCO2;CDC25C;CDC25B;RBL2;RBL1;ESPL1;CCNE2;TFDP2;GORASP2;AKAP9;ANAPC4;ANAPC5;KIF2C;PPP1R12B;SFI1;MAD1L1;MCM2;PRIM2;LIN37;RNF2;AURKB;CENPC;CCNB2;CEP70;LMNA;CEP78;CLASP2;PLK3;DYNC1H1;GINS2;CDKN2B;CDKN2C;NDE1;CEP152;GINS4;RPA2;TUBB4B;ZWINT;CENPE;POLE2;ALMS1;TUBGCP5;NUP35;PTPN6;SPC24;SPC25
natural killer cell mediated immunity (GO:0002228)	2016-07-15	0.00292543	0.271451	-2.16312	2.82065	RAET1G;PTPN6;TUBB4B;ULBP1;LYST;MICA;ULBP3
natural killer cell mediated cytotoxicity (GO:0042267)	2016-07-15	0.00292543	0.271451	-2.15827	2.81433	RAET1G;PTPN6;TUBB4B;LYST;ULBP1;MICA;ULBP3
negative regulation of protein serine/threonine kinase activity (GO:0071901)	24/118	0.00297971	0.271451	-2.0974	2.73495	CDKN1C;DUSP4;CDKN2B;CDKN1A;CDKN2C;DUSP3;GBA;SPRY4;PAQR3;DUSP19;HSPB1;HMGCR;DUSP6;LRP6;DUSP22;LATS1;HHEX;RGS2;RGS3;DUSP10;APC;SMPD1;PTPN6;ZNF675
protein N-linked glycosylation (GO:0006487)	22/104	0.00288769	0.271451	-2.08664	2.72092	EDEM3;PMM1;ALG6;CCDC126;GFPT2;MPI;SRD5A3;EDEM2;ALG14;UAP1;ALG1;MAGT1;ALG10;UBE2J1;MAN1A2;MAN2A1;MAN1A1;UGGT2;B4GALT7;ALG10B;ST3GAL1;B4GALT4
type I interferon signaling pathway (GO:0060337)	16/65	0.00295138	0.271451	-2.02178	2.63635	IFNAR2;PTPN1;IFITM1;STAT2;IFI6;HLA-C;HLA-A;TYK2;IFI35;USP18;HLA-E;OASL;ISG20;SOCS1;IRF1;PTPN6
cellular response to type I interferon (GO:0071357)	16/65	0.00295138	0.271451	-2.01806	2.6315	IFNAR2;PTPN1;IFITM1;STAT2;IFI6;HLA-C;TYK2;IFI35;HLA-A;USP18;OASL;HLA-E;ISG20;SOCS1;IRF1;PTPN6
regulation of protein serine/threonine kinase activity (GO:0071900)	63/416	0.00318775	0.28471	-2.2746	2.85755	CDKN1C;CDKN1A;DUSP19;HSPB1;RGS2;HHEX;DUSP10;RGS3;SMPD1;MAP3K6;MAP3K4;MAP2K3;DUSP4;EDN1;DUSP3;RIPK2;PAQR3;GAB1;CDC25C;DUSP6;DUSP22;LATS1;MDFIC;CCNE2;TRIB1;ZNF675;CCNO;BLM;PRKAA1;CHRNA7;GBA;CXCR4;TGFA;NOD1;HMGCR;MST1R;PSEN1;THBS1;LRP6;CCNB2;SERTAD1;IRAK2;S1PR2;CDKN2B;MAP3K1;CDKN2C;GADD45B;GADD45A;EGF;FAM58A;SPRY4;ATP2B4;PARP16;DAB2;KITLG;TAOK3;APC;CCNYL1;PTPN6;CSPG4;TAB1;CALM1;CDKN3
response to type I interferon (GO:0034340)	16/66	0.00335681	0.294044	-2.01535	2.46685	IFNAR2;PTPN1;IFITM1;STAT2;IFI6;HLA-C;TYK2;IFI35;HLA-A;USP18;OASL;HLA-E;ISG20;SOCS1;IRF1;PTPN6
regulation of lipid biosynthetic process (GO:0046890)	23/113	0.00356832	0.306674	-2.17063	2.56563	SCARB1;TCF7L2;PRKAB2;PRKAA1;ANXA1;VDR;INSIG1;CREBL2;FITM2;SORBS1;NR1D1;PTGS2;CYR61;BMP5;SEC14L2;MLXIPL;POR;SNAI1;PDK4;SNAI2;DHCR7;WDTC1;PLIN5
sphingolipid catabolic process (GO:0030149)	2016-08-21	0.004031	0.327878	-2.33126	2.59962	NEU3;GM2A;SMPD1;HEXB;GBA;PPT1;NAGA;SMPDL3A
regulation of fat cell differentiation (GO:0045598)	19/87	0.00400985	0.327878	-2.16624	2.4156	TCF7L2;CEBPB;ANKRD26;JAG1;MSX2;INSIG1;CREBL2;NR1D1;PTGS2;FOXO1;LRP6;IFT88;CCDC85B;ASXL2;TAF8;SNAI2;HES1;CCRN4L;PPARD
leukocyte mediated cytotoxicity (GO:0001909)	2016-09-26	0.00391581	0.327878	-2.13166	2.37704	CADM1;RAET1G;PTPN6;TUBB4B;LYST;ULBP1;MICA;CTSC;ULBP3
cellular carbohydrate metabolic process (GO:0044262)	30/165	0.00425834	0.340294	-2.11581	2.28073	PFKFB4;CMAS;PFKFB3;TP53RK;PYGL;SLC5A3;GK5;ABHD10;IMPA1;PGM2;NANS;GYG1;XYLB;TCF7L2;MANBA;GOT1;GK;PHKA1;ALG1;NR1D1;PGD;PHKA2;PGM2L1;EXT1;COQ3;PPP1R3C;PPP1R3E;IDNK;CALM1;GALK2
response to extracellular stimulus (GO:0009991)	49/313	0.00499744	0.340907	-2.29418	2.46887	CDKN1A;BMPR2;OGG1;ADM;AACS;ICAM1;PDK4;PITX2;ACADS;CCRN4L;GPX1;HMGCS1;BCKDHB;RNASE4;FOS;POR;DDIT3;CAT;ITGA6;PPARD;PRKAA1;CHRNA7;HMGCR;PTGS2;ADIPOR2;FOXO1;ACAT1;LRP6;GNAI2;CST3;NUAK2;CYP11A1;UCP2;HMOX1;PPARGC1A;SLC25A25;ABCA1;TCF7L2;JUN;CDKN2B;HSPA5;VDR;USF1;DHODH;FOSL1;NR4A2;ATG2A;ADA;CPEB4
negative regulation of intracellular signal transduction (GO:1902532)	53/345	0.00504363	0.340907	-2.27755	2.45097	DUSP19;HSPB1;CLU;RABGEF1;RGS2;RGS3;DUSP10;CASP8;DEPTOR;SMPD1;DUSP4;GPX1;DUSP3;PAQR3;DUSP6;DUSP22;PPM1B;CNKSR3;TBC1D7;TRIM59;ZNF675;CD44;EPHA2;PRKAA1;TMEM161A;GBA;HMGCR;UACA;THBS1;FOXO1;SLC9A3R1;SOCS1;PRKCDBP;MFN2;TAF9B;SAC3D1;PTPN1;ANKRD26;WFS1;TNK1;SPRY4;ATP2B4;C9ORF89;ARHGAP24;PER1;TAOK3;TNIP1;BCL6;APC;SNAI1;SNAI2;PTPN6;NFKBID
C-terminal protein lipidation (GO:0006501)	2016-09-27	0.00479736	0.340907	-2.25197	2.42344	PIGS;PIGU;PGAP1;PIGT;PIGA;PLAUR;PIGK;PIGM;PIGH
monocarboxylic acid metabolic process (GO:0032787)	69/473	0.00464068	0.340907	-2.20824	2.37638	ABCD3;ERO1LB;TECR;ALKBH7;AACS;ERO1L;FADS3;SCP2;MPC1;PDK4;CYP1B1;ACADS;MCCC2;CBR1;PRKAB2;EDN1;ACOT7;GPX1;EDN2;ELOVL4;MCCC1;PLA2G4A;PPP2R5D;BPGM;ELOVL7;PGD;PLA2G15;ALDH1A3;POR;PCCA;EHHADH;ACOT1;ALDOC;IDNK;SLC27A3;PPARD;PTGES;LIPT2;PRKAA1;PFKFB4;ECHS1;ACSS2;PFKFB3;SLC35D1;SHMT1;SLC1A3;LPL;PDHB;ABHD5;PTGS2;ADIPOR2;PRDX4;PDPR;THEM4;LTA4H;PPARGC1A;PCK2;DECR1;EGLN3;MMAA;PNPLA8;AKR1C1;SCD5;ACSF2;AMACR;PD…
regulation of sequence-specific DNA binding transcription factor activity (GO:0051090)	52/338	0.0053041	0.340907	-2.20674	2.37478	CLU;ICAM1;RPS6KA5;TRIM5;CYP1B1;ERC1;BTRC;TRIM21;MSX2;RIPK2;ANXA4;ARID5B;COMMD1;FOS;COMMD6;TGFBR3;SIGIRR;AR;BRMS1;PPAP2B;DDIT3;CAT;PELI1;TRIM14;SGK3;TRIM15;SGK1;TRIB1;ZNF675;NOD1;PRKCZ;LRP6;IRAK2;HMOX1;PPARGC1A;FZD1;TCF7L2;JUN;RWDD3;TAF12;WFS1;ESR2;FOSL1;CTH;ID1;ID3;TRIM38;TAB1;RHEBL1;NFKBID;TAF3;MYD88
cell cycle phase transition (GO:0044770)	45/280	0.00458883	0.340907	-2.18282	2.34903	PRIM2;CDKN1A;LIN37;CEP164;CCP110;MCM10;PSMD8;CCNB2;CEP70;CEP250;NEK2;PIM2;BTRC;CAMK2G;NINL;CEP78;CDK5RAP2;SKP1;PLK3;DYNC1H1;CDKN2B;TIPIN;CDKN2C;CEP135;NDE1;PLK2;CEP152;RPA2;TERF1;TUBB4B;CDC25C;CDC25B;LATS1;APC;CCNE2;POLE2;ALMS1;AKAP9;TUBGCP5;PPP1R12B;SFI1;NES;TAF2;MCM2;CDKN3
gland development (GO:0048732)	37/220	0.00510712	0.340907	-2.18085	2.34692	CDKN1C;RARG;SIX1;AHR;PSEN1;ETS1;AACS;ACAT1;CST3;CCNB2;HHEX;BCL2L11;MAN2A1;UCP2;HES1;JARID2;HOXA5;NKX3-1;TCF7L2;JUN;TFAP2C;CDKN2B;HMGCS1;CADM1;LMO4;ARID5B;LSR;TBX3;RUNX1;TGFBR3;QDPR;AR;IFT88;MAFB;APC;HOXD9;ADA
organic hydroxy compound biosynthetic process (GO:1901617)	30/166	0.00459207	0.340907	-2.14459	2.30789	IDI1;PRKAA1;SHMT1;INSIG1;CHRNA7;GBA;SGMS2;HMGCR;HSD17B7;EBP;SPTLC2;SCP2;IMPA1;CYP11A1;CYP2R1;PMVK;PLTP;GPR37;GOT1;GCH1;HMGCS1;PLA2G4A;ACER2;NR4A2;SQLE;AMACR;ACER3;LPCAT2;DHCR7;LPIN3
cell morphogenesis (GO:0000902)	35/204	0.00483932	0.340907	-2.13834	2.30116	CLIC4;SLC1A3;CLU;LRP6;LOXL2;SCFD1;SPR;ARL13B;MICALL2;ITGAV;HES1;CAP2;MAP3K1;TBCCD1;CADM1;MSX2;VDR;TBCC;PARVA;SHROOM1;KLF2;TGFBR3;IFT88;DAB2;BIN3;RILPL2;BCL6;RP2;ID1;SNAI1;SNAI2;MYH9;S100A4;FERMT2;EPHA2
cell projection assembly (GO:0030031)	36/213	0.00531381	0.340907	-2.12952	2.29168	SPEF2;CEP164;FBF1;TPGS1;TTBK2;RPGR;DYNC2LI1;SDCBP;SLC9A3R1;ABLIM1;ARL13B;OPHN1;MCIDAS;KIF3A;TCTN2;TMEM107;DZIP1L;FOPNL;BBS7;MYH10;RAB8B;VAV3;BBS2;IFT140;WDR19;CD2AP;CCDC88A;IFT88;KLF5;BBS10;TMEM216;TTC30A;SPATA13;ITGA6;CCNO;VCL
alpha-amino acid metabolic process (GO:1901605)	36/213	0.00531381	0.340907	-2.10957	2.27021	SLC46A1;OAT;ERO1LB;HIBADH;ASNSD1;SHMT1;SLC1A3;MTR;GLS;ERO1L;PDPR;PRDX4;SPR;AUH;ASL;ADSS;SEPHS2;DTD2;HIBCH;MCCC2;EGLN3;ARG2;GOT1;GCH1;GFPT2;MCCC1;GGH;ASRGL1;GCAT;QDPR;GCLC;P4HA1;ADI1;CTH;IVD;ALDH7A1
response to endoplasmic reticulum stress (GO:0034976)	27/145	0.00491521	0.340907	-2.10045	2.26039	CEBPB;FKBP14;SEL1L;TXNDC11;THBS1;ERO1L;BCL2L11;OS9;LMNA;TSPYL2;PTPN1;JUN;HSPA5;WFS1;ATG10;EIF2AK3;PARP16;PDIA4;DNAJC3;TMX4;TMX1;CTH;DDIT3;DNAJC10;SELK;ATF6;ATF3
response to UV (GO:0009411)	23/117	0.00515222	0.340907	-2.07508	2.23309	USP47;CDKN1A;PRKAA1;TIPIN;TMEM161A;GPX1;RHBDD1;ACTR5;XPA;HUS1;PIK3R1;GTF2H2;PTPRK;PTGS2;BRCA2;UACA;CRIP1;USF1;AURKB;KIAA0101;MSH2;CAT;MAP3K4
mitotic cell cycle checkpoint (GO:0007093)	21/103	0.00512592	0.340907	-2.02746	2.18185	PLK3;CDKN2B;BLM;TIPIN;PLK2;UBE2D1;HUS1;RPA2;TERF1;ZWINT;AURKB;APC;TAOK3;MSH2;CHMP4C;NABP1;ANAPC4;ANAPC5;NBN;MAD1L1;RAD9A
centrosome organization (GO:0051297)	15/64	0.00577793	0.365535	-1.87827	1.89028	CEP68;CEP135;GADD45A;CEP152;NDE1;HAUS4;CCP110;HAUS5;BRCA2;KIAA0101;CEP250;NEK2;SAC3D1;CNTLN;CDK5RAP2
mitotic cell cycle phase transition (GO:0044772)	44/277	0.00602436	0.370824	-2.14472	2.12762	PRIM2;CDKN1A;LIN37;CEP164;CCP110;MCM10;PSMD8;CCNB2;CEP70;CEP250;NEK2;PIM2;BTRC;CAMK2G;NINL;CEP78;CDK5RAP2;SKP1;PLK3;DYNC1H1;CDKN2B;CDKN2C;CEP135;NDE1;PLK2;CEP152;RPA2;TERF1;TUBB4B;CDC25C;CDC25B;LATS1;APC;CCNE2;POLE2;ALMS1;AKAP9;TUBGCP5;PPP1R12B;SFI1;NES;TAF2;MCM2;CDKN3
negative regulation of multi-organism process (GO:0043901)	25/133	0.00598535	0.370824	-1.99881	1.98288	IFITM1;ZC3HAV1;PRDM1;OASL;PRDX4;TRIM5;ITGAV;TIMP1;TRIM21;MICB;SRPK2;APOBEC3C;JUN;SIGIRR;ISG20;PPM1B;TNIP1;SLPI;TRIM14;TRIM15;TRIM59;TRIM38;TRIB1;MYD88;ADA
cellular response to external stimulus (GO:0071496)	32/185	0.00617302	0.370904	-2.16997	2.1522	PTGER4;CDKN1A;PRKAA1;BMPR2;PTGS2;FOXO1;ICAM1;NUAK2;CASP8;UCP2;PDK4;CASP1;HMOX1;TCF7L2;CDKN2B;JUN;MAP3K1;HSPA5;CRADD;GADD45A;VDR;BNIP3;RNASE4;FOS;USF1;FOSL1;NR4A2;IRF1;ATG2A;ITGA6;MYD88;CPEB4
purine nucleobase metabolic process (GO:0006144)	1940-11-01	0.00643191	0.370904	-2.08939	2.07228	PRPS1;PNP;GPX1;IMPDH1;GDA;SHMT1;CAT;ADK;ADSS;DCK;ADA
cholesterol biosynthetic process (GO:0006695)	1934-10-01	0.00625654	0.370904	-2.03364	2.01698	IDI1;SQLE;PRKAA1;EBP;HMGCS1;INSIG1;PMVK;DHCR7;HMGCR;HSD17B7
bone development (GO:0060348)	1940-11-01	0.00643191	0.370904	-1.9769	1.96071	PTGER4;VKORC1;AMER1;PRPSAP2;CADM1;GNAS;TULP3;PLS3;BBX;PAPSS2;TRIM45
toll-like receptor 5 signaling pathway (GO:0034146)	15/65	0.00651424	0.370904	-1.89483	1.87931	DUSP4;MAP2K3;JUN;MAP3K1;DUSP3;RIPK2;PPP2R5D;NOD1;FOS;DUSP6;RPS6KA5;IRAK2;PELI1;TAB1;MYD88
toll-like receptor 10 signaling pathway (GO:0034166)	15/65	0.00651424	0.370904	-1.89148	1.87599	MAP2K3;DUSP4;JUN;MAP3K1;DUSP3;RIPK2;PPP2R5D;NOD1;FOS;DUSP6;RPS6KA5;IRAK2;PELI1;TAB1;MYD88
quinone metabolic process (GO:1901661)	2016-09-29	0.00701558	0.376747	-2.13696	2.08606	VKORC1;CBR1;COQ3;AKR1C1;PDSS2;AKR1B1;ADCK3;HMGCR;COQ5
vesicle docking involved in exocytosis (GO:0006904)	2016-09-29	0.00701558	0.376747	-2.03002	1.98167	UNC13B;SCFD1;BLOC1S6;STXBP3;SCFD2;VPS33A;STXBP1;EXOC4;EXOC6B
response to unfolded protein (GO:0006986)	25/135	0.00703178	0.376747	-2.01763	1.96957	FKBP14;HSPA4L;HSPB1;THBS1;ERO1L;DNAJB4;LMNA;MFN2;EDEM3;TSPYL2;PTPN1;HSPA5;WFS1;RHBDD1;HSPA6;EDEM2;EIF2AK3;PARP16;TOR1B;MANF;DNAJC3;DDIT3;CTH;ATF6;ATF3
multicellular organism growth (GO:0035264)	17/79	0.00711312	0.376747	-2.00158	1.95391	CDKN1C;TCF7L2;STIL;RARG;CLIC4;WDR48;NCOA3;XPA;ARID5B;KLF2;HHEX;SELM;GNAS;DHCR7;SLC25A25;HOXA5;WDTC1
protein maturation by protein folding (GO:0022417)	2016-05-09	0.00682365	0.376747	-0.790159	0.771338	PRDX4;ERO1LB;WFS1;AIP;ERO1L
Notch signaling involved in heart development (GO:0061314)	2016-05-09	0.00682365	0.376747	-0.767972	0.74968	NOTCH2;DLL4;GALNT11;JAG1;SNAI1
polyol biosynthetic process (GO:0046173)	2016-08-24	0.00768823	0.391367	-2.21067	2.07385	ACER2;SCP2;IMPA1;SPTLC2;GOT1;GBA;CYP2R1;ACER3
sulfur compound metabolic process (GO:0006790)	48/314	0.0079536	0.391367	-2.11032	1.97971	LIPT2;SLC26A2;ACSS2;SLC35D1;SDC4;SDC2;HEXB;TECR;GSTT1;MTR;SQRDL;PDHB;GNS;PAPSS2;PAPSS1;SULT1A1;PMVK;IDS;BPNT1;ST3GAL1;SLC19A2;MCCC2;GSTM4;GSTK1;ACOT7;GPX1;GSTM1;DGAT1;GOT1;ELOVL4;TPK1;MCCC1;MAMDC2;ELOVL7;SUOX;EXT1;TPST1;GCLC;PCCA;GSTA4;ADI1;CTH;ETHE1;ACOT1;CSPG4;B4GALT7;B4GALT4;PCYOX1
negative regulation of locomotion (GO:0040013)	34/204	0.00792925	0.391367	-2.07768	1.94909	PTGER4;IFITM1;CLIC4;C5AR2;ABHD2;SERPINE1;MIA3;PTPRK;THBS1;ROBO1;PTPRG;DLL4;RABGEF1;SLC9A3R1;TRIM5;HMOX1;CYP1B1;ITGAV;TIMP1;RNF20;OSBPL8;IGFBP5;IGFBP3;ARRDC3;AP1AR;BMP5;TGFBR3;OLFM1;RAP2B;TRIM59;TRIB1;ADA;VCL;PPARD
toll-like receptor signaling pathway (GO:0002224)	23/122	0.00791083	0.391367	-2.00155	1.87767	DUSP4;MAP2K3;JUN;MAP3K1;DUSP3;RIPK2;UBE2D1;PPP2R5D;NOD1;FOS;DUSP6;RPS6KA5;CASP8;TNIP1;IRAK2;CTSL;PELI1;TAB1;IKBKE;MYD88;CTSB;LGMN;BIRC3
steroid biosynthetic process (GO:0006694)	21/108	0.0081008	0.391367	-1.98751	1.8645	IDI1;SCARB1;PRKAA1;STARD5;HMGCS1;INSIG1;SRD5A3;AKR1B1;ADM;HMGCR;HSD17B11;HSD17B7;SQLE;EBP;AMACR;SCP2;CYP11A1;CYP2R1;PMVK;FDXR;DHCR7
deoxyribose phosphate catabolic process (GO:0046386)	2016-07-19	0.00811337	0.391367	-1.95781	1.83664	OGG1;PGM2;NT5M;NUDT15;SAMHD1;ADA;CCNO
protein homotetramerization (GO:0051289)	13/54	0.00816244	0.391367	-1.75241	1.64395	VASP;DCXR;SHMT1;IDE;SAMHD1;GLS;THG1L;CTH;CAT;ALDOC;DNM1L;ACADS;DECR1
nitric oxide biosynthetic process (GO:0006809)	2016-06-14	0.00799672	0.391367	-1.75198	1.64354	GCHFR;ARG2;P2RX4;SPR;GCH1;CYP1B1
pentose metabolic process (GO:0019321)	2016-06-14	0.00799672	0.391367	-1.53182	1.43701	RPIA;DCXR;OTOG;DHDH;PGD;XYLB
negative regulation of MAPK cascade (GO:0043409)	24/130	0.00841607	0.399325	-2.04782	1.87985	DUSP4;PTPN1;ANKRD26;DUSP3;GBA;SPRY4;PAQR3;DUSP19;HMGCR;DUSP6;FOXO1;DUSP22;PER1;SLC9A3R1;RGS2;RGS3;DUSP10;APC;TAOK3;TNIP1;SMPD1;CNKSR3;PTPN6;ZNF675
negative regulation of transferase activity (GO:0051348)	44/284	0.00878809	0.404341	-2.19043	1.98342	CDKN1C;PIF1;CDKN1A;GBA;DUSP19;UBE2D1;HSPB1;HMGCR;PSEN1;CLN8;LRP6;PRPSAP1;PSMD8;RGS2;HHEX;RGS3;DUSP10;SOCS1;DEPTOR;UBASH3B;SMPD1;SMYD3;SNX6;DUSP4;CDKN2B;CDKN2C;DUSP3;GADD45B;GADD45A;SPRY4;PAQR3;TERF1;DUSP6;DUSP22;DNAJC3;LATS1;APC;TAOK3;ANAPC4;ANAPC5;PTPN6;PHPT1;TRIB1;ZNF675
alcohol metabolic process (GO:0006066)	51/340	0.00870444	0.404341	-2.10883	1.90954	SCARB1;NUDT3;SPTLC2;IMPA1;SCP2;SMPD1;CYP2R1;FDXR;CYP1B1;DGAT1;HMGCS1;PLA2G4A;SREBF2;PLA2G15;ALDH1A3;PLA2G16;CAT;SMPDL3A;ALDH7A1;PPARD;IDI1;PRKAA1;ACSS2;INSIG1;GBA;HMGCR;SGMS2;HSD17B7;CLN8;SLC5A3;GK5;EBP;CYP11A1;PMVK;INPP5J;ABCA1;GK;GOT1;PNPLA8;SRD5A3;MBOAT1;ACER2;SQLE;COQ3;LPCAT3;ACER3;LPCAT2;DHCR7;CALM1;LPIN3;LGMN
cellular polysaccharide metabolic process (GO:0044264)	17/81	0.0087474	0.404341	-1.9304	1.74797	TCF7L2;MANBA;CMAS;TP53RK;PHKA1;PYGL;ALG1;NR1D1;PHKA2;PGM2L1;EXT1;PPP1R3C;PPP1R3E;PGM2;NANS;CALM1;GYG1
regulation of innate immune response (GO:0045088)	40/254	0.00962575	0.420381	-2.13108	1.84678	UBE2D1;NOD1;SAMHD1;USP18;RPS6KA5;DUSP10;CASP8;SOCS1;IRAK2;CTSL;TRIM5;IKBKE;CTSB;MB21D1;IFNAR2;MAP2K3;DUSP4;PTPN1;JUN;MAP3K1;DUSP3;CADM1;RIPK2;STAT2;ERAP1;PPP2R5D;TYK2;FOS;HLA-A;DUSP6;HLA-E;PIAS1;TNIP1;IRF1;PELI1;PTPN6;TAB1;MYD88;LGMN;BIRC3
fatty acid metabolic process (GO:0006631)	43/280	0.0107979	0.420381	-2.06013	1.7853	LIPT2;PRKAA1;ABCD3;ACSS2;ECHS1;TECR;LPL;ABHD5;PTGS2;ALKBH7;ADIPOR2;AACS;FADS3;SCP2;THEM4;CYP1B1;LTA4H;ACADS;PPARGC1A;DECR1;CBR1;PRKAB2;EDN1;ACOT7;GPX1;EDN2;ELOVL4;MMAA;PNPLA8;SCD5;PLA2G4A;ELOVL7;ACSF2;PLA2G15;POR;AMACR;PCCA;EHHADH;ACOT1;SLC27A3;LPIN3;PPARD;PTGES
membrane lipid metabolic process (GO:0006643)	28/162	0.0100352	0.420381	-2.05893	1.78426	PIGU;PGAP1;HEXB;GBA;SGMS2;CLN8;NEU3;SPTLC2;GM2A;SPTLC3;SMPD1;ARSJ;NEU1;CYP1B1;CERS6;NAGA;TEX2;SUMF1;PLA2G15;ACER2;PPAP2B;PIGA;ACER3;PPT1;SMPDL3A;SERINC5;B4GALT4;PIGH
regulation of cellular protein catabolic process (GO:1903362)	27/155	0.0103967	0.420381	-2.04987	1.77641	ARAF;UBE2D1;PSEN1;CLU;OPHN1;BBS7;BTRC;CTSC;PLK3;GPX1;UQCC2;EGF;PLK2;COMMD1;TERF1;SVIP;PIAS1;PDCL3;CENPE;GCLC;DAB2;ESPL1;APC;ANAPC4;ANAPC5;TRIB1;MAD1L1
cardiac septum morphogenesis (GO:0060411)	1943-11-01	0.00999689	0.420381	-2.02507	1.75492	NOTCH2;IFT88;JAG1;MSX2;PARVA;HES1;PITX2;TBX3;SOX4;CYR61;SAV1
regulation of proteolysis involved in cellular protein catabolic process (GO:1903050)	26/148	0.0107551	0.420381	-2.02333	1.75341	ARAF;UBE2D1;PSEN1;CLU;OPHN1;BBS7;BTRC;CTSC;PLK3;GPX1;EGF;PLK2;COMMD1;TERF1;SVIP;PIAS1;PDCL3;CENPE;DAB2;GCLC;ESPL1;APC;ANAPC4;ANAPC5;TRIB1;MAD1L1
negative regulation of cell motility (GO:2000146)	29/170	0.0103465	0.420381	-2.02106	1.75144	PTGER4;IFITM1;CLIC4;C5AR2;ABHD2;SERPINE1;MIA3;PTPRK;THBS1;PTPRG;DLL4;RABGEF1;SLC9A3R1;CYP1B1;HMOX1;TIMP1;RNF20;OSBPL8;IGFBP5;IGFBP3;AP1AR;BMP5;TGFBR3;OLFM1;RAP2B;TRIB1;ADA;VCL;PPARD
cell cycle arrest (GO:0007050)	25/140	0.0103193	0.420381	-1.99733	1.73087	CDKN1C;NOTCH2;CDKN1A;PRKAA1;AK1;THBS1;RASSF1;PLAGL1;MFN2;APBB2;NBN;NKX3-1;TCF7L2;CDKN2B;PRKAB2;GAS2L3;CDKN2C;GADD45A;APC;MSH2;IRF1;DDIT3;HBP1;EIF4G2;CDKN3
cilium assembly (GO:0042384)	22/118	0.0102926	0.420381	-1.96884	1.70619	BBS2;IFT140;CEP164;WDR19;FBF1;RPGR;TTBK2;DYNC2LI1;ABLIM1;BBS10;ARL13B;MCIDAS;KIF3A;TCTN2;TMEM216;TTC30A;TMEM107;DZIP1L;FOPNL;BBS7;CCNO;RAB8B
protein N-linked glycosylation via asparagine (GO:0018279)	19/96	0.00977815	0.420381	-1.92028	1.66411	EDEM3;PMM1;ALG6;GFPT2;MPI;SRD5A3;EDEM2;ALG14;UAP1;ALG1;MAGT1;ALG10;UBE2J1;MAN1A2;MAN2A1;MAN1A1;UGGT2;ALG10B;B4GALT4
peptidyl-asparagine modification (GO:0018196)	19/97	0.0107023	0.420381	-1.89165	1.63929	EDEM3;PMM1;ALG6;GFPT2;SRD5A3;EDEM2;MPI;ALG14;UAP1;MAGT1;ALG1;ALG10;UBE2J1;MAN1A2;MAN2A1;MAN1A1;UGGT2;ALG10B;B4GALT4
toll-like receptor 4 signaling pathway (GO:0034142)	19/97	0.0107023	0.420381	-1.87811	1.62756	DUSP4;MAP2K3;JUN;MAP3K1;DUSP3;RIPK2;UBE2D1;PPP2R5D;NOD1;FOS;DUSP6;RPS6KA5;CASP8;IRAK2;PELI1;TAB1;IKBKE;MYD88;BIRC3
'de novo' posttranslational protein folding (GO:0051084)	1949-12-01	0.00968555	0.420381	-1.87387	1.62389	SH3GLB1;TOR3A;TUBB6;TOR2A;TOR1A;TUBB2A;VBP1;TBCE;TBCC;TOR1B;TUBB4B;ERO1L
TRIF-dependent toll-like receptor signaling pathway (GO:0035666)	16/76	0.0105153	0.420381	-1.84398	1.59798	DUSP4;MAP2K3;JUN;DUSP3;RIPK2;UBE2D1;NOD1;PPP2R5D;FOS;DUSP6;RPS6KA5;CASP8;IRAK2;TAB1;IKBKE;BIRC3
cellular polysaccharide catabolic process (GO:0044247)	2016-07-20	0.01009	0.420381	-1.81151	1.56984	MANBA;PGM2;PHKA1;PYGL;CALM1;PHKA2;GYG1
galactose metabolic process (GO:0006012)	2016-06-15	0.0103287	0.420381	-1.51777	1.31529	GALT;PGM2;GALM;PPARGC1A;PGM2L1;GALK2
ER overload response (GO:0006983)	2016-05-10	0.0094609	0.420381	-0.710561	0.615769	HSPA5;WFS1;DDIT3;ATG10;EIF2AK3
wound healing, spreading of epidermal cells (GO:0035313)	2016-05-10	0.0094609	0.420381	-0.660046	0.571993	COL5A1;MSX2;ITGA5;ARHGAP24;HBEGF
negative regulation of sequence-specific DNA binding transcription factor activity (GO:0043433)	23/126	0.0108985	0.420701	-1.92532	1.667	TCF7L2;RWDD3;MSX2;WFS1;ANXA4;COMMD1;COMMD6;SIGIRR;BRMS1;IRAK2;DDIT3;CAT;ID1;PELI1;HMOX1;CYP1B1;ID3;TRIB1;BTRC;TRIM21;ZNF675;NFKBID;TAF3
cellular response to extracellular stimulus (GO:0031668)	22/119	0.0111549	0.426979	-1.96914	1.67578	TCF7L2;CDKN2B;JUN;CDKN1A;PRKAA1;BMPR2;HSPA5;VDR;RNASE4;FOS;USF1;FOXO1;ICAM1;FOSL1;NR4A2;NUAK2;UCP2;ATG2A;PDK4;HMOX1;ITGA6;CPEB4
brown fat cell differentiation (GO:0050873)	1932-09-01	0.0117131	0.42898	-1.96797	1.66558	CEBPB;RGS2;LAMA4;BNIP3;ITGA6;ADRB2;PTGS2;PPARGC1A;ERO1L
cofactor biosynthetic process (GO:0051188)	23/127	0.0117722	0.42898	-1.92355	1.62799	LIPT2;ALAS1;ACSS2;ACOT7;PANK3;GCH1;ELOVL4;TPK1;TECR;SLC11A2;NMNAT3;PDHB;ELOVL7;PPOX;GPHN;COQ5;ALAD;QDPR;COQ3;PNP;SPR;PDSS2;ADCK3
coenzyme biosynthetic process (GO:0009108)	19/98	0.0116948	0.42898	-1.87286	1.58509	LIPT2;ACOT7;PANK3;ACSS2;GCH1;ELOVL4;TPK1;TECR;NMNAT3;PDHB;ELOVL7;GPHN;COQ5;QDPR;COQ3;PNP;SPR;PDSS2;ADCK3
C-terminal protein amino acid modification (GO:0018410)	1932-09-01	0.0117131	0.42898	-1.85713	1.57178	PIGS;PIGU;PGAP1;PIGT;PIGA;PLAUR;PIGK;PIGM;PIGH
regulation of lipid storage (GO:0010883)	1938-10-01	0.0117395	0.42898	-1.8508	1.56642	ABCA1;OSBPL8;SCARB1;LPL;ITGAV;FITM2;ABHD5;ALKBH7;SREBF2;PLIN5
protein lipidation (GO:0006497)	15/70	0.0113989	0.42898	-1.83182	1.55036	ABCA1;PIGS;PIGU;PGAP1;PIGT;PLAUR;ATG10;ZDHHC17;PPM1B;PIGA;SELK;PIGK;NMT2;PIGM;PIGH
coenzyme metabolic process (GO:0006732)	32/196	0.0125255	0.435732	-1.96476	1.63218	LIPT2;SLC46A1;PANK3;ACSS2;HIBADH;SHMT1;TECR;HMGCR;PDHB;GPHN;PNP;SPR;PMVK;FDXR;PDSS2;PCK2;MCCC2;ACOT7;DGAT1;GCH1;ELOVL4;TPK1;DCXR;NMNAT3;ELOVL7;PGD;COQ5;RPIA;QDPR;COQ3;ACOT1;ADCK3
cell surface receptor signaling pathway involved in heart development (GO:0061311)	2016-07-21	0.0123953	0.435732	-1.82665	1.51745	NOTCH2;DLL4;GALNT11;JAG1;MSX2;SNAI1;LRP6
vesicle localization (GO:0051648)	1951-12-01	0.0124904	0.435732	-1.78736	1.48481	BBS2;TCF7L2;BLOC1S6;KIF3A;NDE1;VPS33A;CEP152;HAP1;BBS7;KIFAP3;TPGS1;PRKCZ
toll-like receptor TLR1:TLR2 signaling pathway (GO:0038123)	15/71	0.0126529	0.435732	-1.76742	1.46825	DUSP4;MAP2K3;JUN;MAP3K1;DUSP3;RIPK2;PPP2R5D;NOD1;FOS;DUSP6;RPS6KA5;IRAK2;PELI1;TAB1;MYD88
toll-like receptor TLR6:TLR2 signaling pathway (GO:0038124)	15/71	0.0126529	0.435732	-1.76416	1.46554	DUSP4;MAP2K3;JUN;MAP3K1;DUSP3;RIPK2;PPP2R5D;NOD1;FOS;DUSP6;RPS6KA5;IRAK2;PELI1;TAB1;MYD88
fatty acid oxidation (GO:0019395)	14/64	0.012308	0.435732	-1.68024	1.39582	PRKAA1;ABCD3;ECHS1;MMAA;ADIPOR2;POR;AMACR;PCCA;SCP2;EHHADH;ACADS;PPARGC1A;DECR1;PPARD
chaperone mediated protein folding requiring cofactor (GO:0051085)	2016-05-11	0.0127228	0.435732	-0.400185	0.332444	TOR3A;TOR2A;TOR1A;TOR1B;ERO1L
glycosphingolipid catabolic process (GO:0046479)	2016-05-11	0.0127228	0.435732	-0.371306	0.308455	NEU3;GM2A;HEXB;GBA;NAGA
blood vessel development (GO:0001568)	17/85	0.0129104	0.438857	-1.85048	1.52402	NOTCH2;TCF7L2;BMPR2;DLX3;LAMA4;PSEN1;AHR;TBX3;FOXO1;CYR61;FOSL1;TGFBR3;COL5A1;PPAP2B;HES1;DHCR7;NKX3-1
negative regulation of protein modification process (GO:0031400)	58/407	0.0133021	0.441827	-2.12449	1.73536	CDKN1C;CDKN1A;DUSP19;UBE2D1;HSPB1;PSMD8;RABGEF1;RGS2;HHEX;DEPTOR;DUSP10;RGS3;UBASH3B;SMPD1;JARID2;TRIM21;SOX4;DUSP4;DUSP3;IGFBP3;PAQR3;DUSP6;DUSP22;DNAJC3;LATS1;PPAP2B;CNKSR3;CRY1;ANAPC4;ANAPC5;TRIB1;ZNF675;GBA;HMGCR;PSEN1;PRKCZ;LRP6;SOCS1;INPP5J;SMYD3;SNX6;JUN;CDKN2B;CDKN2C;GADD45B;GADD45A;SPRY4;ATP2B4;SMAD6;ACER2;PDCL3;MLXIPL;GCLC;APC;TAOK3;DNAJC10;PTPN6;CALM1
negative regulation of phosphorus metabolic process (GO:0010563)	64/458	0.0137832	0.441827	-2.10475	1.71924	CDKN1C;CDKN1A;CSRNP2;DUSP19;HSPB1;CASC5;RABGEF1;RGS2;HHEX;RGS3;DUSP10;DEPTOR;UBASH3B;SMPD1;DUSP4;BCAS3;EDN1;DUSP3;IGFBP3;PAQR3;GMIP;DUSP6;DUSP22;DNAJC3;LATS1;PPAP2B;CNKSR3;TRIB1;ZNF675;SFI1;BIRC3;FICD;GBA;HMGCR;PSEN1;PRKCZ;FOXO1;LRP6;GNAI2;PRPSAP1;SLC9A3R1;SOCS1;INPP5J;SMYD3;SNX6;ARFGEF1;PTPN1;JUN;CDKN2B;ANKRD26;CDKN2C;GADD45B;GADD45A;SPRY4;SMAD6;PER1;MLXIPL;SH3RF2;TAOK3;TNIP1;APC;DNAJC10;PTPN6;C…
negative regulation of phosphate metabolic process (GO:0045936)	64/458	0.0137832	0.441827	-2.10215	1.71711	CDKN1C;CDKN1A;CSRNP2;DUSP19;HSPB1;CASC5;RABGEF1;RGS2;HHEX;RGS3;DUSP10;DEPTOR;UBASH3B;SMPD1;DUSP4;BCAS3;EDN1;DUSP3;IGFBP3;PAQR3;GMIP;DUSP6;DUSP22;DNAJC3;LATS1;PPAP2B;CNKSR3;TRIB1;ZNF675;SFI1;BIRC3;FICD;GBA;HMGCR;PSEN1;PRKCZ;FOXO1;LRP6;GNAI2;PRPSAP1;SLC9A3R1;SOCS1;INPP5J;SMYD3;SNX6;ARFGEF1;PTPN1;JUN;CDKN2B;ANKRD26;CDKN2C;GADD45B;GADD45A;SPRY4;SMAD6;PER1;MLXIPL;SH3RF2;TAOK3;TNIP1;APC;DNAJC10;PTPN6;C…
negative regulation of cell migration (GO:0030336)	28/166	0.0131264	0.441827	-1.94908	1.59208	PTGER4;IFITM1;CLIC4;C5AR2;ABHD2;SERPINE1;MIA3;PTPRK;THBS1;PTPRG;DLL4;RABGEF1;SLC9A3R1;HMOX1;CYP1B1;TIMP1;RNF20;OSBPL8;IGFBP5;IGFBP3;BMP5;TGFBR3;OLFM1;RAP2B;TRIB1;ADA;VCL;PPARD
liver development (GO:0001889)	17/86	0.0141618	0.441827	-1.87985	1.53553	CDKN2B;JUN;CADM1;HMGCS1;ARID5B;LSR;AACS;ACAT1;RUNX1;QDPR;TGFBR3;IFT88;MAN2A1;UCP2;HES1;JARID2;ADA
vitamin metabolic process (GO:0006766)	22/122	0.0140943	0.441827	-1.81754	1.48463	ABCD4;VKORC1;MCCC2;CBR1;SLC46A1;MMAA;TPK1;SHMT1;MCCC1;SLC2A3;NMNAT3;MTR;GPHN;GCLC;PCCA;CYP11A1;CYP2R1;PLTP;SLC19A2;PPARD;LGMN;CD320
MyD88-independent toll-like receptor signaling pathway (GO:0002756)	16/79	0.0141507	0.441827	-1.74985	1.42934	DUSP4;MAP2K3;JUN;DUSP3;RIPK2;UBE2D1;PPP2R5D;NOD1;FOS;DUSP6;RPS6KA5;CASP8;IRAK2;TAB1;IKBKE;BIRC3
sterol biosynthetic process (GO:0016126)	1939-10-01	0.0135515	0.441827	-1.73285	1.41545	IDI1;SQLE;PRKAA1;EBP;HMGCS1;INSIG1;PMVK;DHCR7;HMGCR;HSD17B7
positive regulation of lipid biosynthetic process (GO:0046889)	1952-12-01	0.0141072	0.441827	-1.72114	1.40589	SCARB1;TCF7L2;MLXIPL;PRKAA1;POR;ANXA1;CREBL2;SORBS1;NR1D1;PTGS2;CYR61;PLIN5
interferon-gamma-mediated signaling pathway (GO:0060333)	14/65	0.0137145	0.441827	-1.71651	1.40211	PTPN1;HLA-C;HLA-A;IFI30;HLA-E;ICAM1;OASL;PIAS1;MT2A;SOCS1;IRF1;PTPN6;CAMK2G;CD44
deoxyribose phosphate metabolic process (GO:0019692)	1933-09-01	0.0137075	0.441827	-1.68856	1.37928	DTYMK;OGG1;ADK;PGM2;NT5M;NUDT15;SAMHD1;ADA;CCNO
lipid oxidation (GO:0034440)	14/65	0.0137145	0.441827	-1.64833	1.34641	PRKAA1;ABCD3;ECHS1;MMAA;ADIPOR2;POR;AMACR;PCCA;SCP2;EHHADH;ACADS;PPARGC1A;DECR1;PPARD
organic hydroxy compound metabolic process (GO:1901615)	66/476	0.0144168	0.446725	-1.9917	1.60493	SCARB1;NUDT3;SPTLC2;SPR;SCP2;IMPA1;SMPD1;CYP2R1;FDXR;CYP1B1;GPR37;DGAT1;HMGCS1;DIO3;PLA2G4A;SREBF2;PLA2G15;ALDH1A3;PLA2G16;POR;CAT;SMPDL3A;ALDH7A1;PPARD;IDI1;PRKAA1;ACSS2;EPAS1;NPR1;MAOA;SHMT1;INSIG1;CHRNA7;GBA;HMGCR;SGMS2;CLN8;HSD17B7;SLC5A3;GK5;SULT1A1;EBP;CYP11A1;PMVK;INPP5J;PLTP;ABCA1;GK;GOT1;GCH1;PNPLA8;AKR1C1;SRD5A3;MBOAT1;ACER2;NR4A2;SQLE;COQ3;AMACR;LPCAT3;ACER3;LPCAT2;DHCR7;CALM1;LPIN3;LG…
organelle assembly (GO:0070925)	42/278	0.0146206	0.44998	-2.06408	1.64827	CEP164;FBF1;CCP110;CASC5;PSEN1;TTBK2;RPGR;CENPC;DYNC2LI1;ABLIM1;ARL13B;MCIDAS;KIF3A;TCTN2;TMEM107;DZIP1L;NEK2;FOPNL;BBS7;MYH10;SAC3D1;CCRN4L;RAB8B;BBS2;DYNC1H1;CEP135;IFT140;CEP152;STARD9;WDR19;NEK7;SPICE1;HAUS4;HAUS5;CENPE;BBS10;TMEM216;TTC30A;ATG4C;ATG2A;ULK3;CCNO
cellular component morphogenesis (GO:0032989)	61/437	0.016195	0.454617	-2.02747	1.59825	GALNT11;CLIC4;ULK4;CLU;LOXL2;SPR;TCTN2;TCTN1;ITGAV;BBS7;DNM1L;TBCCD1;MSX2;SLC11A2;SHROOM1;TGFBR3;IFT88;BIN3;RILPL2;RP2;TMEM216;NUMB;S100A6;MYH9;S100A4;EPHA2;CNP;ARHGEF28;SDC2;MYCBP2;SLC1A3;LRP6;SCFD1;SPAST;ARL13B;KIF3A;MICALL2;HES1;CAP2;BBS2;FZD1;MAP3K1;CADM1;KIDINS220;VDR;TBCC;PARVA;VAX2;KLF2;NR4A2;DAB2;BCL6;APC;TBCE;ID1;ABI1;SNAI1;SNAI2;NES;FERMT2;C5ORF30
phospholipid metabolic process (GO:0006644)	43/288	0.0160426	0.454617	-1.95816	1.54362	IDI1;PI4K2B;PIGU;PGAP1;MTMR3;HEXB;LPL;ABHD5;SGMS2;PIK3R1;CLN8;LYST;AGPAT4;SPTLC2;IMPA1;ACP6;SMPD1;PMVK;INPP5J;BPNT1;PIP4K2C;SH3GLB1;DGAT1;PNPLA8;SRD5A3;MBOAT1;PLA2G4A;SYNJ2;PLA2G15;PLA2G16;PPAP2B;LPCAT3;ETNK1;PIGA;LPCAT2;PNPLA3;NAPEPLD;PIGM;SMPDL3A;LPIN3;SERINC5;PPARD;PIGH
lipid transport (GO:0006869)	31/193	0.016639	0.454617	-1.896	1.49462	SCARB1;STX12;ATP10D;CLN8;CLU;SLC9A3R1;GM2A;SCP2;PLTP;ATP9B;MFSD2A;OSBPL9;ABCA1;OSBPL8;PRELID2;PRKAB2;SLMO1;ATP8B3;STARD5;ANXA1;ABCA5;PNPLA8;OSBPL3;AKR1C1;PLA2G4A;SELM;ESYT3;PLIN2;ESYT1;PPARD;OSBP2
Notch signaling pathway (GO:0007219)	23/131	0.0158442	0.454617	-1.87414	1.47738	HES7;TLE4;NOTCH2;MESP1;GALNT11;JAG1;SEL1L;NKAP;NOTCH2NL;DTX2;PSEN1;DLL4;IFT88;TFDP2;AGO3;AGO1;SNAI1;NUMB;SNAI2;HES1;MAML3;TNRC6B;SKP1
toll-like receptor 3 signaling pathway (GO:0034138)	16/80	0.0155582	0.454617	-1.74374	1.37459	DUSP4;MAP2K3;JUN;DUSP3;RIPK2;UBE2D1;NOD1;PPP2R5D;FOS;DUSP6;RPS6KA5;CASP8;IRAK2;TAB1;IKBKE;BIRC3
toll-like receptor 9 signaling pathway (GO:0034162)	15/73	0.0154812	0.454617	-1.73536	1.36798	DUSP4;MAP2K3;JUN;MAP3K1;DUSP3;RIPK2;NOD1;PPP2R5D;FOS;DUSP6;RPS6KA5;IRAK2;PELI1;TAB1;MYD88
toll-like receptor 2 signaling pathway (GO:0034134)	15/73	0.0154812	0.454617	-1.7179	1.35422	DUSP4;MAP2K3;JUN;MAP3K1;DUSP3;RIPK2;PPP2R5D;NOD1;FOS;DUSP6;RPS6KA5;IRAK2;PELI1;TAB1;MYD88
lymphocyte mediated immunity (GO:0002449)	1953-12-01	0.0158784	0.454617	-1.68752	1.33027	JAG1;MSH2;CADM1;RAET1G;PTPN6;TUBB4B;LYST;ULBP1;MICA;MYD88;CTSC;ULBP3
vesicle docking (GO:0048278)	1934-09-01	0.0159423	0.454617	-1.67273	1.31861	UNC13B;SCFD1;BLOC1S6;STXBP3;SCFD2;STXBP1;VPS33A;EXOC6B;EXOC4
cellular component disassembly involved in execution phase of apoptosis (GO:0006921)	1953-12-01	0.0158784	0.454617	-1.62291	1.27934	TJP1;H1F0;CASP8;APC;CASP6;LMNA;VIM;DNM1L;SPTAN1;TJP2;PLEC;DEDD2
polysaccharide catabolic process (GO:0000272)	2016-07-22	0.0150567	0.454617	-1.5387	1.21296	MANBA;PGM2;PHKA1;PYGL;CALM1;PHKA2;GYG1
glycoside metabolic process (GO:0016137)	2016-06-17	0.0163637	0.454617	-1.22402	0.964892	ABHD10;AKR1C1;FUCA1;FUCA2;NAGA;AKR1B1
negative regulation of smooth muscle cell migration (GO:0014912)	2016-05-12	0.0166676	0.454617	-0.313332	0.246999	IGFBP5;IGFBP3;SERPINE1;TRIB1;PPARD
regulation of sequestering of triglyceride (GO:0010889)	2016-05-12	0.0166676	0.454617	-0.29642	0.233668	OSBPL8;LPL;FITM2;ABHD5;PLIN5
regulation of p38MAPK cascade (GO:1900744)	2016-05-12	0.0166676	0.454617	-0.274822	0.216641	PER1;GADD45B;GADD45A;ULK4;MAP3K4
ubiquinone metabolic process (GO:0006743)	2016-05-12	0.0166676	0.454617	-0.167252	0.131844	COQ3;PDSS2;HMGCR;ADCK3;COQ5
C21-steroid hormone biosynthetic process (GO:0006700)	2016-05-12	0.0166676	0.454617	-0.161576	0.127371	STARD5;SCP2;CYP11A1;AKR1B1;ADM
sulfur amino acid catabolic process (GO:0000098)	2016-05-12	0.0166676	0.454617	-0.126528	0.0997422	CTH;ETHE1;SQRDL;SUOX;PCYOX1
glycolipid catabolic process (GO:0019377)	2016-05-12	0.0166676	0.454617	-0.119792	0.094432	NEU3;GM2A;HEXB;GBA;NAGA
polysaccharide metabolic process (GO:0005976)	17/88	0.0169471	0.459487	-1.73356	1.34809	TCF7L2;MANBA;CMAS;TP53RK;PHKA1;PYGL;ALG1;NR1D1;PHKA2;PGM2L1;EXT1;PPP1R3C;PPP1R3E;PGM2;CALM1;NANS;GYG1
negative regulation of MAP kinase activity (GO:0043407)	15/74	0.0170664	0.459985	-1.68448	1.3081	DUSP4;DUSP3;SPRY4;PAQR3;GBA;DUSP19;HMGCR;DUSP6;DUSP22;RGS2;RGS3;DUSP10;SMPD1;PTPN6;ZNF675
cilium organization (GO:0044782)	22/125	0.0176174	0.472043	-1.82088	1.36691	BBS2;IFT140;CEP164;WDR19;FBF1;RPGR;TTBK2;DYNC2LI1;ABLIM1;BBS10;ARL13B;MCIDAS;KIF3A;TCTN2;TMEM216;TTC30A;TMEM107;DZIP1L;FOPNL;BBS7;CCNO;RAB8B
'de novo' protein folding (GO:0006458)	1954-12-01	0.0178125	0.47448	-1.61215	1.20192	SH3GLB1;TOR3A;TUBB6;TOR2A;TOR1A;TUBB2A;VBP1;TBCE;TBCC;TUBB4B;TOR1B;ERO1L
response to nutrient levels (GO:0031667)	43/291	0.0184771	0.476132	-2.00987	1.49145	PRKAA1;BMPR2;OGG1;CHRNA7;ADM;HMGCR;PTGS2;ADIPOR2;FOXO1;AACS;ACAT1;ICAM1;LRP6;GNAI2;CST3;NUAK2;CYP11A1;UCP2;PDK4;HMOX1;PITX2;ACADS;PPARGC1A;SLC25A25;ABCA1;TCF7L2;JUN;CDKN2B;GPX1;HSPA5;HMGCS1;VDR;BCKDHB;RNASE4;USF1;DHODH;POR;DDIT3;CAT;ATG2A;ADA;PPARD;CPEB4
endosomal transport (GO:0016197)	30/187	0.0185017	0.476132	-1.79169	1.32954	USP6NL;RAB5B;KIAA1033;GCC2;FAM109A;ADRB2;LYST;SNX4;BLOC1S6;SNX27;MICALL2;EPG5;ERC1;TBC1D10A;SNX6;ABCA1;MON2;TMED9;SNAPIN;AKTIP;KLHL20;RAB32;FAM160A2;ZFYVE16;EHD4;SNX16;ALMS1;CHMP4C;CORO7;STAM2
stress-activated MAPK cascade (GO:0051403)	17/89	0.0184897	0.476132	-1.73135	1.28476	PTGER4;DUSP4;MAP2K3;JUN;DUSP3;RIPK2;DUSP19;NOD1;PPP2R5D;FOS;DUSP6;DUSP10;RPS6KA5;IRAK2;TAB1;TRIB1;MYD88
purine nucleoside bisphosphate metabolic process (GO:0034032)	1935-09-01	0.0184329	0.476132	-1.71093	1.26962	SULT1A1;MCCC2;SLC26A2;PANK3;ACOT7;BPNT1;HMGCR;PAPSS2;PAPSS1
nucleoside bisphosphate metabolic process (GO:0033865)	1935-09-01	0.0184329	0.476132	-1.70577	1.26578	SULT1A1;MCCC2;SLC26A2;PANK3;ACOT7;BPNT1;HMGCR;PAPSS2;PAPSS1
ribonucleoside bisphosphate metabolic process (GO:0033875)	1935-09-01	0.0184329	0.476132	-1.70043	1.26182	SULT1A1;MCCC2;SLC26A2;PANK3;ACOT7;BPNT1;HMGCR;PAPSS2;PAPSS1
MyD88-dependent toll-like receptor signaling pathway (GO:0002755)	16/82	0.0186959	0.478425	-1.71298	1.26291	MAP2K3;DUSP4;JUN;MAP3K1;DUSP3;RIPK2;NOD1;PPP2R5D;FOS;DUSP6;RPS6KA5;TNIP1;IRAK2;PELI1;TAB1;MYD88
response to toxic substance (GO:0009636)	24/142	0.0201233	0.486918	-1.82942	1.31656	CDKN1A;ENDOG;GPX1;GSTM1;HSPA5;CNP;EPHX1;XPA;ZC3H8;PLA2G4A;SLC1A3;AHR;FOS;CRIP1;BPHL;ETS1;ABTB2;CST3;NR4A2;SCFD1;CASP8;CYP11A1;ID1;CYP1B1
negative regulation of extrinsic apoptotic signaling pathway (GO:2001237)	18/97	0.0197438	0.486918	-1.81972	1.30958	TCF7L2;GPX1;SERPINE1;IFI6;THBS1;SH3RF1;ICAM1;BMP5;ZC3HC1;AR;DAB2;GCLC;PEA15;LMNA;SNAI2;HMOX1;ITGA6;ITGAV
pattern recognition receptor signaling pathway (GO:0002221)	24/142	0.0201233	0.486918	-1.81668	1.3074	DUSP4;MAP2K3;JUN;MAP3K1;DUSP3;RIPK2;UBE2D1;PPP2R5D;NOD1;FOS;DUSP6;RPS6KA5;CASP8;TNIP1;IRAK2;CTSL;TRIM5;PELI1;TAB1;IKBKE;MYD88;CTSB;LGMN;BIRC3
lipid modification (GO:0030258)	23/134	0.0195723	0.486918	-1.72717	1.24298	PI4K2B;PRKAA1;ABCD3;MTMR3;ECHS1;MMAA;PIK3R1;SYNJ2;ADIPOR2;POR;AMACR;PCCA;SCP2;IMPA1;EHHADH;INPP5J;BPNT1;PIP4K2C;ACADS;PPARGC1A;PPAPDC1B;PPARD;DECR1
vesicle transport along microtubule (GO:0047496)	2016-06-18	0.0201407	0.486918	-1.05129	0.756572	KIF3A;NDE1;CEP152;HAP1;KIFAP3;PRKCZ
deoxyribonucleotide catabolic process (GO:0009264)	2016-06-18	0.0201407	0.486918	-1.00666	0.724456	OGG1;NT5M;NUDT15;SAMHD1;ADA;CCNO
glycogen catabolic process (GO:0005980)	2016-06-18	0.0201407	0.486918	-0.961569	0.692003	PGM2;PHKA1;PYGL;CALM1;PHKA2;GYG1
morphogenesis of an epithelial sheet (GO:0002011)	2016-06-18	0.0201407	0.486918	-0.955101	0.687348	DLL4;NOTCH2;JAG1;MPP5;PHACTR4;LRP6
type B pancreatic cell proliferation (GO:0044342)	2016-04-08	0.0202036	0.486918	2.26347	-1.62893	IGFBP5;IGFBP3;ADK;BTBD10
lipopolysaccharide biosynthetic process (GO:0009103)	2016-04-08	0.0202036	0.486918	2.30122	-1.6561	CMAS;TP53RK;ALG1;NANS
oligosaccharide catabolic process (GO:0009313)	2016-04-08	0.0202036	0.486918	2.4382	-1.75468	NEU3;GM2A;HEXB;NEU1
vacuole organization (GO:0007033)	13/62	0.0204028	0.48913	-1.58501	1.13348	ABCA1;AKTIP;HEXB;PSEN1;CLN8;LYST;FAM160A2;MAN2A1;PPT1;ATG2A;ULK3;ATG4C;EPG5
carbohydrate derivative biosynthetic process (GO:1901137)	53/377	0.0213375	0.495039	-1.87958	1.32157	PIGU;PANK3;CMAS;TP53RK;MPI;ADK;ADM;PYGL;NANS;PHLDA1;ACOT7;ALG6;ABCC5;ALG14;ALG1;ALG10;DCK;QTRT1;RP2;PIGA;UPRT;B4GALT7;ALG10B;B4GALT4;PIGH;PRPS2;PRPS1;SLC26A2;DTYMK;SLC35D1;SDC4;NPR1;SDC2;AK1;GCNT1;UAP1;PAPSS2;PAPSS1;GCNT2;ADSS;ST3GAL1;MPDU1;PMM1;GK;GFPT2;SRD5A3;DHODH;EXT1;TNIP1;IMPDH1;GNAS;CSPG4;ADA
regulation of proteasomal protein catabolic process (GO:0061136)	23/135	0.0209565	0.495039	-1.81705	1.2776	PLK3;GPX1;PLK2;ARAF;UBE2D1;COMMD1;PSEN1;TERF1;CLU;SVIP;PIAS1;CENPE;GCLC;DAB2;ESPL1;APC;OPHN1;ANAPC4;ANAPC5;BBS7;TRIB1;BTRC;MAD1L1
activation of innate immune response (GO:0002218)	25/151	0.0219534	0.495039	-1.75169	1.23165	UBE2D1;NOD1;RPS6KA5;CASP8;IRAK2;CTSL;TRIM5;IKBKE;CTSB;MB21D1;DUSP4;MAP2K3;JUN;MAP3K1;DUSP3;RIPK2;PPP2R5D;FOS;DUSP6;TNIP1;PELI1;TAB1;MYD88;LGMN;BIRC3
sphingolipid metabolic process (GO:0006665)	22/128	0.021796	0.495039	-1.71225	1.20391	CERS6;HEXB;GBA;NAGA;SGMS2;CLN8;TEX2;SUMF1;PLA2G15;ACER2;NEU3;SPTLC2;GM2A;SPTLC3;PPAP2B;SMPD1;ARSJ;NEU1;ACER3;PPT1;SMPDL3A;SERINC5
stress-activated protein kinase signaling cascade (GO:0031098)	17/91	0.0218964	0.495039	-1.68135	1.18219	PTGER4;DUSP4;MAP2K3;JUN;DUSP3;RIPK2;DUSP19;PPP2R5D;NOD1;FOS;DUSP6;RPS6KA5;DUSP10;IRAK2;TAB1;TRIB1;MYD88
nitric oxide metabolic process (GO:0046209)	2016-08-30	0.0217327	0.495039	-1.51756	1.06702	GCHFR;POR;ARG2;P2RX4;SPR;GCH1;CYP1B1;CALM1
adipose tissue development (GO:0060612)	2016-08-30	0.0217327	0.495039	-1.38476	0.973648	AMER1;SELM;ARRDC3;ARID5B;AACS;SLC25A25;ACAT1;PPARD
branching involved in mammary gland duct morphogenesis (GO:0060444)	2016-07-24	0.0215517	0.495039	-1.24598	0.876076	MSX2;VDR;NCOA3;BTRC;TBX3;EPHA2;LRP6
ceramide catabolic process (GO:0046514)	2016-05-13	0.0213466	0.495039	-0.035383	0.0248785	NEU3;GM2A;HEXB;GBA;NAGA
negative regulation of multicellular organism growth (GO:0040015)	2016-05-13	0.0213466	0.495039	-0.0256793	0.0180556	BBS2;ANKRD26;GNAS;ADRB2;LGMN
4-hydroxyproline metabolic process (GO:0019471)	2016-05-13	0.0213466	0.495039	0.00383511	-0.00269654	EGLN3;PRDX4;ERO1LB;P4HA1;ERO1L
sphingoid metabolic process (GO:0046519)	2016-05-13	0.0213466	0.495039	0.0369716	-0.0259955	ACER2;SPTLC2;SPTLC3;ACER3;GBA
cellular carbohydrate biosynthetic process (GO:0034637)	1956-12-01	0.0222032	0.498205	-1.52969	1.0658	EXT1;CMAS;TP53RK;PPP1R3C;GOT1;IMPA1;PGM2;NR1D1;ALG1;NANS;GYG1;PGM2L1
response to starvation (GO:0042594)	19/106	0.0225086	0.501547	-1.68913	1.1656	TCF7L2;JUN;PRKAA1;BMPR2;HSPA5;RNASE4;ADM;FOXO1;AACS;DHODH;ACAT1;NUAK2;DDIT3;UCP2;ATG2A;PDK4;PPARGC1A;ACADS;CPEB4
regulation of smooth muscle cell proliferation (GO:0048660)	15/77	0.0225724	0.501547	-1.56645	1.08094	TCF7L2;EDN1;JUN;IGFBP5;NPR1;IGFBP3;HMGCR;PTGS2;MFN2;HMOX1;TRIB1;PPARGC1A;MYD88;HBEGF;PPARD
innate immune response-activating signal transduction (GO:0002758)	24/144	0.0229412	0.502389	-1.74559	1.20163	DUSP4;MAP2K3;JUN;MAP3K1;DUSP3;RIPK2;UBE2D1;PPP2R5D;NOD1;FOS;DUSP6;RPS6KA5;CASP8;TNIP1;IRAK2;CTSL;TRIM5;PELI1;TAB1;IKBKE;MYD88;CTSB;LGMN;BIRC3
sulfur compound catabolic process (GO:0044273)	1943-10-01	0.0229384	0.502389	-1.45782	1.00353	ACOT7;CTH;ETHE1;HEXB;IDS;CSPG4;SQRDL;SUOX;GNS;PCYOX1
cell killing (GO:0001906)	1943-10-01	0.0229384	0.502389	-1.41531	0.97427	PCCA;CADM1;RAET1G;PTPN6;TUBB4B;LYST;ULBP1;MICA;CTSC;ULBP3
negative regulation of cellular component movement (GO:0051271)	29/183	0.0230943	0.503324	-1.77522	1.21872	PTGER4;IFITM1;CLIC4;C5AR2;ABHD2;SERPINE1;MIA3;PTPRK;THBS1;PTPRG;DLL4;RABGEF1;SLC9A3R1;HMOX1;CYP1B1;TIMP1;RNF20;OSBPL8;IGFBP5;IGFBP3;AP1AR;BMP5;TGFBR3;OLFM1;RAP2B;TRIB1;ADA;VCL;PPARD
negative regulation of cell cycle (GO:0045786)	59/430	0.0234678	0.509028	-1.93752	1.30831	CDKN1C;CDKN1A;UBE2D1;PTPRK;ETS1;CDC73;NUBP1;PSMD8;RASSF1;HHEX;NBN;SOX4;CDK5RAP2;NKX3-1;TSPYL2;USP47;GAS2L3;TIPIN;PRKAB2;HUS1;TERF1;LATS1;PLA2G16;ESPL1;MSH2;IRF1;DDIT3;CHMP4C;ANAPC4;ANAPC5;MAD1L1;NOTCH2;BLM;PRKAA1;AK1;PTGS2;THBS1;AURKB;PLAGL1;MFN2;APBB2;E2F7;TCF7L2;PLK3;CDKN2B;CDKN2C;CRADD;GADD45A;PLK2;RPA2;ZWINT;MLXIPL;APC;TAOK3;NABP1;HBP1;EIF4G2;RAD9A;CDKN3
cellular response to topologically incorrect protein (GO:0035967)	17/92	0.0237692	0.513121	-1.61786	1.07951	TSPYL2;PTPN1;TOR1A;HSPA5;FKBP14;WFS1;RHBDD1;EIF2AK3;PARP16;ERO1L;DNAJC3;ATXN3;DDIT3;CTH;LMNA;ATF6;ATF3
cilium morphogenesis (GO:0060271)	1950-11-01	0.0240497	0.516728	-1.50983	0.996846	BBS2;GALNT11;IFT88;KIF3A;TCTN2;TMEM216;TCTN1;ULK4;PARVA;BBS7;C5ORF30
glucan catabolic process (GO:0009251)	2016-06-19	0.0244681	0.52325	-0.783192	0.507271	PGM2;PHKA1;PYGL;CALM1;PHKA2;GYG1
regulation of MAP kinase activity (GO:0043405)	40/273	0.0249475	0.524383	-1.84682	1.19218	PRKAA1;CHRNA7;GBA;DUSP19;CXCR4;TGFA;NOD1;HMGCR;MST1R;PSEN1;THBS1;RGS2;DUSP10;RGS3;IRAK2;SMPD1;S1PR2;MAP3K6;MAP3K4;MAP2K3;DUSP4;EDN1;MAP3K1;DUSP3;EGF;RIPK2;SPRY4;PAQR3;GAB1;DUSP6;DUSP22;DAB2;KITLG;TAOK3;MDFIC;PTPN6;CSPG4;TAB1;TRIB1;ZNF675
glycosylation (GO:0070085)	40/273	0.0249475	0.524383	-1.8204	1.17513	GALNT11;CCDC126;GALNT18;FUT10;GCNT1;MPI;UAP1;MAGT1;PSEN1;ART5;UBE2J1;CLN5;LMF1;MAN1A2;MAN2A1;GCNT2;MAN1A1;UGGT2;ST3GAL1;CLASP2;EDEM3;PMM1;PARP1;ALG6;GFPT2;EDEM2;SRD5A3;C1GALT1;ALG14;SIRT5;PARP16;ALG1;ALG10;EXT1;EOGT;PIGM;ISPD;B4GALT7;ALG10B;B4GALT4
carbohydrate biosynthetic process (GO:0016051)	22/130	0.0249816	0.524383	-1.70012	1.09748	CMAS;PMM1;GOT1;TP53RK;GFPT2;ALG1;NR1D1;PGD;PGM2L1;EXT1;G6PC3;PPP1R3C;IMPA1;CRY1;PGM2;ALDOC;NANS;PPARGC1A;GYG1;ATF3;PCK2;MPDU1
organophosphate ester transport (GO:0015748)	14/71	0.0249108	0.524383	-1.51789	0.979848	ABCA1;SCARB1;PRELID2;SLC35A1;SLMO1;ATP8B3;SLC35B4;SLC35D1;ATP10D;G6PC3;SCP2;SLC25A19;ATP9B;MFSD2A
protein dephosphorylation (GO:0006470)	26/161	0.0252213	0.524579	-1.63986	1.05797	MTMR3;SMEK1;DUSP19;PPM1K;PTPRK;CDC14A;PTPRG;DUSP10;UBASH3B;BTRC;DUSP4;PTPN1;DUSP3;STYX;PTPN13;CDC25C;DUSP6;CDC25B;DUSP22;PPM1B;NCEH1;PDP2;PTPN6;PHPT1;PTPN4;CDKN3
2'-deoxyribonucleotide metabolic process (GO:0009394)	2016-08-31	0.0251778	0.524579	-1.21754	0.785506	DTYMK;OGG1;ADK;NT5M;NUDT15;SAMHD1;ADA;CCNO
response to alcohol (GO:0097305)	40/274	0.0261084	0.524761	-1.87722	1.21045	CDKN1A;PRKAA1;OGG1;CHRNA7;GBA;ITPR2;HMGCR;HOXB13;PTGS2;CSF2RA;THBS1;ETS1;AACS;ICAM1;LRP6;CTGF;POLB;EPS8;CST3;CASP8;CYP11A1;ZNF703;PMVK;SMYD3;NKX3-1;ABCA1;EDN1;GPX1;ANXA1;HMGCS1;MSX2;VDR;GGH;FOS;FBXO32;TJP1;FOSL1;FOSB;TXNIP;CALM1
intrinsic apoptotic signaling pathway (GO:0097193)	27/170	0.0270116	0.524761	-1.72609	1.11301	CDKN1A;XPA;PIK3R1;BRCA2;UACA;CRIP1;CLU;ERO1L;POLB;BCL2L11;CASP8;YWHAQ;PERP;TMEM109;HMOX1;CYP1B1;NBN;IKBKE;WWOX;GPX1;BNIP3;EIF2AK3;MSH2;DDIT3;DNAJC10;SELK;EPHA2
ameboidal-type cell migration (GO:0001667)	21/123	0.0260238	0.524761	-1.71927	1.1086	SCARB1;MESP1;NRP2;GPX1;SEMA3C;ARID5B;CXCR4;SYNE2;ROBO1;LRP6;LOXL2;NR4A1;EFNB1;FERMT1;KITLG;ID1;CYP1B1;MYH9;PITX2;PPARD;PHACTR4
regulation of proteasomal ubiquitin-dependent protein catabolic process (GO:0032434)	20/116	0.0270706	0.524761	-1.67587	1.08062	PLK3;PLK2;ARAF;UBE2D1;COMMD1;PSEN1;TERF1;CLU;SVIP;PIAS1;CENPE;DAB2;GCLC;ESPL1;APC;ANAPC4;ANAPC5;BBS7;TRIB1;MAD1L1
connective tissue development (GO:0061448)	1944-10-01	0.0258796	0.524761	-1.4033	0.904869	AMER1;COL5A1;SELM;ARRDC3;ARID5B;THBS1;AACS;SLC25A25;ACAT1;PPARD
multicellular organismal homeostasis (GO:0048871)	1944-10-01	0.0258796	0.524761	-1.35842	0.875927	GPX1;EDN2;SLC11A2;ARRDC3;PRCP;NR1D1;OMA1;ADRB2;PPARGC1A;FOXO1
prostaglandin biosynthetic process (GO:0001516)	2016-05-14	0.0268031	0.524761	0.0461507	-0.0297586	EDN1;EDN2;PNPLA8;PTGS2;PTGES
embryonic camera-type eye development (GO:0031076)	2016-05-14	0.0268031	0.524761	0.0562577	-0.0362757	RARG;WDR19;TULP3;PITX2;NES
cellular response to cadmium ion (GO:0071276)	2016-05-14	0.0268031	0.524761	0.076602	-0.0493939	CYP11A1;OGG1;HMOX1;MT1X;MT1E
prostanoid biosynthetic process (GO:0046457)	2016-05-14	0.0268031	0.524761	0.0793146	-0.051143	EDN1;EDN2;PNPLA8;PTGS2;PTGES
centrosome duplication (GO:0051298)	2016-05-14	0.0268031	0.524761	0.128947	-0.0831464	CEP152;NDE1;CCP110;BRCA2;SAC3D1
antigen processing and presentation of exogenous peptide antigen via MHC class I, TAP-independent (GO:0002480)	2016-04-09	0.0270733	0.524761	2.24444	-1.44725	HLA-C;LNPEP;HLA-A;HLA-E
mitochondrial calcium ion transport (GO:0006851)	2016-04-09	0.0270733	0.524761	2.29845	-1.48207	MCUR1;MICU2;MICU1;SLC8B1
lipopolysaccharide metabolic process (GO:0008653)	2016-04-09	0.0270733	0.524761	2.54594	-1.64165	CMAS;TP53RK;ALG1;NANS
regulation of RIG-I signaling pathway (GO:0039535)	2016-04-09	0.0270733	0.524761	2.54771	-1.6428	TRIM15;ZC3HAV1;DDX60;BIRC3
purine deoxyribonucleotide catabolic process (GO:0009155)	2016-04-09	0.0270733	0.524761	2.60037	-1.67675	OGG1;SAMHD1;NUDT15;ADA
regulation of fatty acid metabolic process (GO:0019217)	14/72	0.0272942	0.526802	-1.54496	0.990214	PRKAB2;ANKRD26;ANXA1;INSIG1;EIF2AK3;PDHB;PTGS2;MLXIPL;PDPR;PDP2;PDK4;PPARGC1A;PLIN5;WDTC1
organelle fission (GO:0048285)	46/325	0.0276895	0.527723	-1.76199	1.12624	TDRKH;ERCC6L;MTFP1;CEP164;NEDD9;CASC5;YEATS4;BRCA2;AURKB;CENPC;SLC2A8;CCNB2;KATNA1;NEK2;PIM2;FAM83D;DNM1L;SAC3D1;CEP55;CLASP2;TIPIN;PEX19;BNIP3;NDE1;KLHL21;HAUS4;HAUS5;CDC25C;TERF1;GDAP1;GEM;CD2AP;CDC25B;ZC3HC1;LATS1;DYNC1LI1;MIS18A;ANAPC4;KIF2C;ANAPC5;MTFR1;FAM64A;MTFR2;MAD1L1;SPC24;SPC25
oxidoreduction coenzyme metabolic process (GO:0006733)	13/65	0.0274588	0.527723	-1.47072	0.94006	HIBADH;DCXR;NMNAT3;HMGCR;PGD;COQ5;RPIA;COQ3;PNP;FDXR;PDSS2;ADCK3;PCK2
ER-associated ubiquitin-dependent protein catabolic process (GO:0030433)	1938-09-01	0.0275859	0.527723	-1.35434	0.865668	FOXRED2;TOR1A;RNF103;HSPA5;OS9;WFS1;RHBDD1;DNAJC10;UBE2J1
nucleoside monophosphate metabolic process (GO:0009123)	58/427	0.0286128	0.541628	-1.798	1.10249	ABCD4;ABCD3;EIF4A3;DDX12P;ADK;IDE;TOP1MT;KIF21A;TOR3A;ABCC5;STARD9;DDX10;CHD1L;DCK;MYL6;RAD51D;MSH2;ATP6V1B2;MYH9;KIF2C;UPRT;PRPS2;PRPS1;PIF1;BLM;DTYMK;DDX27;ABCB7;YTHDC2;AK1;ABCB8;ABCB9;RAD54B;SPAST;KIF3A;KATNA1;NT5M;LONRF3;KIF3C;MYH10;ADSS;SLC25A25;ATF7IP;ABCA1;DYNC1H1;TOR1A;HSPA5;MYO10;ABCA5;HSPA6;GTF2H2;TOR1B;SMARCA2;DHODH;MYO1E;CENPE;IMPDH1;ADA
negative regulation of apoptotic signaling pathway (GO:2001234)	29/187	0.0288383	0.541628	-1.77336	1.08738	TMEM161A;SERPINE1;MPV17L;IFI6;HSPB1;PSEN1;THBS1;CLU;SH3RF1;ICAM1;PEA15;LMNA;HMOX1;ITGAV;TAF9B;TCF7L2;GPX1;WFS1;MKL1;BMP5;ZC3HC1;AR;DAB2;GCLC;CTH;SNAI1;SNAI2;ITGA6;CD44
peptidyl-tyrosine dephosphorylation (GO:0035335)	18/102	0.0291326	0.541628	-1.50916	0.92538	DUSP4;PTPN1;MTMR3;DUSP3;DUSP19;PTPRK;PTPN13;CDC25C;CDC14A;DUSP6;CDC25B;PTPRG;DUSP22;DUSP10;UBASH3B;PTPN6;PTPN4;CDKN3
response to antibiotic (GO:0046677)	1945-10-01	0.0290813	0.541628	-1.42237	0.872166	ENDOG;CASP8;HSPA5;CYP11A1;ID1;PLA2G4A;ZC3H8;SLC1A3;ETS1;CRIP1
membrane docking (GO:0022406)	1945-10-01	0.0290813	0.541628	-1.28975	0.790847	UNC13B;SCFD1;BLOC1S6;STXBP3;SCFD2;STXBP1;VPS33A;EXOC6B;EXOC4;ICAM1
regulation of intrinsic apoptotic signaling pathway in response to DNA damage (GO:1902229)	1932-08-01	0.0289863	0.541628	-1.28186	0.786006	STEAP3;TMEM161A;SNAI1;SNAI2;TAF9B;CLU;CD44;RAD9A
cellular response to oxidative stress (GO:0034599)	24/148	0.0294839	0.543721	-1.66101	1.01208	PRKAA1;GPX1;TMEM161A;ANXA1;EPAS1;BNIP3;SLC11A2;VRK2;FOS;HBA1;PTPRK;FOXO3;UACA;OXR1;ETS1;FOXO1;KLF2;CST3;NET1;NR4A2;CAT;HMOX1;CYP1B1;PPARGC1A
mitochondrial fission (GO:0000266)	2016-06-20	0.0293745	0.543721	-0.686467	0.418278	MTFP1;BNIP3;MTFR1;MTFR2;DNM1L;GDAP1
positive regulation of heart contraction (GO:0045823)	2016-07-26	0.029767	0.544532	-1.12846	0.685909	RGS2;EDN1;EDN2;CHRNA7;ADM;ADA;CTGF
ketone biosynthetic process (GO:0042181)	2016-07-26	0.029767	0.544532	-1.07623	0.654162	COQ3;SCP2;CYP11A1;PDSS2;ADM;ADCK3;COQ5
establishment of vesicle localization (GO:0051650)	17/95	0.0301157	0.546201	-1.55512	0.940486	BBS2;STX12;TOR1A;SNAPIN;CEP152;CACFD1;NDE1;AP3B1;AP3B2;PRKCZ;BLOC1S6;PCLO;OPHN1;KIF3A;HAP1;BBS7;KIFAP3
response to hydrogen peroxide (GO:0042542)	17/95	0.0301157	0.546201	-1.53178	0.926375	PRKAA1;JUN;ANXA1;GPX1;BNIP3;HBA1;ETS1;KLF2;FOSL1;CST3;NET1;CYP11A1;CAT;TXNIP;CYP1B1;HMOX1;ADA
cellular ketone metabolic process (GO:0042180)	1959-12-01	0.0302179	0.546201	-1.36428	0.825075	VKORC1;CBR1;COQ3;SCP2;CYP11A1;AKR1C1;PDSS2;AKR1B1;ADM;HMGCR;ADCK3;COQ5
regulation of lipid metabolic process (GO:0019216)	36/245	0.031037	0.555206	-1.76963	1.04128	SCARB1;PRKAA1;INSIG1;CREBL2;FITM2;ABHD5;PDHB;PIK3R1;PTGS2;CYR61;LMF1;SEC14L2;PDPR;SCP2;PDK4;PPARGC1A;WDTC1;VAV3;TCF7L2;PRKAB2;ANKRD26;ANXA1;VDR;EIF2AK3;SORBS1;NR1D1;BMP5;RBL2;MLXIPL;POR;PDP2;RBL1;SNAI1;SNAI2;DHCR7;PLIN5
regulation of DNA replication (GO:0006275)	20/118	0.0310818	0.555206	-1.56027	0.918088	TSPYL2;PIF1;JUN;BLM;TIPIN;DSCC1;HUS1;DBF4B;ESCO2;BRCA2;TERF1;BMP5;CST3;CCDC88A;KITLG;MCIDAS;OBFC1;ID3;NBN;E2F7
cellular response to interferon-gamma (GO:0071346)	16/88	0.031037	0.555206	-1.46489	0.861965	PTPN1;HLA-C;HLA-A;IFI30;OASL;ICAM1;PIAS1;HLA-E;MT2A;SOCS1;IRF1;PTPN6;CD58;CAMK2G;CD44;SLC26A6
response to drug (GO:0042493)	49/354	0.0322535	0.570615	-1.79594	1.0076	CDKN1A;OGG1;LYST;AACS;ICAM1;MT2A;PNP;SMPD1;TIMP4;NKX3-1;VAV3;USP47;EDN1;ANXA1;HMGCS1;FOS;TERF1;PGF;DUSP6;POR;RPP21;TXNIP;PLIN2;CCNO;RBM22;SEMA3C;SLC1A3;LPL;TGFA;PTGS2;PPOX;THBS1;SLC9A1;CST3;CYP11A1;MYO6;PPARGC1A;ABCA1;FZD1;JUN;GGH;DHODH;FOSL1;ACER2;QDPR;TJP1;GNAS;FOSB;ADA
positive regulation of cellular protein catabolic process (GO:1903364)	13/67	0.0330618	0.570615	-1.38199	0.775353	PLK3;UQCC2;EGF;PLK2;PSEN1;CLU;PIAS1;DAB2;GCLC;ESPL1;BBS7;TRIB1;CTSC
nucleobase metabolic process (GO:0009112)	13/67	0.0330618	0.570615	-1.371	0.769185	PRPS1;GPX1;GDA;SHMT1;ADK;DCK;DHODH;PNP;IMPDH1;CAT;NT5M;ADSS;ADA
spindle organization (GO:0007051)	14/74	0.0325584	0.570615	-1.36449	0.765535	DYNC1H1;PLK2;CEP120;STARD9;NEK7;HAUS4;SPICE1;HAUS5;ESPL1;MYH9;NEK2;KIZ;SAC3D1;SPC25
cellular polysaccharide biosynthetic process (GO:0033692)	1946-10-01	0.0325538	0.570615	-1.297	0.727669	EXT1;CMAS;TP53RK;PPP1R3C;PGM2;ALG1;NR1D1;NANS;GYG1;PGM2L1
regulation of thymocyte apoptotic process (GO:0070243)	2016-05-15	0.0330719	0.570615	0.138412	-0.0776547	BLM;CASP8;ZC3H8;NFKBID;ADA
regulation of mammary gland epithelial cell proliferation (GO:0033599)	2016-05-15	0.0330719	0.570615	0.1625	-0.0911689	GPX1;ZNF703;BRCA2;HOXA5;ROBO1
response to laminar fluid shear stress (GO:0034616)	2016-05-15	0.0330719	0.570615	0.183885	-0.103167	ABCA1;SMAD6;ETS1;SREBF2;KLF2
magnesium ion transport (GO:0015693)	2016-05-15	0.0330719	0.570615	0.365756	-0.205204	NIPAL1;ZDHHC13;MAGT1;CNNM2;ZDHHC17
cellular transition metal ion homeostasis (GO:0046916)	16/89	0.03357	0.572701	-1.44877	0.807534	STEAP3;SLC46A1;SLC31A2;ABCB7;SLC30A5;MFI2;SLC11A2;TCIRG1;MCOLN1;ATOX1;NUBP1;MT2A;ATP6V1B2;HMOX1;MON1A;HMOX2
protein tetramerization (GO:0051262)	16/89	0.03357	0.572701	-1.38236	0.770517	VASP;SHMT1;DCXR;IDE;HMGCR;SAMHD1;GLS;THG1L;CTH;CAT;PDSS2;ALDOC;DNM1L;SBF2;ACADS;DECR1
regulation of cyclin-dependent protein serine/threonine kinase activity (GO:0000079)	16/89	0.03357	0.572701	-1.34762	0.751151	CDKN2B;CDKN1A;BLM;CDKN2C;GADD45A;FAM58A;CDC25C;LATS1;CCNB2;HHEX;SERTAD1;CCNE2;APC;CCNYL1;CCNO;CDKN3
regulation of Rho GTPase activity (GO:0032319)	27/174	0.0338026	0.574518	-1.5643	0.866971	FICD;ARHGEF28;ICAM1;ALS2CL;OPHN1;EPS8L1;RICTOR;SH3BGRL3;VAV3;ARFGEF1;BCAS3;JUN;ARHGEF17;CEP152;ARHGAP29;ARHGAP27;ARAP1;GMIP;ARHGAP24;NET1;BCL6;SPATA13;TBC1D7;ARHGEF3;CDC42EP2;ARHGEF5;EPHA2
glucose homeostasis (GO:0042593)	23/143	0.0349328	0.579213	-1.56013	0.851963	TCF7L2;ANKRD26;PRKAA1;ERO1LB;GK;IGFBP5;WFS1;PRCP;PYGL;FOXO3;SLC8B1;USF1;FOXO1;AACS;ICAM1;TJP1;MLXIPL;UCP2;CRY1;PDK4;PPARGC1A;SOX4;PCK2
carbohydrate homeostasis (GO:0033500)	23/143	0.0349328	0.579213	-1.55748	0.850516	TCF7L2;ANKRD26;PRKAA1;ERO1LB;GK;IGFBP5;WFS1;PRCP;PYGL;FOXO3;SLC8B1;USF1;FOXO1;AACS;ICAM1;TJP1;MLXIPL;UCP2;CRY1;PDK4;PPARGC1A;SOX4;PCK2
monosaccharide catabolic process (GO:0046365)	1940-09-01	0.0352233	0.579213	-1.17071	0.639305	RPIA;GALT;HIBADH;FUT10;DHDH;PGM2;PGD;PGM2L1;XYLB
temperature homeostasis (GO:0001659)	2016-07-27	0.0345712	0.579213	-0.8748	0.477714	GPX1;EDN2;ARRDC3;NR1D1;ADRB2;PPARGC1A;FOXO1
C21-steroid hormone metabolic process (GO:0008207)	2016-06-21	0.0348844	0.579213	-0.503793	0.275113	STARD5;SCP2;CYP11A1;AKR1C1;AKR1B1;ADM
regulation of insulin-like growth factor receptor signaling pathway (GO:0043567)	2016-06-21	0.0348844	0.579213	-0.483919	0.264261	IFT88;IGFBP5;IGFBP3;KIAA1161;BMP5;NKX3-1
protein destabilization (GO:0031648)	2016-06-21	0.0348844	0.579213	-0.461797	0.25218	ID1;SIAH1;BTRC;TRIM21;CDC73;ISOC2
regulation of viral-induced cytoplasmic pattern recognition receptor signaling pathway (GO:0039531)	2016-04-10	0.0351731	0.579213	2.73162	-1.49169	TRIM15;ZC3HAV1;DDX60;BIRC3
sphingosine metabolic process (GO:0006670)	2016-04-10	0.0351731	0.579213	2.84079	-1.55131	ACER2;SPTLC2;ACER3;GBA
positive regulation of protein processing (GO:0010954)	35/240	0.0359627	0.580273	-1.66239	0.904764	HIP1;PCOLCE2;MFI2;NOD1;PSEN1;UACA;CLU;CYR61;ROBO1;CTGF;BCL2L13;CASP8;BCL2L11;PERP;CASP1;BBS7;BTRC;CTSC;TBC1D10A;NKX3-1;PLK3;EGLN3;CRADD;EGF;WFS1;RHBDD1;PLK2;SLC11A2;EIF2AK3;PIAS1;ACER2;DAB2;GCLC;ESPL1;TRIB1
positive regulation of protein maturation (GO:1903319)	35/240	0.0359627	0.580273	-1.65977	0.903339	HIP1;PCOLCE2;MFI2;NOD1;PSEN1;UACA;CLU;CYR61;ROBO1;CTGF;BCL2L13;BCL2L11;CASP8;PERP;CASP1;BBS7;BTRC;CTSC;TBC1D10A;NKX3-1;PLK3;EGLN3;CRADD;WFS1;EGF;PLK2;RHBDD1;SLC11A2;EIF2AK3;PIAS1;ACER2;DAB2;GCLC;ESPL1;TRIB1
mitotic nuclear division (GO:0007067)	35/240	0.0359627	0.580273	-1.58691	0.863684	ERCC6L;CEP164;NEDD9;CASC5;YEATS4;AURKB;CENPC;CCNB2;KATNA1;NEK2;FAM83D;SAC3D1;CEP55;CLASP2;TIPIN;NDE1;HAUS4;KLHL21;HAUS5;TERF1;CDC25C;GEM;CDC25B;CD2AP;LATS1;ZC3HC1;DYNC1LI1;MIS18A;ANAPC4;FAM64A;KIF2C;ANAPC5;SPC24;MAD1L1;SPC25
response to ketone (GO:1901654)	18/105	0.0361729	0.580273	-1.50364	0.818366	EDN1;CDKN1A;GBA;FOS;HOXB13;FBXO32;THBS1;AACS;FOSL1;TGFBR3;CYP11A1;GNAS;FOSB;TXNIP;SMYD3;CALM1;DCPS;NKX3-1
negative regulation of viral process (GO:0048525)	14/75	0.0354502	0.580273	-1.30471	0.710097	SRPK2;APOBEC3C;IFITM1;JUN;ZC3HAV1;OASL;ISG20;TNIP1;SLPI;TRIM5;TRIM14;TRIM15;TRIM59;TRIM21
polysaccharide biosynthetic process (GO:0000271)	1947-10-01	0.0363069	0.580273	-1.1902	0.647772	EXT1;CMAS;TP53RK;PPP1R3C;PGM2;ALG1;NR1D1;NANS;GYG1;PGM2L1
chaperone-mediated protein folding (GO:0061077)	1947-10-01	0.0363069	0.580273	-1.16354	0.633265	UNC45A;TOR3A;TOR2A;TOR1A;PEX19;FKBP14;TOR1B;CLU;PDIA4;ERO1L
fatty acid beta-oxidation (GO:0006635)	1947-10-01	0.0363069	0.580273	-1.11686	0.607857	ABCD3;AMACR;ECHS1;PCCA;SCP2;MMAA;EHHADH;ACADS;PPARD;DECR1
double-strand break repair via homologous recombination (GO:0000724)	1961-12-01	0.0366032	0.582964	-1.26675	0.683575	BLM;RAD51D;ZFYVE26;SLX4;WDR48;TONSL;HUS1;RPA2;NABP1;NBN;BRCA2;RAD54B
establishment of organelle localization (GO:0051656)	26/168	0.0376296	0.597117	-1.53057	0.789229	STX12;GPSM2;PRKCZ;SYNE2;BLOC1S6;PCLO;OPHN1;KIF3A;BBS7;KIFAP3;MYH10;CDK5RAP2;BBS2;SNAPIN;TOR1A;CEP152;CACFD1;NDE1;SPICE1;AP3B1;AP3B2;GEM;CENPE;ESPL1;MYH9;HAP1
regulation of DNA-dependent DNA replication (GO:0090329)	1934-08-01	0.0377541	0.597117	-1.03099	0.53162	TIPIN;BLM;DBF4B;NBN;BRCA2;TERF1;E2F7;BMP5
cellular response to nutrient levels (GO:0031669)	17/99	0.0404279	0.611791	-1.42809	0.701712	TCF7L2;CDKN2B;JUN;PRKAA1;BMPR2;HSPA5;VDR;RNASE4;USF1;FOXO1;ICAM1;NUAK2;UCP2;ATG2A;PDK4;HMOX1;CPEB4
recombinational repair (GO:0000725)	1962-12-01	0.0401297	0.611791	-1.25742	0.617851	RAD51D;ZFYVE26;BLM;SLX4;WDR48;TONSL;HUS1;NABP1;RPA2;NBN;BRCA2;RAD54B
lysosomal transport (GO:0007041)	1948-10-01	0.0403497	0.611791	-1.18125	0.580422	FAM160A2;ZFYVE16;SNAPIN;SNX16;SNX27;AKTIP;AP3B1;GCC2;ADRB2;USE1
regulation of alcohol biosynthetic process (GO:1902930)	1941-09-01	0.0395385	0.611791	-1.1332	0.556815	SEC14L2;PRKAA1;POR;HRH1;VDR;SNAI1;SNAI2;DHCR7;BMP5
thymus development (GO:0048538)	1941-09-01	0.0395385	0.611791	-1.11291	0.546843	CCNB2;MAFB;BCL2L11;APC;LMO4;SIX1;HES1;PSEN1;JARID2
response to fluid shear stress (GO:0034405)	2016-07-28	0.0398626	0.611791	-0.907595	0.445959	ABCA1;IFT88;P2RX4;SMAD6;ETS1;SREBF2;KLF2
dopamine metabolic process (GO:0042417)	2016-07-28	0.0398626	0.611791	-0.887385	0.436029	NR4A2;GPR37;GCH1;SPR;NPR1;MAOA;CHRNA7
response to mineralocorticoid (GO:0051385)	2016-07-28	0.0398626	0.611791	-0.799402	0.392798	FOSL1;CDKN1A;CYP11A1;FOSB;FOS;CALM1;CTGF
heme metabolic process (GO:0042168)	2016-07-28	0.0398626	0.611791	-0.770524	0.378608	ALAD;ALAS1;SLC11A2;BLVRB;HMOX1;PPOX;HMOX2
negative regulation of smooth muscle cell proliferation (GO:0048662)	2016-07-28	0.0398626	0.611791	-0.763393	0.375104	IGFBP5;NPR1;IGFBP3;HMOX1;MFN2;TRIB1;PPARD
cytokinetic process (GO:0032506)	2016-05-16	0.0401791	0.611791	0.500136	-0.245749	BIN3;SPAST;UNC119;GTPBP8;AURKB
purine deoxyribonucleotide metabolic process (GO:0009151)	2016-05-16	0.0401791	0.611791	0.506812	-0.249029	OGG1;ADK;NUDT15;SAMHD1;ADA
nucleotide-sugar biosynthetic process (GO:0009226)	2016-05-16	0.0401791	0.611791	0.543578	-0.267095	PMM1;SLC35D1;GFPT2;MPI;UAP1
apoptotic signaling pathway (GO:0097190)	45/327	0.041738	0.616421	-1.61602	0.781871	CDKN1A;HIP1;TM2D1;XPA;PIK3R1;BRCA2;FOXO3;AATF;UACA;CRIP1;CLU;ERO1L;DEDD2;POLB;CASP8;BCL2L11;YWHAQ;CASP10;PERP;TMEM109;HMOX1;CYP1B1;ITGAV;NBN;IKBKE;VAV3;WWOX;GPX1;TNFRSF12A;CRADD;ARHGEF17;BNIP3;EIF2AK3;KRT8;ESR2;NET1;KITLG;P2RX4;MSH2;DDIT3;SELK;DNAJC10;ARHGEF3;PPARD;EPHA2
mitochondrion organization (GO:0007005)	27/179	0.0440173	0.616421	-1.57374	0.761414	PIF1;MTFP1;CNP;EPAS1;IFI6;OMA1;CLN8;ALKBH7;CLU;SLC9A1;BCL2L11;MAN2A1;MFN1;THEM4;MFN2;PIM2;DNM1L;PPARGC1A;JUN;MAP3K1;BIK;ELAC2;BNIP3;GDAP1;GCLC;MTFR1;MTFR2
cellular component assembly involved in morphogenesis (GO:0010927)	28/186	0.0416614	0.616421	-1.573	0.761058	SPEF2;CEP164;FBF1;CASC5;TPGS1;RPGR;TTBK2;DYNC2LI1;ABLIM1;ARL13B;MCIDAS;KIF3A;TCTN2;TMEM107;DZIP1L;FOPNL;BBS7;MYH10;RAB8B;BBS2;IFT140;WDR19;MPP5;IFT88;BBS10;TMEM216;TTC30A;CCNO
actin filament-based process (GO:0030029)	42/303	0.0439115	0.616421	-1.56842	0.758842	EPB41;TESK2;RND3;PRKCZ;SYNE2;EPS8;ATXN3;SDCBP;SLC9A3R1;CYTH2;NUAK2;SCIN;OPHN1;EPB41L2;MYO6;MICALL2;PRKCDBP;FLNB;RICTOR;MYH10;PDLIM7;PHACTR4;VASP;PTPN1;MON2;GAS2L3;ARHGEF17;KRT8;PARVA;FMNL3;MYO1E;MYL6;FMNL2;DIAPH3;BCL6;DAAM1;FSCN1;CDC42EP2;MYH9;VIM;CORO7;ARHGEF5
positive regulation of proteolysis (GO:0045862)	33/228	0.044026	0.616421	-1.55925	0.754407	HIP1;PCOLCE2;NOD1;PSEN1;UACA;CLU;CYR61;ROBO1;CTGF;BCL2L13;CASP8;BCL2L11;PERP;CASP1;BBS7;BTRC;CTSC;TBC1D10A;NKX3-1;PLK3;EGLN3;CRADD;EGF;WFS1;PLK2;SLC11A2;EIF2AK3;PIAS1;ACER2;DAB2;GCLC;ESPL1;TRIB1
regulation of stress-activated MAPK cascade (GO:0032872)	26/170	0.0418971	0.616421	-1.55492	0.75231	ULK4;DUSP19;NOD1;HMGCR;FOXO1;SH3RF1;CTGF;SDCBP;DUSP10;MAP3K6;MAP3K4;EDN1;MAP3K1;DUSP3;GADD45B;GADD45A;RIPK2;GAB1;MID1;DUSP22;PER1;DAB2;TAOK3;MDFIC;ZNF675;MYD88
regulation of stress-activated protein kinase signaling cascade (GO:0070302)	26/171	0.0441604	0.616421	-1.5424	0.746254	ULK4;DUSP19;NOD1;HMGCR;FOXO1;SH3RF1;CTGF;SDCBP;DUSP10;MAP3K6;MAP3K4;EDN1;MAP3K1;DUSP3;GADD45B;GADD45A;RIPK2;GAB1;MID1;DUSP22;PER1;DAB2;MDFIC;TAOK3;ZNF675;MYD88
actin cytoskeleton organization (GO:0030036)	36/253	0.0443298	0.616421	-1.5387	0.744464	EPB41;TESK2;RND3;PRKCZ;EPS8;ATXN3;SDCBP;SLC9A3R1;CYTH2;NUAK2;OPHN1;EPB41L2;MICALL2;PRKCDBP;FLNB;RICTOR;MYH10;PDLIM7;PHACTR4;VASP;PTPN1;MON2;GAS2L3;ARHGEF17;KRT8;PARVA;FMNL3;FMNL2;DIAPH3;BCL6;DAAM1;FSCN1;CDC42EP2;MYH9;CORO7;ARHGEF5
cell morphogenesis involved in differentiation (GO:0000904)	23/147	0.0441046	0.616421	-1.45721	0.705035	CLIC4;MAP3K1;MSX2;SLC1A3;PARVA;LRP6;LOXL2;TGFBR3;IFT88;DAB2;SPR;ARL13B;RILPL2;ID1;SNAI1;MICALL2;SNAI2;MYH9;ITGAV;S100A4;HES1;FERMT2;EPHA2
cholesterol metabolic process (GO:0008203)	18/107	0.0415123	0.616421	-1.38234	0.668813	ABCA1;IDI1;SCARB1;PRKAA1;HMGCS1;INSIG1;HMGCR;CLN8;HSD17B7;SREBF2;SQLE;EBP;CYP11A1;CAT;PMVK;FDXR;DHCR7;PPARD
liposaccharide metabolic process (GO:1903509)	17/100	0.0433618	0.616421	-1.37647	0.66597	PIGU;PGAP1;CMAS;TP53RK;HEXB;GBA;NAGA;ALG1;SUMF1;NEU3;GM2A;SMPD1;PIGA;ARSJ;NEU1;NANS;PIGH
response to interferon-gamma (GO:0034341)	18/108	0.0443857	0.616421	-1.33997	0.648314	PTPN1;IFITM1;GCH1;HLA-C;HLA-A;IFI30;ICAM1;OASL;PIAS1;HLA-E;MT2A;SOCS1;IRF1;PTPN6;CD58;CAMK2G;CD44;SLC26A6
alpha-amino acid catabolic process (GO:1901606)	16/92	0.0420731	0.616421	-1.31549	0.63647	MCCC2;GOT1;HIBADH;SHMT1;MCCC1;ASRGL1;GCAT;GLS;QDPR;PDPR;AUH;IVD;ASL;ALDH7A1;HIBCH;DTD2
negative regulation of cell-substrate adhesion (GO:0010812)	1942-09-01	0.0441983	0.616421	-1.04053	0.503435	ACER2;BCAS3;BCL6;MFI2;SERPINE1;GCNT2;AP1AR;PIK3R1;THBS1
termination of signal transduction (GO:0023021)	1942-09-01	0.0441983	0.616421	-0.960546	0.464737	RGS2;RGS3;SMPD1;RGS16;GBA;RGS10;RGS20;SNX13;MYH9
cartilage morphogenesis (GO:0060536)	2016-04-11	0.044523	0.616421	2.14913	-1.0398	SNAI1;SNAI2;HOXA5;LRP6
response to follicle-stimulating hormone (GO:0032354)	2016-04-11	0.044523	0.616421	2.40094	-1.16164	TGFBR3;POR;HMGCS1;CYP11A1
dopamine biosynthetic process (GO:0042416)	2016-04-11	0.044523	0.616421	2.52485	-1.22158	NR4A2;GPR37;GCH1;CHRNA7
antigen processing and presentation of endogenous peptide antigen (GO:0002483)	2016-04-11	0.044523	0.616421	2.60342	-1.2596	ERAP1;HLA-C;HLA-A;HLA-E
purine deoxyribonucleoside triphosphate metabolic process (GO:0009215)	2016-04-11	0.044523	0.616421	2.77098	-1.34067	ADK;SAMHD1;NUDT15;ADA
negative regulation of Ras GTPase activity (GO:0034261)	2016-04-11	0.044523	0.616421	2.77294	-1.34162	ARFGEF1;BCAS3;FICD;GMIP
regulation of energy homeostasis (GO:2000505)	2016-04-11	0.044523	0.616421	2.82304	-1.36586	MLXIPL;PRKAA1;PPARGC1A;FOXO1
regulation of integrin-mediated signaling pathway (GO:2001044)	2016-04-11	0.044523	0.616421	2.88488	-1.39578	DAB2;EMP2;TIMP1;PHACTR4
diol metabolic process (GO:0034311)	2016-04-11	0.044523	0.616421	2.98299	-1.44325	ACER2;SPTLC2;ACER3;GBA
establishment of protein localization to vacuole (GO:0072666)	2016-04-11	0.044523	0.616421	3.04573	-1.4736	ZFYVE16;SNX16;AP3B1;GCC2
ubiquinone biosynthetic process (GO:0006744)	2016-04-11	0.044523	0.616421	3.08577	-1.49297	COQ3;PDSS2;ADCK3;COQ5
protein targeting to lysosome (GO:0006622)	2016-04-11	0.044523	0.616421	3.10971	-1.50456	ZFYVE16;SNX16;AP3B1;GCC2
protein targeting to vacuole (GO:0006623)	2016-04-11	0.044523	0.616421	3.14539	-1.52182	ZFYVE16;SNX16;AP3B1;GCC2
ribonucleoside monophosphate metabolic process (GO:0009161)	55/416	0.047278	0.619456	-1.55253	0.743527	ABCD4;ABCD3;EIF4A3;DDX12P;ADK;IDE;TOP1MT;KIF21A;TOR3A;ABCC5;STARD9;DDX10;CHD1L;MYL6;RAD51D;MSH2;ATP6V1B2;MYH9;KIF2C;UPRT;PRPS2;PRPS1;PIF1;BLM;DDX27;ABCB7;YTHDC2;AK1;ABCB8;ABCB9;RAD54B;SPAST;KIF3A;KATNA1;LONRF3;KIF3C;MYH10;ADSS;SLC25A25;ATF7IP;ABCA1;DYNC1H1;TOR1A;HSPA5;ABCA5;MYO10;HSPA6;GTF2H2;TOR1B;SMARCA2;DHODH;MYO1E;CENPE;IMPDH1;ADA
regulation of cysteine-type endopeptidase activity (GO:2000116)	29/197	0.047969	0.619456	-1.47036	0.704177	TNFAIP8;HIP1;IFI6;NOD1;UACA;THBS1;CYR61;SH3RF1;ROBO1;CTGF;BCL2L13;CASP8;BCL2L11;PERP;CASP1;TBC1D10A;NKX3-1;USP47;EGLN3;GPX1;CRADD;SLC11A2;MKL1;EIF2AK3;ACER2;NR4A1;POR;CD44;BIRC3
response to purine-containing compound (GO:0014074)	21/132	0.0462108	0.619456	-1.45753	0.698032	JUN;PRKAA1;IGFBP5;HMGCS1;SDC2;BCKDHB;ITPR2;PLAT;FOS;PTGS2;AACS;DHODH;PANX1;FOSL1;P2RX4;CYP11A1;NDUFS4;CASP1;FOSB;ADSS;SLC26A6
regulation of I-kappaB kinase/NF-kappaB signaling (GO:0043122)	31/213	0.0470731	0.619456	-1.45172	0.695248	SLC20A1;HSPB1;NOD1;ZC3HAV1;PTGS2;UACA;CASP8;TRIM5;CASP10;CASP1;HMOX1;PIM2;BTRC;IKBKE;WLS;RIPK2;PLK2;ZDHHC13;C9ORF89;ZDHHC17;PER1;PPM1B;TNIP1;CTH;PELI1;TRIM59;S100A4;TRIM38;NFKBID;MYD88;BIRC3
regulation of JNK cascade (GO:0046328)	23/148	0.0466494	0.619456	-1.4355	0.687482	EDN1;MAP3K1;DUSP3;GADD45B;GADD45A;RIPK2;ULK4;GAB1;DUSP19;NOD1;SH3RF1;CTGF;DUSP22;PER1;SDCBP;DAB2;DUSP10;TAOK3;MDFIC;MAP3K6;ZNF675;MAP3K4;MYD88
cell cycle checkpoint (GO:0000075)	24/156	0.0466951	0.619456	-1.42047	0.680282	PLK3;BLM;CDKN2B;TIPIN;PLK2;UBE2D1;HUS1;RPA2;CASC5;TERF1;ZWINT;AURKB;APC;CCNE2;MSH2;TAOK3;PEA15;CHMP4C;NABP1;ANAPC4;ANAPC5;NBN;MAD1L1;RAD9A
xenobiotic metabolic process (GO:0006805)	24/156	0.0466951	0.619456	-1.38761	0.664546	GSTM4;SLC26A2;GSTM1;ACSS2;SLC35D1;MAOA;MGST3;AKR1C1;AIP;GSTT1;MTR;AHR;PAPSS2;PAPSS1;SULT1A1;GCLC;NCEH1;GSTA4;NAT1;CYP11A1;CYP2S1;CYP2R1;CYP1B1;BPNT1
cellular response to unfolded protein (GO:0034620)	15/86	0.0470692	0.619456	-1.21375	0.581281	TSPYL2;PTPN1;HSPA5;FKBP14;WFS1;RHBDD1;EIF2AK3;PARP16;ERO1L;DNAJC3;CTH;DDIT3;LMNA;ATF6;ATF3
response to interleukin-1 (GO:0070555)	13/71	0.0466494	0.619456	-1.16576	0.558299	EDN1;ANXA1;RIPK2;IL1R1;YTHDC2;ETS1;KLF2;ICAM1;RPS6KA5;CYP11A1;IRAK2;MYD88;NKX3-1
tissue remodeling (GO:0048771)	13/71	0.0466494	0.619456	-1.14654	0.549095	NOTCH2;BMPR2;JAG1;ANXA1;IGFBP5;SEMA3C;EPAS1;LRP6;DLL4;ELF3;CSPG4;LGR4;EPHA2
ceramide metabolic process (GO:0006672)	1964-12-01	0.0478815	0.619456	-1.13864	0.545312	ACER2;PLA2G15;NEU3;CERS6;SPTLC2;GM2A;SMPD1;HEXB;GBA;ACER3;NAGA;CLN8
fatty acid catabolic process (GO:0009062)	1964-12-01	0.0478815	0.619456	-0.977583	0.468178	PLA2G15;ABCD3;AMACR;ACOT7;ECHS1;PCCA;MMAA;SCP2;EHHADH;ACADS;DECR1;PPARD
deoxyribonucleotide metabolic process (GO:0009262)	1936-08-01	0.0481411	0.619456	-0.710987	0.340501	DTYMK;OGG1;ADK;NT5M;NUDT15;SAMHD1;ADA;CCNO
response to cold (GO:0009409)	1936-08-01	0.0481411	0.619456	-0.701996	0.336195	PRKAA1;CASP8;LPL;ADM;FOS;ADRB2;PPARGC1A;FOXO1
regulation of fatty acid biosynthetic process (GO:0042304)	2016-07-29	0.0456552	0.619456	-0.651362	0.311946	MLXIPL;PRKAB2;ANXA1;INSIG1;PDK4;PTGS2;WDTC1
blood vessel endothelial cell migration (GO:0043534)	2016-06-23	0.0477902	0.619456	-0.269563	0.129098	NR4A1;SCARB1;GPX1;ID1;MYH9;ROBO1
response to corticosterone (GO:0051412)	2016-06-23	0.0477902	0.619456	-0.121759	0.0583121	FOSL1;CDKN1A;CYP11A1;FOSB;FOS;CALM1
isoprenoid biosynthetic process (GO:0008299)	2016-06-23	0.0477902	0.619456	-0.113041	0.054137	IDI1;ALDH1A3;HMGCS1;PDSS2;HMGCR;ISPD
muscle cell migration (GO:0014812)	2016-05-17	0.0481421	0.619456	0.763575	-0.365686	NET1;BIN3;SIX1;PLAT;PARVA
regulation of sulfur metabolic process (GO:0042762)	2016-05-17	0.0481421	0.619456	0.77903	-0.373088	TCF7L2;PDP2;PDPR;PDK4;PDHB
purine nucleoside bisphosphate biosynthetic process (GO:0034033)	2016-05-17	0.0481421	0.619456	0.856182	-0.410037	SLC26A2;ACOT7;PANK3;PAPSS2;PAPSS1
ribonucleoside bisphosphate biosynthetic process (GO:0034030)	2016-05-17	0.0481421	0.619456	0.862899	-0.413254	SLC26A2;ACOT7;PANK3;PAPSS2;PAPSS1
nucleoside bisphosphate biosynthetic process (GO:0033866)	2016-05-17	0.0481421	0.619456	0.896522	-0.429356	SLC26A2;ACOT7;PANK3;PAPSS2;PAPSS1
purine ribonucleoside bisphosphate metabolic process (GO:0034035)	2016-05-17	0.0481421	0.619456	0.910492	-0.436047	SULT1A1;SLC26A2;BPNT1;PAPSS2;PAPSS1
3'-phosphoadenosine 5'-phosphosulfate metabolic process (GO:0050427)	2016-05-17	0.0481421	0.619456	0.945725	-0.45292	SULT1A1;SLC26A2;BPNT1;PAPSS2;PAPSS1
macromolecule glycosylation (GO:0043413)	37/264	0.0495183	0.619659	-1.45549	0.696579	GALNT11;CCDC126;GALNT18;FUT10;GCNT1;MPI;UAP1;MAGT1;PSEN1;ART5;UBE2J1;LMF1;MAN1A2;MAN2A1;GCNT2;MAN1A1;UGGT2;ST3GAL1;EDEM3;PMM1;PARP1;ALG6;GFPT2;EDEM2;SRD5A3;C1GALT1;ALG14;SIRT5;PARP16;ALG1;ALG10;EXT1;EOGT;ISPD;B4GALT7;ALG10B;B4GALT4
protein glycosylation (GO:0006486)	37/264	0.0495183	0.619659	-1.45294	0.695359	GALNT11;CCDC126;GALNT18;FUT10;GCNT1;MPI;UAP1;MAGT1;PSEN1;ART5;UBE2J1;LMF1;MAN1A2;MAN2A1;GCNT2;MAN1A1;UGGT2;ST3GAL1;EDEM3;PMM1;PARP1;ALG6;GFPT2;EDEM2;SRD5A3;C1GALT1;ALG14;SIRT5;PARP16;ALG1;ALG10;EXT1;EOGT;ISPD;B4GALT7;ALG10B;B4GALT4
protein maturation (GO:0051604)	32/222	0.0487168	0.619659	-1.41677	0.678046	ERO1LB;HIP1;NOD1;PLAT;OMA1;PSEN1;PCSK5;CLN5;ERO1L;LMF1;ROBO1;BCL2L13;CASP8;PRDX4;BCL2L11;PERP;CASP1;CAPN2;AGA;TBC1D10A;NKX3-1;EGLN3;PARP1;CRADD;WFS1;SLC11A2;EIF2AK3;AIP;DISP1;ACER2;TSPAN14;NMT2
response to reactive oxygen species (GO:0000302)	22/141	0.0492153	0.619659	-1.35829	0.650057	PLK3;JUN;PRKAA1;GPX1;ANXA1;BNIP3;FOS;HBA1;PTPRK;ETS1;KLF2;FOXO1;CST3;NET1;FOSL1;CYP11A1;CAT;UCP2;HMOX1;TXNIP;CYP1B1;ADA
positive regulation of Rho GTPase activity (GO:0032321)	23/149	0.0492992	0.619659	-1.30317	0.62368	VAV3;BCAS3;JUN;ARHGEF17;CEP152;ARHGEF28;ARHGAP29;ARHGAP27;ARAP1;GMIP;ARHGAP24;ICAM1;NET1;ALS2CL;OPHN1;SPATA13;TBC1D7;ARHGEF3;CDC42EP2;EPS8L1;SH3BGRL3;ARHGEF5;EPHA2
ER-nucleus signaling pathway (GO:0006984)	16/94	0.0485348	0.619659	-1.19804	0.573366	TSPYL2;PTPN1;HSPA5;FKBP14;WFS1;INSIG1;ATG10;EIF2AK3;PARP16;ERO1L;DNAJC3;DDIT3;CTH;LMNA;ATF6;ATF3
vacuolar transport (GO:0007034)	1950-10-01	0.0493366	0.619659	-0.955071	0.457084	FAM160A2;ZFYVE16;SNAPIN;SNX16;SNX27;AKTIP;AP3B1;GCC2;ADRB2;USE1
homotypic cell-cell adhesion (GO:0034109)	1957-11-01	0.0488245	0.619659	-0.912274	0.436601	STK10;RAP2B;STXBP3;PPAP2B;STXBP1;GNAS;MYH9;HSPB1;PTPN6;CD44;VCL
catechol-containing compound metabolic process (GO:0009712)	1943-09-01	0.0492114	0.619659	-0.854104	0.408762	NR4A2;SULT1A1;GPR37;SPR;GCH1;NPR1;EPAS1;MAOA;CHRNA7
catecholamine metabolic process (GO:0006584)	1943-09-01	0.0492114	0.619659	-0.850221	0.406904	NR4A2;SULT1A1;GPR37;SPR;GCH1;NPR1;EPAS1;MAOA;CHRNA7
phospholipid biosynthetic process (GO:0008654)	30/206	0.0498065	0.621557	-1.34112	0.637737	IDI1;PI4K2B;PIGU;MTMR3;HEXB;SGMS2;ABHD5;PIK3R1;AGPAT4;SPTLC2;IMPA1;PMVK;INPP5J;SH3GLB1;DGAT1;PNPLA8;SRD5A3;MBOAT1;PLA2G4A;SYNJ2;PLA2G16;LPCAT3;ETNK1;PIGA;LPCAT2;PNPLA3;LPIN3;SERINC5;PPARD;PIGH
smoothened signaling pathway (GO:0007224)	13/72	0.0505745	0.629417	-1.0671	0.494025	STIL;WDR19;TULP3;DISP1;TTBK2;IFT88;ARL13B;PTCHD2;KIF3A;TTC21B;TCTN2;HES1;BBS7
cellular response to cytokine stimulus (GO:0071345)	61/471	0.0518812	0.631377	-1.50731	0.69314	IFITM1;EIF4A3;MT1X;IL1RAP;IFI35;IFI30;ICAM1;OASL;IL27RA;ALAD;MT2A;RPS6KA5;NKX3-1;IFNAR2;EDN1;EDN2;IL1R1;SLC11A2;GAB1;KRT8;HLA-C;TYK2;HLA-A;IL17RC;HLA-E;IL17RA;PIAS1;PPM1B;IRF1;ZNF675;CD44;TNFRSF21;MCM2;GALT;GBA;CTR9;IFI6;CXCR4;MST1R;CSF2RA;THBS1;ADIPOR2;USP18;SOCS1;IRAK2;CYP11A1;FLNB;CD58;CAMK2G;PPARGC1A;BBS2;PTPN1;HSPA5;STAT2;KLF2;ISG20;NUP35;PTPN6;EIF4G2;MYD88;SLC26A6
response to transforming growth factor beta (GO:0071559)	25/166	0.0517613	0.631377	-1.34531	0.618642	SERPINE1;UBE2D1;PTPRK;F11R;PRKCZ;CYP11A1;GCNT2;WWOX;CDKN2B;JUN;MAP3K1;PARP1;GDF15;FOS;SMAD6;RUNX1;DUSP22;TGFBR3;DAB2;RBL1;TFDP2;BAMBI;ID1;TAB1;FERMT2
cellular response to transforming growth factor beta stimulus (GO:0071560)	25/166	0.0517613	0.631377	-1.34277	0.617474	SERPINE1;UBE2D1;PTPRK;F11R;PRKCZ;CYP11A1;GCNT2;WWOX;CDKN2B;JUN;MAP3K1;PARP1;GDF15;FOS;SMAD6;RUNX1;DUSP22;TGFBR3;DAB2;RBL1;TFDP2;BAMBI;ID1;TAB1;FERMT2
cellular response to radiation (GO:0071478)	20/126	0.0516432	0.631377	-1.27131	0.584613	USP47;CDKN1A;BLM;TMEM161A;GADD45A;RHBDD1;ACTR5;HUS1;PIK3R1;PTPRK;PTGS2;CRIP1;AURKB;NET1;CRY1;TMEM109;NMT2;SNAI2;CALM1;RAD9A
transforming growth factor beta receptor signaling pathway (GO:0007179)	21/134	0.051919	0.631377	-1.25742	0.578228	CDKN2B;JUN;MAP3K1;PARP1;GDF15;SERPINE1;UBE2D1;FOS;PTPRK;F11R;SMAD6;PRKCZ;DUSP22;TGFBR3;RBL1;TFDP2;BAMBI;ID1;GCNT2;TAB1;FERMT2
positive regulation of stress-activated MAPK cascade (GO:0032874)	19/118	0.0511981	0.631377	-1.24029	0.570353	EDN1;MAP3K1;GADD45B;GADD45A;RIPK2;GAB1;DUSP19;NOD1;HMGCR;MID1;CTGF;DUSP22;SDCBP;DAB2;TAOK3;MDFIC;MAP3K6;MAP3K4;MYD88
microtubule-based transport (GO:0010970)	16/95	0.0520144	0.631377	-1.19555	0.549776	SNAPIN;IFT140;CEP152;NDE1;WDR19;AP3B1;AP3B2;PRKCZ;RPGR;BLOC1S6;KIF3A;TTC21B;TTC30A;KIF3C;HAP1;KIFAP3
regulation of cytokine-mediated signaling pathway (GO:0001959)	16/95	0.0520144	0.631377	-1.14895	0.528347	IFNAR2;PTPN1;EDN1;RIPK2;STAT2;TYK2;VRK2;USP18;ROBO1;PIAS1;SIGIRR;RABGEF1;SOCS1;IRAK2;PTPN6;ZNF675
negative regulation of NF-kappaB transcription factor activity (GO:0032088)	1965-12-01	0.052118	0.631377	-0.97076	0.446406	RWDD3;BRMS1;IRAK2;ANXA4;CAT;PELI1;CYP1B1;COMMD1;COMMD6;NFKBID;TRIM21;ZNF675
positive regulation of proteolysis involved in cellular protein catabolic process (GO:1903052)	1965-12-01	0.052118	0.631377	-0.964133	0.443359	PLK3;DAB2;GCLC;ESPL1;EGF;PLK2;PSEN1;BBS7;TRIB1;CLU;CTSC;PIAS1
lipid catabolic process (GO:0016042)	33/232	0.0525098	0.634436	-1.35204	0.615205	SCARB1;ABCD3;ECHS1;HEXB;GBA;LPL;ABHD5;HSD17B11;NEU3;GM2A;SCP2;SMPD1;NEU1;CYP1B1;ACADS;DECR1;ACOT7;MMAA;PNPLA8;SRD5A3;PLA2G4A;NAGA;PLA2G15;PLA2G16;NCEH1;AMACR;PCCA;EHHADH;PNPLA3;NAPEPLD;PPT1;SMPDL3A;PPARD
regulation of protein complex disassembly (GO:0043244)	14/80	0.0527099	0.635168	-1.13604	0.515609	BNIP3;EIF5A2;MID1;AURKB;EPS8;LIMA1;MTRF1;SPAST;SCIN;APC;SH3BGRL3;NES;SPTAN1;CLASP2
cytokine-mediated signaling pathway (GO:0019221)	46/342	0.0529303	0.636141	-1.43674	0.649889	IFITM1;GALT;EIF4A3;CTR9;IFI6;CXCR4;IFI35;IL1RAP;MST1R;IFI30;CSF2RA;ADIPOR2;USP18;ICAM1;OASL;IL27RA;MT2A;RPS6KA5;SOCS1;IRAK2;FLNB;CAMK2G;IFNAR2;BBS2;PTPN1;EDN2;IL1R1;STAT2;KRT8;GAB1;HLA-C;TYK2;HLA-A;IL17RC;HLA-E;IL17RA;PIAS1;ISG20;PPM1B;IRF1;NUP35;PTPN6;ZNF675;CD44;EIF4G2;MYD88
regulation of epithelial cell proliferation (GO:0050678)	36/258	0.0545645	0.641565	-1.46474	0.650116	CDKN1C;GRN;NRP2;BMPR2;WDR48;C5AR2;TGFA;PTPRK;BRCA2;THBS1;CDC73;LRP6;SAV1;ROBO1;KIF3A;ZNF703;RICTOR;HOXA5;NKX3-1;TCF7L2;OSR2;JUN;CDKN2B;GPX1;VDR;VASH2;ESR2;PGF;BMP5;TGFBR3;PDCL3;NR4A1;IFT88;APC;SNAI2;PPARD
nucleotide biosynthetic process (GO:0009165)	30/208	0.0545739	0.641565	-1.4098	0.62573	PRPS2;PRPS1;SLC26A2;DTYMK;PANK3;SLC35D1;NPR1;AK1;MPI;ADK;UAP1;ADM;PAPSS2;PAPSS1;PRPSAP1;PRPSAP2;PNP;ADSS;MB21D1;ACOT7;PMM1;GFPT2;NMNAT3;DCK;DHODH;IMPDH1;RP2;GNAS;UPRT;ADA
positive regulation of stress-activated protein kinase signaling cascade (GO:0070304)	19/119	0.0544099	0.641565	-1.20853	0.5364	EDN1;MAP3K1;GADD45B;GADD45A;RIPK2;GAB1;DUSP19;NOD1;HMGCR;MID1;CTGF;DUSP22;SDCBP;DAB2;TAOK3;MDFIC;MAP3K6;MAP3K4;MYD88
sterol metabolic process (GO:0016125)	19/119	0.0544099	0.641565	-1.20607	0.535309	ABCA1;IDI1;SCARB1;PRKAA1;HMGCS1;INSIG1;HMGCR;CLN8;HSD17B7;SREBF2;SQLE;EBP;CYP11A1;CAT;PMVK;FDXR;CYP1B1;DHCR7;PPARD
activation of cysteine-type endopeptidase activity (GO:0097202)	15/88	0.054381	0.641565	-1.113	0.493997	EGLN3;HIP1;CRADD;SLC11A2;EIF2AK3;NOD1;ROBO1;ACER2;BCL2L13;BCL2L11;CASP8;PERP;CASP1;TBC1D10A;NKX3-1
positive regulation of transmembrane receptor protein serine/threonine kinase signaling pathway (GO:0090100)	13/73	0.0547203	0.641565	-0.992544	0.440535	CDKN1C;NOTCH2;CDKN2B;BMPR2;MSX2;PARP1;THBS1;CYR61;BMP5;TGFBR3;DAB2;TWSG1;HES1
hormone biosynthetic process (GO:0042446)	1944-09-01	0.0545855	0.641565	-0.780189	0.346282	SCARB1;STARD5;SCP2;CYP11A1;SRD5A3;DIO3;AKR1B1;ADM;HSD17B7
negative regulation of leukocyte migration (GO:0002686)	2016-06-24	0.0552127	0.641565	0.0513754	-0.0228027	PTGER4;RABGEF1;C5AR2;HMOX1;ADA;BMP5
response to vitamin E (GO:0033197)	2016-04-12	0.0551231	0.641565	2.74325	-1.21757	HMGCS1;CYP11A1;CAT;ADA
myelin maintenance (GO:0043217)	2016-04-12	0.0551231	0.641565	3.01093	-1.33638	CXCR4;MPP5;CLU;NDRG1
regulation of cholesterol biosynthetic process (GO:0045540)	2016-04-12	0.0551231	0.641565	3.28827	-1.45948	SEC14L2;POR;PRKAA1;DHCR7
nonmotile primary cilium assembly (GO:0035058)	2016-04-12	0.0551231	0.641565	3.3075	-1.46801	BBS2;BBS10;ARL13B;BBS7
regulation of acetyl-CoA biosynthetic process from pyruvate (GO:0010510)	2016-04-12	0.0551231	0.641565	3.47527	-1.54248	PDP2;PDPR;PDK4;PDHB
nucleoside monophosphate catabolic process (GO:0009125)	45/335	0.0559147	0.646425	-1.39183	0.607252	ABCD4;PIF1;BLM;ABCD3;DDX27;ABCB7;YTHDC2;EIF4A3;DDX12P;ABCB8;IDE;ABCB9;RAD54B;SPAST;KIF3A;KATNA1;TOP1MT;NT5M;KIF21A;LONRF3;KIF3C;MYH10;ATF7IP;ABCA1;TOR3A;DYNC1H1;TOR1A;HSPA5;MYO10;ABCA5;ABCC5;HSPA6;STARD9;DDX10;CHD1L;GTF2H2;TOR1B;SMARCA2;MYO1E;CENPE;MYL6;RAD51D;MSH2;MYH9;KIF2C
negative regulation of mitotic cell cycle phase transition (GO:1901991)	28/192	0.0557976	0.646425	-1.31837	0.575202	BLM;CDKN1A;UBE2D1;CDC73;AURKB;PSMD8;NBN;E2F7;SOX4;USP47;PLK3;CDKN2B;TIPIN;CRADD;PLK2;HUS1;RPA2;TERF1;ZWINT;APC;TAOK3;MSH2;CHMP4C;ANAPC4;NABP1;ANAPC5;MAD1L1;RAD9A
response to inorganic substance (GO:0010035)	49/370	0.0571515	0.647575	-1.44538	0.628046	CLIC4;OGG1;MT1X;ETS1;ICAM1;LOXL2;MT2A;CASP8;CYP1B1;GPX1;ANXA1;HMGCS1;SLC30A5;SLC11A2;KRT8;FOS;HBA1;STIM1;CAT;TXNIP;MT1E;PTGES;BLM;DTYMK;PRKAA1;PTGS2;NDRG1;CRIP1;THBS1;FOXO1;CST3;CYP11A1;UCP2;HMOX1;PPARGC1A;JUN;HOMER1;BNIP3;ATP2B4;GGH;KLF2;NET1;FOSL1;QDPR;NR4A2;SELM;FOSB;CALM1;ADA
nucleoside phosphate biosynthetic process (GO:1901293)	30/209	0.0570778	0.647575	-1.36779	0.594335	PRPS2;PRPS1;SLC26A2;DTYMK;PANK3;SLC35D1;NPR1;MPI;AK1;ADK;UAP1;ADM;PAPSS2;PAPSS1;PRPSAP1;PRPSAP2;PNP;ADSS;MB21D1;ACOT7;PMM1;GFPT2;NMNAT3;DCK;DHODH;IMPDH1;RP2;GNAS;UPRT;ADA
ATP catabolic process (GO:0006200)	44/327	0.0570239	0.647575	-1.36092	0.591347	ABCD4;PIF1;BLM;ABCD3;DDX27;ABCB7;YTHDC2;EIF4A3;DDX12P;ABCB8;IDE;ABCB9;RAD54B;SPAST;KIF3A;KATNA1;TOP1MT;KIF21A;LONRF3;KIF3C;MYH10;ATF7IP;ABCA1;TOR3A;DYNC1H1;TOR1A;HSPA5;ABCA5;MYO10;ABCC5;HSPA6;STARD9;DDX10;CHD1L;GTF2H2;TOR1B;SMARCA2;CENPE;MYO1E;MYL6;RAD51D;MSH2;MYH9;KIF2C
cytoskeleton-dependent intracellular transport (GO:0030705)	17/104	0.0566223	0.647575	-1.152	0.500567	SNAPIN;MYO10;IFT140;CEP152;NDE1;WDR19;AP3B1;AP3B2;PRKCZ;RPGR;BLOC1S6;KIF3A;TTC21B;TTC30A;KIF3C;HAP1;KIFAP3
negative regulation of cell division (GO:0051782)	1966-12-01	0.0566015	0.647575	-0.905445	0.393435	BLM;APC;MSH2;CHMP4C;TXNIP;UBE2D1;ANAPC4;ANAPC5;TERF1;MAD1L1;AURKB;E2F7
cellular response to toxic substance (GO:0097237)	2016-05-18	0.0569695	0.647575	0.892012	-0.387598	ABTB2;HSPA5;CYP11A1;PLA2G4A;CRIP1
programmed necrotic cell death (GO:0097300)	2016-05-18	0.0569695	0.647575	0.999736	-0.434406	MLKL;CASP1;PYGL;DNM1L;BIRC3
positive regulation of lipid storage (GO:0010884)	2016-05-18	0.0569695	0.647575	1.043	-0.453205	SCARB1;LPL;FITM2;SREBF2;PLIN5
regulation of cell projection assembly (GO:0060491)	19/120	0.0577608	0.65277	-1.21837	0.519672	USP6NL;BCAS3;MYO10;IFT140;TBC1D2B;ARAP1;ARHGAP24;ICAM1;IFT88;BIN3;KLF5;APC;TBC1D7;CDC42EP2;EPS8L1;HAP1;TBC1D15;TBC1D10A;EPHA2
maintenance of location (GO:0051235)	23/152	0.0578966	0.65277	-1.21142	0.516706	TBCCD1;HSPA5;DGAT1;HEXB;TONSL;CASC5;GCC2;SYNE2;AURKB;LATS1;GM2A;ARL2BP;OS9;TAF8;CRY1;PLIN2;FLNB;FOPNL;NFKBIE;TAF3;PLIN5;CLASP2;FBN1
glycogen metabolic process (GO:0005977)	1959-11-01	0.0582628	0.653094	-0.802596	0.341934	TCF7L2;PPP1R3C;PPP1R3E;PGM2;PHKA1;PYGL;NR1D1;CALM1;GYG1;PHKA2;PGM2L1
tetrapyrrole metabolic process (GO:0033013)	1959-11-01	0.0582628	0.653094	-0.746819	0.318171	ALAD;ABCD4;ALAS1;MMAA;SLC11A2;HMOX1;BLVRB;MTR;PPOX;HMOX2;CD320
lysosome organization (GO:0007040)	2016-07-31	0.0587856	0.653094	-0.227286	0.0968318	ABCA1;FAM160A2;AKTIP;HEXB;PPT1;CLN8;LYST
lytic vacuole organization (GO:0080171)	2016-07-31	0.0587856	0.653094	-0.21002	0.089476	ABCA1;FAM160A2;HEXB;AKTIP;PPT1;CLN8;LYST
inactivation of MAPK activity (GO:0000188)	2016-07-31	0.0587856	0.653094	-0.207183	0.0882674	DUSP22;DUSP4;RGS3;DUSP3;DUSP10;DUSP19;DUSP6
nucleotide-sugar metabolic process (GO:0009225)	2016-07-31	0.0587856	0.653094	-0.18477	0.0787187	GALT;PMM1;SLC35D1;GFPT2;MPI;UAP1;UGGT2
regulation of apoptotic signaling pathway (GO:2001233)	47/356	0.0636815	0.660135	-1.40911	0.585217	STEAP3;TMEM161A;SERPINE1;MPV17L;IFI6;HSPB1;PSEN1;THBS1;CLU;SH3RF1;ICAM1;DEDD2;SLC9A3R1;CASP8;DEPTOR;BCL2L11;YWHAQ;PEA15;LMNA;HMOX1;ITGAV;TAF9B;DNM1L;CTSC;NKX3-1;SH3GLB1;TCF7L2;WWOX;GPX1;TNFRSF12A;CRADD;WFS1;BIK;BNIP3;MKL1;SIAH1;BMP5;ZC3HC1;AR;DAB2;GCLC;CTH;SNAI1;SNAI2;ITGA6;CD44;RAD9A
growth (GO:0040007)	44/329	0.0611784	0.660135	-1.35589	0.563117	CDKN1C;NOTCH2;MESP1;NRP2;RARG;CLIC4;WDR48;XPA;ADM;FOXO3;PRKCZ;NUBP1;SLC9A1;LRP6;ROBO1;ENOX2;CCNB2;HHEX;ITGAV;NBN;SLC25A25;HOXA5;WDTC1;TCF7L2;STIL;EDN1;GPX1;IGFBP5;CADM1;MSX2;NCOA3;ARID5B;EMP1;KLF2;BMP5;TGFBR3;AR;BIN3;TEC;LHX2;SELM;TBCE;GNAS;DHCR7
intracellular receptor signaling pathway (GO:0030522)	27/186	0.0619099	0.660135	-1.2268	0.509504	NOTCH2;RARG;NOD1;AHR;PANX1;CASP8;MED30;IRAK2;CASP1;PPARGC1A;NKX3-1;VDR;RIPK2;NCOA3;NCOA4;NR1D1;ESR2;PIAS1;NR4A2;NR4A1;AR;MED24;NR4A3;CRY1;TXNIP;TAB1;PPARD
regulation of protein stability (GO:0031647)	21/138	0.0648063	0.660135	-1.1511	0.478065	STX12;PEX19;WFS1;STXBP1;SIAH1;CREBL2;ATP1B2;IFI30;CLU;CDC73;RASSF1;PPAP2B;ID1;PIM2;TAF9B;BTRC;PPARGC1A;TRIM21;SOX4;DSC3;ISOC2
tRNA metabolic process (GO:0006399)	22/146	0.0645524	0.660135	-1.14508	0.475564	PUS3;AARS2;TP53RK;TARSL2;URM1;ELAC2;RPP40;TYW1B;CDKAL1;TRMT2B;PUS7;YARS2;ALKBH8;THG1L;QTRT1;LARS2;NARS2;RPP21;TYW1;TRMT11;RPP25;EEF1E1
protein acylation (GO:0043543)	23/154	0.0641859	0.660135	-1.14092	0.473836	CCDC101;TAF12;NCOA3;DSCC1;YEATS4;ELP3;ESCO2;BRCA2;ZDHHC17;FOXO1;SUPT3H;POLE4;PER1;PPM1B;POR;MED24;ING3;KAT6B;EHHADH;SELK;NMT2;TADA1;ASL
organelle localization (GO:0051640)	20/129	0.0614056	0.660135	-1.10819	0.460243	BBS2;TCF7L2;CEP152;NDE1;VPS33A;CEP120;TPGS1;PRKCZ;SYNE2;NUBP1;BLOC1S6;HHEX;KIF3A;PLXNA2;MFN2;HAP1;BBS7;KIFAP3;MYH10;PLIN5
double-strand break repair (GO:0006302)	18/114	0.0646609	0.660135	-1.04793	0.435217	BLM;XRCC6BP1;WDR48;PARP1;ACTR5;TONSL;HUS1;RPA2;ESCO2;BRCA2;RAD54B;SETX;RAD51D;ZFYVE26;SLX4;MSH2;NABP1;NBN
protein acetylation (GO:0006473)	19/122	0.0648882	0.660135	-1.04465	0.433852	CCDC101;TAF12;NCOA3;DSCC1;YEATS4;ELP3;ESCO2;BRCA2;FOXO1;SUPT3H;POLE4;PER1;POR;MED24;ING3;KAT6B;EHHADH;TADA1;ASL
regulation of osteoblast differentiation (GO:0045667)	17/106	0.0642082	0.660135	-1.04161	0.432593	IFITM1;CEBPB;BMPR2;JAG1;IGFBP5;MSX2;CYR61;TWSG1;APC;SMOC1;ID1;GNAS;SNAI2;ID3;PDLIM7;CCRN4L;CD276
tRNA processing (GO:0008033)	16/98	0.0634859	0.660135	-0.958519	0.398083	PUS3;TP53RK;URM1;ELAC2;RPP40;TYW1B;CDKAL1;TRMT2B;PUS7;THG1L;ALKBH8;QTRT1;TYW1;RPP21;TRMT11;RPP25
water-soluble vitamin metabolic process (GO:0006767)	15/90	0.0624396	0.660135	-0.940199	0.390474	ABCD4;MCCC2;SLC46A1;MMAA;TPK1;SHMT1;MCCC1;SLC2A3;NMNAT3;MTR;GPHN;GCLC;PCCA;SLC19A2;CD320
protein stabilization (GO:0050821)	15/91	0.0667564	0.660135	-0.924817	0.384086	STX12;PEX19;WFS1;STXBP1;CREBL2;ATP1B2;IFI30;CLU;RASSF1;PPAP2B;PIM2;TAF9B;PPARGC1A;SOX4;DSC3
positive regulation of ossification (GO:0045778)	14/83	0.0654605	0.660135	-0.91045	0.378119	OSR2;IFITM1;CEBPB;BMPR2;JAG1;MSX2;MIA3;ADRB2;CYR61;LRP6;ASXL2;GNAS;PDLIM7;CD276
cellular iron ion homeostasis (GO:0006879)	1967-12-01	0.0613362	0.660135	-0.902491	0.374814	STEAP3;SLC46A1;ABCB7;MFI2;SLC11A2;ATP6V1B2;HMOX1;TCIRG1;MCOLN1;HMOX2;NUBP1;MON1A
endoplasmic reticulum unfolded protein response (GO:0030968)	14/83	0.0654605	0.660135	-0.894574	0.371526	TSPYL2;PTPN1;HSPA5;FKBP14;WFS1;EIF2AK3;PARP16;ERO1L;DNAJC3;DDIT3;CTH;LMNA;ATF6;ATF3
protein secretion (GO:0009306)	1967-12-01	0.0613362	0.660135	-0.864334	0.358967	ABCA1;NOTCH2;ARL4D;BLOC1S6;STEAP3;PNP;GNAS;PCSK5;LYST;MON1A;LMF1;PDIA4
pigment metabolic process (GO:0042440)	1960-11-01	0.0634043	0.660135	-0.752371	0.312468	ALAD;PRPS1;ALAS1;SHMT1;SLC11A2;BLVRB;HMOX1;PPOX;PPARGC1A;ADA;HMOX2
regulation of steroid biosynthetic process (GO:0050810)	1953-10-01	0.0651691	0.660135	-0.748761	0.310968	SEC14L2;PRKAA1;POR;VDR;INSIG1;SNAI1;SNAI2;DHCR7;NR1D1;BMP5
positive regulation of proteasomal ubiquitin-dependent protein catabolic process (GO:0032436)	1952-10-01	0.0595708	0.660135	-0.742165	0.308229	PLK3;DAB2;GCLC;ESPL1;PLK2;PSEN1;BBS7;TRIB1;CLU;PIAS1
cellular glucan metabolic process (GO:0006073)	1960-11-01	0.0634043	0.660135	-0.735779	0.305577	TCF7L2;PPP1R3C;PPP1R3E;PGM2;PHKA1;NR1D1;PYGL;CALM1;GYG1;PHKA2;PGM2L1
glucan metabolic process (GO:0044042)	1960-11-01	0.0634043	0.660135	-0.732311	0.304136	TCF7L2;PPP1R3C;PPP1R3E;PGM2;PHKA1;NR1D1;PYGL;CALM1;GYG1;PHKA2;PGM2L1
positive regulation of oxidoreductase activity (GO:0051353)	1938-08-01	0.0602257	0.660135	-0.6155	0.255623	SCARB1;POR;EDN1;EDN2;GCH1;VDR;ABL2;CALM1
sulfur amino acid metabolic process (GO:0000096)	1945-09-01	0.0603267	0.660135	-0.600329	0.249323	GCLC;GOT1;ADI1;CTH;ETHE1;MTR;SQRDL;SUOX;PCYOX1
cellular respiration (GO:0045333)	1938-08-01	0.0602257	0.660135	-0.504075	0.209347	FASTKD1;CAT;NDUFS4;MTFR1;MTFR2;PPARGC1A;SLC25A14;SLC25A25
regulation of cilium assembly (GO:1902017)	1938-08-01	0.0602257	0.660135	-0.503115	0.208949	USP6NL;IFT88;IFT140;TBC1D7;TBC1D2B;HAP1;TBC1D10A;TBC1D15
negative regulation of fat cell differentiation (GO:0045599)	1939-08-01	0.066921	0.660135	-0.453089	0.188173	TCF7L2;ANKRD26;JAG1;MSX2;CCDC85B;INSIG1;FOXO1;LRP6
neurogenesis (GO:0022008)	1939-08-01	0.066921	0.660135	-0.401585	0.166783	MESP1;TCF7L2;ANXA1;KIF3A;CEP120;SIX1;CLN5;CDK5RAP2
negative regulation of cytokine secretion (GO:0050710)	1932-07-01	0.0661373	0.660135	-0.24526	0.101859	PTGER4;RABGEF1;ANXA1;C5AR2;ANXA4;LGR4;TNFRSF21
fat-soluble vitamin metabolic process (GO:0006775)	1932-07-01	0.0661373	0.660135	-0.0894033	0.0371301	VKORC1;CBR1;CYP11A1;CYP2R1;PLTP;PPARD;LGMN
mitotic DNA damage checkpoint (GO:0044773)	1932-07-01	0.0661373	0.660135	-0.0837967	0.0348016	TIPIN;BLM;MSH2;TAOK3;RPA2;NBN;RAD9A
response to testosterone (GO:0033574)	2016-06-25	0.0632913	0.660135	0.170654	-0.0708745	EDN1;GBA;HOXB13;THBS1;AACS;NKX3-1
lipid storage (GO:0019915)	2016-06-25	0.0632913	0.660135	0.179868	-0.0747011	DGAT1;GM2A;HEXB;CRY1;PLIN2;PLIN5
negative regulation of intrinsic apoptotic signaling pathway in response to DNA damage (GO:1902230)	2016-06-25	0.0632913	0.660135	0.183306	-0.076129	TMEM161A;SNAI1;SNAI2;TAF9B;CLU;CD44
negative regulation of cell-matrix adhesion (GO:0001953)	2016-06-25	0.0632913	0.660135	0.215414	-0.0894638	ACER2;BCAS3;BCL6;SERPINE1;PIK3R1;THBS1
necrotic cell death (GO:0070265)	2016-05-19	0.0666613	0.660135	1.19942	-0.498132	MLKL;CASP1;PYGL;DNM1L;BIRC3
positive regulation of heart rate (GO:0010460)	2016-05-19	0.0666613	0.660135	1.20737	-0.501432	EDN1;EDN2;CHRNA7;ADM;ADA
deoxyribonucleoside triphosphate metabolic process (GO:0009200)	2016-05-19	0.0666613	0.660135	1.33234	-0.553334	DTYMK;ADK;NUDT15;SAMHD1;ADA
blastocyst development (GO:0001824)	2016-05-19	0.0666613	0.660135	1.41724	-0.588595	TGFBR3;ELF3;MED21;CAPN2;NEK2
cellular response to antibiotic (GO:0071236)	2016-04-13	0.0669556	0.660135	3.24942	-1.34952	HSPA5;CYP11A1;PLA2G4A;CRIP1
regulation of cholesterol storage (GO:0010885)	2016-04-13	0.0669556	0.660135	3.31832	-1.37813	ABCA1;SCARB1;LPL;SREBF2
necroptotic process (GO:0070266)	2016-04-13	0.0669556	0.660135	3.35759	-1.39444	MLKL;PYGL;DNM1L;BIRC3
positive regulation of insulin-like growth factor receptor signaling pathway (GO:0043568)	2016-04-13	0.0669556	0.660135	3.41539	-1.41844	IFT88;IGFBP5;IGFBP3;KIAA1161
cellular response to cholesterol (GO:0071397)	2016-04-13	0.0669556	0.660135	3.42665	-1.42312	ABCA1;HMGCS1;AACS;LRP6
positive regulation of gluconeogenesis (GO:0045722)	2016-04-13	0.0669556	0.660135	3.65956	-1.51985	TCF7L2;SMEK1;PPARGC1A;FOXO1
antigen processing and presentation of endogenous antigen (GO:0019883)	2016-04-13	0.0669556	0.660135	3.67725	-1.5272	ERAP1;HLA-C;HLA-A;HLA-E
peptidyl-proline hydroxylation (GO:0019511)	2016-04-13	0.0669556	0.660135	3.77484	-1.56773	EGLN3;P4HA1;P4HA3;LEPREL1
AMP metabolic process (GO:0046033)	2016-04-13	0.0669556	0.660135	3.79214	-1.57491	PRPS2;AK1;ADK;ADSS
regulation of acyl-CoA biosynthetic process (GO:0050812)	2016-04-13	0.0669556	0.660135	3.81322	-1.58367	PDP2;PDPR;PDK4;PDHB
negative regulation of glycoprotein metabolic process (GO:1903019)	2016-04-13	0.0669556	0.660135	3.82047	-1.58668	ACER2;CST3;AATF;HBEGF
sphingomyelin metabolic process (GO:0006684)	2016-04-13	0.0669556	0.660135	3.9983	-1.66053	SPTLC2;SMPD1;SGMS2;SMPDL3A
quinone biosynthetic process (GO:1901663)	2016-04-13	0.0669556	0.660135	4.02644	-1.67222	COQ3;PDSS2;ADCK3;COQ5
carboxylic acid biosynthetic process (GO:0046394)	37/272	0.0677098	0.66288	-1.20874	0.496985	LIPT2;PRKAA1;OAT;ACSS2;SLC35D1;ASNSD1;SHMT1;TECR;SLC1A3;LPL;MTR;PTGS2;GLS;FADS3;SCP2;ASL;LTA4H;SEPHS2;PRKAB2;EDN1;ACOT7;EDN2;GOT1;GCH1;ELOVL4;PNPLA8;SCD5;PLA2G4A;ELOVL7;ALDH1A3;GCLC;AMACR;ADI1;CTH;CSPG4;ALDH7A1;PTGES
organic acid biosynthetic process (GO:0016053)	37/272	0.0677098	0.66288	-1.20616	0.495925	LIPT2;PRKAA1;OAT;ACSS2;SLC35D1;ASNSD1;SHMT1;TECR;SLC1A3;LPL;MTR;PTGS2;GLS;FADS3;SCP2;ASL;LTA4H;SEPHS2;PRKAB2;EDN1;ACOT7;EDN2;GOT1;GCH1;ELOVL4;PNPLA8;SCD5;PLA2G4A;ELOVL7;ALDH1A3;GCLC;AMACR;ADI1;CTH;CSPG4;ALDH7A1;PTGES
purine ribonucleoside monophosphate catabolic process (GO:0009169)	44/332	0.0678161	0.66288	-1.19941	0.493152	ABCD4;PIF1;BLM;ABCD3;DDX27;ABCB7;YTHDC2;DDX12P;EIF4A3;ABCB8;IDE;ABCB9;RAD54B;SPAST;KIF3A;KATNA1;TOP1MT;KIF21A;LONRF3;KIF3C;MYH10;ATF7IP;ABCA1;TOR3A;DYNC1H1;TOR1A;HSPA5;ABCA5;MYO10;ABCC5;HSPA6;STARD9;DDX10;CHD1L;GTF2H2;TOR1B;SMARCA2;MYO1E;CENPE;MYL6;RAD51D;MSH2;MYH9;KIF2C
ribonucleoside monophosphate catabolic process (GO:0009158)	44/332	0.0678161	0.66288	-1.19694	0.492136	ABCD4;PIF1;BLM;ABCD3;DDX27;ABCB7;YTHDC2;DDX12P;EIF4A3;ABCB8;IDE;ABCB9;RAD54B;SPAST;KIF3A;KATNA1;TOP1MT;KIF21A;LONRF3;KIF3C;MYH10;ATF7IP;ABCA1;TOR3A;DYNC1H1;TOR1A;HSPA5;MYO10;ABCA5;ABCC5;HSPA6;STARD9;DDX10;CHD1L;GTF2H2;TOR1B;SMARCA2;MYO1E;CENPE;MYL6;RAD51D;MSH2;MYH9;KIF2C
positive regulation of JNK cascade (GO:0046330)	17/107	0.0682489	0.665682	-0.94619	0.385045	EDN1;MAP3K1;GADD45B;GADD45A;RIPK2;GAB1;DUSP19;NOD1;CTGF;DUSP22;SDCBP;DAB2;MDFIC;TAOK3;MAP3K6;MYD88;MAP3K4
protein homooligomerization (GO:0051260)	32/230	0.0685443	0.667135	-1.12192	0.454109	TOR2A;SHMT1;ATL2;IDE;SAMHD1;GLS;ACAT1;THG1L;ALAD;SPAST;HMOX1;DNM1L;ACADS;DECR1;VASP;TOR1A;GCH1;MLKL;DCXR;AKR1C1;EIF2AK3;KCTD1;TERF1;TOR1B;EHD4;P2RX4;CTH;CLPP;CAT;ALDOC;ANGPTL4;MICU1
apoptotic mitochondrial changes (GO:0008637)	1961-11-01	0.0688327	0.668514	-0.696296	0.280397	JUN;GCLC;MAP3K1;BCL2L11;BIK;BNIP3;IFI6;THEM4;PIM2;DNM1L;CLU
purine ribonucleoside monophosphate metabolic process (GO:0009167)	52/402	0.0691856	0.670512	-1.22724	0.490545	ABCD4;ABCD3;EIF4A3;DDX12P;ADK;IDE;TOP1MT;KIF21A;TOR3A;ABCC5;STARD9;DDX10;CHD1L;MYL6;RAD51D;MSH2;ATP6V1B2;MYH9;KIF2C;PRPS2;PIF1;BLM;DDX27;ABCB7;YTHDC2;AK1;ABCB8;ABCB9;RAD54B;SPAST;KIF3A;KATNA1;LONRF3;KIF3C;MYH10;ADSS;SLC25A25;ATF7IP;ABCA1;DYNC1H1;TOR1A;HSPA5;ABCA5;MYO10;HSPA6;GTF2H2;TOR1B;SMARCA2;MYO1E;CENPE;IMPDH1;ADA
purine nucleoside monophosphate catabolic process (GO:0009128)	44/333	0.0701392	0.678311	-1.18967	0.46177	ABCD4;PIF1;BLM;ABCD3;DDX27;ABCB7;YTHDC2;EIF4A3;DDX12P;ABCB8;IDE;ABCB9;RAD54B;SPAST;KIF3A;KATNA1;TOP1MT;KIF21A;LONRF3;KIF3C;MYH10;ATF7IP;ABCA1;TOR3A;DYNC1H1;TOR1A;HSPA5;ABCA5;MYO10;ABCC5;HSPA6;STARD9;DDX10;CHD1L;GTF2H2;TOR1B;SMARCA2;MYO1E;CENPE;MYL6;RAD51D;MSH2;MYH9;KIF2C
purine nucleoside monophosphate metabolic process (GO:0009126)	52/403	0.0713258	0.688324	-1.22598	0.457899	ABCD4;ABCD3;EIF4A3;DDX12P;ADK;IDE;TOP1MT;KIF21A;TOR3A;ABCC5;STARD9;DDX10;CHD1L;MYL6;RAD51D;MSH2;ATP6V1B2;MYH9;KIF2C;PRPS2;PIF1;BLM;DDX27;ABCB7;YTHDC2;AK1;ABCB8;ABCB9;RAD54B;SPAST;KIF3A;KATNA1;LONRF3;KIF3C;MYH10;ADSS;SLC25A25;ATF7IP;ABCA1;DYNC1H1;TOR1A;HSPA5;ABCA5;MYO10;HSPA6;GTF2H2;TOR1B;SMARCA2;MYO1E;CENPE;IMPDH1;ADA
alpha-amino acid biosynthetic process (GO:1901607)	1969-12-01	0.0715734	0.689254	-0.663819	0.247038	OAT;GCH1;GOT1;ADI1;ASNSD1;SHMT1;CTH;SLC1A3;ASL;MTR;SEPHS2;GLS
negative regulation of extrinsic apoptotic signaling pathway via death domain receptors (GO:1902042)	2016-06-26	0.0720277	0.689257	0.425862	-0.158481	GPX1;SERPINE1;PEA15;HMOX1;ICAM1;BMP5
regulation of triglyceride metabolic process (GO:0090207)	2016-06-26	0.0720277	0.689257	0.453346	-0.168709	SCARB1;TCF7L2;FITM2;ABHD5;LMF1;PLIN5
negative regulation of response to biotic stimulus (GO:0002832)	2016-06-26	0.0720277	0.689257	0.562788	-0.209437	SIGIRR;PPM1B;TRIM38;PRDM1;TRIB1;MICB
cellular response to abiotic stimulus (GO:0071214)	32/232	0.0742809	0.690942	-1.16406	0.430353	PTGER4;CDKN1A;BLM;TMEM161A;PIK3R1;PTPRK;PTGS2;CRIP1;AURKB;SLC9A1;CASP8;MYO6;CASP1;TMEM109;SLC12A6;ADSS;USP47;MAP3K1;CRADD;GADD45A;RHBDD1;BNIP3;ACTR5;HUS1;NET1;IRF1;CRY1;NMT2;SNAI2;CALM1;MYD88;RAD9A
positive regulation of innate immune response (GO:0045089)	27/190	0.0741827	0.690942	-1.10651	0.409075	UBE2D1;NOD1;RPS6KA5;CASP8;IRAK2;CTSL;TRIM5;IKBKE;CTSB;MB21D1;MAP2K3;DUSP4;JUN;MAP3K1;DUSP3;CADM1;RIPK2;PPP2R5D;FOS;DUSP6;HLA-E;TNIP1;PELI1;TAB1;MYD88;LGMN;BIRC3
cellular response to oxygen levels (GO:0071453)	17/109	0.0768356	0.690942	-0.900774	0.333015	EGLN3;PRKAA1;EPAS1;BNIP3;SLC11A2;UBE2D1;PTGS2;NDRG1;FOXO1;VASN;ICAM1;LMNA;HMOX1;PPARGC1A;CPEB4;PPARD;NKX3-1
cellular response to decreased oxygen levels (GO:0036294)	16/101	0.0765606	0.690942	-0.84661	0.312991	EGLN3;PRKAA1;EPAS1;BNIP3;SLC11A2;UBE2D1;PTGS2;NDRG1;VASN;ICAM1;LMNA;HMOX1;PPARGC1A;CPEB4;PPARD;NKX3-1
positive regulation of angiogenesis (GO:0045766)	16/101	0.0765606	0.690942	-0.818595	0.302634	BTG1;CHRNA7;ERAP1;SERPINE1;VASH2;HSPB1;ADM;PTGS2;THBS1;ETS1;PGF;RUNX1;PDCL3;HMOX1;CYP1B1;ANGPTL4
regulation of response to cytokine stimulus (GO:0060759)	16/101	0.0765606	0.690942	-0.808818	0.299019	IFNAR2;PTPN1;EDN1;RIPK2;STAT2;TYK2;VRK2;USP18;ROBO1;PIAS1;SIGIRR;RABGEF1;SOCS1;IRAK2;PTPN6;ZNF675
protein localization to nucleus (GO:0034504)	16/101	0.0765606	0.690942	-0.795564	0.294119	IPO13;RERE;OSBPL8;TCF7L2;JUN;TOR1A;EGF;RANBP17;SIX1;CBLB;PIK3R1;SYNE2;HHEX;LMNA;TXNIP;HES1
maintenance of protein location in cell (GO:0032507)	15/93	0.0759771	0.690942	-0.766339	0.283315	HSPA5;TONSL;CASC5;GCC2;AURKB;SYNE2;LATS1;ARL2BP;OS9;TAF8;FLNB;FOPNL;NFKBIE;TAF3;CLASP2
leukocyte mediated immunity (GO:0002443)	1970-12-01	0.0770814	0.690942	-0.565146	0.208934	JAG1;CADM1;MSH2;RAET1G;PTPN6;TUBB4B;LYST;ULBP1;MICA;MYD88;CTSC;ULBP3
cellular response to hydrogen peroxide (GO:0070301)	1962-11-01	0.0745508	0.690942	-0.556414	0.205706	CST3;NET1;PRKAA1;ANXA1;GPX1;BNIP3;CAT;CYP1B1;HBA1;ETS1;KLF2
negative regulation of G-protein coupled receptor protein signaling pathway (GO:0045744)	1962-11-01	0.0745508	0.690942	-0.51926	0.19197	RGS2;RGS3;RGS16;ATP2B4;RGS10;CRY1;SNX13;MYH9;RGS20;ADRB2;ADA
telomere maintenance (GO:0000723)	1962-11-01	0.0745508	0.690942	-0.474949	0.175588	PRIM2;PIF1;RAD51D;BLM;PARP1;POLE2;FBXO4;OBFC1;RPA2;NBN;TERF1
cellular response to UV (GO:0034644)	1947-09-01	0.0729287	0.690942	-0.447455	0.165424	USP47;TMEM161A;RHBDD1;ACTR5;PIK3R1;PTPRK;PTGS2;CRIP1;AURKB
cellular response to hexose stimulus (GO:0071331)	1940-08-01	0.0740567	0.690942	-0.311449	0.115142	TJP1;MLXIPL;UCP2;AACS;SOX4;SLC26A6;PCK2;ICAM1
negative regulation of viral genome replication (GO:0045071)	1940-08-01	0.0740567	0.690942	-0.256855	0.0949589	APOBEC3C;SRPK2;ISG20;IFITM1;SLPI;TNIP1;ZC3HAV1;OASL
platelet aggregation (GO:0070527)	1940-08-01	0.0740567	0.690942	-0.2344	0.0866576	RAP2B;STXBP3;STXBP1;GNAS;MYH9;HSPB1;PTPN6;VCL
spindle assembly checkpoint (GO:0071173)	1933-07-01	0.0740178	0.690942	0.0579591	-0.0214274	APC;UBE2D1;CASC5;ANAPC4;ANAPC5;TERF1;MAD1L1
response to cholesterol (GO:0070723)	2016-05-20	0.0772096	0.690942	1.44071	-0.53263	ABCA1;HMGCS1;PMVK;AACS;LRP6
ventricular septum morphogenesis (GO:0060412)	2016-05-20	0.0772096	0.690942	1.54274	-0.570348	HES1;PITX2;TBX3;SOX4;SAV1
T cell mediated immunity (GO:0002456)	2016-05-20	0.0772096	0.690942	1.61079	-0.595509	JAG1;CADM1;LYST;CTSC;MICA
regulation of cholesterol metabolic process (GO:0090181)	2016-05-20	0.0772096	0.690942	1.71292	-0.633267	SEC14L2;POR;PRKAA1;DHCR7;LMF1
artery smooth muscle contraction (GO:0014824)	2016-03-08	0.0755578	0.690942	8.41967	-3.11274	BBS2;EDN1;EDN2
cellular response to follicle-stimulating hormone stimulus (GO:0071372)	2016-03-08	0.0755578	0.690942	8.5877	-3.17486	POR;HMGCS1;CYP11A1
energy homeostasis (GO:0097009)	2016-03-08	0.0755578	0.690942	9.32089	-3.44592	EDN2;PRCP;OMA1
galactose catabolic process (GO:0019388)	2016-03-08	0.0755578	0.690942	9.57196	-3.53874	GALT;PGM2;PGM2L1
iron ion import (GO:0097286)	2016-03-08	0.0755578	0.690942	9.5758	-3.54016	STEAP3;MFI2;SLC11A2
fatty acid elongation (GO:0030497)	2016-03-08	0.0755578	0.690942	9.69689	-3.58493	ELOVL4;TECR;ELOVL7
positive regulation of p38MAPK cascade (GO:1900745)	2016-03-08	0.0755578	0.690942	9.89142	-3.65685	GADD45B;GADD45A;MAP3K4
intra-S DNA damage checkpoint (GO:0031573)	2016-03-08	0.0755578	0.690942	9.98158	-3.69018	TIPIN;MSH2;RAD9A
response to xenobiotic stimulus (GO:0009410)	2016-03-08	0.0755578	0.690942	10.2178	-3.77751	GCLC;GPX1;AHR
negative regulation of amyloid precursor protein catabolic process (GO:1902992)	2016-03-08	0.0755578	0.690942	10.3257	-3.81739	OLFM1;HAP1;CLU
response to misfolded protein (GO:0051788)	2016-03-08	0.0755578	0.690942	10.3402	-3.82275	ATXN3;TOR1A;CLU
hormone catabolic process (GO:0042447)	2016-03-08	0.0755578	0.690942	11.7216	-4.33345	DIO3;IDE;HSD17B11
epithelial cell differentiation (GO:0030855)	40/303	0.0817099	0.694382	-1.04769	0.382125	GPSM2;MESP1;CLIC4;CEBPB;BMPR2;DLX3;SIX1;F11R;SAV1;BLOC1S6;HHEX;PTER;MCIDAS;CYP11A1;CASP6;ZNF703;MYO6;PITX2;E2F7;HOXA5;SOX4;CTSB;FZD1;CBR1;GSTK1;JUN;JAG1;ANXA1;ANXA4;AKR1C1;KLF2;LATS1;DAB2;ELF3;NUMB;ID3;TXNIP;ALDOC;CCNO;EPHA2
negative regulation of cell cycle phase transition (GO:1901988)	28/200	0.0795997	0.694382	-1.01319	0.369545	BLM;CDKN1A;UBE2D1;CDC73;AURKB;PSMD8;NBN;SOX4;E2F7;USP47;PLK3;CDKN2B;TIPIN;CRADD;PLK2;HUS1;RPA2;TERF1;ZWINT;APC;TAOK3;MSH2;CHMP4C;NABP1;ANAPC4;ANAPC5;MAD1L1;RAD9A
hematopoietic or lymphoid organ development (GO:0048534)	25/175	0.0798075	0.694382	-0.959315	0.349894	L3MBTL1;NOTCH2;FUT10;RTKN2;SIX1;PSEN1;BRCA2;CCNB2;EBP;BCL2L11;HES1;JARID2;PITX2;CDKN2B;JAG1;LMO4;ZNF160;RUNX1;TGFBR3;MYO1E;KITLG;TWSG1;MAFB;APC;ADA
positive regulation of NF-kappaB transcription factor activity (GO:0051092)	19/126	0.0808977	0.694382	-0.819801	0.299009	RIPK2;NOD1;CLU;PRKCZ;ICAM1;TGFBR3;AR;RPS6KA5;IRAK2;TRIM5;CTH;CAT;TRIM14;TRIM15;TRIM38;ERC1;TAB1;RHEBL1;MYD88
negative regulation of epithelial cell proliferation (GO:0050680)	17/110	0.0813848	0.694382	-0.819295	0.298824	CDKN1C;CDKN2B;VDR;PTPRK;BRCA2;THBS1;CDC73;ESR2;SAV1;LRP6;ROBO1;TGFBR3;IFT88;APC;SNAI2;NKX3-1;PPARD
zymogen activation (GO:0031638)	16/102	0.0812846	0.694382	-0.761007	0.277564	EGLN3;HIP1;CRADD;SLC11A2;EIF2AK3;NOD1;PLAT;ROBO1;ACER2;BCL2L13;BCL2L11;CASP8;PERP;CASP1;TBC1D10A;NKX3-1
regulation of cytokinesis (GO:0032465)	1948-09-01	0.0797953	0.694382	-0.364785	0.133049	PLK3;KLHL21;CHMP4C;CCP110;CALM1;BRCA2;AURKB;E2F7;CDC25B
telomere organization (GO:0032200)	1963-11-01	0.0805609	0.694382	-0.359086	0.130971	PRIM2;PIF1;BLM;RAD51D;PARP1;POLE2;FBXO4;OBFC1;RPA2;NBN;TERF1
phospholipid transport (GO:0015914)	1948-09-01	0.0797953	0.694382	-0.336001	0.122551	ABCA1;PRELID2;SCARB1;SLMO1;ATP8B3;SCP2;ATP10D;ATP9B;MFSD2A
regulation of chondrocyte differentiation (GO:0032330)	1941-08-01	0.0816339	0.694382	-0.184192	0.0671809	RARG;POR;SCIN;SNAI2;KIAA1715;GLG1;LOXL2;CTGF
cellular response to monosaccharide stimulus (GO:0071326)	1941-08-01	0.0816339	0.694382	-0.118287	0.0431434	TJP1;MLXIPL;UCP2;AACS;SOX4;SLC26A6;PCK2;ICAM1
triglyceride biosynthetic process (GO:0019432)	1941-08-01	0.0816339	0.694382	-0.045863	0.0167278	DGAT1;GK;ELOVL4;TECR;PNPLA3;LPL;ELOVL7;AGPAT4
spindle checkpoint (GO:0031577)	1941-08-01	0.0816339	0.694382	-0.0249183	0.00908855	APC;UBE2D1;ANAPC4;CASC5;ANAPC5;TERF1;MAD1L1;AURKB
oligosaccharide metabolic process (GO:0009311)	1941-08-01	0.0816339	0.694382	-0.0247938	0.0090431	NEU3;GM2A;MAN2A1;MAN1A2;HEXB;NEU1;NAGA;MPDU1
glutathione derivative metabolic process (GO:1901685)	2016-06-27	0.081419	0.694382	0.776586	-0.283247	GSTM4;GCLC;GSTM1;GSTA4;MGST3;GSTT1
glutathione derivative biosynthetic process (GO:1901687)	2016-06-27	0.081419	0.694382	0.781533	-0.285051	GSTM4;GCLC;GSTM1;GSTA4;MGST3;GSTT1
negative regulation of DNA-dependent DNA replication (GO:2000104)	2016-04-14	0.0799867	0.694382	3.68757	-1.34498	BLM;TIPIN;BRCA2;TERF1
regulation of fibroblast apoptotic process (GO:2000269)	2016-04-14	0.0799867	0.694382	3.68836	-1.34527	BCL2L11;BTG1;STK17A;STK17B
negative regulation of lipase activity (GO:0060192)	2016-04-14	0.0799867	0.694382	3.80347	-1.38725	POR;RGS2;ANGPTL4;PLIN5
negative regulation of T cell receptor signaling pathway (GO:0050860)	2016-04-14	0.0799867	0.694382	3.85975	-1.40778	DUSP3;CBLB;PTPN6;PHPT1
inositol phosphate-mediated signaling (GO:0048016)	2016-04-14	0.0799867	0.694382	3.88785	-1.41803	HRH1;EDN1;EDN2;ITPR2
regulation of cofactor metabolic process (GO:0051193)	2016-04-14	0.0799867	0.694382	3.93133	-1.43389	PDPR;PDP2;PDK4;PDHB
progesterone metabolic process (GO:0042448)	2016-04-14	0.0799867	0.694382	3.99376	-1.45666	SCP2;CYP11A1;AKR1C1;ADM
regulation of coenzyme metabolic process (GO:0051196)	2016-04-14	0.0799867	0.694382	4.00961	-1.46244	PDP2;PDPR;PDK4;PDHB
centriole assembly (GO:0098534)	2016-04-14	0.0799867	0.694382	4.02623	-1.4685	CEP135;MCIDAS;CEP152;CCP110
protein localization to lysosome (GO:0061462)	2016-04-14	0.0799867	0.694382	4.43795	-1.61867	ZFYVE16;SNX16;AP3B1;GCC2
protein localization to vacuole (GO:0072665)	2016-04-14	0.0799867	0.694382	4.51536	-1.6469	ZFYVE16;SNX16;AP3B1;GCC2
protein catabolic process (GO:0030163)	36/269	0.0829526	0.70363	-1.01834	0.357951	NGLY1;UBE2D1;IDE;CLN8;USE1;AURKB;UBE2J1;CLN5;PSMD8;ATXN3;FOXRED2;OS9;FBXO4;BTRC;SKP1;EDEM3;MANBA;TOR1A;HSPA5;WFS1;RHBDD1;BNIP3;SIAH1;LNPEP;NR1D1;PJA1;KLHL20;CD2AP;RNF103;APC;DDIT3;DNAJC10;PPT1;ANAPC4;ANAPC5;TRIM38
morphogenesis of an epithelium (GO:0002009)	39/296	0.0863691	0.708991	-0.976958	0.335988	NOTCH2;MESP1;RARG;CLIC4;SEMA3C;CXCR4;SIX1;ADM;PSEN1;HOXB13;LRP6;DLL4;HHEX;ARL13B;HES1;BBS7;PITX2;BTRC;HOXA5;PHACTR4;NKX3-1;STIL;TFAP2C;EDN1;JAG1;MSX2;EGF;VDR;NCOA3;MPP5;ESR2;TBX3;PGF;ALDH1A3;KRT17;LGR4;CD44;VCL;EPHA2
pattern specification process (GO:0007389)	49/385	0.0912676	0.708991	-0.956616	0.328992	MESP1;GALNT11;RARG;PGAP1;BMPR2;SIX1;PCSK5;HHEX;TMEM107;TCTN1;BBS7;PITX2;HOXA5;WLS;NKX3-1;HES7;EDN1;MSX2;MID1;DUSP6;DISP1;IFT88;ARC;NOTCH2;SEMA3C;CXCR4;TULP3;PSEN1;RNF2;LRP6;DYNC2LI1;DLL4;EFNB1;ARL13B;KIF3A;TTC21B;PLXNA2;ALX1;STIL;SMAD6;VAX2;TBX3;BMP5;MAFB;APC;LHX2;ABI1;SNAI1;HOXD9
nuclear division (GO:0000280)	39/298	0.0923349	0.708991	-0.917993	0.315709	TDRKH;ERCC6L;CEP164;NEDD9;CASC5;YEATS4;BRCA2;AURKB;CENPC;SLC2A8;CCNB2;KATNA1;NEK2;PIM2;FAM83D;SAC3D1;CEP55;CLASP2;TIPIN;NDE1;KLHL21;HAUS4;HAUS5;CDC25C;TERF1;GEM;CD2AP;CDC25B;ZC3HC1;LATS1;DYNC1LI1;MIS18A;ANAPC4;KIF2C;ANAPC5;FAM64A;MAD1L1;SPC24;SPC25
divalent inorganic cation transport (GO:0072511)	32/238	0.0934654	0.708991	-0.917516	0.315545	MCUR1;CHRNA7;ITPR2;MAGT1;PSEN1;JPH1;ERO1L;CTGF;PANX1;NIPAL1;ITGAV;CNNM2;CAMK2G;SLC25A25;VDR;SLC30A5;CACNA2D1;CACFD1;SLC11A2;ATP2B4;ZDHHC13;MCOLN1;ZDHHC17;SLC8B1;MCOLN2;TPCN2;P2RX4;STIM1;DDIT3;SELK;MICU2;MICU1
regulation of cysteine-type endopeptidase activity involved in apoptotic process (GO:0043281)	26/186	0.0895681	0.708991	-0.917196	0.315435	TNFAIP8;HIP1;IFI6;NOD1;UACA;THBS1;CYR61;SH3RF1;ROBO1;CTGF;BCL2L13;CASP8;BCL2L11;CASP1;NKX3-1;USP47;EGLN3;GPX1;CRADD;SLC11A2;MKL1;EIF2AK3;ACER2;NR4A1;POR;CD44
regulation of extrinsic apoptotic signaling pathway (GO:2001236)	23/161	0.0898925	0.708991	-0.907326	0.31204	TCF7L2;WWOX;GPX1;TNFRSF12A;SERPINE1;IFI6;THBS1;SH3RF1;BMP5;ICAM1;DEDD2;ZC3HC1;AR;DAB2;GCLC;DEPTOR;CASP8;PEA15;LMNA;SNAI2;HMOX1;ITGA6;ITGAV
cellular amide metabolic process (GO:0043603)	25/177	0.0872164	0.708991	-0.890584	0.306283	ERO1LB;ASNSD1;GSTT1;SGMS2;IDE;PSEN1;PCSK5;CLN5;SPTLC2;SMPD1;ASL;LTA4H;MCCC2;GSTM4;GSTK1;ARG2;GPX1;GSTM1;MCCC1;ASRGL1;GCLC;PCCA;GSTA4;ETHE1;SMPDL3A
DNA replication (GO:0006260)	26/186	0.0895681	0.708991	-0.881555	0.303178	BLM;RNASEH2A;DSCC1;MCM10;POLB;HELB;SLX4;TOP1MT;POLI;NT5M;POLG;GINS2;EGF;GINS3;GINS4;HUS1;RPA2;BAZ1A;TERF1;CDC25C;CCDC88A;KIAA0101;POLE2;RAD9A;ZPR1;MCM2
microtubule-based movement (GO:0007018)	26/187	0.0934136	0.708991	-0.84998	0.292319	ULK4;PRKCZ;RPGR;BLOC1S6;SNX29;KIF3A;TTC21B;KIF13B;KIF21A;KIF3C;KIFAP3;DYNC1H1;SNAPIN;IFT140;CEP152;NDE1;DNAH14;STARD9;WDR19;AP3B1;AP3B2;CENPE;DYNC1LI1;TTC30A;KIF2C;HAP1
response to tumor necrosis factor (GO:0034612)	17/111	0.0861065	0.708991	-0.815505	0.280462	EDN1;ENDOG;GCH1;YTHDC2;GBA;SLC11A2;KRT8;PTGS2;THBS1;KLF2;ICAM1;CASP8;CYP11A1;CD58;PPARGC1A;TNFRSF21;NKX3-1
positive regulation of cysteine-type endopeptidase activity (GO:2001056)	18/119	0.0857853	0.708991	-0.786894	0.270622	EGLN3;HIP1;CRADD;SLC11A2;EIF2AK3;NOD1;UACA;CYR61;ROBO1;CTGF;ACER2;BCL2L13;BCL2L11;CASP8;PERP;CASP1;TBC1D10A;NKX3-1
fatty acid biosynthetic process (GO:0006633)	17/111	0.0861065	0.708991	-0.778284	0.267661	LIPT2;EDN1;PRKAB2;PRKAA1;EDN2;ACOT7;ACSS2;ELOVL4;PNPLA8;SCD5;TECR;LPL;ELOVL7;PTGS2;FADS3;LTA4H;PTGES
transition metal ion homeostasis (GO:0055076)	18/120	0.0904916	0.708991	-0.755932	0.259974	STEAP3;SLC46A1;SLC31A2;ABCB7;SLC30A5;MFI2;SLC11A2;COMMD1;TCIRG1;MCOLN1;ATOX1;NUBP1;MT2A;ATP6V1B2;HMOX1;SFXN5;MON1A;HMOX2
positive regulation of lipid metabolic process (GO:0045834)	16/103	0.086194	0.708991	-0.742444	0.255335	VAV3;SCARB1;TCF7L2;PRKAA1;ANXA1;CREBL2;SORBS1;ABHD5;NR1D1;PTGS2;CYR61;MLXIPL;POR;SCP2;PPARGC1A;PLIN5
cellular hormone metabolic process (GO:0034754)	15/95	0.0859926	0.708991	-0.727594	0.250229	SCARB1;STARD5;DGAT1;AKR1C1;SRD5A3;AKR1B1;ADM;HSD17B7;HSD17B11;SULT1A1;ALDH1A3;SCP2;CYP11A1;CYP1B1;PPARGC1A
maintenance of location in cell (GO:0051651)	16/103	0.086194	0.708991	-0.704414	0.242257	TBCCD1;HSPA5;TONSL;CASC5;GCC2;AURKB;SYNE2;LATS1;ARL2BP;OS9;TAF8;FLNB;FOPNL;NFKBIE;TAF3;CLASP2
intrinsic apoptotic signaling pathway in response to DNA damage (GO:0008630)	13/79	0.0844245	0.708991	-0.576973	0.198428	CDKN1A;XPA;PIK3R1;BRCA2;UACA;CRIP1;POLB;BCL2L11;MSH2;TMEM109;HMOX1;IKBKE;EPHA2
positive regulation of blood circulation (GO:1903524)	1972-12-01	0.0888854	0.708991	-0.528157	0.18164	EDN1;RGS2;HRH1;EDN2;CHRNA7;HMOX1;ADM;PTGS2;ADA;ICAM1;CTGF;PPARD
regulation of organelle assembly (GO:1902115)	13/80	0.0902022	0.708991	-0.508625	0.174922	USP6NL;EDN1;IFT140;PLK2;SPICE1;TBC1D2B;IFT88;TBC1D7;HAP1;ARHGEF5;TBC1D15;TBC1D10A;CDK5RAP2
activation of signaling protein activity involved in unfolded protein response (GO:0006987)	1964-11-01	0.0868642	0.708991	-0.382899	0.131684	TSPYL2;DNAJC3;HSPA5;FKBP14;WFS1;DDIT3;LMNA;EIF2AK3;PARP16;ATF6;ATF3
glutamine family amino acid metabolic process (GO:0009064)	1965-11-01	0.0934612	0.708991	-0.301207	0.103589	GCLC;ARG2;OAT;GOT1;ASNSD1;GFPT2;GGH;SLC1A3;ASL;ASRGL1;GLS
regulation of viral genome replication (GO:0045069)	1957-10-01	0.0908443	0.708991	-0.279126	0.0959949	SRPK2;ISG20;APOBEC3C;IFITM1;TNIP1;SLPI;YTHDC2;ZC3HAV1;TRIM38;OASL
Golgi organization (GO:0007030)	1957-10-01	0.0908443	0.708991	-0.187398	0.0644486	USP6NL;ARFGEF1;BCAS3;PLK3;TMED9;GOLGB1;ATL2;COG1;GCC2;TJAP1
cellular glucose homeostasis (GO:0001678)	1949-09-01	0.0870404	0.708991	-0.181923	0.0625654	TJP1;MLXIPL;UCP2;PPARGC1A;FOXO1;AACS;SOX4;PCK2;ICAM1
base-excision repair (GO:0006284)	1942-08-01	0.0896521	0.708991	0.00738544	-0.00253994	POLB;PRMT6;USP47;NEIL2;PARP1;OGG1;RPA2;CCNO
aspartate family amino acid metabolic process (GO:0009066)	1942-08-01	0.0896521	0.708991	0.0646616	-0.0222379	GOT1;ADI1;ASNSD1;MTR;ADSS;ALDH7A1;ASRGL1;GCAT
androgen receptor signaling pathway (GO:0030521)	1942-08-01	0.0896521	0.708991	0.0767726	-0.026403	AR;MED24;MED30;NCOA3;NCOA4;PPARGC1A;PIAS1;NKX3-1
negative regulation of ERK1 and ERK2 cascade (GO:0070373)	1935-07-01	0.0913615	0.708991	0.30476	-0.104811	SLC9A3R1;PTPN1;ANKRD26;DUSP3;TNIP1;CNKSR3;DUSP6
organelle transport along microtubule (GO:0072384)	1935-07-01	0.0913615	0.708991	0.307437	-0.105731	KIF3A;NDE1;CEP152;KIF3C;HAP1;KIFAP3;PRKCZ
hexose catabolic process (GO:0019320)	1935-07-01	0.0913615	0.708991	0.377914	-0.129969	RPIA;GALT;HIBADH;FUT10;PGM2;PGD;PGM2L1
alditol phosphate metabolic process (GO:0052646)	1935-07-01	0.0913615	0.708991	0.394225	-0.135579	PLA2G16;GK;ACP6;LPCAT3;MBOAT1;PLA2G4A;SERINC5
positive regulation of BMP signaling pathway (GO:0030513)	2016-06-28	0.0914578	0.708991	0.833888	-0.286784	NOTCH2;TWSG1;BMPR2;MSX2;HES1;CYR61
positive regulation of protein acetylation (GO:1901985)	2016-05-21	0.0885989	0.708991	1.58444	-0.544909	RPS6KA5;ARID5A;SNAI2;PPARGC1A;SOX4
positive regulation of peptidyl-lysine acetylation (GO:2000758)	2016-05-21	0.0885989	0.708991	1.58976	-0.546739	RPS6KA5;ARID5A;SNAI2;PPARGC1A;SOX4
positive regulation of T cell mediated cytotoxicity (GO:0001916)	2016-05-21	0.0885989	0.708991	1.75014	-0.601896	HLA-H;HLA-C;HLA-A;MR1;HLA-E
negative regulation of reactive oxygen species metabolic process (GO:2000378)	2016-05-21	0.0885989	0.708991	1.75235	-0.602653	MPV17L;SIRT5;AATF;BIRC3;PLIN5
myotube cell development (GO:0014904)	2016-05-21	0.0885989	0.708991	1.81956	-0.625768	BIN3;GPX1;HOMER1;SMYD3;KIAA1161
response to thyroid hormone (GO:0097066)	2016-04-15	0.094169	0.708991	3.94586	-1.35703	CTSL;GBA;PPARGC1A;CTSB
positive regulation of microtubule polymerization or depolymerization (GO:0031112)	2016-04-15	0.094169	0.708991	4.19165	-1.44156	RGS2;SPAST;APC;TERF1
mammary gland epithelial cell proliferation (GO:0033598)	2016-04-15	0.094169	0.708991	4.19295	-1.44201	CEBPB;TFAP2C;BTRC;EPHA2
regulation of interleukin-8 secretion (GO:2000482)	2016-04-15	0.094169	0.708991	4.23703	-1.45717	ANXA1;ANXA4;C5AR2;CD58
short-chain fatty acid metabolic process (GO:0046459)	2016-04-15	0.094169	0.708991	4.38318	-1.50743	ACSS2;PCCA;MMAA;ACADS
nucleobase biosynthetic process (GO:0046112)	2016-04-15	0.094169	0.708991	4.38907	-1.50945	PRPS1;SHMT1;ADA;DHODH
aspartate family amino acid catabolic process (GO:0009068)	2016-04-15	0.094169	0.708991	4.4733	-1.53842	GOT1;ALDH7A1;GCAT;ASRGL1
copper ion homeostasis (GO:0055070)	2016-04-15	0.094169	0.708991	4.5777	-1.57433	MT2A;SLC31A2;COMMD1;ATOX1
mitochondrial calcium ion homeostasis (GO:0051560)	2016-04-15	0.094169	0.708991	4.80755	-1.65338	MCUR1;MICU2;MICU1;SLC8B1
chondrocyte development (GO:0002063)	2016-04-15	0.094169	0.708991	4.83047	-1.66126	BMPR2;MSX2;EIF2AK3;MIA3
polyol transport (GO:0015791)	2016-03-09	0.0940092	0.708991	8.22101	-2.82731	PGAP1;SLC5A3;SLC26A6
regulation of vitamin D biosynthetic process (GO:0060556)	2016-03-09	0.0940092	0.708991	8.41016	-2.89236	VDR;SNAI1;SNAI2
tonic smooth muscle contraction (GO:0014820)	2016-03-09	0.0940092	0.708991	8.77933	-3.01932	BBS2;EDN1;EDN2
myoblast migration (GO:0051451)	2016-03-09	0.0940092	0.708991	9.06149	-3.11636	NET1;BIN3;SIX1
cell migration involved in heart development (GO:0060973)	2016-03-09	0.0940092	0.708991	9.15172	-3.14739	MESP1;SNAI2;PITX2
regulation of extracellular matrix disassembly (GO:0010715)	2016-03-09	0.0940092	0.708991	9.15491	-3.14849	CST3;MFI2;ETS1
regulation of centriole replication (GO:0046599)	2016-03-09	0.0940092	0.708991	9.16278	-3.15119	PLK2;SPICE1;CDK5RAP2
activation of MAPKKK activity (GO:0000185)	2016-03-09	0.0940092	0.708991	9.196	-3.16262	GADD45B;GADD45A;TAB1
interleukin-6-mediated signaling pathway (GO:0070102)	2016-03-09	0.0940092	0.708991	9.26242	-3.18546	GALT;CTR9;GAB1
histone-serine phosphorylation (GO:0035404)	2016-03-09	0.0940092	0.708991	9.29847	-3.19786	PRKAA1;RPS6KA5;AURKB
response to lipoprotein particle (GO:0055094)	2016-03-09	0.0940092	0.708991	9.3619	-3.21967	ABCA1;HMGCS1;SREBF2
import into cell (GO:0098657)	2016-03-09	0.0940092	0.708991	9.59435	-3.29961	STEAP3;ATP2B4;CLN8
negative regulation of cardiac muscle hypertrophy (GO:0010614)	2016-03-09	0.0940092	0.708991	9.59989	-3.30152	RGS2;P2RX4;ATP2B4
histone H2B ubiquitination (GO:0033523)	2016-03-09	0.0940092	0.708991	9.60838	-3.30444	RNF20;CTR9;CDC73
DNA damage response, detection of DNA damage (GO:0042769)	2016-03-09	0.0940092	0.708991	9.72694	-3.34521	MRPS35;PARP1;SOX4
protoporphyrinogen IX biosynthetic process (GO:0006782)	2016-03-09	0.0940092	0.708991	9.87403	-3.3958	ALAD;ALAS1;PPOX
response to nitrosative stress (GO:0051409)	2016-03-09	0.0940092	0.708991	10.0647	-3.46138	GCLC;GSTM1;DUSP6
negative regulation of lipopolysaccharide-mediated signaling pathway (GO:0031665)	2016-03-09	0.0940092	0.708991	10.2936	-3.5401	SIGIRR;PRDM1;TRIB1
hepatocyte differentiation (GO:0070365)	2016-03-09	0.0940092	0.708991	10.3009	-3.5426	HHEX;ANXA1;E2F7
N-acetylneuraminate metabolic process (GO:0006054)	2016-03-09	0.0940092	0.708991	10.8911	-3.74559	CMAS;NPL;ST3GAL1
positive regulation of mitochondrial calcium ion concentration (GO:0051561)	2016-03-09	0.0940092	0.708991	11.165	-3.83977	MCUR1;MICU2;MICU1
determination of left/right symmetry (GO:0007368)	1950-09-01	0.0946634	0.711538	0.0202247	-0.00688301	DYNC2LI1;NOTCH2;GALNT11;STIL;IFT88;KIF3A;BBS7;PITX2;DISP1
regionalization (GO:0003002)	33/247	0.0949228	0.71192	-0.851728	0.289409	MESP1;RARG;PGAP1;BMPR2;SEMA3C;TULP3;PSEN1;PCSK5;LRP6;HHEX;ARL13B;KIF3A;TTC21B;TMEM107;TCTN1;PLXNA2;ALX1;HOXA5;NKX3-1;HES7;EDN1;MSX2;DUSP6;TBX3;DISP1;IFT88;ARC;MAFB;APC;LHX2;ABI1;SNAI1;HOXD9
regulation of angiogenesis (GO:0045765)	25/179	0.0950691	0.71192	-0.731911	0.248696	BTG1;NPR1;CHRNA7;SERPINE1;HSPB1;ADM;PTGS2;TSPAN12;THBS1;ETS1;DLL4;HHEX;HMOX1;CYP1B1;HOXA5;TNFRSF12A;ERAP1;VASH2;EMP2;PGF;RUNX1;PDCL3;ID1;ANGPTL4;EPHA2
epithelial cell proliferation (GO:0050673)	1973-12-01	0.0951831	0.71192	-0.3198	0.108665	FERMT1;SCARB1;TFAP2C;CEBPB;HMOX1;PSEN1;BTRC;LGR4;EPHA2;NKX3-1;LOXL2;PPARD
protein heterooligomerization (GO:0051291)	13/81	0.0962195	0.717315	-0.377156	0.125306	PRKAA1;STXBP3;GCH1;IDE;HBA1;KCNAB2;PRKCZ;GCHFR;MED24;CASP8;PDSS2;ALDOC;BIRC3
ethanolamine-containing compound metabolic process (GO:0042439)	13/81	0.0962195	0.717315	-0.329901	0.109606	PNPLA8;MBOAT1;PLA2G4A;SGMS2;PLA2G15;PLA2G16;SPTLC2;SMPD1;LPCAT3;LPCAT2;ALDH7A1;SMPDL3A;LPIN3
regulation of mitochondrion organization (GO:0010821)	15/97	0.0968127	0.719383	-0.578399	0.190502	SH3GLB1;VAT1;GPX1;UQCC2;BIK;BNIP3;MPV17L;OMA1;DHODH;BCL2L11;CASP8;YWHAQ;LMNA;DNM1L;PPARGC1A
cellular response to reactive oxygen species (GO:0034614)	14/89	0.0967243	0.719383	-0.440958	0.145235	PRKAA1;ANXA1;GPX1;BNIP3;FOS;HBA1;PTPRK;ETS1;KLF2;FOXO1;CST3;NET1;CAT;CYP1B1
positive regulation of proteasomal protein catabolic process (GO:1901800)	1958-10-01	0.0980891	0.724286	-0.0846623	0.0273094	PLK3;DAB2;GCLC;ESPL1;PLK2;PSEN1;BBS7;TRIB1;CLU;PIAS1
acylglycerol biosynthetic process (GO:0046463)	1943-08-01	0.0981086	0.724286	0.222826	-0.0718768	DGAT1;ELOVL4;GK;TECR;PNPLA3;LPL;ELOVL7;AGPAT4
neutral lipid biosynthetic process (GO:0046460)	1943-08-01	0.0981086	0.724286	0.227176	-0.0732798	DGAT1;GK;ELOVL4;TECR;PNPLA3;LPL;ELOVL7;AGPAT4
carbohydrate derivative transport (GO:1901264)	1943-08-01	0.0981086	0.724286	0.271721	-0.0876488	SLC35A1;SLC25A26;SCARB1;G6PC3;SLC35B4;SLC35D1;SLC25A19;SLC29A3
steroid metabolic process (GO:0008202)	32/240	0.100534	0.726607	-0.755216	0.241193	IDI1;SCARB1;PRKAA1;INSIG1;AKR1B1;ADM;HMGCR;HSD17B11;CLN8;HSD17B7;SULT1A1;EBP;SCP2;CYP11A1;CYP2R1;PMVK;FDXR;CYP1B1;PPARGC1A;ABCA1;WWOX;STARD5;HMGCS1;AKR1C1;SRD5A3;SREBF2;SQLE;AMACR;CAT;DHCR7;PPARD;LGMN
organic hydroxy compound catabolic process (GO:1901616)	1966-11-01	0.100352	0.726607	-0.190158	0.0607306	GK5;SCARB1;IMPA1;GK;PNPLA8;MAOA;SMPD1;SRD5A3;DIO3;SMPDL3A;NUDT3
positive regulation of nuclease activity (GO:0032075)	1966-11-01	0.100352	0.726607	-0.168488	0.0538099	TSPYL2;DNAJC3;HSPA5;FKBP14;WFS1;DDIT3;LMNA;EIF2AK3;PARP16;ATF6;ATF3
dorsal/ventral pattern formation (GO:0009953)	1966-11-01	0.100352	0.726607	-0.146499	0.0467874	EDN1;IFT88;APC;ARL13B;LHX2;KIF3A;TTC21B;TCTN1;PSEN1;DUSP6;DISP1
regulation of cell adhesion mediated by integrin (GO:0033628)	1936-07-01	0.100816	0.726607	0.529499	-0.169106	ACER2;SERPINE1;CYP1B1;SNAI2;PTPN6;ADA;EPHA2
negative regulation of stress-activated MAPK cascade (GO:0032873)	1936-07-01	0.100816	0.726607	0.54226	-0.173182	PER1;DUSP3;DUSP10;TAOK3;DUSP19;ZNF675;FOXO1
response to cadmium ion (GO:0046686)	1936-07-01	0.100816	0.726607	0.5537	-0.176835	DTYMK;CYP11A1;OGG1;SLC11A2;HMOX1;MT1X;MT1E
negative regulation of stress-activated protein kinase signaling cascade (GO:0070303)	1936-07-01	0.100816	0.726607	0.56075	-0.179087	PER1;DUSP3;DUSP10;TAOK3;DUSP19;ZNF675;FOXO1
negative regulation of chromosome segregation (GO:0051985)	1936-07-01	0.100816	0.726607	0.603717	-0.192809	ESPL1;APC;UBE2D1;ANAPC4;ANAPC5;TERF1;MAD1L1
Notch receptor processing (GO:0007220)	2016-05-22	0.100807	0.726607	2.12945	-0.680082	DLL4;NOTCH2;GALNT11;JAG1;PSEN1
heterotypic cell-cell adhesion (GO:0034113)	2016-05-22	0.100807	0.726607	2.15694	-0.68886	PERP;PARVA;ITGAV;CD58;ITGA5
melanosome organization (GO:0032438)	2016-05-22	0.100807	0.726607	2.19794	-0.701955	RAB32;BLOC1S6;SNAPIN;AP3B1;LYST
cytokine metabolic process (GO:0042107)	2016-05-22	0.100807	0.726607	2.2045	-0.704051	CYP11A1;NOD1;IL1RAP;PCSK5;MYD88
regulation of viral entry into host cell (GO:0046596)	2016-05-22	0.100807	0.726607	2.24677	-0.71755	IFITM1;TRIM5;TRIM59;TRIM38;TRIM21
histone monoubiquitination (GO:0010390)	2016-05-22	0.100807	0.726607	2.34662	-0.74944	RNF20;CTR9;CDC73;RNF2;SKP1
regulation of cell adhesion (GO:0030155)	43/336	0.101852	0.727258	-0.814397	0.259365	SDC4;MFI2;LAMA4;SERPINE1;ADAM22;MIA3;PIK3R1;THBS1;PRKCZ;CYR61;ICAM1;RND1;PTPRG;ATXN3;CYTH2;UBASH3B;ZNF703;GCNT2;CYP1B1;ABL2;ITGAV;RSU1;KIFAP3;VAV3;BCAS3;MYO10;AP1AR;EMP2;ACER2;NET1;DAB2;CCDC80;BCL6;APC;SMOC1;SNAI2;ITGA6;PTPN6;ITGA5;TGFBI;CD44;ADA;EPHA2
positive regulation of myeloid cell differentiation (GO:0045639)	1974-12-01	0.101745	0.727258	-0.256793	0.081782	KITLG;JUN;JAG1;CASP8;SCIN;ASXL2;GNAS;FOS;FOXO3;ETS1;HOXA5;RUNX1
monocarboxylic acid catabolic process (GO:0072329)	13/82	0.102476	0.727258	-0.254422	0.081027	ACOT7;ABCD3;ECHS1;MMAA;PLA2G15;AMACR;PCCA;SCP2;EHHADH;IDNK;ACADS;DECR1;PPARD
cellular response to starvation (GO:0009267)	1974-12-01	0.101745	0.727258	-0.254153	0.0809414	TCF7L2;PRKAA1;JUN;BMPR2;NUAK2;HSPA5;UCP2;ATG2A;PDK4;RNASE4;FOXO1;CPEB4
circadian regulation of gene expression (GO:0032922)	1951-09-01	0.102662	0.727258	0.115255	-0.0367059	PER1;PRKCDBP;CRY1;ADK;RBM4B;NR1D1;AHR;PPARGC1A;CCRN4L
alcohol catabolic process (GO:0046164)	1951-09-01	0.102662	0.727258	0.127155	-0.0404958	GK5;SCARB1;IMPA1;GK;PNPLA8;SMPD1;SRD5A3;SMPDL3A;NUDT3
mitochondrial membrane organization (GO:0007006)	1951-09-01	0.102662	0.727258	0.132209	-0.0421052	BCL2L11;CNP;BNIP3;MFN2;THEM4;OMA1;CLN8;ALKBH7;SLC9A1
negative regulation of mitochondrion organization (GO:0010823)	2016-06-29	0.102133	0.727258	1.18033	-0.375905	VAT1;GPX1;BNIP3;LMNA;MPV17L;OMA1
regulation of mitochondrial membrane permeability (GO:0046902)	2016-06-29	0.102133	0.727258	1.18521	-0.377459	BCL2L11;CNP;BNIP3;THEM4;ALKBH7;SLC9A1
regulation of cell cycle checkpoint (GO:1901976)	2016-06-29	0.102133	0.727258	1.19934	-0.38196	RINT1;DYNC1LI1;CRY1;RPA2;NDRG1;CDK5RAP2
regulation of protein oligomerization (GO:0032459)	2016-06-29	0.102133	0.727258	1.24551	-0.396664	SH3GLB1;BCL2L11;BIK;IDE;DNM1L;CLU
positive regulation of kinase activity (GO:0033674)	59/480	0.108017	0.731943	-0.782049	0.24404	CDKN1A;FKBP14;DUSP19;CLU;CYR61;DSTYK;NBN;MAP3K6;MAP3K4;NKX3-1;TSPYL2;MAP2K3;VAV3;EDN1;RIPK2;GAB1;CDC25B;DNAJC3;MDFIC;DDIT3;DOK7;ATF6;ATF3;PRKAA1;SDC4;CHRNA7;CXCR4;TGFA;NOD1;DBF4B;PSEN1;ADRB2;MST1R;PRKCZ;THBS1;GNAI2;IRAK2;LMNA;S1PR2;MAP3K1;HSPA5;GADD45B;GADD45A;EGF;WFS1;KIDINS220;EIF2AK3;ATP2B4;PARP16;CENPE;CCDC88A;DAB2;KITLG;TAOK3;ABI1;UNC119;CSPG4;TAB1;CALM1
regulation of mitotic cell cycle (GO:0007346)	49/391	0.108192	0.731943	-0.77826	0.242858	CDKN1A;UBE2D1;BRCA2;AATF;CDC73;PSMD8;MCIDAS;NEK2;NBN;SOX4;NKX3-1;USP47;EDN1;TIPIN;ANXA1;DUSP3;HUS1;TERF1;CDC25C;CDC25B;RINT1;DYNC1LI1;ESPL1;MSH2;CHMP4C;ANAPC4;ANAPC5;MAD1L1;L3MBTL1;BLM;TGFA;DBF4B;AURKB;HES1;E2F7;PLK3;CDKN2B;CRADD;EGF;PLK2;NEK7;RPA2;ZWINT;CENPE;APC;TAOK3;NABP1;PTPN6;RAD9A
positive regulation of GTPase activity (GO:0043547)	59/482	0.113489	0.731943	-0.729619	0.227679	USP6NL;FAM13A;SNX13;RPGR;RCBTB2;ICAM1;RABGEF1;ARHGAP42;RGS2;RGS3;OPHN1;SH3BGRL3;SBF2;AGFG2;TBC1D10A;VAV3;BCAS3;RALGAPA1;ARHGEF17;TBC1D2B;ARAP1;GMIP;DEPDC1B;ACAP2;RP2;SPATA13;TBC1D7;ARHGEF3;CDC42EP2;RIN1;ARHGEF5;EPHA2;RGS16;ARHGEF28;ARHGAP19;ARHGAP18;CYTH2;ALS2CL;RGS20;EPS8L1;RSU1;TBC1D12;TBC1D15;ARFGEF1;MON2;RABGAP1L;STARD13;EIF2B3;JUN;CEP152;ARHGAP29;ARHGAP27;ARHGAP24;NET1;RABIF;GNAS;RGS10;RGL3;…
regulation of mitotic cell cycle phase transition (GO:1901990)	33/251	0.109276	0.731943	-0.708244	0.221009	BLM;CDKN1A;UBE2D1;DBF4B;CDC73;AURKB;PSMD8;NBN;E2F7;SOX4;PLK3;USP47;CDKN2B;TIPIN;ANXA1;CRADD;PLK2;RPA2;HUS1;TERF1;ZWINT;CENPE;ESPL1;APC;TAOK3;MSH2;CHMP4C;ANAPC4;NABP1;ANAPC5;PTPN6;MAD1L1;RAD9A
antigen processing and presentation (GO:0019882)	30/225	0.108863	0.731943	-0.688477	0.214841	RAB5B;ABCB9;IFI30;ICAM1;DYNC2LI1;PSMD8;CTSL;KIF3A;ITGAV;KIF3C;KIFAP3;MICA;MICB;RAB8B;DYNC1H1;HLA-H;ERAP1;HLA-C;AP3B1;LNPEP;HLA-A;MR1;HLA-E;RAB32;CENPE;RAET1G;KIF2C;ULBP1;ULBP3;LGMN
energy derivation by oxidation of organic compounds (GO:0015980)	27/198	0.103514	0.731943	-0.678815	0.211826	FASTKD1;STXBP1;ITPR2;PYGL;PGM2;PPARGC1A;GYG1;SLC25A25;TCF7L2;PRKAB2;GFPT2;PHKA1;PPP2R5D;NR1D1;PHKA2;GNG11;PGM2L1;MLXIPL;PPP1R3C;PPP1R3E;CAT;NDUFS4;GNAS;MTFR1;MTFR2;CALM1;SLC25A14
divalent metal ion transport (GO:0070838)	31/234	0.110379	0.731943	-0.677897	0.21154	MCUR1;CHRNA7;ITPR2;MAGT1;PSEN1;JPH1;ERO1L;CTGF;PANX1;NIPAL1;ITGAV;CNNM2;CAMK2G;SLC25A25;VDR;CACNA2D1;CACFD1;SLC11A2;ATP2B4;ZDHHC13;MCOLN1;ZDHHC17;SLC8B1;MCOLN2;TPCN2;P2RX4;STIM1;DDIT3;SELK;MICU2;MICU1
regulation of cell division (GO:0051302)	31/234	0.110379	0.731943	-0.666024	0.207835	L3MBTL1;BLM;UBE2D1;CCP110;TGFA;BRCA2;AURKB;NEK2;E2F7;NKX3-1;PLK3;EDN1;MSX2;EGF;KLHL21;CABLES1;TERF1;CDC25C;PGF;CDC25B;CENPE;ESPL1;APC;MSH2;CAT;CHMP4C;ANAPC4;TXNIP;ANAPC5;CALM1;MAD1L1
regulation of ossification (GO:0030278)	24/173	0.105316	0.731943	-0.658088	0.205358	PTGER4;OSR2;IFITM1;CEBPB;BMPR2;JAG1;IGFBP5;MSX2;TXLNG;MIA3;ADRB2;CYR61;LRP6;TWSG1;APC;SMOC1;ASXL2;ID1;GNAS;SNAI2;ID3;PDLIM7;CCRN4L;CD276
regulation of cell-substrate adhesion (GO:0010810)	21/149	0.11108	0.731943	-0.583082	0.181952	BCAS3;SDC4;MFI2;SERPINE1;AP1AR;EMP2;PIK3R1;THBS1;PRKCZ;CYR61;ACER2;NET1;ATXN3;DAB2;CCDC80;BCL6;SMOC1;GCNT2;ITGA6;RSU1;ITGA5
negative regulation of cell adhesion (GO:0007162)	17/115	0.106733	0.731943	-0.508616	0.158715	BCAS3;MFI2;SERPINE1;ADAM22;MIA3;AP1AR;PIK3R1;THBS1;RND1;ACER2;UBASH3B;BCL6;ZNF703;GCNT2;SNAI2;CYP1B1;TGFBI
regulation of microtubule-based process (GO:0032886)	18/124	0.110948	0.731943	-0.496928	0.155068	BBS2;PLK2;CEP120;SPICE1;MEMO1;TERF1;MID1;AURKB;NUBP1;RGS2;SPAST;APC;INPP5J;CEP250;NEK2;HAP1;CDK5RAP2;CLASP2
positive regulation of protein modification by small protein conjugation or removal (GO:1903322)	22/158	0.114011	0.731943	-0.492038	0.153542	FANCI;RWDD3;HSPA5;WFS1;EGF;RIPK2;ARRDC3;UBE2D1;COMMD1;ADRB2;CLU;PIAS1;PSMD8;RASSF1;TBC1D7;FBXO4;PELI1;ANAPC4;ANAPC5;BTRC;SKP1;BIRC3
response to monosaccharide (GO:0034284)	17/116	0.112326	0.731943	-0.447162	0.139538	TCF7L2;EIF2B3;GPX1;PTGS2;THBS1;AACS;ICAM1;CTGF;TJP1;MLXIPL;CYP11A1;UCP2;TXNIP;SOX4;SLC26A6;PCK2;PPARD
cellular response to hypoxia (GO:0071456)	15/99	0.108441	0.731943	-0.389202	0.121451	EGLN3;PRKAA1;EPAS1;BNIP3;SLC11A2;UBE2D1;PTGS2;NDRG1;VASN;ICAM1;LMNA;HMOX1;PPARGC1A;PPARD;NKX3-1
polyol metabolic process (GO:0019751)	15/99	0.108441	0.731943	-0.374968	0.11701	GOT1;GK;GBA;SLC5A3;NUDT3;ACER2;GK5;COQ3;SPTLC2;IMPA1;SCP2;ACER3;CYP2R1;INPP5J;CALM1
maintenance of protein location (GO:0045185)	16/108	0.113544	0.731943	-0.33376	0.104151	HSPA5;TONSL;CASC5;GCC2;AURKB;SYNE2;LATS1;ARL2BP;OS9;TAF8;FLNB;FOPNL;NFKBIE;TAF3;CLASP2;FBN1
activation of cysteine-type endopeptidase activity involved in apoptotic process (GO:0006919)	13/83	0.108972	0.731943	-0.244171	0.0761943	EGLN3;HIP1;CRADD;SLC11A2;EIF2AK3;NOD1;ROBO1;ACER2;BCL2L13;BCL2L11;CASP8;CASP1;NKX3-1
regulation of protein depolymerization (GO:1901879)	1967-11-01	0.107535	0.731943	-0.126308	0.0394148	EPS8;LIMA1;SPAST;SCIN;APC;SH3BGRL3;NES;SPTAN1;MID1;AURKB;CLASP2
steroid hormone mediated signaling pathway (GO:0043401)	1959-10-01	0.105663	0.731943	-0.0266429	0.00831399	NR4A2;NR4A1;AR;RARG;NR4A3;VDR;NR1D1;ESR2;PPARD;NKX3-1
positive regulation of epithelial cell differentiation (GO:0030858)	1952-09-01	0.111034	0.731943	0.192886	-0.0601905	MESP1;CDKN2B;KITLG;BTG1;APC;VDR;NCOA3;NUMB;S1PR2
negative regulation of I-kappaB kinase/NF-kappaB signaling (GO:0043124)	1944-08-01	0.106999	0.731943	0.279033	-0.087073	PER1;PPM1B;CASP8;TNIP1;TRIM59;C9ORF89;NFKBID;UACA
regulation of mitotic metaphase/anaphase transition (GO:0030071)	1944-08-01	0.106999	0.731943	0.298038	-0.0930035	CENPE;ESPL1;APC;UBE2D1;ANAPC4;ANAPC5;TERF1;MAD1L1
mitotic DNA integrity checkpoint (GO:0044774)	1937-07-01	0.110781	0.731943	0.769725	-0.240195	TIPIN;BLM;MSH2;TAOK3;RPA2;NBN;RAD9A
intermediate filament cytoskeleton organization (GO:0045104)	1937-07-01	0.110781	0.731943	0.772515	-0.241065	ATXN3;SYNM;TOR1A;KRT17;ARHGEF28;VIM;CLN8
embryonic hindlimb morphogenesis (GO:0035116)	2016-06-30	0.113428	0.731943	1.17138	-0.365531	OSR2;RARG;MSX2;GNAS;PITX2;LRP6
regulation of membrane permeability (GO:0090559)	2016-06-30	0.113428	0.731943	1.31661	-0.410851	BCL2L11;CNP;BNIP3;THEM4;ALKBH7;SLC9A1
platelet-derived growth factor receptor signaling pathway (GO:0048008)	2016-06-30	0.113428	0.731943	1.33783	-0.417473	MYO1E;PTPN1;GAB1;TXNIP;ARID5B;PLAT
response to sterol (GO:0036314)	2016-05-23	0.113804	0.731943	2.24588	-0.700833	ABCA1;HMGCS1;PMVK;AACS;LRP6
neural tube development (GO:0021915)	2016-05-23	0.113804	0.731943	2.33411	-0.728365	TCF7L2;STIL;SEMA3C;PLXNA2;EPHA2
pigment granule organization (GO:0048753)	2016-05-23	0.113804	0.731943	2.35639	-0.735318	RAB32;BLOC1S6;SNAPIN;AP3B1;LYST
positive regulation of transforming growth factor beta receptor signaling pathway (GO:0030511)	2016-05-23	0.113804	0.731943	2.37493	-0.741103	CDKN1C;TGFBR3;CDKN2B;DAB2;THBS1
prostaglandin metabolic process (GO:0006693)	2016-05-23	0.113804	0.731943	2.47068	-0.770982	EDN1;EDN2;PNPLA8;PTGS2;PTGES
spinal cord motor neuron differentiation (GO:0021522)	2016-05-23	0.113804	0.731943	2.47249	-0.771547	ISL2;LMO4;TCTN1;CLN8;SOX4
prostanoid metabolic process (GO:0006692)	2016-05-23	0.113804	0.731943	2.47732	-0.773055	EDN1;EDN2;PNPLA8;PTGS2;PTGES
phosphatidylethanolamine acyl-chain remodeling (GO:0036152)	2016-05-23	0.113804	0.731943	2.48285	-0.774781	PLA2G16;PNPLA8;LPCAT3;MBOAT1;PLA2G4A
cell differentiation involved in embryonic placenta development (GO:0060706)	2016-05-23	0.113804	0.731943	2.50133	-0.780548	CASP8;KRT8;SNAI1;PRDM1;E2F7
DNA catabolic process, exonucleolytic (GO:0000738)	2016-05-23	0.113804	0.731943	2.5372	-0.79174	ISG20;BLM;SLX4;EXO5;RAD9A
long-chain fatty-acyl-CoA metabolic process (GO:0035336)	2016-05-23	0.113804	0.731943	2.59931	-0.811121	ACOT7;DGAT1;ELOVL4;TECR;ELOVL7
reverse cholesterol transport (GO:0043691)	2016-04-16	0.109443	0.731943	4.21929	-1.31664	ABCA1;SCARB1;ABCA5;CLU
negative regulation of lipid storage (GO:0010888)	2016-04-16	0.109443	0.731943	4.26464	-1.33079	ABCA1;OSBPL8;ITGAV;ABHD5
regulation of triglyceride biosynthetic process (GO:0010866)	2016-04-16	0.109443	0.731943	4.3264	-1.35006	SCARB1;TCF7L2;FITM2;PLIN5
purine-containing compound salvage (GO:0043101)	2016-04-16	0.109443	0.731943	4.39534	-1.37158	PNP;ADK;DCK;ADA
endocytic recycling (GO:0032456)	2016-04-16	0.109443	0.731943	4.43423	-1.38371	SNX4;EHD4;MICALL2;EPG5
cellular response to sterol (GO:0036315)	2016-04-16	0.109443	0.731943	4.47711	-1.39709	ABCA1;HMGCS1;AACS;LRP6
protein hydroxylation (GO:0018126)	2016-04-16	0.109443	0.731943	4.60656	-1.43749	EGLN3;P4HA1;P4HA3;LEPREL1
anterograde synaptic vesicle transport (GO:0048490)	2016-04-16	0.109443	0.731943	4.74643	-1.48114	BLOC1S6;SNAPIN;AP3B1;AP3B2
early endosome to late endosome transport (GO:0045022)	2016-04-16	0.109443	0.731943	4.9702	-1.55096	FAM160A2;SNX16;AKTIP;LYST
limb bud formation (GO:0060174)	2016-03-10	0.11409	0.731943	9.64366	-3.00933	SEMA3C;PLXNA2;SOX4
positive regulation of receptor recycling (GO:0001921)	2016-03-10	0.11409	0.731943	9.83303	-3.06842	DAB2;ARAP1;PSEN1
negative regulation of B cell apoptotic process (GO:0002903)	2016-03-10	0.11409	0.731943	9.87062	-3.08015	BCL6;AURKB;ADA
cardiac right ventricle morphogenesis (GO:0003215)	2016-03-10	0.11409	0.731943	9.95269	-3.10576	JAG1;SEMA3C;SOX4
positive regulation of Cdc42 GTPase activity (GO:0043089)	2016-03-10	0.11409	0.731943	10.0591	-3.13896	BCAS3;ARAP1;ARHGAP27
negative regulation of keratinocyte proliferation (GO:0010839)	2016-03-10	0.11409	0.731943	10.2956	-3.21277	VDR;SNAI2;PTPRK
fatty acid homeostasis (GO:0055089)	2016-03-10	0.11409	0.731943	10.312	-3.21788	MLXIPL;PRKAA1;GOT1
negative regulation of muscle hypertrophy (GO:0014741)	2016-03-10	0.11409	0.731943	10.3194	-3.22021	RGS2;P2RX4;ATP2B4
regulation of plasminogen activation (GO:0010755)	2016-03-10	0.11409	0.731943	10.3558	-3.23155	MFI2;SERPINE1;THBS1
negative regulation of fibrinolysis (GO:0051918)	2016-03-10	0.11409	0.731943	10.5408	-3.28929	SERPINE1;THBS1;USF1
negative regulation of G2/M transition of mitotic cell cycle (GO:0010972)	2016-03-10	0.11409	0.731943	10.9807	-3.42655	USP47;CHMP4C;AURKB
centriole replication (GO:0007099)	2016-03-10	0.11409	0.731943	11.1419	-3.47686	CEP135;CEP152;CCP110
biotin metabolic process (GO:0006768)	2016-03-10	0.11409	0.731943	11.2127	-3.49894	MCCC2;PCCA;MCCC1
antigen processing and presentation of endogenous peptide antigen via MHC class I (GO:0019885)	2016-03-10	0.11409	0.731943	11.2325	-3.50514	ERAP1;HLA-C;HLA-A
peripheral nervous system neuron development (GO:0048935)	2016-03-10	0.11409	0.731943	11.2561	-3.51249	ISL2;HOXD9;RUNX1
regulation of ER to Golgi vesicle-mediated transport (GO:0060628)	2016-03-10	0.11409	0.731943	11.2778	-3.51925	SCFD1;INSIG1;USE1
misfolded or incompletely synthesized protein catabolic process (GO:0006515)	2016-03-10	0.11409	0.731943	11.5292	-3.59771	ATXN3;TOR1A;OMA1
negative regulation of glycoprotein biosynthetic process (GO:0010561)	2016-03-10	0.11409	0.731943	11.5483	-3.60367	ACER2;AATF;HBEGF
regulation of cytokine production involved in inflammatory response (GO:1900015)	2016-03-10	0.11409	0.731943	11.6414	-3.63273	PER1;IL17RC;IL17RA
positive regulation of GTP catabolic process (GO:0033126)	59/483	0.116293	0.73689	-0.639469	0.195241	USP6NL;FAM13A;SNX13;RPGR;RCBTB2;ICAM1;RABGEF1;ARHGAP42;RGS2;RGS3;OPHN1;SH3BGRL3;SBF2;AGFG2;TBC1D10A;VAV3;BCAS3;RALGAPA1;ARHGEF17;TBC1D2B;ARAP1;GMIP;DEPDC1B;ACAP2;RP2;SPATA13;TBC1D7;ARHGEF3;CDC42EP2;RIN1;ARHGEF5;EPHA2;RGS16;ARHGEF28;ARHGAP19;ARHGAP18;CYTH2;ALS2CL;RGS20;EPS8L1;RSU1;TBC1D12;TBC1D15;ARFGEF1;MON2;RABGAP1L;STARD13;EIF2B3;JUN;CEP152;ARHGAP29;ARHGAP27;ARHGAP24;NET1;RABIF;RGS10;GNAS;RGL3;…
negative regulation of cellular component organization (GO:0051129)	58/474	0.116209	0.73689	-0.631128	0.192694	MPV17L;UBE2D1;CLU;NUBP1;PTPRG;EPS8;RABGEF1;NEK2;JARID2;SPTAN1;CDK5RAP2;BCAS3;GPX1;LMO4;PAQR3;AP1AR;ARAP1;TERF1;MID1;TGFBR3;AR;ESPL1;MSH2;TBC1D7;NUMB;ANAPC4;ANAPC5;MAD1L1;PTGER4;PIF1;MFI2;INSIG1;OMA1;PSEN1;PRKCZ;THBS1;AURKB;CST3;LIMA1;SCIN;KATNA1;LMNA;INPP5J;CLASP2;VAT1;ARFGEF1;SNAPIN;BNIP3;SEMA4F;SMAD6;SVIP;ARHGAP24;VASN;BMP5;DAB2;APC;UNC119;VIM
regulation of protein complex assembly (GO:0043254)	32/244	0.1157	0.73689	-0.617314	0.188477	PTGER4;INSIG1;STXBP1;AHR;IDE;CLU;PRKCZ;ICAM1;EPS8;RGS2;BCL2L11;SCIN;INPP5J;RICTOR;DNM1L;SPTAN1;ATF7IP;SH3GLB1;UNC13B;ARFGEF1;VASP;MAP3K1;LMO4;BIK;SMAD6;TERF1;SVIP;LATS1;BBS10;APC;CDC42EP2;ARHGEF5
positive regulation of protein kinase activity (GO:0045860)	56/456	0.115972	0.73689	-0.614651	0.187664	CDKN1A;FKBP14;DUSP19;CLU;CYR61;MAP3K6;MAP3K4;NKX3-1;TSPYL2;MAP2K3;EDN1;RIPK2;GAB1;CDC25B;DNAJC3;MDFIC;DDIT3;DOK7;ATF6;ATF3;PRKAA1;SDC4;CHRNA7;CXCR4;TGFA;NOD1;DBF4B;PSEN1;ADRB2;MST1R;PRKCZ;THBS1;GNAI2;IRAK2;LMNA;S1PR2;MAP3K1;HSPA5;GADD45B;GADD45A;EGF;WFS1;KIDINS220;EIF2AK3;ATP2B4;PARP16;CENPE;CCDC88A;DAB2;KITLG;TAOK3;ABI1;UNC119;CSPG4;TAB1;CALM1
regulation of endothelial cell migration (GO:0010594)	14/92	0.115305	0.73689	-0.200125	0.0611017	SCARB1;BCAS3;EDN1;NRP2;BMPR2;HSPB1;EMP2;PRCP;PTGS2;THBS1;ETS1;DLL4;SH3BGRL3;EPHA2
negative regulation of protein secretion (GO:0050709)	1945-08-01	0.116317	0.73689	0.479339	-0.14635	PTGER4;RABGEF1;ANXA1;C5AR2;ANXA4;SERGEF;LGR4;TNFRSF21
regulation of metaphase/anaphase transition of cell cycle (GO:1902099)	1945-08-01	0.116317	0.73689	0.541379	-0.165293	CENPE;ESPL1;APC;UBE2D1;ANAPC4;ANAPC5;TERF1;MAD1L1
cellular response to interleukin-1 (GO:0071347)	1945-08-01	0.116317	0.73689	0.544765	-0.166326	EDN1;RPS6KA5;IL1R1;CYP11A1;IRAK2;KLF2;ICAM1;NKX3-1
cellular response to ionizing radiation (GO:0071479)	1945-08-01	0.116317	0.73689	0.579867	-0.177044	NET1;CDKN1A;BLM;GADD45A;HUS1;TMEM109;SNAI2;RAD9A
monocarboxylic acid biosynthetic process (GO:0072330)	23/167	0.116679	0.738158	-0.456477	0.138585	LIPT2;EDN1;PRKAB2;PRKAA1;EDN2;ACOT7;ACSS2;ELOVL4;PNPLA8;SHMT1;SCD5;TECR;LPL;SLC1A3;ELOVL7;PTGS2;FADS3;ALDH1A3;AMACR;SCP2;CSPG4;LTA4H;PTGES
ATP metabolic process (GO:0046034)	47/377	0.119892	0.753451	-0.587894	0.166428	ABCD4;PIF1;BLM;ABCD3;DDX27;ABCB7;YTHDC2;EIF4A3;AK1;DDX12P;ABCB8;ABCB9;IDE;RAD54B;SPAST;KIF3A;KATNA1;TOP1MT;KIF21A;LONRF3;KIF3C;MYH10;SLC25A25;ABCA1;ATF7IP;TOR3A;DYNC1H1;TOR1A;HSPA5;ABCA5;MYO10;ABCC5;HSPA6;STARD9;DDX10;CHD1L;GTF2H2;TOR1B;SMARCA2;CENPE;MYO1E;MYL6;RAD51D;MSH2;ATP6V1B2;MYH9;KIF2C
negative regulation of cell cycle process (GO:0010948)	33/254	0.120913	0.753451	-0.53403	0.151179	BLM;CDKN1A;UBE2D1;CDC73;NUBP1;AURKB;PSMD8;RASSF1;NBN;SOX4;E2F7;CDK5RAP2;PLK3;USP47;TIPIN;CDKN2B;CRADD;PLK2;HUS1;RPA2;TERF1;ZWINT;MLXIPL;ESPL1;APC;TAOK3;MSH2;CHMP4C;NABP1;ANAPC4;ANAPC5;MAD1L1;RAD9A
negative regulation of mitotic cell cycle (GO:0045930)	29/219	0.119645	0.753451	-0.500862	0.14179	BLM;CDKN1A;UBE2D1;CDC73;AURKB;PSMD8;NBN;E2F7;SOX4;NKX3-1;PLK3;USP47;CDKN2B;TIPIN;CRADD;PLK2;HUS1;RPA2;TERF1;ZWINT;APC;TAOK3;MSH2;CHMP4C;ANAPC4;NABP1;ANAPC5;MAD1L1;RAD9A
glycerolipid biosynthetic process (GO:0045017)	27/202	0.120648	0.753451	-0.448602	0.126995	PI4K2B;PIGU;MTMR3;TECR;LPL;ABHD5;PIK3R1;AGPAT4;IMPA1;INPP5J;SH3GLB1;GK;DGAT1;ELOVL4;PNPLA8;MBOAT1;PLA2G4A;SYNJ2;ELOVL7;PLA2G16;ETNK1;PIGA;LPCAT3;LPCAT2;PNPLA3;LPIN3;PIGH
regulation of embryonic development (GO:0045995)	15/101	0.120875	0.753451	-0.156234	0.0442284	HES7;FZD1;MESP1;OSR2;LAMA4;RBM19;SIX1;TULP3;DUSP6;LRP6;COL5A1;SNAI1;HES1;PHLDA2;CCRN4L
determination of bilateral symmetry (GO:0009855)	1953-09-01	0.119773	0.753451	0.361947	-0.102464	NOTCH2;DYNC2LI1;GALNT11;STIL;IFT88;KIF3A;BBS7;PITX2;DISP1
hindlimb morphogenesis (GO:0035137)	1938-07-01	0.121247	0.753451	0.87227	-0.246932	OSR2;RARG;MSX2;GNAS;PITX2;HOXD9;LRP6
lung alveolus development (GO:0048286)	1938-07-01	0.121247	0.753451	0.880591	-0.249288	FZD1;BMPR2;EDN2;MAN2A1;MAN1A2;ADA;HOXA5
cellular response to glucose stimulus (GO:0071333)	1938-07-01	0.121247	0.753451	0.89055	-0.252107	TJP1;MLXIPL;UCP2;AACS;SOX4;PCK2;ICAM1
positive regulation of fat cell differentiation (GO:0045600)	1938-07-01	0.121247	0.753451	0.925242	-0.261928	CEBPB;ASXL2;SNAI2;CREBL2;PTGS2;PPARD;CCRN4L
regulation of type I interferon-mediated signaling pathway (GO:0060338)	1938-07-01	0.121247	0.753451	0.972401	-0.275279	IFNAR2;PTPN1;SOCS1;STAT2;PTPN6;TYK2;USP18
intermediate filament-based process (GO:0045103)	1938-07-01	0.121247	0.753451	0.99107	-0.280564	ATXN3;SYNM;TOR1A;KRT17;ARHGEF28;VIM;CLN8
porphyrin-containing compound metabolic process (GO:0006778)	1938-07-01	0.121247	0.753451	1.00874	-0.285566	ALAD;ALAS1;SLC11A2;BLVRB;HMOX1;PPOX;HMOX2
negative regulation of proteolysis involved in cellular protein catabolic process (GO:1903051)	1961-10-01	0.121785	0.755767	0.274416	-0.0768426	PDCL3;OPHN1;APC;UBE2D1;ANAPC4;ANAPC5;PSEN1;TERF1;SVIP;MAD1L1
positive regulation of defense response (GO:0031349)	35/272	0.123035	0.756441	-0.537541	0.150044	PTGER4;SERPINE1;UBE2D1;NOD1;ZC3HAV1;DDX60;PTGS2;RPS6KA5;CASP8;IRAK2;CTSL;TRIM5;IKBKE;CTSB;MB21D1;MAP2K3;DUSP4;JUN;MAP3K1;DUSP3;CADM1;RIPK2;PPP2R5D;FOS;IL17RC;DUSP6;HLA-E;IL17RA;TNIP1;PELI1;TRIM15;TAB1;MYD88;LGMN;BIRC3
negative regulation of organelle organization (GO:0010639)	31/237	0.122534	0.756441	-0.532903	0.148749	PIF1;INSIG1;MPV17L;UBE2D1;OMA1;NUBP1;AURKB;EPS8;LIMA1;SCIN;LMNA;INPP5J;NEK2;JARID2;SPTAN1;CDK5RAP2;CLASP2;VAT1;ARFGEF1;GPX1;BNIP3;ARAP1;TERF1;MID1;ESPL1;APC;MSH2;TBC1D7;ANAPC4;ANAPC5;MAD1L1
cellular response to organic cyclic compound (GO:0071407)	37/291	0.128679	0.756441	-0.509841	0.142312	BLM;RARG;ITPR2;PTGS2;AACS;LRP6;HRH1;CASP8;CYP11A1;ZNF703;CYP1B1;SMYD3;BTRC;MB21D1;NKX3-1;ABCA1;BCAS3;ANXA1;HMGCS1;IGFBP5;MSX2;VDR;ATP2B4;NR1D1;FBXO32;ESR2;KLF2;NR4A2;AR;NR4A1;KLF5;P2RX4;NR4A3;GNAS;ITGA6;SLC26A6;PPARD
cellular chemical homeostasis (GO:0055082)	55/452	0.131064	0.756441	-0.456698	0.127478	SLC46A1;CLIC4;MCUR1;STEAP3;HEXB;ADM;TCIRG1;JPH1;NUBP1;AACS;ERO1L;ICAM1;MT2A;SOX4;EDN1;EDN2;SLC30A5;SLC11A2;ATP1B2;SLC35G1;DDIT3;ATP6V1B2;MICU2;MICU1;ABCB7;MFI2;CHRNA7;CXCR4;FITM2;PSEN1;FOXO1;CLN5;SLC9A1;LRP6;SLC9A3R1;UCP2;HMOX1;ABL2;PPARGC1A;HMOX2;WDTC1;PCK2;SLC31A2;WFS1;VDR;ATP2B4;MCOLN1;SLC8B1;TPCN2;ATOX1;TJP1;MLXIPL;PPT1;MON1A;SLC26A6
regulation of ERK1 and ERK2 cascade (GO:0070372)	22/161	0.129283	0.756441	-0.362488	0.101182	PTPN1;ANKRD26;DUSP3;RIPK2;C5AR2;STYX;NOD1;HMGCR;PRKCZ;DUSP6;CYR61;ICAM1;CTGF;SLC9A3R1;DSTYK;TNIP1;CNKSR3;PRKCDBP;GCNT2;PTPN6;CD44;EPHA2
negative regulation of immune system process (GO:0002683)	39/311	0.137841	0.756441	-0.350783	0.0979142	PTGER4;C5AR2;CTR9;ZC3H8;CBLB;PRDM1;PIK3R1;THBS1;CDC73;IL27RA;RABGEF1;DUSP10;HMOX1;HES1;HOXA5;PAG1;CD276;MICB;GPX1;DUSP3;HLA-A;NR1D1;RUNX1;BMP5;HLA-E;KITLG;PPM1B;MAFB;BCL6;IRF1;PELI1;PTPN6;TRIM38;PHPT1;ZNF675;NFKBID;LGR4;TNFRSF21;ADA
transcription initiation from RNA polymerase II promoter (GO:0006367)	25/187	0.13098	0.756441	-0.31743	0.0886044	NOTCH2;RARG;SERPINE1;UBE2D1;CTGF;MED30;PPARGC1A;CDKN2B;PARP1;TAF12;VDR;NR1D1;GTF2H2;ESR2;NR4A2;NR4A1;AR;MED24;NR4A3;RBL1;TFDP2;TAF4B;MAML3;TAF2;PPARD
positive regulation of sequence-specific DNA binding transcription factor activity (GO:0051091)	28/214	0.136142	0.756441	-0.222791	0.0621878	NOD1;PRKCZ;CLU;ICAM1;LRP6;RPS6KA5;IRAK2;TRIM5;ERC1;TRIM21;PPARGC1A;FZD1;TAF12;RIPK2;ARID5B;ESR2;FOSL1;TGFBR3;AR;PPAP2B;CTH;CAT;TRIM14;TRIM15;TRIM38;TAB1;RHEBL1;MYD88
sulfur compound biosynthetic process (GO:0044272)	20/145	0.134721	0.756441	-0.19588	0.054676	LIPT2;SLC26A2;ACSS2;GOT1;SLC35D1;ELOVL4;TPK1;TECR;MTR;PDHB;ELOVL7;PAPSS2;PAPSS1;EXT1;GCLC;ADI1;CTH;CSPG4;ST3GAL1;B4GALT4
positive regulation of endopeptidase activity (GO:0010950)	18/128	0.134013	0.756441	-0.19461	0.0543216	EGLN3;HIP1;CRADD;SLC11A2;EIF2AK3;NOD1;UACA;CYR61;ROBO1;CTGF;ACER2;BCL2L13;BCL2L11;CASP8;PERP;CASP1;TBC1D10A;NKX3-1
cell junction organization (GO:0034330)	25/189	0.141083	0.756441	-0.181264	0.0505964	FBF1;TESK2;PTPRK;F11R;PERP;ZNF703;MICALL2;CDH24;RSU1;RAB8B;VASP;CADM1;PARVA;SORBS1;MPP5;TJP1;APC;CLDN12;NUMB;SNAI2;ITGA6;ITGA5;FERMT2;VCL;PLEC
response to hexose (GO:0009746)	16/111	0.132193	0.756441	-0.124211	0.034671	TCF7L2;EIF2B3;GPX1;PTGS2;THBS1;AACS;ICAM1;CTGF;TJP1;MLXIPL;UCP2;TXNIP;SOX4;SLC26A6;PCK2;PPARD
positive regulation of cysteine-type endopeptidase activity involved in apoptotic process (GO:0043280)	16/111	0.132193	0.756441	-0.108117	0.0301787	EGLN3;HIP1;CRADD;SLC11A2;EIF2AK3;NOD1;UACA;CYR61;ROBO1;CTGF;ACER2;BCL2L13;BCL2L11;CASP8;CASP1;NKX3-1
DNA catabolic process (GO:0006308)	15/102	0.127392	0.756441	-0.104959	0.0292972	BLM;ENDOG;OGG1;XPA;RPA2;EXOG;GTF2H2;ISG20;H1F0;NEIL2;SLX4;EXO5;DNASE2;CCNO;RAD9A
positive regulation of protein ubiquitination (GO:0031398)	20/146	0.140524	0.756441	-0.102773	0.028687	FANCI;HSPA5;WFS1;EGF;RIPK2;ARRDC3;UBE2D1;COMMD1;ADRB2;CLU;PSMD8;RASSF1;TBC1D7;FBXO4;PELI1;ANAPC4;ANAPC5;BTRC;SKP1;BIRC3
mitochondrial transport (GO:0006839)	16/111	0.132193	0.756441	-0.0957118	0.0267161	PRKAB2;MCUR1;MTX3;AIP;TIMM44;PSEN1;GDAP1;SLC8B1;KIAA1279;MPC1;UCP2;SLC25A30;MFN2;MICU2;MICU1;SLC25A14
internal protein amino acid acetylation (GO:0006475)	16/111	0.132193	0.756441	-0.0760794	0.0212361	CCDC101;TAF12;NCOA3;YEATS4;ELP3;BRCA2;SUPT3H;POLE4;PER1;POR;ING3;MED24;KAT6B;EHHADH;TADA1;ASL
sensory organ development (GO:0007423)	15/103	0.134106	0.756441	-0.0458945	0.0128106	CDKN1C;RARG;WDR19;SIX1;TULP3;CST3;TWSG1;IFT88;MAFB;BCL2L11;SMOC1;BBS7;PITX2;NES;SLC25A25
regulation of steroid metabolic process (GO:0019218)	1977-12-01	0.123001	0.756441	0.0107866	-0.00301088	SEC14L2;PRKAA1;POR;SCP2;VDR;INSIG1;SNAI1;SNAI2;DHCR7;NR1D1;BMP5;LMF1
embryonic limb morphogenesis (GO:0030326)	13/86	0.129881	0.756441	0.022672	-0.00632846	NOTCH2;OSR2;RARG;MSX2;WDR19;PSEN1;TBX3;LRP6;GNAS;ALX1;PITX2;HOXD9;KIAA1715
embryonic appendage morphogenesis (GO:0035113)	13/86	0.129881	0.756441	0.0284793	-0.00794944	NOTCH2;OSR2;RARG;MSX2;WDR19;PSEN1;TBX3;LRP6;GNAS;ALX1;PITX2;HOXD9;KIAA1715
vascular process in circulatory system (GO:0003018)	13/86	0.129881	0.756441	0.0572169	-0.015971	BBS2;EDN1;EDN2;GPX1;GCH1;NPR1;ADM;ADRB2;MANF;TJP1;GCLC;HRH1;P2RX4
negative regulation of homeostatic process (GO:0032845)	13/86	0.129881	0.756441	0.0770053	-0.0214945	PIF1;ARRDC3;HMGCR;TERF1;MCOLN1;TPCN2;ERO1L;KITLG;MAFB;DDIT3;UCP2;ADA;HOXA5
negative regulation of binding (GO:0051100)	14/95	0.135837	0.756441	0.0853444	-0.0238222	JUN;PEX19;MSX2;ADRB2;AURKB;DAB2;SLPI;LHX2;ID1;HMOX1;NEK2;ZNF675;NES;NKX3-1
cellular response to alcohol (GO:0097306)	1970-11-01	0.130814	0.756441	0.226554	-0.0632381	ABCA1;PRKAA1;HMGCS1;MSX2;VDR;ZNF703;ITPR2;SMYD3;FBXO32;AACS;LRP6
eye development (GO:0001654)	1979-12-01	0.13846	0.756441	0.28222	-0.0787764	CDKN1C;CST3;RARG;TWSG1;IFT88;SMOC1;WDR19;TULP3;BBS7;PITX2;NES;SLC25A25
protein import into nucleus (GO:0006606)	1971-11-01	0.139139	0.756441	0.414541	-0.115711	IPO13;RERE;TCF7L2;JUN;EGF;RANBP17;LMNA;TXNIP;CBLB;HES1;PIK3R1
single-organism nuclear import (GO:1902593)	1971-11-01	0.139139	0.756441	0.417637	-0.116575	IPO13;RERE;TCF7L2;JUN;EGF;RANBP17;LMNA;TXNIP;HES1;CBLB;PIK3R1
regulation of cartilage development (GO:0061035)	1954-09-01	0.128873	0.756441	0.420159	-0.117279	RARG;POR;SCIN;SNAI2;KIAA1715;GLG1;CYR61;CTGF;LOXL2
pyruvate metabolic process (GO:0006090)	1971-11-01	0.139139	0.756441	0.458241	-0.127909	PFKFB4;PDPR;PFKFB3;PDP2;MPC1;PDK4;ALDOC;PPP2R5D;BPGM;PDHB;PCK2
specification of symmetry (GO:0009799)	1954-09-01	0.128873	0.756441	0.492282	-0.137411	DYNC2LI1;NOTCH2;GALNT11;IFT88;STIL;KIF3A;BBS7;PITX2;DISP1
regulation of alpha-beta T cell activation (GO:0046634)	1963-10-01	0.139179	0.756441	0.510797	-0.142579	BLM;PNP;BCL6;RIPK2;IRF1;NKAP;CBLB;AP3B1;PRKCZ;ADA
positive regulation of carbohydrate metabolic process (GO:0045913)	1963-10-01	0.139179	0.756441	0.513479	-0.143328	ARFGEF1;MLXIPL;TCF7L2;PRKAA1;HRH1;SMEK1;EGF;SORBS1;PPARGC1A;FOXO1
regulation of chromosome segregation (GO:0051983)	1963-10-01	0.139179	0.756441	0.516706	-0.144228	ESPL1;APC;UBE2D1;ANAPC4;KIF2C;NEK2;ANAPC5;TERF1;MAD1L1;AURKB
regulation of blood vessel size (GO:0050880)	1963-10-01	0.139179	0.756441	0.545806	-0.152351	BBS2;EDN1;GCLC;EDN2;P2RX4;GPX1;GCH1;NPR1;ADRB2;MANF
positive regulation of endothelial cell migration (GO:0010595)	1955-09-01	0.138328	0.756441	0.578084	-0.161361	BCAS3;SCARB1;EDN1;NRP2;BMPR2;HSPB1;PTGS2;THBS1;ETS1
positive regulation of histone modification (GO:0031058)	1955-09-01	0.138328	0.756441	0.585927	-0.16355	RNF20;RPS6KA5;CTR9;ASXL2;ARID5A;SNAI2;JARID2;PPARGC1A;PHF19
sphingolipid biosynthetic process (GO:0030148)	1963-10-01	0.139179	0.756441	0.586198	-0.163626	ACER2;CERS6;SPTLC2;SPTLC3;PPAP2B;SMPD1;GBA;ACER3;SGMS2;CLN8
positive regulation of smooth muscle cell proliferation (GO:0048661)	1946-08-01	0.126054	0.756441	0.587738	-0.164056	JUN;EDN1;HMOX1;HMGCR;PTGS2;PPARGC1A;MYD88;HBEGF
nucleotide-binding domain, leucine rich repeat containing receptor signaling pathway (GO:0035872)	1946-08-01	0.126054	0.756441	0.595519	-0.166228	PANX1;CASP8;RIPK2;IRAK2;CASP1;TXNIP;NOD1;TAB1
JNK cascade (GO:0007254)	1955-09-01	0.138328	0.756441	0.668426	-0.186578	PTGER4;DUSP10;RIPK2;IRAK2;DUSP19;NOD1;TAB1;TRIB1;MYD88
DNA duplex unwinding (GO:0032508)	1955-09-01	0.138328	0.756441	0.691137	-0.192917	SETX;PIF1;HELB;BLM;DDX12P;NBN;CHD1L;RAD54B;MCM2
respiratory gaseous exchange (GO:0007585)	1946-08-01	0.126054	0.756441	0.73045	-0.203891	EDN1;MAFB;TLX3;NDUFA12;MAN2A1;MAN1A2;BPGM;HOXA5
histone H3 acetylation (GO:0043966)	1946-08-01	0.126054	0.756441	0.731002	-0.204045	CCDC101;POLE4;PER1;TAF12;KAT6B;TADA1;BRCA2;SUPT3H
acid secretion (GO:0046717)	1947-08-01	0.136201	0.756441	0.804764	-0.224634	SLC9A3R1;ANXA1;PNPLA8;STXBP1;MYO6;PLA2G4A;SLC26A6;GLS
pyrimidine nucleotide metabolic process (GO:0006220)	1947-08-01	0.136201	0.756441	0.886241	-0.247377	PRPS1;DTYMK;RP2;UPRT;NT5M;DCK;CCNO;DHODH
termination of G-protein coupled receptor signaling pathway (GO:0038032)	1939-07-01	0.132199	0.756441	1.18681	-0.331274	RGS2;RGS3;RGS16;RGS10;MYH9;RGS20;SNX13
spindle assembly (GO:0051225)	1939-07-01	0.132199	0.756441	1.18734	-0.331423	NEK7;STARD9;HAUS4;SPICE1;NEK2;HAUS5;SAC3D1
positive regulation of muscle contraction (GO:0045933)	1931-06-01	0.125325	0.756441	1.50571	-0.42029	RGS2;EDN1;EDN2;PTGS2;ADA;CTGF
regulation of smooth muscle cell migration (GO:0014910)	1931-06-01	0.125325	0.756441	1.51276	-0.422258	P2RY6;IGFBP5;IGFBP3;SERPINE1;TRIB1;PPARD
adherens junction assembly (GO:0034333)	1931-06-01	0.125325	0.756441	1.52055	-0.424432	ZNF703;TESK2;SORBS1;PTPRK;VCL;FERMT2
endosome to lysosome transport (GO:0008333)	1931-06-01	0.125325	0.756441	1.76923	-0.493845	FAM160A2;SNAPIN;SNX16;SNX27;AKTIP;ADRB2
negative regulation of JNK cascade (GO:0046329)	1932-06-01	0.137801	0.756441	1.87231	-0.522618	PER1;DUSP3;DUSP10;TAOK3;DUSP19;ZNF675
activation of Ras GTPase activity (GO:0032856)	1932-06-01	0.137801	0.756441	1.90631	-0.532109	BCAS3;RALGAPA1;CEP152;TBC1D7;ARHGAP24;EPHA2
serine family amino acid metabolic process (GO:0009069)	1932-06-01	0.137801	0.756441	1.91305	-0.533992	GCLC;PDPR;CTH;SHMT1;SEPHS2;GCAT
mitotic spindle assembly checkpoint (GO:0007094)	1932-06-01	0.137801	0.756441	1.92415	-0.537088	APC;UBE2D1;ANAPC4;ANAPC5;TERF1;MAD1L1
androgen metabolic process (GO:0008209)	1932-06-01	0.137801	0.756441	1.93268	-0.53947	SCARB1;CYP11A1;SRD5A3;ADM;HSD17B11;PPARGC1A
pteridine-containing compound metabolic process (GO:0042558)	1932-06-01	0.137801	0.756441	1.97116	-0.55021	QDPR;SLC46A1;GCH1;SPR;SHMT1;MTR
mesenchymal cell development (GO:0014031)	2016-05-24	0.127557	0.756441	2.52903	-0.70593	EDN1;JAG1;SNAI2;ALX1;HES1
negative regulation of embryonic development (GO:0045992)	2016-05-24	0.127557	0.756441	2.59351	-0.723928	MESP1;COL5A1;SNAI1;TULP3;LRP6
vasodilation (GO:0042311)	2016-05-24	0.127557	0.756441	2.69462	-0.752152	BBS2;P2RX4;GPX1;GCH1;ADRB2
regulation of centrosome cycle (GO:0046605)	2016-05-24	0.127557	0.756441	2.74278	-0.765594	PLK2;SPICE1;NEK2;NUBP1;CDK5RAP2
sprouting angiogenesis (GO:0002040)	2016-05-24	0.127557	0.756441	2.82024	-0.787216	PARVA;THBS1;PGF;E2F7;LOXL2
intraciliary transport (GO:0042073)	2016-05-24	0.127557	0.756441	2.84894	-0.795226	IFT140;TTC21B;WDR19;TTC30A;RPGR
cofactor transport (GO:0051181)	2016-05-24	0.127557	0.756441	2.85537	-0.79702	SLC25A26;SLC46A1;ABCB7;PPT1;SLC19A2
activation of Rho GTPase activity (GO:0032862)	2016-05-24	0.127557	0.756441	2.89205	-0.80726	BCAS3;CEP152;TBC1D7;ARHGAP24;EPHA2
acyl-CoA biosynthetic process (GO:0071616)	2016-05-24	0.127557	0.756441	2.90703	-0.811442	ACSS2;ELOVL4;TECR;ELOVL7;PDHB
pancreas development (GO:0031016)	2016-05-25	0.142026	0.756441	2.90919	-0.812043	TCF7L2;IFT88;HHEX;EIF2AK3;SELT
thioester biosynthetic process (GO:0035384)	2016-05-24	0.127557	0.756441	2.92649	-0.816872	ACSS2;ELOVL4;TECR;ELOVL7;PDHB
phospholipid catabolic process (GO:0009395)	2016-05-24	0.127557	0.756441	2.96184	-0.826739	PNPLA8;SMPD1;NAPEPLD;PLA2G4A;SMPDL3A
regulation of T cell receptor signaling pathway (GO:0050856)	2016-05-25	0.142026	0.756441	2.97798	-0.831246	DUSP3;PTPN6;CBLB;PHPT1;ADA
positive regulation of histone methylation (GO:0031062)	2016-05-25	0.142026	0.756441	3.04494	-0.849935	RNF20;ASXL2;CTR9;JARID2;PHF19
regulation of T cell mediated cytotoxicity (GO:0001914)	2016-05-25	0.142026	0.756441	3.06451	-0.8554	HLA-H;HLA-C;HLA-A;MR1;HLA-E
regulation of microtubule depolymerization (GO:0031114)	2016-05-25	0.142026	0.756441	3.07414	-0.858088	SPAST;APC;MID1;AURKB;CLASP2
intrinsic apoptotic signaling pathway in response to endoplasmic reticulum stress (GO:0070059)	2016-05-25	0.142026	0.756441	3.09444	-0.863753	DDIT3;DNAJC10;SELK;EIF2AK3;ERO1L
maintenance of protein localization in organelle (GO:0072595)	2016-05-25	0.142026	0.756441	3.12787	-0.873084	OS9;HSPA5;ARL2BP;TAF8;TAF3
cytoplasmic microtubule organization (GO:0031122)	2016-05-25	0.142026	0.756441	3.16347	-0.883022	PLK3;IFT88;APC;KATNA1;CEP120
regulation of myelination (GO:0031641)	2016-05-25	0.142026	0.756441	3.1813	-0.887997	TCF7L2;RARG;EIF2AK3;TNFRSF21;ZPR1
very long-chain fatty acid metabolic process (GO:0000038)	2016-05-25	0.142026	0.756441	3.22136	-0.89918	ABCD3;ELOVL4;TECR;ACOT1;ELOVL7
anterograde axon cargo transport (GO:0008089)	2016-05-25	0.142026	0.756441	3.31817	-0.926202	BLOC1S6;SNAPIN;AP3B1;HAP1;AP3B2
negative regulation of peptidyl-serine phosphorylation (GO:0033137)	2016-04-17	0.125741	0.756441	4.61963	-1.28948	MLXIPL;CNKSR3;PAQR3;INPP5J
positive regulation of triglyceride metabolic process (GO:0090208)	2016-04-17	0.125741	0.756441	4.6605	-1.30089	SCARB1;TCF7L2;ABHD5;PLIN5
cellular response to glucose starvation (GO:0042149)	2016-04-17	0.125741	0.756441	4.69559	-1.31068	PRKAA1;NUAK2;HSPA5;CPEB4
regulation of developmental pigmentation (GO:0048070)	2016-04-17	0.125741	0.756441	4.70544	-1.31343	KITLG;BLOC1S6;BCL2L11;VPS33A
bone remodeling (GO:0046849)	2016-04-17	0.125741	0.756441	4.79912	-1.33958	NOTCH2;LGR4;EPHA2;LRP6
cofactor catabolic process (GO:0051187)	2016-04-17	0.125741	0.756441	4.81167	-1.34308	ACOT7;BLVRB;HMOX1;HMOX2
phosphatidylserine acyl-chain remodeling (GO:0036150)	2016-04-17	0.125741	0.756441	4.86557	-1.35813	PLA2G16;LPCAT3;MBOAT1;PLA2G4A
catechol-containing compound biosynthetic process (GO:0009713)	2016-04-18	0.142985	0.756441	4.99009	-1.39289	NR4A2;GPR37;GCH1;CHRNA7
regulation of protein ubiquitination involved in ubiquitin-dependent protein catabolic process (GO:2000058)	2016-04-18	0.142985	0.756441	5.01245	-1.39913	PDCL3;EGF;PSEN1;CLU
axoneme assembly (GO:0035082)	2016-04-17	0.125741	0.756441	5.04316	-1.4077	BBS2;IFT88;SPEF2;TPGS1
catecholamine biosynthetic process (GO:0042423)	2016-04-18	0.142985	0.756441	5.08529	-1.41946	NR4A2;GPR37;GCH1;CHRNA7
regulation of extracellular matrix organization (GO:1903053)	2016-04-18	0.142985	0.756441	5.12526	-1.43062	CST3;MFI2;CYP1B1;ETS1
protein localization to cell surface (GO:0034394)	2016-04-18	0.142985	0.756441	5.3115	-1.4826	MESDC2;PTPRK;VCL;FBLN5
regulation of receptor recycling (GO:0001919)	2016-04-18	0.142985	0.756441	5.32574	-1.48658	DAB2;AP1AR;ARAP1;PSEN1
cyclic nucleotide catabolic process (GO:0009214)	2016-04-18	0.142985	0.756441	5.37339	-1.49988	CNP;PDE4C;PDE7B;PDE8A
coenzyme A metabolic process (GO:0015936)	2016-04-18	0.142985	0.756441	5.37584	-1.50056	MCCC2;ACOT7;PANK3;HMGCR
decidualization (GO:0046697)	2016-04-18	0.142985	0.756441	5.4162	-1.51183	VDR;PTGS2;CTSB;PPARD
skeletal muscle fiber development (GO:0048741)	2016-04-18	0.142985	0.756441	5.43114	-1.516	GPX1;BIN3;HOMER1;KIAA1161
positive regulation of protein oligomerization (GO:0032461)	2016-04-18	0.142985	0.756441	5.53573	-1.54519	SH3GLB1;BCL2L11;BIK;IDE
cytokine biosynthetic process (GO:0042089)	2016-04-18	0.142985	0.756441	5.54438	-1.54761	NOD1;IL1RAP;PCSK5;MYD88
lipid translocation (GO:0034204)	2016-04-18	0.142985	0.756441	5.56786	-1.55416	ABCA1;ATP8B3;ATP10D;ATP9B
negative regulation of antigen receptor-mediated signaling pathway (GO:0050858)	2016-04-18	0.142985	0.756441	5.62355	-1.56971	DUSP3;CBLB;PTPN6;PHPT1
copper ion transport (GO:0006825)	2016-04-18	0.142985	0.756441	5.66052	-1.58003	STEAP3;SLC31A2;SLC11A2;ATOX1
phospholipid translocation (GO:0045332)	2016-04-18	0.142985	0.756441	5.69335	-1.58919	ABCA1;ATP8B3;ATP10D;ATP9B
response to hyperoxia (GO:0055093)	2016-04-18	0.142985	0.756441	5.69605	-1.58994	CDKN1A;BNIP3;CAT;FOXO1
response to increased oxygen levels (GO:0036296)	2016-04-18	0.142985	0.756441	5.73337	-1.60036	CDKN1A;BNIP3;CAT;FOXO1
maintenance of fidelity involved in DNA-dependent DNA replication (GO:0045005)	2016-04-18	0.142985	0.756441	5.81891	-1.62423	BLM;TIPIN;TONSL;BRCA2
polyol catabolic process (GO:0046174)	2016-04-18	0.142985	0.756441	5.87198	-1.63905	GK5;IMPA1;GK;NUDT3
regulation of vitamin metabolic process (GO:0030656)	2016-03-11	0.135613	0.756441	9.36553	-2.61421	VDR;SNAI1;SNAI2
cell morphogenesis involved in neuron differentiation (GO:0048667)	2016-03-11	0.135613	0.756441	10.033	-2.80051	SPR;SLC1A3;HES1
cell adhesion mediated by integrin (GO:0033627)	2016-03-11	0.135613	0.756441	10.2057	-2.84872	ITGA6;ITGA5;ICAM1
positive regulation of triglyceride biosynthetic process (GO:0010867)	2016-03-11	0.135613	0.756441	10.3173	-2.87988	SCARB1;TCF7L2;PLIN5
neural tube formation (GO:0001841)	2016-03-11	0.135613	0.756441	10.4251	-2.90995	CASP8;TCTN1;SOX4
positive regulation of microtubule polymerization (GO:0031116)	2016-03-11	0.135613	0.756441	10.4411	-2.91444	RGS2;APC;TERF1
response to folic acid (GO:0051593)	2016-03-11	0.135613	0.756441	10.5618	-2.94811	GPX1;OGG1;LRP6
cellular response to thyroid hormone stimulus (GO:0097067)	2016-03-11	0.135613	0.756441	10.5754	-2.95193	CTSL;PPARGC1A;CTSB
ventricular cardiac muscle cell development (GO:0055015)	2016-03-11	0.135613	0.756441	10.5875	-2.9553	LMNA;PITX2;MYH10
flavonoid metabolic process (GO:0009812)	2016-03-11	0.135613	0.756441	10.5895	-2.95584	SULT1A1;POR;PPARGC1A
negative regulation of cell cycle G2/M phase transition (GO:1902750)	2016-03-11	0.135613	0.756441	10.9106	-3.0455	USP47;CHMP4C;AURKB
protoporphyrinogen IX metabolic process (GO:0046501)	2016-03-11	0.135613	0.756441	10.9159	-3.04697	ALAD;ALAS1;PPOX
regulation of nuclear cell cycle DNA replication (GO:0033262)	2016-03-11	0.135613	0.756441	10.9467	-3.05555	TIPIN;DBF4B;TERF1
pinocytosis (GO:0006907)	2016-03-11	0.135613	0.756441	11.1615	-3.1155	DAB2;EHD4;PPT1
retina vasculature morphogenesis in camera-type eye (GO:0061299)	2016-03-11	0.135613	0.756441	11.1942	-3.12465	SLC4A7;CLIC4;CYP1B1
fructose metabolic process (GO:0006000)	2016-03-11	0.135613	0.756441	11.1947	-3.12477	PFKFB4;PFKFB3;ALDOC
angiogenesis involved in wound healing (GO:0060055)	2016-03-11	0.135613	0.756441	11.5017	-3.21046	GPX1;PRCP;ETS1
regulation of beta-amyloid formation (GO:1902003)	2016-03-11	0.135613	0.756441	11.6366	-3.24813	OLFM1;HAP1;CLU
dicarboxylic acid biosynthetic process (GO:0043650)	2016-03-11	0.135613	0.756441	12.2473	-3.4186	GOT1;SLC1A3;GLS
outflow tract morphogenesis (GO:0003151)	1940-07-01	0.143623	0.758057	1.37617	-0.381195	FZD1;JUN;SEMA3C;SIX1;HES1;THBS1;TBX3
microtubule bundle formation (GO:0001578)	1940-07-01	0.143623	0.758057	1.49885	-0.415175	BBS2;IFT88;SPEF2;SPAST;KATNA1;TPGS1;CDK5RAP2
membrane lipid biosynthetic process (GO:0046467)	13/88	0.144983	0.764347	0.336604	-0.0904567	PIGU;CERS6;GBA;SGMS2;CLN8;ACER2;SPTLC2;SPTLC3;PPAP2B;SMPD1;PIGA;ACER3;PIGH
regulation of protein catabolic process (GO:0042176)	33/260	0.146436	0.771119	-0.231782	0.0602431	MYCBP2;ARAF;UBE2D1;CBLB;PSEN1;CLU;FOXO1;CST3;OPHN1;TIMP1;BBS7;BTRC;CTSC;PLK3;GPX1;EGF;UQCC2;RHBDD1;PLK2;COMMD1;TERF1;SVIP;PIAS1;PDCL3;CENPE;DAB2;GCLC;ESPL1;APC;ANAPC4;ANAPC5;TRIB1;MAD1L1
positive regulation of intrinsic apoptotic signaling pathway (GO:2001244)	1948-08-01	0.146747	0.771862	1.02264	-0.264812	SLC9A3R1;STEAP3;BCL2L11;SIAH1;DNM1L;CLU;RAD9A;NKX3-1
positive regulation of organelle organization (GO:0010638)	42/340	0.146966	0.772123	-0.248859	0.0643578	C2CD5;SDC4;FHOD1;CTR9;TGFA;ICAM1;CTGF;RGS2;RPS6KA5;CASP8;BCL2L11;SPAST;SCIN;YWHAQ;RICTOR;JARID2;DNM1L;PPARGC1A;SH3GLB1;RNF20;VASP;BCAS3;EDN1;TMED9;MAP3K1;ANXA1;MSX2;EGF;UQCC2;BIK;BNIP3;ARID5A;TERF1;ESPL1;APC;ASXL2;CDC42EP2;SNAI2;HAP1;NES;ARHGEF5;PHF19
Wnt signaling pathway (GO:0016055)	30/234	0.14822	0.772208	-0.127281	0.0329022	AMER1;RARG;PRKAA1;CTR9;PSEN1;CDC73;LRP6;SLC9A3R1;HHEX;FRAT2;PITX2;BTRC;SOX4;WLS;MESDC2;TLE4;FZD1;TCF7L2;WWOX;RNF43;VAX2;DAB2;APC;PPAP2B;DDIT3;SNAI2;HBP1;LGR4;FERMT2;CD44
cellular modified amino acid metabolic process (GO:0006575)	26/199	0.147959	0.772208	-0.0922374	0.0238434	SLC46A1;ERO1LB;SHMT1;GSTT1;ERO1L;PRDX4;SEPHS2;GSTM4;GSTK1;EGLN3;GPX1;GSTM1;GCH1;MBOAT1;DIO3;PLA2G4A;PLA2G16;GCLC;P4HA1;GSTA4;CTH;LPCAT3;ETHE1;ALDH7A1;SERINC5;PCYOX1
regulation of nuclease activity (GO:0032069)	1972-11-01	0.147738	0.772208	0.545714	-0.141067	TSPYL2;DNAJC3;HSPA5;FKBP14;WFS1;DDIT3;LMNA;EIF2AK3;PARP16;ATF6;ATF3
regulation of tube size (GO:0035150)	1964-10-01	0.148339	0.772208	0.686823	-0.177544	BBS2;EDN1;GCLC;EDN2;P2RX4;GPX1;GCH1;NPR1;ADRB2;MANF
negative regulation of cellular protein catabolic process (GO:1903363)	1964-10-01	0.148339	0.772208	0.702465	-0.181588	PDCL3;APC;OPHN1;UBE2D1;ANAPC4;ANAPC5;PSEN1;TERF1;SVIP;MAD1L1
positive regulation of chromatin modification (GO:1903310)	1956-09-01	0.148129	0.772208	0.768057	-0.198543	RNF20;RPS6KA5;ASXL2;CTR9;ARID5A;SNAI2;JARID2;PPARGC1A;PHF19
RNA phosphodiester bond hydrolysis, endonucleolytic (GO:0090502)	1956-09-01	0.148129	0.772208	0.840235	-0.217201	DBR1;RNASEH2A;RNASET2;ELAC2;RPP40;RPP21;RNASE4;UTP20;RPP25
monosaccharide biosynthetic process (GO:0046364)	1956-09-01	0.148129	0.772208	0.857876	-0.221762	G6PC3;PMM1;GOT1;CRY1;ALDOC;PGD;PPARGC1A;ATF3;PCK2
glycerolipid metabolic process (GO:0046486)	37/296	0.149105	0.775314	-0.161067	0.0409894	PI4K2B;PIGU;PGAP1;MTMR3;INSIG1;TECR;LPL;ABHD5;PIK3R1;AGPAT4;IMPA1;ACP6;INPP5J;BPNT1;PIP4K2C;SH3GLB1;GPX1;GK;DGAT1;ELOVL4;PNPLA8;MBOAT1;PLA2G4A;SYNJ2;ELOVL7;PLA2G15;PLA2G16;LPCAT3;ETNK1;PIGA;CAT;LPCAT2;PNPLA3;PIGM;LPIN3;SERINC5;PIGH
negative regulation of protein transport (GO:0051224)	17/122	0.149507	0.775634	0.0618511	-0.0157148	PTGER4;FZD1;ANXA1;C5AR2;ANXA4;TONSL;UACA;LATS1;RABGEF1;PPM1B;MDFIC;SNAI2;NFKBIE;SERGEF;TNFRSF21;LGR4;SOX4
response to temperature stimulus (GO:0009266)	17/122	0.149507	0.775634	0.0903575	-0.0229576	EIF2B3;PRKAA1;HSPA6;LPL;ADM;ADRB2;FOS;THBS1;FOXO1;ERO1L;ATXN3;GCLC;CASP8;DNAJB4;PPARGC1A;MICA;MICB
positive regulation of peptidase activity (GO:0010952)	19/139	0.149714	0.775819	0.0322685	-0.00819089	EGLN3;HIP1;CRADD;PCOLCE2;SLC11A2;EIF2AK3;NOD1;UACA;CYR61;ROBO1;CTGF;ACER2;BCL2L13;BCL2L11;CASP8;PERP;CASP1;TBC1D10A;NKX3-1
regulation of glycoprotein metabolic process (GO:1903018)	1933-06-01	0.150831	0.779837	2.08379	-0.518178	ACER2;ARFGEF1;CST3;TCF7L2;AATF;HBEGF
positive regulation of autophagy (GO:0010508)	1933-06-01	0.150831	0.779837	2.09738	-0.521556	UVRAG;PRKAA1;BNIP3;PIM2;SVIP;FOXO1
regulation of cytoskeleton organization (GO:0051493)	43/350	0.151154	0.78062	-0.212121	0.0525354	PTGER4;CLIC4;SDC4;FHOD1;MYCBP2;NUBP1;AURKB;ICAM1;CTGF;EPS8;LIMA1;RGS2;SPAST;SCIN;INPP5J;CAPN2;CEP250;ABL2;NEK2;RICTOR;SH3BGRL3;SPTAN1;CDK5RAP2;CLASP2;VASP;ARFGEF1;BCAS3;EDN1;MAP3K1;PLK2;SPICE1;AP1AR;ARAP1;TERF1;MID1;CD2AP;LATS1;CCDC88A;APC;ALMS1;CDC42EP2;PHPT1;NES
regulation of cellular response to stress (GO:0080135)	49/404	0.151598	0.781076	-0.203774	0.050349	STEAP3;ULK4;DUSP19;HSPB1;CLU;SH3RF1;CTGF;DUSP10;MAP3K6;MAP3K4;NKX3-1;EDN1;GPR37;GPX1;DUSP3;RIPK2;GAB1;MID1;DUSP22;RINT1;IFT88;NSMCE4A;RNF169;MDFIC;CRY1;EEF1E1;ZNF675;CD44;TMEM161A;NOD1;HMGCR;FOXO1;FBLN5;SDCBP;SMYD2;TAF9B;RWDD3;MAP3K1;GADD45B;GADD45A;WFS1;RPA2;PER1;DAB2;TAOK3;SNAI1;SNAI2;MYD88;RAD9A
response to steroid hormone (GO:0048545)	45/369	0.155346	0.781076	-0.145452	0.0359385	CDKN1A;RARG;DTYMK;OGG1;GBA;ADM;PLAT;HOXB13;PTGS2;ETS1;THBS1;AACS;CTGF;CST3;CASP8;CYP11A1;RBBP5;ZNF703;HMOX1;SMYD3;ACADS;PCK2;NKX3-1;BCAS3;EDN1;GPX1;ANXA1;GOT1;MSX2;VDR;BCKDHB;NR1D1;FOS;FBXO32;SMAD6;ESR2;NR4A2;FOSL1;NR4A1;AR;NR4A3;TXNIP;FOSB;CALM1;PPARD
response to radiation (GO:0009314)	53/442	0.158444	0.781076	-0.0781375	0.0193064	CDKN1A;OGG1;PTPRK;BRCA2;ICAM1;TMEM109;MAP3K4;USP47;TIPIN;GPX1;ANXA1;HMGCS1;ELOVL4;ACTR5;HUS1;FOS;INIP;MSH2;CAT;CRY1;BLM;PRKAA1;TMEM161A;SDC4;SDC2;XPA;RBM4B;LPL;SLC1A3;HMGCR;PIK3R1;PTGS2;UACA;CRIP1;AURKB;HRH1;CYP11A1;PLK3;JUN;GADD45A;RHBDD1;AKR1C1;GTF2H2;USF1;NET1;PER1;KIAA0101;NABP1;NMT2;SNAI2;UNC119;CALM1;RAD9A
cellular response to fibroblast growth factor stimulus (GO:0044344)	24/183	0.155404	0.781076	-0.0592257	0.0146336	CDKN1A;EGF;GAB1;ITPR2;PIK3R1;FOXO3;SHCBP1;FOXO1;CTGF;DLL4;NR4A1;DSTYK;KITLG;AGO3;CYP11A1;NRG4;AGO1;SNAI2;THEM4;RICTOR;CALM1;CD44;HBEGF;TNRC6B
regulation of symbiosis, encompassing mutualism through parasitism (GO:0043903)	23/174	0.153539	0.781076	-0.0564485	0.0139474	SRPK2;APOBEC3C;IFITM1;JUN;YTHDC2;FUCA2;ZC3HAV1;GTF2H2;OASL;ISG20;BCL2L11;TNIP1;SLPI;MDFIC;TRIM5;CHMP4C;TRIM14;TRIM15;ITGAV;TRIM59;TRIM38;TRIM21;MYD88
cellular response to steroid hormone stimulus (GO:0071383)	17/123	0.156296	0.781076	0.0926431	-0.0228905	BCAS3;RARG;ANXA1;MSX2;VDR;NR1D1;FBXO32;ESR2;AACS;NR4A2;NR4A1;AR;NR4A3;ZNF703;SMYD3;PPARD;NKX3-1
tube formation (GO:0035148)	16/114	0.152485	0.781076	0.14143	-0.0349449	VASP;BCAS3;RARG;STIL;LMO4;SIX1;TULP3;ADM;LRP6;CASP8;BCL2L11;LHX2;TCTN1;ALX1;SOX4;PHACTR4
cell growth (GO:0016049)	15/106	0.155415	0.781076	0.217024	-0.0536228	NOTCH2;RARG;EDN1;NRP2;CADM1;EMP1;PRKCZ;NUBP1;SLC9A1;TGFBR3;ENOX2;AR;BIN3;LHX2;ITGAV
skeletal system morphogenesis (GO:0048705)	15/106	0.155415	0.781076	0.270362	-0.0668016	WWOX;OSR2;WDR48;IFT140;EIF4A3;WDR19;SIX1;ARID5B;PSEN1;LRP6;ASXL2;GNAS;ALX1;HOXD9;HOXA5
regulation of reactive oxygen species metabolic process (GO:2000377)	1981-12-01	0.154915	0.781076	0.441962	-0.109201	CDKN1A;STK17A;GADD45A;MPV17L;CYP1B1;SIRT5;PRCP;AATF;THBS1;FBLN5;BIRC3;PLIN5
negative regulation of T cell activation (GO:0050868)	1973-11-01	0.156606	0.781076	0.530256	-0.131017	DUSP3;BCL6;IRF1;PELI1;ZC3H8;CBLB;PTPN6;NFKBID;PAG1;TNFRSF21;CD276
regulation of BMP signaling pathway (GO:0030510)	1973-11-01	0.156606	0.781076	0.608473	-0.150343	FZD1;NOTCH2;TCF7L2;TWSG1;BMPR2;MSX2;HES1;SMAD6;LEMD3;CYR61;FBN1
epithelial cell migration (GO:0010631)	1965-10-01	0.157796	0.781076	0.731402	-0.180717	FERMT1;SCARB1;NR4A1;GPX1;ID1;CYP1B1;MYH9;ROBO1;LOXL2;PPARD
DNA geometric change (GO:0032392)	1957-09-01	0.158265	0.781076	0.957295	-0.236531	SETX;PIF1;HELB;BLM;DDX12P;NBN;CHD1L;RAD54B;MCM2
synaptic vesicle transport (GO:0048489)	1957-09-01	0.158265	0.781076	0.965486	-0.238554	STX12;BLOC1S6;TOR1A;PCLO;SNAPIN;OPHN1;CACFD1;AP3B1;AP3B2
establishment of synaptic vesicle localization (GO:0097480)	1957-09-01	0.158265	0.781076	0.96932	-0.239502	STX12;BLOC1S6;TOR1A;PCLO;SNAPIN;OPHN1;CACFD1;AP3B1;AP3B2
dicarboxylic acid transport (GO:0006835)	1957-09-01	0.158265	0.781076	0.969718	-0.2396	SLC46A1;STXBP1;MYO6;SLC1A3;PSEN1;CLN8;SLC26A6;GLS;SLC19A2
regulation of monooxygenase activity (GO:0032768)	1949-08-01	0.157678	0.781076	1.11863	-0.276393	GCHFR;SCARB1;POR;GCH1;SPR;VDR;ATP2B4;CALM1
glutathione metabolic process (GO:0006749)	1949-08-01	0.157678	0.781076	1.15646	-0.28574	GSTM4;GSTK1;GCLC;GSTM1;GPX1;GSTA4;ETHE1;GSTT1
cell-substrate junction assembly (GO:0007044)	1941-07-01	0.1555	0.781076	1.46885	-0.362927	TESK2;ITGA6;ITGA5;SORBS1;PTPRK;FERMT2;PLEC
actin cytoskeleton reorganization (GO:0031532)	1941-07-01	0.1555	0.781076	1.51364	-0.373995	EPS8;PTPN1;MICALL2;MYH9;RICTOR;PARVA;PRKCZ
actin polymerization or depolymerization (GO:0008154)	1941-07-01	0.1555	0.781076	1.52983	-0.377993	VASP;DIAPH2;ABI1;MICALL2;MICAL3;CORO7;MSRB1
pyrimidine-containing compound biosynthetic process (GO:0072528)	1941-07-01	0.1555	0.781076	1.53624	-0.379577	PRPS1;DTYMK;TPK1;RP2;UPRT;DCK;DHODH
positive regulation of epithelial to mesenchymal transition (GO:0010718)	2016-05-26	0.157167	0.781076	3.0282	-0.748214	DAB2;BAMBI;ZNF703;GCNT2;SNAI1
positive regulation of epidermis development (GO:0045684)	2016-05-26	0.157167	0.781076	3.03993	-0.751113	MSX2;KRT17;VDR;NCOA3;PPARD
prostate gland epithelium morphogenesis (GO:0060740)	2016-05-26	0.157167	0.781076	3.12361	-0.771789	RARG;HOXB13;CD44;ESR2;NKX3-1
regulation of cardiac muscle hypertrophy (GO:0010611)	2016-05-26	0.157167	0.781076	3.18445	-0.786822	RGS2;EDN1;P2RX4;ADK;ATP2B4
establishment of spindle localization (GO:0051293)	2016-05-26	0.157167	0.781076	3.20436	-0.79174	GPSM2;ESPL1;NDE1;MYH9;CDK5RAP2
phosphatidylcholine acyl-chain remodeling (GO:0036151)	2016-05-26	0.157167	0.781076	3.36087	-0.830411	PLA2G16;PNPLA8;LPCAT3;LPCAT2;PLA2G4A
modulation by symbiont of host cellular process (GO:0044068)	2016-03-12	0.158385	0.781076	10.0671	-2.48741	BCL2L11;TNIP1;ITGAV
I-kappaB phosphorylation (GO:0007252)	2016-03-12	0.158385	0.781076	10.3936	-2.56807	PRDX4;ERC1;IKBKE
trophoblast giant cell differentiation (GO:0060707)	2016-03-12	0.158385	0.781076	10.6962	-2.64285	SNAI1;PRDM1;E2F7
regulation of DNA damage checkpoint (GO:2000001)	2016-03-12	0.158385	0.781076	10.9102	-2.69571	RINT1;CRY1;RPA2
extracellular fibril organization (GO:0043206)	2016-03-12	0.158385	0.781076	11.3252	-2.79826	CST3;COL5A1;B4GALT7
purine nucleobase biosynthetic process (GO:0009113)	2016-03-12	0.158385	0.781076	11.436	-2.82563	PRPS1;SHMT1;ADA
positive regulation of mitochondrial membrane permeability (GO:0035794)	2016-03-12	0.158385	0.781076	11.6114	-2.86896	BCL2L11;BNIP3;SLC9A1
interleukin-1-mediated signaling pathway (GO:0070498)	2016-03-12	0.158385	0.781076	11.6356	-2.87496	RPS6KA5;IRAK2;IL1R1
glycoprotein catabolic process (GO:0006516)	2016-03-12	0.158385	0.781076	11.6961	-2.8899	EDEM3;MANBA;NGLY1
vitamin D metabolic process (GO:0042359)	2016-03-12	0.158385	0.781076	11.743	-2.90148	CYP11A1;CYP2R1;LGMN
cellular copper ion homeostasis (GO:0006878)	2016-03-12	0.158385	0.781076	11.8868	-2.93702	MT2A;SLC31A2;ATOX1
pentose-phosphate shunt (GO:0006098)	2016-03-12	0.158385	0.781076	12.3131	-3.04234	RPIA;HIBADH;PGD
regulation of mitochondrial fission (GO:0090140)	2016-03-12	0.158385	0.781076	13.5317	-3.34346	BNIP3;DNM1L;DHODH
secretion by cell (GO:0032940)	50/415	0.158969	0.782815	-0.0718942	0.017604	STEAP3;SNAP23;SERPINE1;MIA3;ADM;PCSK5;USE1;LYST;CLU;GLS;CTGF;PCLO;PNP;TIMP1;EDN1;ANXA1;PDIA4;ARL4D;VAMP1;HAP1;EXOC2;VCL;CFD;NOTCH2;STX12;STXBP3;MAOA;STXBP1;THBS1;LMF1;BLOC1S6;SCIN;MYO6;CAMK2G;MYH10;ABCA1;ARFGEF1;SNAPIN;HSPA5;EGF;CEP152;EIF2AK3;MICAL3;TBX3;SELM;GNAS;PPT1;CALM1;SELT;MON1A
cellular response to biotic stimulus (GO:0071216)	18/132	0.159632	0.785233	0.148137	-0.0358158	ABCA1;SCARB1;HSPA5;WFS1;RIPK2;CTR9;SERPINE1;ATG10;EIF2AK3;NR1D1;CDC73;ICAM1;SLX4;IRAK2;CYP11A1;DDIT3;TXNIP;MYD88
neural crest cell development (GO:0014032)	2016-04-19	0.161093	0.785632	5.31967	-1.28346	EDN1;JAG1;SNAI2;HES1
positive regulation of histone acetylation (GO:0035066)	2016-04-19	0.161093	0.785632	5.33879	-1.28808	RPS6KA5;ARID5A;SNAI2;PPARGC1A
nucleotide transport (GO:0006862)	2016-04-19	0.161093	0.785632	5.67238	-1.36856	SLC35A1;SLC35B4;SLC35D1;SLC25A19
neuron maturation (GO:0042551)	2016-04-19	0.161093	0.785632	5.67276	-1.36865	NR4A2;CDKN1C;RND1;CLN5
establishment of mitotic spindle localization (GO:0040001)	2016-04-19	0.161093	0.785632	5.7092	-1.37744	GPSM2;ESPL1;NDE1;CDK5RAP2
cortical actin cytoskeleton organization (GO:0030866)	2016-04-19	0.161093	0.785632	5.87022	-1.41629	FMNL2;EPB41;EPB41L2;PRKCDBP
regulation of lipopolysaccharide-mediated signaling pathway (GO:0031664)	2016-04-19	0.161093	0.785632	5.89557	-1.42241	SIGIRR;TRIM5;PRDM1;TRIB1
glutamine family amino acid biosynthetic process (GO:0009084)	2016-04-19	0.161093	0.785632	6.15064	-1.48395	OAT;SLC1A3;ASL;GLS
response to lipopolysaccharide (GO:0032496)	29/228	0.162068	0.788695	0.0336362	-0.00798441	PTGER4;SCARB1;CEBPB;CNP;CTR9;SERPINE1;ADM;PTGS2;CDC73;ICAM1;DUSP10;CASP8;CYP11A1;IRAK2;CASP1;TIMP4;CCRN4L;ABCA1;EDN1;JUN;GCH1;RIPK2;FOS;NR1D1;TJP1;PELI1;TRIB1;MYD88;PTGES
regulation of protein modification by small protein conjugation or removal (GO:1903320)	29/228	0.162068	0.788695	0.0605781	-0.0143798	WDR48;UBE2D1;PSEN1;ADRB2;CLU;PSMD8;RASSF1;FBXO4;BTRC;TRIM21;SOX4;SKP1;FANCI;RWDD3;HSPA5;WFS1;EGF;RIPK2;ARRDC3;COMMD1;PIAS1;PDCL3;GCLC;TBC1D7;CRY1;PELI1;ANAPC4;ANAPC5;BIRC3
branching morphogenesis of an epithelial tube (GO:0048754)	19/141	0.162561	0.790249	0.184435	-0.0434174	EDN1;CLIC4;MSX2;EGF;VDR;NCOA3;SIX1;CXCR4;TBX3;PGF;LRP6;DLL4;HHEX;PITX2;BTRC;HOXA5;CD44;EPHA2;NKX3-1
positive regulation of bone mineralization (GO:0030501)	1934-06-01	0.164387	0.791523	2.22133	-0.519339	OSR2;BMPR2;ASXL2;MIA3;ADRB2;CD276
positive regulation of T cell mediated immunity (GO:0002711)	1934-06-01	0.164387	0.791523	2.25787	-0.527883	HLA-H;HLA-C;HLA-A;MR1;PRKCZ;HLA-E
embryonic forelimb morphogenesis (GO:0035115)	1934-06-01	0.164387	0.791523	2.28622	-0.53451	OSR2;MSX2;KIAA1715;HOXD9;TBX3;LRP6
negative regulation of leukocyte mediated immunity (GO:0002704)	1934-06-01	0.164387	0.791523	2.30869	-0.539763	RABGEF1;BCL6;HMOX1;PTPN6;HLA-A;HLA-E
negative regulation of reproductive process (GO:2000242)	1934-06-01	0.164387	0.791523	2.34092	-0.547299	PRDX4;APC;SNAI1;TIMP1;ADA;NKX3-1
negative regulation of mitotic sister chromatid segregation (GO:0033048)	1934-06-01	0.164387	0.791523	2.37549	-0.555381	APC;UBE2D1;ANAPC4;ANAPC5;TERF1;MAD1L1
negative regulation of mitotic sister chromatid separation (GO:2000816)	1934-06-01	0.164387	0.791523	2.3938	-0.559661	APC;UBE2D1;ANAPC4;ANAPC5;TERF1;MAD1L1
negative regulation of sister chromatid segregation (GO:0033046)	1934-06-01	0.164387	0.791523	2.40515	-0.562317	APC;UBE2D1;ANAPC4;ANAPC5;TERF1;MAD1L1
negative regulation of mitotic metaphase/anaphase transition (GO:0045841)	1934-06-01	0.164387	0.791523	2.41028	-0.563514	APC;UBE2D1;ANAPC4;ANAPC5;TERF1;MAD1L1
regulation of cell cycle phase transition (GO:1901987)	33/264	0.165096	0.793442	0.0312182	-0.00722309	BLM;CDKN1A;UBE2D1;DBF4B;CDC73;AURKB;PSMD8;NBN;E2F7;SOX4;PLK3;USP47;CDKN2B;TIPIN;ANXA1;CRADD;PLK2;RPA2;HUS1;TERF1;ZWINT;CENPE;ESPL1;APC;TAOK3;MSH2;CHMP4C;ANAPC4;NABP1;ANAPC5;PTPN6;MAD1L1;RAD9A
anterior/posterior pattern specification (GO:0009952)	20/150	0.165134	0.793442	0.13369	-0.0309324	HES7;RARG;BMPR2;SEMA3C;MSX2;TULP3;PSEN1;PCSK5;LRP6;HHEX;IFT88;ARC;APC;KIF3A;ABI1;PLXNA2;ALX1;HOXD9;HOXA5;NKX3-1
glycerophospholipid metabolic process (GO:0006650)	29/229	0.167249	0.797892	0.0746525	-0.0168552	PI4K2B;PIGU;PGAP1;MTMR3;ABHD5;PIK3R1;AGPAT4;IMPA1;ACP6;INPP5J;BPNT1;PIP4K2C;SH3GLB1;DGAT1;PNPLA8;MBOAT1;PLA2G4A;SYNJ2;PLA2G15;PLA2G16;LPCAT3;ETNK1;PIGA;LPCAT2;PNPLA3;PIGM;LPIN3;SERINC5;PIGH
regulation of alpha-beta T cell differentiation (GO:0046637)	1942-07-01	0.167811	0.797892	1.59064	-0.359137	PNP;BCL6;RIPK2;NKAP;AP3B1;PRKCZ;ADA
positive regulation of cell killing (GO:0031343)	1942-07-01	0.167811	0.797892	1.63946	-0.370161	HLA-H;BCL2L11;CADM1;HLA-C;HLA-A;MR1;HLA-E
negative regulation of response to DNA damage stimulus (GO:2001021)	1942-07-01	0.167811	0.797892	1.66428	-0.375764	TMEM161A;RNF169;SNAI1;SNAI2;TAF9B;CLU;CD44
regulation of mitotic sister chromatid separation (GO:0010965)	1942-07-01	0.167811	0.797892	1.67241	-0.377601	ESPL1;APC;UBE2D1;ANAPC4;ANAPC5;TERF1;MAD1L1
negative regulation of DNA binding (GO:0043392)	1942-07-01	0.167811	0.797892	1.6787	-0.379021	JUN;MSX2;LHX2;ID1;HMOX1;NEK2;ZNF675
regulation of sister chromatid segregation (GO:0033045)	1942-07-01	0.167811	0.797892	1.69283	-0.382209	ESPL1;APC;UBE2D1;ANAPC4;ANAPC5;TERF1;MAD1L1
regulation of mitotic sister chromatid segregation (GO:0033047)	1942-07-01	0.167811	0.797892	1.69955	-0.383727	ESPL1;APC;UBE2D1;ANAPC4;ANAPC5;TERF1;MAD1L1
fatty acid derivative biosynthetic process (GO:1901570)	1942-07-01	0.167811	0.797892	1.70377	-0.38468	EDN1;EDN2;PNPLA8;PLA2G4A;LTA4H;PTGS2;PTGES
icosanoid biosynthetic process (GO:0046456)	1942-07-01	0.167811	0.797892	1.72201	-0.388799	EDN1;EDN2;PNPLA8;PLA2G4A;LTA4H;PTGS2;PTGES
cellular response to carbohydrate stimulus (GO:0071322)	1950-08-01	0.16898	0.799276	1.25979	-0.282255	TJP1;MLXIPL;UCP2;AACS;SOX4;SLC26A6;PCK2;ICAM1
regulation of cell killing (GO:0031341)	1950-08-01	0.16898	0.799276	1.28378	-0.287629	HLA-H;BCL2L11;CADM1;HLA-C;HLA-A;MR1;HLA-E;ICAM1
endothelial cell migration (GO:0043542)	1950-08-01	0.16898	0.799276	1.3039	-0.292136	NR4A1;SCARB1;GPX1;ID1;CYP1B1;MYH9;LOXL2;ROBO1
response to fatty acid (GO:0070542)	1950-08-01	0.16898	0.799276	1.31318	-0.294216	TGFBR3;UCP2;GNAS;PDK4;PTGS2;PPARGC1A;AACS;CTGF
hexose biosynthetic process (GO:0019319)	1950-08-01	0.16898	0.799276	1.35393	-0.303347	G6PC3;PMM1;GOT1;CRY1;ALDOC;PPARGC1A;ATF3;PCK2
positive regulation of I-kappaB kinase/NF-kappaB signaling (GO:0043123)	22/168	0.169387	0.800373	0.201718	-0.044918	RIPK2;SLC20A1;PLK2;ZDHHC13;NOD1;ZC3HAV1;PTGS2;ZDHHC17;CASP8;CASP10;TRIM5;CTH;PELI1;CASP1;HMOX1;S100A4;TRIM38;PIM2;IKBKE;MYD88;WLS;BIRC3
cellular biogenic amine metabolic process (GO:0006576)	17/125	0.17036	0.803302	0.312284	-0.0683976	GOT1;PNPLA8;MAOA;MBOAT1;PLA2G4A;SGMS2;SAT1;PLA2G15;PLA2G16;SPTLC2;ADI1;SMPD1;LPCAT3;LPCAT2;SMPDL3A;ALDH7A1;LPIN3
cellular amine metabolic process (GO:0044106)	17/125	0.17036	0.803302	0.314915	-0.068974	GOT1;MAOA;PNPLA8;MBOAT1;PLA2G4A;SGMS2;SAT1;PLA2G15;PLA2G16;SPTLC2;ADI1;SMPD1;LPCAT3;LPCAT2;SMPDL3A;ALDH7A1;LPIN3
positive regulation of Ras GTPase activity (GO:0032320)	36/292	0.1711	0.805956	0.0401889	-0.00866978	USP6NL;ARHGEF28;ICAM1;RCBTB2;RABGEF1;ALS2CL;OPHN1;EPS8L1;SH3BGRL3;TBC1D12;SBF2;TBC1D10A;TBC1D15;VAV3;BCAS3;JUN;RABGAP1L;RALGAPA1;ARHGEF17;CEP152;ARHGAP29;TBC1D2B;ARHGAP27;ARAP1;GMIP;ARHGAP24;NET1;SPATA13;TBC1D7;ARHGEF3;GNAS;CDC42EP2;RGL3;SERGEF;ARHGEF5;EPHA2
negative regulation of growth (GO:0045926)	28/221	0.171662	0.806259	0.153865	-0.033135	CDKN1A;BMPR2;BTG1;NPR1;MT1X;ADRB2;ADIPOR2;SAV1;MT2A;CCDC85B;APBB2;TSPYL2;BBS2;TCF7L2;ANKRD26;CDKN2C;TNK1;OSGIN1;SEMA4F;SMARCA2;ESR2;BCL6;GNAS;PPT1;MYD88;LGMN;PPARD;MT1E
regulation of transmembrane receptor protein serine/threonine kinase signaling pathway (GO:0090092)	24/186	0.172675	0.806259	0.174758	-0.0376343	FZD1;CDKN1C;NOTCH2;TCF7L2;CDKN2B;BMPR2;HSPA5;PARP1;MSX2;SMAD6;LEMD3;THBS1;GLG1;CYR61;VASN;BMP5;TGFBR3;DAB2;TWSG1;BAMBI;ZNF703;HES1;SNX6;FBN1
negative regulation of lipid transport (GO:0032369)	2016-05-27	0.172934	0.806259	3.40367	-0.732983	EGF;CRY1;ITGAV;THBS1;SREBF2
regulation of myoblast differentiation (GO:0045661)	2016-05-27	0.172934	0.806259	3.45839	-0.744765	BTG1;DDIT3;IGFBP3;ID3;TBX3
regulation of muscle hypertrophy (GO:0014743)	2016-05-27	0.172934	0.806259	3.46812	-0.746861	RGS2;EDN1;P2RX4;ATP2B4;ADK
cardiac chamber morphogenesis (GO:0003206)	2016-05-27	0.172934	0.806259	3.5421	-0.762792	DLL4;MESP1;JAG1;SEMA3C;SOX4
response to gonadotropin (GO:0034698)	2016-05-27	0.172934	0.806259	3.56399	-0.767507	TGFBR3;POR;HMGCS1;CYP11A1;ICAM1
phosphatidylserine metabolic process (GO:0006658)	2016-05-27	0.172934	0.806259	3.74089	-0.805602	PLA2G16;LPCAT3;MBOAT1;PLA2G4A;SERINC5
NADP metabolic process (GO:0006739)	2016-05-27	0.172934	0.806259	3.87181	-0.833796	RPIA;HIBADH;DCXR;FDXR;PGD
endosome organization (GO:0007032)	2016-05-27	0.172934	0.806259	3.97136	-0.855234	FAM160A2;RAB5B;ALS2CL;AKTIP;FAM109A
amine metabolic process (GO:0009308)	18/134	0.173366	0.807447	0.304915	-0.0652144	GOT1;PNPLA8;MAOA;MBOAT1;PLA2G4A;SGMS2;SAT1;PLA2G15;SULT1A1;PLA2G16;SPTLC2;ADI1;SMPD1;LPCAT3;LPCAT2;ALDH7A1;SMPDL3A;LPIN3
cell junction assembly (GO:0034329)	21/160	0.173752	0.808419	0.237296	-0.0504669	VASP;CADM1;FBF1;TESK2;PARVA;SORBS1;PTPRK;F11R;MPP5;TJP1;APC;ZNF703;CLDN12;MICALL2;CDH24;ITGA6;RSU1;ITGA5;FERMT2;VCL;PLEC
aging (GO:0007568)	26/204	0.175202	0.809374	0.18437	-0.038993	CDKN1C;CDKN1A;SPEF2;CNP;SERPINE1;ADM;HMGCR;BRCA2;AURKB;ICAM1;CTGF;LOXL2;UCP2;TIMP1;CTSC;POLG;EDN1;CDKN2B;JUN;GPX1;FOS;TBX3;CAT;ULK3;ALDOC;ADA
regulation of microtubule cytoskeleton organization (GO:0070507)	14/100	0.174225	0.809374	0.513242	-0.108547	PLK2;SPICE1;TERF1;MID1;NUBP1;AURKB;RGS2;SPAST;APC;INPP5J;CEP250;NEK2;CDK5RAP2;CLASP2
response to vitamin (GO:0033273)	1975-11-01	0.175122	0.809374	0.807776	-0.17084	GPX1;HMGCS1;VDR;CYP11A1;OGG1;CAT;PTGS2;PITX2;ADA;LRP6;PPARD
regulation of JUN kinase activity (GO:0043506)	1975-11-01	0.175122	0.809374	0.830825	-0.175714	DAB2;EDN1;MAP3K1;DUSP10;MDFIC;TAOK3;GAB1;DUSP19;MAP3K6;ZNF675;MAP3K4
nuclear import (GO:0051170)	1975-11-01	0.175122	0.809374	0.844664	-0.178641	IPO13;RERE;TCF7L2;JUN;EGF;RANBP17;LMNA;TXNIP;HES1;CBLB;PIK3R1
wound healing (GO:0042060)	1975-11-01	0.175122	0.809374	0.85627	-0.181096	SCARB1;MAP3K1;FUT10;SDC2;HMOX1;TGFA;MIA3;PLAT;TIMP1;CD44;PPARD
muscle cell development (GO:0055001)	1975-11-01	0.175122	0.809374	0.863134	-0.182548	BIN3;GPX1;HOMER1;LMNA;ADM;HES1;SMYD3;KIAA1161;PITX2;MYH10;TBX3
response to fibroblast growth factor (GO:0071774)	24/187	0.178653	0.809413	0.212854	-0.0450071	CDKN1A;EGF;GAB1;ITPR2;PIK3R1;FOXO3;SHCBP1;FOXO1;CTGF;DLL4;NR4A1;DSTYK;KITLG;AGO3;CYP11A1;NRG4;AGO1;SNAI2;THEM4;RICTOR;CALM1;CD44;HBEGF;TNRC6B
transmembrane receptor protein serine/threonine kinase signaling pathway (GO:0007178)	25/196	0.179886	0.809413	0.222941	-0.04714	BMPR2;SERPINE1;UBE2D1;PTPRK;F11R;PRKCZ;GCNT2;JUN;CDKN2B;MAP3K1;PARP1;MSX2;GDF15;FOS;SMAD6;DUSP22;TGFBR3;TWSG1;ZFYVE16;RBL1;TFDP2;BAMBI;ID1;TAB1;FERMT2
response to organophosphorus (GO:0046683)	16/118	0.181989	0.809413	0.456345	-0.0964922	JUN;IGFBP5;AKR1C1;BCKDHB;ITPR2;PLAT;FOS;PTGS2;PANX1;FOSL1;P2RX4;CYP11A1;NDUFS4;CASP1;FOSB;SLC26A6
stem cell maintenance (GO:0019827)	15/109	0.178411	0.809413	0.479691	-0.101428	NOTCH2;TCF7L2;TFAP2C;JAG1;CTR9;NKAP;TBX3;CDC73;MED24;APC;MED30;MED21;HES1;SOX4;PHF19
iron ion homeostasis (GO:0055072)	13/92	0.177846	0.809413	0.606442	-0.12823	STEAP3;SLC46A1;ABCB7;MFI2;SLC11A2;TCIRG1;MCOLN1;NUBP1;ATP6V1B2;HMOX1;SFXN5;HMOX2;MON1A
limb morphogenesis (GO:0035108)	14/101	0.182496	0.809413	0.628559	-0.132906	NOTCH2;OSR2;RARG;MSX2;WDR19;PSEN1;PCSK5;TBX3;LRP6;GNAS;ALX1;PITX2;HOXD9;KIAA1715
appendage morphogenesis (GO:0035107)	14/101	0.182496	0.809413	0.631409	-0.133509	NOTCH2;OSR2;RARG;MSX2;WDR19;PSEN1;PCSK5;TBX3;LRP6;GNAS;ALX1;PITX2;HOXD9;KIAA1715
protein import (GO:0017038)	14/101	0.182496	0.809413	0.648671	-0.137159	IPO13;RERE;TCF7L2;JUN;PEX19;EGF;RANBP17;CBLB;PIK3R1;CLU;LMNA;TXNIP;HES1;RAB8B
negative regulation of cytoskeleton organization (GO:0051494)	14/101	0.182496	0.809413	0.66595	-0.140812	ARFGEF1;ARAP1;MID1;NUBP1;AURKB;EPS8;LIMA1;SCIN;APC;INPP5J;NEK2;SPTAN1;CDK5RAP2;CLASP2
glycolipid metabolic process (GO:0006664)	13/92	0.177846	0.809413	0.66752	-0.141144	PIGU;PGAP1;HEXB;GBA;NAGA;SUMF1;NEU3;GM2A;SMPD1;PIGA;ARSJ;NEU1;PIGH
cellular response to mechanical stimulus (GO:0071260)	1967-10-01	0.177573	0.809413	0.994836	-0.210354	PTGER4;MAP3K1;CASP8;CRADD;GADD45A;BNIP3;IRF1;CASP1;PTGS2;MYD88
positive regulation of osteoblast differentiation (GO:0045669)	1959-09-01	0.179502	0.809413	1.16366	-0.246051	CEBPB;IFITM1;JAG1;BMPR2;MSX2;GNAS;PDLIM7;CYR61;CD276
cytosolic calcium ion transport (GO:0060401)	1943-07-01	0.180535	0.809413	1.81862	-0.38454	DDIT3;ATP2B4;MCOLN1;JPH1;TPCN2;ERO1L;CTGF
negative regulation of DNA replication (GO:0008156)	1943-07-01	0.180535	0.809413	1.85551	-0.39234	TSPYL2;PIF1;TIPIN;BLM;HUS1;BRCA2;TERF1
positive regulation of alpha-beta T cell differentiation (GO:0046638)	1935-06-01	0.178437	0.809413	2.31541	-0.489583	PNP;RIPK2;NKAP;AP3B1;PRKCZ;ADA
neural crest cell migration (GO:0001755)	1935-06-01	0.178437	0.809413	2.33646	-0.494035	EFNB1;KITLG;NRP2;SEMA3C;PITX2;PHACTR4
positive regulation of glucose transport (GO:0010828)	1935-06-01	0.178437	0.809413	2.4001	-0.507491	C2CD5;CREBL2;SORBS1;PIK3R1;ADIPOR2;PRKCZ
skin development (GO:0043588)	1935-06-01	0.178437	0.809413	2.48634	-0.525726	TCF7L2;WDR48;COL5A1;ARRDC3;GNAS;ITGA6
negative regulation of metaphase/anaphase transition of cell cycle (GO:1902100)	1935-06-01	0.178437	0.809413	2.51158	-0.531064	APC;UBE2D1;ANAPC4;ANAPC5;TERF1;MAD1L1
regulation of anoikis (GO:2000209)	2016-04-20	0.17998	0.809413	5.46251	-1.15502	BRMS1;PDK4;SNAI2;ITGA5
regulation of receptor biosynthetic process (GO:0010869)	2016-04-20	0.17998	0.809413	5.68801	-1.2027	EDN1;ITGAV;NR1D1;HOXA5
regulation of centrosome duplication (GO:0010824)	2016-04-20	0.17998	0.809413	5.8633	-1.23977	PLK2;SPICE1;NUBP1;CDK5RAP2
aspartate family amino acid biosynthetic process (GO:0009067)	2016-04-20	0.17998	0.809413	6.08737	-1.28715	GOT1;ASNSD1;ADI1;MTR
heme biosynthetic process (GO:0006783)	2016-04-20	0.17998	0.809413	6.10597	-1.29108	ALAD;ALAS1;SLC11A2;PPOX
cobalamin metabolic process (GO:0009235)	2016-04-20	0.17998	0.809413	6.16541	-1.30365	ABCD4;MMAA;MTR;CD320
regulation of chemokine biosynthetic process (GO:0045073)	2016-03-13	0.182215	0.809413	10.1283	-2.14159	SIGIRR;HMOX1;MYD88
branching involved in prostate gland morphogenesis (GO:0060442)	2016-03-13	0.182215	0.809413	10.2533	-2.16801	HOXB13;CD44;NKX3-1
phagocytosis, engulfment (GO:0006911)	2016-03-13	0.182215	0.809413	10.6198	-2.24552	ABCA1;MFGE8;THBS1
negative regulation of DNA damage response, signal transduction by p53 class mediator (GO:0043518)	2016-03-13	0.182215	0.809413	10.7037	-2.26324	SNAI1;SNAI2;CD44
vascular smooth muscle contraction (GO:0014829)	2016-03-13	0.182215	0.809413	11.0672	-2.3401	BBS2;EDN1;EDN2
positive regulation of fatty acid biosynthetic process (GO:0045723)	2016-03-13	0.182215	0.809413	11.1295	-2.35328	MLXIPL;ANXA1;PTGS2
negative regulation of systemic arterial blood pressure (GO:0003085)	2016-03-13	0.182215	0.809413	11.1884	-2.36573	BMPR2;PRCP;ADRB2
inner cell mass cell proliferation (GO:0001833)	2016-03-13	0.182215	0.809413	11.1963	-2.36741	TAF8;BRCA2;ZPR1
atrial septum morphogenesis (GO:0060413)	2016-03-13	0.182215	0.809413	11.2054	-2.36934	NOTCH2;CYR61;SOX4
negative regulation of macrophage derived foam cell differentiation (GO:0010745)	2016-03-13	0.182215	0.809413	11.4613	-2.42343	ABCA1;ABCA5;ITGAV
positive regulation of DNA-dependent DNA replication (GO:2000105)	2016-03-13	0.182215	0.809413	11.7243	-2.47905	DBF4B;E2F7;BMP5
negative regulation of JUN kinase activity (GO:0043508)	2016-03-13	0.182215	0.809413	11.7684	-2.48837	DUSP10;DUSP19;ZNF675
regulation of amyloid precursor protein catabolic process (GO:1902991)	2016-03-13	0.182215	0.809413	11.8117	-2.49753	OLFM1;HAP1;CLU
negative regulation of receptor activity (GO:2000272)	2016-03-13	0.182215	0.809413	11.9976	-2.53685	PSEN1;PPARGC1A;SNX6
NADPH regeneration (GO:0006740)	2016-03-13	0.182215	0.809413	12.4412	-2.63065	RPIA;HIBADH;PGD
Golgi to endosome transport (GO:0006895)	2016-03-13	0.182215	0.809413	12.6814	-2.68142	MON2;CORO7;KLHL20
regulation of Ras GTPase activity (GO:0032318)	42/349	0.185009	0.817587	0.182488	-0.0367526	USP6NL;FICD;ARHGEF28;RCBTB2;ICAM1;RABGEF1;ALS2CL;OPHN1;EPS8L1;RICTOR;SH3BGRL3;TBC1D12;SBF2;TBC1D15;AGFG2;TBC1D10A;VAV3;ARFGEF1;BCAS3;RABGAP1L;JUN;RALGAPA1;ARHGEF17;CEP152;ARHGAP29;TBC1D2B;ARAP1;ARHGAP27;GMIP;ARHGAP24;NET1;ACAP2;BCL6;SPATA13;TBC1D7;ARHGEF3;CDC42EP2;GNAS;RGL3;SERGEF;ARHGEF5;EPHA2
tissue morphogenesis (GO:0048729)	43/358	0.184788	0.817587	0.265487	-0.0534684	NOTCH2;MESP1;RARG;CLIC4;SEMA3C;GCNT1;CXCR4;SIX1;ADM;PSEN1;HOXB13;LRP6;DLL4;HHEX;ARL13B;HES1;BBS7;BTRC;PITX2;HOXA5;PHACTR4;NKX3-1;STIL;TFAP2C;EDN1;JAG1;MSX2;EGF;VDR;NCOA3;MPP5;PGF;ESR2;TBX3;TGFBR3;ALDH1A3;KRT17;SNAI1;SNAI2;LGR4;CD44;VCL;EPHA2
regulation of neuron apoptotic process (GO:0043523)	24/188	0.184739	0.817587	0.281945	-0.0567831	SRPK2;JUN;EGLN3;CEBPB;GPX1;WFS1;STXBP1;SIX1;PSEN1;FOXO3;OXR1;NR4A2;GCLC;BCL2L11;MSH2;DDIT3;TRIM2;PPT1;HMOX1;PPARGC1A;NES;LGMN;ZPR1;CPEB4
response to ionizing radiation (GO:0010212)	17/127	0.185057	0.817587	0.504303	-0.101565	CDKN1A;BLM;PRKAA1;GPX1;ANXA1;GADD45A;HUS1;BRCA2;INIP;ICAM1;NET1;MSH2;CYP11A1;NABP1;TMEM109;SNAI2;RAD9A
response to light stimulus (GO:0009416)	39/322	0.185453	0.818545	0.206051	-0.041257	CDKN1A;PRKAA1;TMEM161A;SDC4;SDC2;XPA;RBM4B;LPL;SLC1A3;HMGCR;PIK3R1;PTPRK;BRCA2;PTGS2;UACA;CRIP1;AURKB;HRH1;MAP3K4;USP47;TIPIN;GPX1;HMGCS1;ELOVL4;RHBDD1;ACTR5;AKR1C1;HUS1;FOS;GTF2H2;USF1;PER1;KIAA0101;MSH2;CAT;CRY1;NMT2;UNC119;CALM1
positive regulation of MAP kinase activity (GO:0043406)	25/197	0.185853	0.818724	0.342115	-0.0684259	PRKAA1;CHRNA7;DUSP19;CXCR4;TGFA;NOD1;MST1R;PSEN1;THBS1;IRAK2;S1PR2;MAP3K6;MAP3K4;MAP2K3;EDN1;MAP3K1;EGF;RIPK2;GAB1;DAB2;KITLG;TAOK3;MDFIC;CSPG4;TAB1
regulation of vasculature development (GO:1901342)	25/197	0.185853	0.818724	0.342265	-0.068456	BTG1;NPR1;CHRNA7;SERPINE1;HSPB1;ADM;PTGS2;TSPAN12;THBS1;ETS1;DLL4;HHEX;HMOX1;CYP1B1;HOXA5;TNFRSF12A;ERAP1;VASH2;EMP2;PGF;RUNX1;PDCL3;ID1;ANGPTL4;EPHA2
cellular response to inorganic substance (GO:0071241)	15/110	0.186434	0.819697	0.573648	-0.114053	JUN;BLM;CLIC4;OGG1;BNIP3;SLC11A2;MT1X;FOS;FOXO1;MT2A;CYP11A1;HMOX1;FOSB;PPARGC1A;MT1E
ribonucleoside biosynthetic process (GO:0042455)	15/110	0.186434	0.819697	0.619164	-0.123102	PRPS2;SLC26A2;ACOT7;PANK3;AK1;ADK;PAPSS2;DHODH;PAPSS1;QTRT1;IMPDH1;RP2;UPRT;ADSS;ADA
morphogenesis of a branching epithelium (GO:0061138)	21/162	0.186838	0.819892	0.391917	-0.0778279	EDN1;CLIC4;MSX2;EGF;VDR;NCOA3;SIX1;CXCR4;ADM;HOXB13;TBX3;PGF;LRP6;DLL4;HHEX;PITX2;BTRC;HOXA5;CD44;EPHA2;NKX3-1
glycosaminoglycan metabolic process (GO:0030203)	21/162	0.186838	0.819892	0.402985	-0.0800258	ITIH4;SLC26A2;SDC4;SLC35D1;SDC2;HEXB;ABCC5;FUCA1;MAMDC2;GNS;PAPSS2;SLC9A1;PAPSS1;EXT1;GCNT2;IDS;CSPG4;B4GALT7;ST3GAL1;B4GALT4;CD44
negative regulation of response to external stimulus (GO:0032102)	27/215	0.18762	0.820804	0.282912	-0.0558667	PTGER4;CHRNA7;C5AR2;GBA;SERPINE1;PLAT;HMGCR;PRDM1;UACA;ROBO1;RABGEF1;DUSP10;UBASH3B;MICB;CD276;BBS2;EDN1;GPX1;ANXA1;PLAUR;SIGIRR;PPM1B;SNAI2;TRIM38;TRIB1;ADA;PPARD
embryonic organ development (GO:0048568)	16/119	0.189782	0.820804	0.571496	-0.112854	RARG;STIL;CEBPB;WDR48;EPAS1;WDR19;TULP3;PCSK5;CYR61;RUNX1;KITLG;ID3;HES1;PITX2;NES;ADA
nucleoside biosynthetic process (GO:0009163)	16/119	0.189782	0.820804	0.59123	-0.11675	PRPS2;SLC26A2;ACOT7;PANK3;AK1;ADK;DCK;PAPSS2;DHODH;PAPSS1;QTRT1;IMPDH1;RP2;UPRT;ADSS;ADA
positive regulation of leukocyte proliferation (GO:0070665)	16/119	0.189782	0.820804	0.60176	-0.11883	VAV3;CDKN1A;BLM;RIPK2;ADK;EFNB1;KITLG;PNP;BCL6;SELK;PELI1;TNFSF9;HES1;ADA;MYD88;CD276
cellular response to light stimulus (GO:0071482)	1985-12-01	0.19065	0.820804	0.929823	-0.183613	USP47;TMEM161A;RHBDD1;ACTR5;CRY1;NMT2;PIK3R1;PTPRK;PTGS2;CALM1;CRIP1;AURKB
female pregnancy (GO:0007565)	1985-12-01	0.19065	0.820804	0.959249	-0.189423	FOSL1;UCP2;GNAS;FOSB;UPRT;LNPEP;ADM;FOS;ETS1;ADIPOR2;PGF;DHODH
glycosaminoglycan catabolic process (GO:0006027)	1960-09-01	0.190578	0.820804	1.38679	-0.273849	SDC4;SDC2;HEXB;FUCA1;IDS;CSPG4;GNS;CD44;SLC9A1
thioester metabolic process (GO:0035383)	1960-09-01	0.190578	0.820804	1.43066	-0.282514	ACSS2;ACOT7;DGAT1;ELOVL4;TECR;PMVK;ACOT1;ELOVL7;PDHB
acyl-CoA metabolic process (GO:0006637)	1960-09-01	0.190578	0.820804	1.43349	-0.283071	ACSS2;ACOT7;DGAT1;ELOVL4;TECR;PMVK;ACOT1;PDHB;ELOVL7
stem cell development (GO:0048864)	2016-05-28	0.189276	0.820804	3.63413	-0.717634	EDN1;JAG1;SNAI2;ALX1;HES1
regulation of glycoprotein biosynthetic process (GO:0010559)	2016-05-28	0.189276	0.820804	3.70714	-0.73205	ACER2;ARFGEF1;TCF7L2;AATF;HBEGF
glucan biosynthetic process (GO:0009250)	2016-05-28	0.189276	0.820804	3.76797	-0.744063	PPP1R3C;PGM2;NR1D1;GYG1;PGM2L1
glycogen biosynthetic process (GO:0005978)	2016-05-28	0.189276	0.820804	3.78007	-0.746453	PPP1R3C;PGM2;NR1D1;GYG1;PGM2L1
regulation of DNA damage response, signal transduction by p53 class mediator (GO:0043516)	2016-05-28	0.189276	0.820804	3.78703	-0.747827	SMYD2;SNAI1;SNAI2;EEF1E1;CD44
positive regulation of fatty acid metabolic process (GO:0045923)	2016-05-28	0.189276	0.820804	3.8006	-0.750506	MLXIPL;ANXA1;PTGS2;PPARGC1A;PLIN5
negative regulation of cellular response to insulin stimulus (GO:1900077)	2016-05-28	0.189276	0.820804	3.814	-0.753153	PTPN1;PRKAA1;ANKRD26;SOCS1;PRKCZ
acylglycerol homeostasis (GO:0055090)	2016-05-28	0.189276	0.820804	3.85545	-0.761338	MLXIPL;SCARB1;LPL;FITM2;ANGPTL4
nucleotide-binding oligomerization domain containing signaling pathway (GO:0070423)	2016-05-28	0.189276	0.820804	3.86024	-0.762284	CASP8;RIPK2;IRAK2;NOD1;TAB1
triglyceride homeostasis (GO:0070328)	2016-05-28	0.189276	0.820804	3.88285	-0.766748	MLXIPL;SCARB1;LPL;FITM2;ANGPTL4
endoplasmic reticulum organization (GO:0007029)	2016-05-28	0.189276	0.820804	4.09328	-0.808302	RTN3;ATL2;EIF2AK3;TOR1B;USE1
response to nutrient (GO:0007584)	21/163	0.193564	0.821292	0.458236	-0.0902158	ABCA1;CDKN2B;GPX1;HMGCS1;VDR;OGG1;BCKDHB;HMGCR;PTGS2;ADIPOR2;USF1;AACS;GNAI2;LRP6;POR;CYP11A1;CAT;HMOX1;PITX2;ADA;PPARD
organic hydroxy compound transport (GO:0015850)	14/102	0.190953	0.821292	0.771052	-0.151802	ABCA1;SCARB1;STX12;PRKAB2;PGAP1;ABCA5;AKR1C1;PSEN1;CLU;SLC5A3;SLC9A3R1;SELM;SLC16A7;SLC26A6
regulation of epithelial to mesenchymal transition (GO:0010717)	1952-08-01	0.192633	0.821292	1.58908	-0.312852	TGFBR3;DAB2;BAMBI;ZNF703;SNAI1;GCNT2;VASN;BMP5
regulation of microtubule polymerization or depolymerization (GO:0031110)	1952-08-01	0.192633	0.821292	1.60854	-0.316684	RGS2;SPAST;APC;INPP5J;TERF1;MID1;AURKB;CLASP2
negative regulation of protein depolymerization (GO:1901880)	1952-08-01	0.192633	0.821292	1.68196	-0.331137	EPS8;LIMA1;SCIN;APC;SPTAN1;MID1;AURKB;CLASP2
positive regulation of tumor necrosis factor production (GO:0032760)	1944-07-01	0.193648	0.821292	1.96539	-0.386939	RIPK2;HSPB1;NOD1;PIK3R1;THBS1;CLU;MYD88
JAK-STAT cascade (GO:0007259)	1944-07-01	0.193648	0.821292	2.02906	-0.399473	IFNAR2;PTPN1;SOCS1;STAT2;CTR9;PTPN6;PIAS1
regulation of leukocyte mediated cytotoxicity (GO:0001910)	1944-07-01	0.193648	0.821292	2.03992	-0.401613	HLA-H;CADM1;HLA-C;HLA-A;MR1;ICAM1;HLA-E
segmentation (GO:0035282)	1944-07-01	0.193648	0.821292	2.06554	-0.406657	HES7;MAFB;SEMA3C;ABI1;PLXNA2;PSEN1;NKX3-1
regulation of signal transduction by p53 class mediator (GO:1901796)	1944-07-01	0.193648	0.821292	2.07731	-0.408974	STEAP3;SNAI1;SMYD2;SNAI2;TAF9B;EEF1E1;CD44
amide biosynthetic process (GO:0043604)	1944-07-01	0.193648	0.821292	2.1209	-0.417554	GCLC;ARG2;SPTLC2;ASNSD1;ASL;SGMS2;PCSK5
regulation of gluconeogenesis (GO:0006111)	1936-06-01	0.192949	0.821292	2.61012	-0.513871	TCF7L2;SLC35B4;SMEK1;NR1D1;PPARGC1A;FOXO1
positive regulation of biomineral tissue development (GO:0070169)	1936-06-01	0.192949	0.821292	2.61556	-0.514943	OSR2;BMPR2;ASXL2;MIA3;ADRB2;CD276
regulation of muscle adaptation (GO:0043502)	1936-06-01	0.192949	0.821292	2.65493	-0.522692	RGS2;EDN1;P2RX4;ADK;ATP2B4;CAMK2G
lamellipodium organization (GO:0097581)	1936-06-01	0.192949	0.821292	2.6848	-0.528573	VAV3;CCDC88A;ABLIM1;SPATA13;ABI1;VCL
mitotic spindle checkpoint (GO:0071174)	1936-06-01	0.192949	0.821292	2.68661	-0.52893	APC;UBE2D1;ANAPC4;ANAPC5;TERF1;MAD1L1
response to alkaloid (GO:0043279)	15/111	0.194629	0.823151	0.716594	-0.13946	EDN1;BLM;PRKAA1;GPX1;HOMER1;SDC2;CHRNA7;DHODH;ICAM1;CYP11A1;SMPD1;PEA15;FOSB;HMOX1;ADA
regulation of DNA binding (GO:0051101)	1977-11-01	0.194626	0.823151	1.08083	-0.210346	JUN;MSX2;PARP1;EGF;LHX2;ID1;HMOX1;NEK2;HES1;PITX2;ZNF675
regulation of oxidoreductase activity (GO:0051341)	1977-11-01	0.194626	0.823151	1.08354	-0.210873	GCHFR;SCARB1;EDN1;POR;EDN2;SPR;GCH1;VDR;ATP2B4;ABL2;CALM1
regulation of G-protein coupled receptor protein signaling pathway (GO:0008277)	18/137	0.195067	0.824238	0.569451	-0.110072	GPSM2;EDN1;RGS16;ARRDC3;ATP2B4;TULP3;SNX13;ADRB2;RGS2;RGS3;RGS10;PDCL;CRY1;NMT2;MYH9;RGS20;CALM1;ADA
regulation of multi-organism process (GO:0043900)	37/306	0.195336	0.824611	0.325765	-0.0628217	IFITM1;YTHDC2;PLAT;ZC3HAV1;PRDM1;DDX60;OASL;PRDX4;BCL2L11;TRIM5;ITGAV;TIMP1;TRIM21;MB21D1;MICB;SRPK2;APOBEC3C;JUN;RHBDD1;FUCA2;HLA-A;GTF2H2;SIGIRR;ISG20;PPM1B;MDFIC;TNIP1;SLPI;CHMP4C;TRIM14;TRIM59;TRIM15;TRIM38;TRIB1;MYD88;ADA;BIRC3
regulation of cell cycle process (GO:0010564)	56/481	0.203289	0.824706	0.389186	-0.0750071	CDKN1A;UBE2D1;CCP110;BRCA2;CDC73;NUBP1;CTGF;PSMD8;RASSF1;NEK2;NBN;SOX4;CDK5RAP2;USP47;EDN1;TIPIN;ANXA1;MSX2;SPICE1;HUS1;TERF1;CDC25C;CDC25B;RINT1;DYNC1LI1;ESPL1;MSH2;CHMP4C;CRY1;ANAPC4;ANAPC5;MAD1L1;L3MBTL1;BLM;TGFA;TXLNG;DBF4B;NDRG1;AURKB;E2F7;PLK3;CDKN2B;CRADD;EGF;PLK2;KLHL21;RPA2;ZWINT;CENPE;MLXIPL;TAOK3;APC;NABP1;PTPN6;CALM1;RAD9A
purine-containing compound biosynthetic process (GO:0072522)	19/146	0.197142	0.824706	0.491155	-0.0946595	PRPS2;PRPS1;SLC26A2;ACOT7;PANK3;NPR1;SHMT1;AK1;ADK;ADM;DCK;PAPSS2;PAPSS1;PNP;IMPDH1;RP2;GNAS;ADSS;ADA
regulation of binding (GO:0051098)	27/218	0.205405	0.824706	0.491642	-0.0947533	BLM;EPB41;PSEN1;ADRB2;AURKB;HMOX1;NEK2;HES1;PITX2;NKX3-1;TCF7L2;JUN;SNAPIN;PEX19;PARP1;MSX2;EGF;AKTIP;EIF2AK3;TGFBR3;DAB2;SLPI;LHX2;BAMBI;ID1;ZNF675;NES
regulation of epithelial cell migration (GO:0010632)	17/129	0.200359	0.824706	0.612744	-0.118093	SCARB1;BCAS3;EDN1;NRP2;BMPR2;HSPB1;EMP2;PRCP;PTGS2;ETS1;THBS1;PTPRG;TGFBR3;DLL4;SH3BGRL3;EPHA2;HBEGF
negative regulation of defense response (GO:0031348)	16/120	0.197733	0.824706	0.627183	-0.120876	PTGER4;ANXA1;GPX1;CHRNA7;GBA;HLA-A;UACA;HLA-E;RABGEF1;PPM1B;DUSP10;TRIM38;ADA;MICB;CD276;PPARD
glycosyl compound biosynthetic process (GO:1901659)	16/120	0.197733	0.824706	0.664386	-0.128046	PRPS2;SLC26A2;ACOT7;PANK3;AK1;ADK;DCK;PAPSS2;DHODH;PAPSS1;QTRT1;IMPDH1;RP2;UPRT;ADSS;ADA
regulation of transforming growth factor beta receptor signaling pathway (GO:0017015)	14/103	0.199593	0.824706	0.869292	-0.167537	CDKN1C;CDKN2B;HSPA5;SMAD6;LEMD3;THBS1;GLG1;VASN;TGFBR3;DAB2;BAMBI;ZNF703;SNX6;FBN1
hemopoiesis (GO:0030097)	13/95	0.204664	0.824706	0.964456	-0.185878	L3MBTL1;NOTCH2;JAG1;FUT10;ZNF160;RTKN2;BRCA2;RUNX1;TGFBR3;MYO1E;KITLG;TWSG1;EBP
palate development (GO:0060021)	1978-11-01	0.204727	0.824706	1.15453	-0.222511	TGFBR3;OSR2;IFT88;INSIG1;SNAI1;SNAI2;ARID5B;ALX1;BBS7;TBX3;LRP6
axis specification (GO:0009798)	1978-11-01	0.204727	0.824706	1.18649	-0.228671	STIL;PGAP1;APC;ARL13B;SMAD6;PITX2;VAX2;TBX3;RNF2;WLS;LRP6
negative regulation of cysteine-type endopeptidase activity involved in apoptotic process (GO:0043154)	1969-10-01	0.198432	0.824706	1.25049	-0.241005	USP47;NR4A1;POR;TNFAIP8;GPX1;MKL1;IFI6;THBS1;SH3RF1;CD44
adherens junction organization (GO:0034332)	1969-10-01	0.198432	0.824706	1.29179	-0.248965	CADM1;ZNF703;NUMB;CDH24;TESK2;SORBS1;PTPRK;FERMT2;VCL;RAB8B
positive regulation of JUN kinase activity (GO:0043507)	1961-09-01	0.201941	0.824706	1.48222	-0.285665	DAB2;EDN1;MAP3K1;MDFIC;TAOK3;GAB1;DUSP19;MAP3K6;MAP3K4
glycosphingolipid metabolic process (GO:0006687)	1961-09-01	0.201941	0.824706	1.55542	-0.299774	NEU3;GM2A;SMPD1;ARSJ;HEXB;NEU1;GBA;NAGA;SUMF1
regulation of epidermis development (GO:0045682)	1953-08-01	0.20495	0.824706	1.7065	-0.328891	TFAP2C;MSX2;KRT17;VDR;NCOA3;MAFF;HES1;PPARD
regulation of protein tyrosine kinase activity (GO:0061097)	1953-08-01	0.20495	0.824706	1.71787	-0.331082	RAP2B;EGF;DOK7;ABI1;TGFA;UNC119;PSEN1;SNX6
pyridine nucleotide metabolic process (GO:0019362)	1953-08-01	0.20495	0.824706	1.8264	-0.351999	RPIA;PNP;HIBADH;DCXR;FDXR;NMNAT3;PGD;PCK2
nicotinamide nucleotide metabolic process (GO:0046496)	1953-08-01	0.20495	0.824706	1.8352	-0.353695	RPIA;PNP;HIBADH;DCXR;FDXR;NMNAT3;PGD;PCK2
regulation of blood vessel endothelial cell migration (GO:0043535)	1945-07-01	0.207127	0.824706	2.18429	-0.420974	DLL4;HSPB1;SH3BGRL3;PRCP;PTGS2;THBS1;EPHA2
regulation of extrinsic apoptotic signaling pathway via death domain receptors (GO:1902041)	1945-07-01	0.207127	0.824706	2.24609	-0.432885	GPX1;SERPINE1;PEA15;HMOX1;THBS1;ICAM1;BMP5
neuromuscular process controlling balance (GO:0050885)	1945-07-01	0.207127	0.824706	2.25554	-0.434706	ALDH1A3;GM2A;HEXB;SLC1A3;NBN;CLN8;MYH10
actin filament bundle assembly (GO:0051017)	1945-07-01	0.207127	0.824706	2.26661	-0.436839	EPS8;LIMA1;FSCN1;ABL2;NEDD9;SHROOM1;SORBS1
actin filament bundle organization (GO:0061572)	1945-07-01	0.207127	0.824706	2.27605	-0.438659	EPS8;LIMA1;FSCN1;ABL2;NEDD9;SHROOM1;SORBS1
cellular response to ketone (GO:1901655)	2016-05-29	0.206141	0.824706	3.89383	-0.750451	GNAS;SMYD3;FBXO32;DCPS;AACS
smooth muscle cell differentiation (GO:0051145)	2016-05-29	0.206141	0.824706	4.1515	-0.800112	MESP1;MKL1;SIX1;PITX2;SMARCA2
fatty-acyl-CoA metabolic process (GO:0035337)	2016-05-29	0.206141	0.824706	4.18157	-0.805907	ACOT7;DGAT1;ELOVL4;TECR;ELOVL7
lung epithelial cell differentiation (GO:0060487)	2016-05-29	0.206141	0.824706	4.20421	-0.810271	GPSM2;NUMB;KLF2;HOXA5;SAV1
microtubule anchoring (GO:0034453)	2016-05-29	0.206141	0.824706	4.23231	-0.815686	CASC5;FOPNL;GCC2;AURKB;CLASP2
positive regulation of monooxygenase activity (GO:0032770)	2016-04-21	0.199555	0.824706	5.90316	-1.13771	SCARB1;POR;GCH1;CALM1
regulation of alpha-beta T cell proliferation (GO:0046640)	2016-04-21	0.199555	0.824706	6.08058	-1.1719	BLM;RIPK2;IRF1;CBLB
positive regulation of protein complex disassembly (GO:0043243)	2016-04-21	0.199555	0.824706	6.14712	-1.18472	SPAST;BNIP3;EIF5A2;NES
nucleus localization (GO:0051647)	2016-04-21	0.199555	0.824706	6.18409	-1.19185	HHEX;CEP120;MYH10;SYNE2
negative regulation of steroid biosynthetic process (GO:0010894)	2016-04-21	0.199555	0.824706	6.25838	-1.20617	INSIG1;SNAI1;SNAI2;BMP5
embryonic eye morphogenesis (GO:0048048)	2016-04-21	0.199555	0.824706	6.30372	-1.2149	ALDH1A3;RARG;VAX2;LRP6
membrane protein ectodomain proteolysis (GO:0006509)	2016-04-21	0.199555	0.824706	6.35544	-1.22487	ERAP1;SPPL2A;MYH9;PSEN1
sulfur amino acid biosynthetic process (GO:0000097)	2016-04-21	0.199555	0.824706	6.39436	-1.23238	GOT1;ADI1;CTH;MTR
estrogen metabolic process (GO:0008210)	2016-04-21	0.199555	0.824706	6.49004	-1.25081	SULT1A1;CYP11A1;CYP1B1;HSD17B7
cortical cytoskeleton organization (GO:0030865)	2016-04-21	0.199555	0.824706	6.5225	-1.25707	FMNL2;EPB41;EPB41L2;PRKCDBP
regulation of respiratory gaseous exchange (GO:0043576)	2016-04-21	0.199555	0.824706	6.67058	-1.28561	NR4A2;TLX3;SLC5A3;GLS
protein ADP-ribosylation (GO:0006471)	2016-04-21	0.199555	0.824706	6.68634	-1.28865	PARP1;SIRT5;PARP16;ART5
modified amino acid transport (GO:0072337)	2016-04-21	0.199555	0.824706	6.83578	-1.31745	SLC25A26;SLC9A3R1;SLC46A1;SLC19A2
negative regulation of myoblast differentiation (GO:0045662)	2016-03-14	0.206913	0.824706	10.6039	-2.04366	DDIT3;ID3;TBX3
positive regulation of nitric-oxide synthase activity (GO:0051000)	2016-03-14	0.206913	0.824706	10.892	-2.0992	SCARB1;GCH1;CALM1
positive regulation of steroid biosynthetic process (GO:0010893)	2016-03-14	0.206913	0.824706	10.9406	-2.10857	POR;PRKAA1;NR1D1
regulation of fibrinolysis (GO:0051917)	2016-03-14	0.206913	0.824706	10.9556	-2.11145	SERPINE1;THBS1;USF1
hyaluronan catabolic process (GO:0030214)	2016-03-14	0.206913	0.824706	10.9976	-2.11955	HEXB;CD44;SLC9A1
ectodermal placode formation (GO:0060788)	2016-03-14	0.206913	0.824706	11.1429	-2.14755	GNAS;TBX3;LRP6
dorsal/ventral axis specification (GO:0009950)	2016-03-14	0.206913	0.824706	11.1706	-2.15289	SMAD6;VAX2;LRP6
negative regulation of transcription regulatory region DNA binding (GO:2000678)	2016-03-14	0.206913	0.824706	11.2801	-2.174	MSX2;LHX2;ZNF675
centrosome localization (GO:0051642)	2016-03-14	0.206913	0.824706	11.4888	-2.21423	PLXNA2;NUBP1;SYNE2
mitotic G2 DNA damage checkpoint (GO:0007095)	2016-03-14	0.206913	0.824706	11.515	-2.21927	BLM;TAOK3;NBN
arachidonic acid secretion (GO:0050482)	2016-03-14	0.206913	0.824706	11.5823	-2.23224	ANXA1;PNPLA8;PLA2G4A
regulation of intrinsic apoptotic signaling pathway in response to DNA damage by p53 class mediator (GO:1902165)	2016-03-14	0.206913	0.824706	11.6157	-2.23867	STEAP3;TAF9B;CD44
negative regulation of smooth muscle contraction (GO:0045986)	2016-03-14	0.206913	0.824706	11.6187	-2.23926	RGS2;ADRB2;PTGS2
cellular response to zinc ion (GO:0071294)	2016-03-14	0.206913	0.824706	11.6415	-2.24364	MT2A;MT1X;MT1E
icosanoid secretion (GO:0032309)	2016-03-14	0.206913	0.824706	11.6566	-2.24655	ANXA1;PNPLA8;PLA2G4A
fibril organization (GO:0097435)	2016-03-14	0.206913	0.824706	11.7211	-2.25899	CST3;COL5A1;B4GALT7
ganglioside metabolic process (GO:0001573)	2016-03-14	0.206913	0.824706	11.7468	-2.26395	NEU3;GM2A;HEXB
negative regulation of DNA recombination (GO:0045910)	2016-03-14	0.206913	0.824706	11.8854	-2.29065	BLM;MSH2;BCL6
positive regulation of transcription elongation from RNA polymerase II promoter (GO:0032968)	2016-03-14	0.206913	0.824706	11.9199	-2.2973	DAB2;CTR9;CDC73
snRNA processing (GO:0016180)	2016-03-14	0.206913	0.824706	12.1724	-2.34597	INTS2;INTS4;INTS8
serine family amino acid biosynthetic process (GO:0009070)	2016-03-14	0.206913	0.824706	12.3272	-2.3758	CTH;SHMT1;SEPHS2
retinal metabolic process (GO:0042574)	2016-03-14	0.206913	0.824706	12.4215	-2.39398	ALDH1A3;AKR1C1;CYP1B1
chondroitin sulfate catabolic process (GO:0030207)	2016-03-14	0.206913	0.824706	12.4277	-2.39517	HEXB;IDS;CSPG4
pyrimidine nucleoside monophosphate metabolic process (GO:0009129)	2016-03-14	0.206913	0.824706	12.4857	-2.40634	NT5M;UPRT;DHODH
positive regulation of protein catabolic process (GO:0045732)	17/130	0.208228	0.825483	0.742744	-0.142448	PLK3;UQCC2;EGF;PLK2;RHBDD1;CBLB;PSEN1;CLU;FOXO1;PIAS1;DAB2;GCLC;ESPL1;APC;BBS7;TRIB1;CTSC
response to glucocorticoid (GO:0051384)	17/130	0.208228	0.825483	0.765494	-0.146811	CDKN1A;ANXA1;GOT1;GBA;BCKDHB;ADM;PLAT;FOS;PTGS2;FBXO32;FOSL1;CYP11A1;FOSB;SMYD3;CALM1;ACADS;PCK2
positive regulation of leukocyte mediated cytotoxicity (GO:0001912)	1937-06-01	0.20789	0.825483	2.95393	-0.566524	HLA-H;CADM1;HLA-C;HLA-A;MR1;HLA-E
cellular metabolic compound salvage (GO:0043094)	1937-06-01	0.20789	0.825483	3.0083	-0.576952	PNP;GOT1;ADI1;ADK;DCK;ADA
regulation of nitric-oxide synthase activity (GO:0050999)	1937-06-01	0.20789	0.825483	3.01335	-0.577921	GCHFR;SCARB1;SPR;GCH1;ATP2B4;CALM1
triglyceride metabolic process (GO:0006641)	1987-12-01	0.209825	0.831089	1.19416	-0.220942	GPX1;GK;DGAT1;ELOVL4;INSIG1;TECR;CAT;PNPLA3;LPL;ABHD5;ELOVL7;AGPAT4
organic anion transport (GO:0015711)	39/328	0.214763	0.831782	0.516421	-0.0951172	SCARB1;SLC46A1;SLC35B4;SLC35D1;STXBP1;ATP10D;SLC1A3;PSEN1;CLN8;GLS;SLC25A26;SLC9A3R1;SCP2;MPC1;MYO6;SLC16A7;SLC38A9;ATP9B;SLC19A2;MFSD2A;ABCA1;PRELID2;SLC35A1;PRKAB2;ANXA1;ATP8B3;SLMO1;PNPLA8;ABCC5;AKR1C1;PLA2G4A;HBA1;SLC4A7;PLIN2;NFKBIE;SFXN5;SLC26A6;SERINC5;PPARD
neurotrophin TRK receptor signaling pathway (GO:0048011)	33/274	0.217214	0.831782	0.532278	-0.0980379	CDKN1A;ITPR2;PIK3R1;AATF;FOXO3;PCSK5;FOXO1;RPS6KA5;BCL2L11;THEM4;RICTOR;VAV3;DUSP4;DUSP3;EGF;KIDINS220;RIPK2;ARHGEF17;GAB1;PPP2R5D;DUSP6;NET1;NR4A1;KITLG;AGO3;NRG4;AGO1;ARHGEF3;HAP1;CALM1;MYD88;TNRC6B;HBEGF
reproductive structure development (GO:0048608)	32/265	0.217465	0.831782	0.540665	-0.0995827	CDKN1C;WDR48;DLX3;ADM;AHR;BRCA2;CYR61;ICAM1;PRDX4;BCL2L11;HES1;PHLDA2;PITX2;MAP3K4;E2F7;NKX3-1;FZD1;TFAP2C;HMGCS1;BIK;NCOA3;NCOA4;GAB1;ARID5B;ESR2;TBX3;BMP5;AR;KITLG;MSH2;LGR4;ADA
DNA-templated transcription, initiation (GO:0006352)	27/220	0.217709	0.831782	0.585298	-0.107803	NOTCH2;RARG;SERPINE1;UBE2D1;CTGF;MED30;TAF9B;PPARGC1A;PTRF;CDKN2B;PARP1;TAF12;VDR;NR1D1;GTF2H2;ESR2;NR4A2;NR4A1;AR;NR4A3;RBL1;MED24;TFDP2;TAF4B;MAML3;TAF2;PPARD
embryo development (GO:0009790)	33/276	0.228515	0.831782	0.615152	-0.113302	NOTCH2;FUT10;CCNB2;HHEX;BCL2L11;MAN2A1;KIF3A;TCTN1;RICTOR;PITX2;MYH10;WDTC1;OSR2;STIL;EDN1;DUSP3;ENDOG;KIDINS220;WDR19;HUS1;TBX3;KLF2;RUNX1;FOSL1;MYO1E;DAB2;MSH2;MAFF;SNAI2;MYH9;TAB1;CCNO;DSC3
positive regulation of MAPK cascade (GO:0043410)	46/395	0.229344	0.831782	0.665769	-0.122625	PRKAA1;C5AR2;CHRNA7;DUSP19;CXCR4;TGFA;NOD1;PSEN1;HMGCR;ADRB2;MST1R;PRKCZ;THBS1;ICAM1;GNAI2;CTGF;SDCBP;DSTYK;IRAK2;TRIM5;PRKCDBP;GCNT2;S1PR2;MAP3K6;MAP3K4;MAP2K3;EDN1;GPR37;MAP3K1;GADD45B;EGF;GADD45A;KIDINS220;RIPK2;IGFBP3;GAB1;MID1;DUSP22;DAB2;KITLG;MDFIC;TAOK3;CSPG4;TAB1;CD44;MYD88
proteasomal protein catabolic process (GO:0010498)	26/212	0.223909	0.831782	0.685145	-0.126194	UBE2D1;AURKB;UBE2J1;PSMD8;ATXN3;FOXRED2;OS9;FBXO4;BTRC;SKP1;EDEM3;TOR1A;HSPA5;WFS1;RHBDD1;SIAH1;NR1D1;KLHL20;CD2AP;RNF103;APC;DDIT3;DNAJC10;ANAPC4;ANAPC5;TRIM38
in utero embryonic development (GO:0001701)	27/222	0.230354	0.831782	0.696571	-0.128298	NOTCH2;CCNB2;HHEX;BCL2L11;MAN2A1;KIF3A;TCTN1;PITX2;MYH10;WDTC1;EDN1;STIL;DUSP3;ENDOG;KIDINS220;WDR19;KLF2;TBX3;RUNX1;FOSL1;MYO1E;DAB2;MSH2;MAFF;MYH9;TAB1;DSC3
hormone metabolic process (GO:0042445)	20/158	0.220666	0.831782	0.705709	-0.129981	SCARB1;STARD5;ERO1LB;DGAT1;AKR1C1;SRD5A3;DIO3;AKR1B1;ADM;IDE;HSD17B11;HSD17B7;PCSK5;SULT1A1;ALDH1A3;SCP2;CYP11A1;SELM;CYP1B1;PPARGC1A
extracellular matrix organization (GO:0030198)	42/359	0.232943	0.831782	0.708297	-0.130458	ERO1LB;SDC4;LAMA4;SDC2;SERPINE1;COL12A1;MIA3;PLOD2;PSEN1;F11R;THBS1;FBLN5;LOXL1;CYR61;ICAM1;ERO1L;LOXL2;CST3;ADAMTS5;PRDX4;CTSL;ADAMTSL4;CYP1B1;APBB2;ITGAV;TIMP1;CTSB;LEPREL1;MYO1E;CCDC80;P4HA1;COL5A1;ELF3;CRISPLD2;SMOC1;ITGA6;ITGA5;TGFBI;B4GALT7;CD44;FBN1;PLEC
response to carbohydrate (GO:0009743)	18/139	0.210231	0.831782	0.711626	-0.131071	TCF7L2;EIF2B3;GPX1;PTGS2;THBS1;AACS;ICAM1;CTGF;TJP1;CST3;MLXIPL;CYP11A1;UCP2;TXNIP;SLC26A6;SOX4;PCK2;PPARD
regulation of protein ubiquitination (GO:0031396)	26/212	0.223909	0.831782	0.71242	-0.131217	WDR48;UBE2D1;ADRB2;PSEN1;CLU;PSMD8;RASSF1;FBXO4;BTRC;SOX4;SKP1;FANCI;HSPA5;EGF;WFS1;RIPK2;ARRDC3;COMMD1;PDCL3;GCLC;TBC1D7;PELI1;CRY1;ANAPC4;ANAPC5;BIRC3
regulation of leukocyte proliferation (GO:0070663)	22/176	0.222393	0.831782	0.714606	-0.13162	VAV3;CDKN1A;BLM;RIPK2;ADK;CBLB;AHR;PRDM1;EFNB1;KITLG;PNP;BCL6;IRF1;SELK;PELI1;TNFSF9;PTPN6;HES1;TNFRSF21;MYD88;ADA;CD276
response to wounding (GO:0009611)	21/167	0.22163	0.831782	0.737385	-0.135816	SCARB1;JUN;MAP3K1;ABHD2;FUT10;SDC2;TGFA;SLC1A3;MIA3;NMNAT3;ADM;PLAT;HOXB13;CTGF;CST3;HHEX;HMOX1;ID3;TIMP1;CD44;PPARD
cell-substrate adhesion (GO:0031589)	18/140	0.218012	0.831782	0.751753	-0.138462	TNFRSF12A;PARVA;LYPD3;SORBS1;SMAD6;FBLN5;CTGF;PPFIBP1;BCAM;BCL2L11;MICALL2;ITGA6;ITGAV;ITGA5;FERMT2;CD44;VCL;PPARD
response to corticosteroid (GO:0031960)	18/140	0.218012	0.831782	0.760371	-0.140049	CDKN1A;ANXA1;GOT1;GBA;BCKDHB;ADM;PLAT;FOS;PTGS2;FBXO32;CTGF;FOSL1;CYP11A1;FOSB;SMYD3;CALM1;ACADS;PCK2
actin filament organization (GO:0007015)	19/150	0.227161	0.831782	0.764112	-0.140738	VASP;MICAL3;NEDD9;ARAP1;SHROOM1;SORBS1;RND1;EPS8;LIMA1;DIAPH2;BIN3;SCIN;ABI1;FSCN1;MICALL2;CDC42EP2;ABL2;CORO7;MSRB1
positive regulation of protein complex assembly (GO:0031334)	16/122	0.214095	0.831782	0.799166	-0.147195	SH3GLB1;UNC13B;VASP;MAP3K1;BIK;AHR;IDE;TERF1;ICAM1;RGS2;BCL2L11;SCIN;APC;CDC42EP2;RICTOR;ARHGEF5
proteasome-mediated ubiquitin-dependent protein catabolic process (GO:0043161)	25/205	0.23709	0.831782	0.822182	-0.151434	UBE2D1;AURKB;UBE2J1;PSMD8;ATXN3;FOXRED2;OS9;FBXO4;BTRC;SKP1;EDEM3;TOR1A;HSPA5;WFS1;RHBDD1;SIAH1;CD2AP;KLHL20;RNF103;APC;DDIT3;DNAJC10;ANAPC4;ANAPC5;TRIM38
regulation of cellular ketone metabolic process (GO:0010565)	22/178	0.236722	0.831782	0.859939	-0.158388	TCF7L2;PRKAB2;ANKRD26;SLC35B4;ANXA1;SMEK1;INSIG1;EIF2AK3;ATP2B4;PDHB;NR1D1;PTGS2;FOXO1;BMP5;PSMD8;MLXIPL;PDPR;PDP2;PDK4;PPARGC1A;WDTC1;PLIN5
extracellular structure organization (GO:0043062)	42/360	0.238039	0.831782	0.869918	-0.160226	ERO1LB;SDC4;LAMA4;SDC2;SERPINE1;COL12A1;MIA3;PLOD2;PSEN1;F11R;THBS1;FBLN5;LOXL1;CYR61;ERO1L;LOXL2;ICAM1;CST3;ADAMTS5;PRDX4;ADAMTSL4;CTSL;CYP1B1;APBB2;ITGAV;TIMP1;CTSB;LEPREL1;MYO1E;CCDC80;P4HA1;COL5A1;ELF3;CRISPLD2;SMOC1;ITGA6;ITGA5;TGFBI;B4GALT7;CD44;FBN1;PLEC
glycerophospholipid biosynthetic process (GO:0046474)	22/178	0.236722	0.831782	0.873634	-0.160911	SH3GLB1;PI4K2B;PIGU;MTMR3;DGAT1;PNPLA8;MBOAT1;PLA2G4A;SYNJ2;ABHD5;PIK3R1;AGPAT4;PLA2G16;IMPA1;ETNK1;PIGA;LPCAT3;LPCAT2;INPP5J;PNPLA3;LPIN3;PIGH
neurotrophin signaling pathway (GO:0038179)	33/278	0.240085	0.831782	0.907971	-0.167235	CDKN1A;ITPR2;PIK3R1;AATF;FOXO3;PCSK5;FOXO1;RPS6KA5;BCL2L11;THEM4;RICTOR;VAV3;DUSP4;DUSP3;KIDINS220;EGF;RIPK2;ARHGEF17;GAB1;PPP2R5D;DUSP6;NET1;NR4A1;KITLG;AGO3;NRG4;AGO1;ARHGEF3;HAP1;CALM1;MYD88;HBEGF;TNRC6B
regulation of response to DNA damage stimulus (GO:2001020)	16/124	0.231039	0.831782	0.912705	-0.168107	STEAP3;TMEM161A;RPA2;CLU;RINT1;NSMCE4A;RNF169;SNAI1;SMYD2;CRY1;SNAI2;EEF1E1;TAF9B;CD44;RAD9A;NKX3-1
negative regulation of neuron apoptotic process (GO:0043524)	17/133	0.232659	0.831782	0.937334	-0.172643	JUN;CEBPB;WFS1;STXBP1;SIX1;PSEN1;OXR1;NR4A2;GCLC;MSH2;PPT1;HMOX1;PPARGC1A;NES;LGMN;ZPR1;CPEB4
activation of MAPK activity (GO:0000187)	17/133	0.232659	0.831782	0.960382	-0.176888	MAP2K3;PRKAA1;MAP3K1;RIPK2;CHRNA7;GAB1;TGFA;CXCR4;NOD1;THBS1;DAB2;MDFIC;IRAK2;CSPG4;S1PR2;TAB1;MAP3K6
positive regulation of lymphocyte proliferation (GO:0050671)	15/115	0.229027	0.831782	1.01531	-0.187005	VAV3;CDKN1A;BLM;RIPK2;ADK;EFNB1;PNP;BCL6;SELK;PELI1;TNFSF9;HES1;MYD88;ADA;CD276
response to glucose (GO:0009749)	14/106	0.226543	0.831782	1.0682	-0.196747	TCF7L2;EIF2B3;GPX1;THBS1;AACS;ICAM1;CTGF;TJP1;MLXIPL;UCP2;TXNIP;SOX4;PCK2;PPARD
cellular amino acid biosynthetic process (GO:0008652)	14/106	0.226543	0.831782	1.08437	-0.199725	OAT;GOT1;GCH1;ASNSD1;SHMT1;SLC1A3;MTR;GLS;GCLC;ADI1;CTH;ASL;SEPHS2;ALDH7A1
internal peptidyl-lysine acetylation (GO:0018393)	14/106	0.226543	0.831782	1.0956	-0.201793	CCDC101;TAF12;NCOA3;YEATS4;ELP3;BRCA2;SUPT3H;POLE4;PER1;POR;MED24;ING3;KAT6B;TADA1
negative regulation of protein catabolic process (GO:0042177)	13/97	0.223483	0.831782	1.1327	-0.208627	MYCBP2;UBE2D1;PSEN1;TERF1;SVIP;CST3;PDCL3;APC;OPHN1;ANAPC4;ANAPC5;TIMP1;MAD1L1
epithelial cell development (GO:0002064)	14/107	0.235849	0.831782	1.17353	-0.216147	RARG;TFAP2C;GPX1;PRDM1;BMP5;ICAM1;SLC4A7;CST3;MYO1E;KLF5;AKAP9;VIM;MYD88;EXPH5
cellular response to tumor necrosis factor (GO:0071356)	1989-12-01	0.229788	0.831782	1.26968	-0.233856	EDN1;CYP11A1;GBA;SLC11A2;KRT8;CD58;PPARGC1A;THBS1;TNFRSF21;KLF2;ICAM1;NKX3-1
RNA phosphodiester bond hydrolysis (GO:0090501)	1989-12-01	0.229788	0.831782	1.27523	-0.234878	ISG20;DBR1;RNASEH2A;RNASET2;ELAC2;PPP1R8;RPP40;RPP21;RNASE4;UTP20;RPP25;CCRN4L
positive regulation of mononuclear cell proliferation (GO:0032946)	15/116	0.238004	0.831782	1.2885	-0.237322	VAV3;CDKN1A;BLM;RIPK2;ADK;EFNB1;PNP;BCL6;SELK;PELI1;TNFSF9;HES1;MYD88;ADA;CD276
negative regulation of DNA metabolic process (GO:0051053)	1980-11-01	0.225579	0.831782	1.40135	-0.258108	TSPYL2;PIF1;BLM;TIPIN;BMPR2;RNF169;MSH2;BCL6;HUS1;BRCA2;TERF1
negative regulation of cysteine-type endopeptidase activity (GO:2000117)	1971-10-01	0.220288	0.831782	1.46971	-0.270699	USP47;NR4A1;POR;TNFAIP8;GPX1;MKL1;IFI6;THBS1;SH3RF1;CD44
phenol-containing compound metabolic process (GO:0018958)	1981-11-01	0.236309	0.831782	1.52056	-0.280066	NR4A2;SULT1A1;GPR37;SPR;GCH1;NPR1;CYP11A1;EPAS1;MAOA;CHRNA7;DIO3
pyrimidine-containing compound metabolic process (GO:0072527)	1981-11-01	0.236309	0.831782	1.54577	-0.284708	APOBEC3C;PRPS1;DTYMK;RP2;TPK1;UPRT;NT5M;DCK;CCNO;DHODH;SLC19A2
positive regulation of chromosome organization (GO:2001252)	1972-10-01	0.231558	0.831782	1.57897	-0.290823	RNF20;RPS6KA5;ESPL1;CTR9;ASXL2;ARID5A;SNAI2;JARID2;PPARGC1A;PHF19
peptide transport (GO:0015833)	1972-10-01	0.231558	0.831782	1.58558	-0.292041	ABCA1;SLC9A3R1;EDN1;PCLO;ANXA1;EIF2AK3;ABCB9;SELT;CAMK2G;DISP1
post-Golgi vesicle-mediated transport (GO:0006892)	1990-12-01	0.240044	0.831782	1.58946	-0.292755	BBS2;SCFD1;BLOC1S6;MON2;RP2;SNAP23;GCC2;CORO7;AP3B2;SCAMP3;EXOC2;KLHL20
neural nucleus development (GO:0048857)	1963-09-01	0.22547	0.831782	1.76493	-0.325074	SLC4A7;ZNF430;ALDH1A3;HSPA5;YWHAQ;CNP;CCDC14;CALM1;PITX2
regulation of B cell proliferation (GO:0030888)	1954-08-01	0.217569	0.831782	1.84874	-0.340512	VAV3;CDKN1A;BCL6;PELI1;AHR;PRDM1;ADA;TNFRSF21
positive regulation of mitochondrion organization (GO:0010822)	1964-09-01	0.237604	0.831782	1.92426	-0.35442	SH3GLB1;BCL2L11;CASP8;YWHAQ;UQCC2;BIK;BNIP3;DNM1L;PPARGC1A
arachidonic acid metabolic process (GO:0019369)	1955-08-01	0.230471	0.831782	1.97994	-0.364676	CBR1;GPX1;PNPLA8;PLA2G4A;CYP1B1;LTA4H;PTGS2;PTGES
negative regulation of proteasomal protein catabolic process (GO:1901799)	1955-08-01	0.230471	0.831782	2.04321	-0.37633	APC;OPHN1;UBE2D1;ANAPC4;ANAPC5;TERF1;SVIP;MAD1L1
positive regulation of tumor necrosis factor superfamily cytokine production (GO:1903557)	1946-07-01	0.220946	0.831782	2.22575	-0.409951	RIPK2;HSPB1;NOD1;PIK3R1;THBS1;CLU;MYD88
regulation of DNA-templated transcription in response to stress (GO:0043620)	1946-07-01	0.220946	0.831782	2.30043	-0.423705	JUN;EGLN3;EPAS1;DDIT3;UBE2D1;HMOX1;KLF2
pigment biosynthetic process (GO:0046148)	1946-07-01	0.220946	0.831782	2.32077	-0.427453	ALAD;PRPS1;ALAS1;SHMT1;SLC11A2;PPOX;ADA
protein monoubiquitination (GO:0006513)	1946-07-01	0.220946	0.831782	2.35462	-0.433687	RNF20;FANCL;CTR9;TRIM21;CDC73;RNF2;SKP1
gluconeogenesis (GO:0006094)	1946-07-01	0.220946	0.831782	2.38923	-0.440061	G6PC3;GOT1;CRY1;ALDOC;PPARGC1A;ATF3;PCK2
skeletal muscle cell differentiation (GO:0035914)	1947-07-01	0.235079	0.831782	2.47196	-0.455299	NR4A1;KLF5;PLAGL1;MAFF;FOS;LEMD3;ATF3
positive regulation of myeloid leukocyte differentiation (GO:0002763)	1947-07-01	0.235079	0.831782	2.48628	-0.457936	KITLG;JUN;CASP8;ASXL2;GNAS;FOS;RUNX1
neuron death (GO:0070997)	1947-07-01	0.235079	0.831782	2.49681	-0.459876	POLB;PIGT;BNIP3;SIAH1;PSEN1;TNFRSF21;SLC9A1
negative regulation of lipid biosynthetic process (GO:0051055)	1938-06-01	0.223223	0.831782	3.00461	-0.553405	PRKAA1;INSIG1;SNAI1;SNAI2;BMP5;WDTC1
anion homeostasis (GO:0055081)	1938-06-01	0.223223	0.831782	3.02609	-0.557362	ABCA1;SLC9A3R1;MLXIPL;PRKAA1;GOT1;LYST
neuron apoptotic process (GO:0051402)	1938-06-01	0.223223	0.831782	3.04574	-0.560982	POLB;PIGT;BNIP3;SIAH1;PSEN1;TNFRSF21
regulation of multicellular organismal metabolic process (GO:0044246)	1939-06-01	0.238911	0.831782	3.41904	-0.629737	CST3;ARRDC3;ADRB2;OMA1;CTGF;PPARD
regulation of vasodilation (GO:0042312)	1939-06-01	0.238911	0.831782	3.56194	-0.656057	NPR1;HMOX1;ADM;HMGCR;ADRB2;PPARD
tRNA modification (GO:0006400)	1939-06-01	0.238911	0.831782	3.70348	-0.682127	PUS3;QTRT1;URM1;CDKAL1;ALKBH8;THG1L
positive regulation of glucose import (GO:0046326)	2016-05-30	0.223476	0.831782	4.06558	-0.748821	CREBL2;SORBS1;PIK3R1;ADIPOR2;PRKCZ
regulation of intracellular pH (GO:0051453)	2016-05-30	0.223476	0.831782	4.28162	-0.788611	CLIC4;PPT1;SLC26A6;SLC9A1;CLN5
lung cell differentiation (GO:0060479)	2016-05-30	0.223476	0.831782	4.32314	-0.796259	GPSM2;NUMB;KLF2;HOXA5;SAV1
tetrapyrrole biosynthetic process (GO:0033014)	2016-05-30	0.223476	0.831782	4.36573	-0.804104	ALAD;ALAS1;MMAA;SLC11A2;PPOX
negative regulation of interleukin-6 production (GO:0032715)	2016-05-31	0.241226	0.831782	4.47699	-0.824597	RABGEF1;C5AR2;CHRNA7;GBA;KLF2
plasma lipoprotein particle organization (GO:0071827)	2016-05-31	0.241226	0.831782	4.69257	-0.864302	ABCA1;SCARB1;DGAT1;ABCA5;LPL
hyaluronan metabolic process (GO:0030212)	2016-05-31	0.241226	0.831782	4.7879	-0.881862	ITIH4;HEXB;ABCC5;CD44;SLC9A1
mitotic spindle organization (GO:0007052)	2016-05-31	0.241226	0.831782	4.92085	-0.906348	DYNC1H1;PLK2;SPICE1;NEK2;SPC25
membrane protein proteolysis (GO:0033619)	2016-05-31	0.241226	0.831782	4.95675	-0.912961	RHBDD1;ERAP1;SPPL2A;MYH9;PSEN1
regulation of microtubule polymerization (GO:0031113)	2016-04-22	0.219729	0.831782	6.34867	-1.16933	RGS2;APC;INPP5J;TERF1
cellular response to nutrient (GO:0031670)	2016-04-22	0.219729	0.831782	6.41487	-1.18153	CDKN2B;VDR;HMOX1;USF1
regulation of viral release from host cell (GO:1902186)	2016-04-22	0.219729	0.831782	6.43937	-1.18604	TRIM5;CHMP4C;TRIM15;TRIM21
negative regulation of cyclin-dependent protein serine/threonine kinase activity (GO:0045736)	2016-04-22	0.219729	0.831782	6.47628	-1.19284	LATS1;CDKN1A;HHEX;APC
phospholipid dephosphorylation (GO:0046839)	2016-04-22	0.219729	0.831782	6.56414	-1.20902	MTMR3;INPP5J;SYNJ2;PPAPDC1B
focal adhesion assembly (GO:0048041)	2016-04-23	0.240411	0.831782	6.74227	-1.24183	TESK2;SORBS1;PTPRK;FERMT2
cell-substrate adherens junction assembly (GO:0007045)	2016-04-23	0.240411	0.831782	6.7728	-1.24745	TESK2;SORBS1;PTPRK;FERMT2
glutamine metabolic process (GO:0006541)	2016-04-23	0.240411	0.831782	6.78771	-1.2502	ASNSD1;GFPT2;GGH;GLS
positive regulation of steroid metabolic process (GO:0045940)	2016-04-23	0.240411	0.831782	6.78863	-1.25037	PRKAA1;POR;SCP2;NR1D1
cranial nerve development (GO:0021545)	2016-04-22	0.219729	0.831782	6.79481	-1.2515	TMEM126A;SLC1A3;HES1;NAV2
negative regulation of GTPase activity (GO:0034260)	2016-04-23	0.240411	0.831782	6.83752	-1.25937	ARFGEF1;BCAS3;FICD;GMIP
negative regulation of GTP catabolic process (GO:0033125)	2016-04-23	0.240411	0.831782	6.88053	-1.26729	ARFGEF1;BCAS3;FICD;GMIP
cholesterol efflux (GO:0033344)	2016-04-23	0.240411	0.831782	6.94379	-1.27895	ABCA1;SCARB1;STX12;ABCA5
middle ear morphogenesis (GO:0042474)	2016-04-23	0.240411	0.831782	7.02141	-1.29324	OSR2;EDN1;INSIG1;SIX1
regulation of catenin import into nucleus (GO:0035412)	2016-04-23	0.240411	0.831782	7.05237	-1.29894	FZD1;EGF;BAMBI;SNAI2
sister chromatid segregation (GO:0000819)	2016-04-23	0.240411	0.831782	7.19062	-1.32441	LATS1;ESPL1;NEK2;ZWINT
response to ATP (GO:0033198)	2016-04-23	0.240411	0.831782	7.20573	-1.32719	PANX1;P2RX4;CASP1;PTGS2
negative regulation of steroid metabolic process (GO:0045939)	2016-04-23	0.240411	0.831782	7.23023	-1.3317	INSIG1;SNAI1;SNAI2;BMP5
aerobic respiration (GO:0009060)	2016-04-22	0.219729	0.831782	7.2494	-1.33523	CAT;MTFR1;MTFR2;SLC25A14
negative regulation of microtubule depolymerization (GO:0007026)	2016-04-23	0.240411	0.831782	7.33638	-1.35125	APC;MID1;AURKB;CLASP2
glycerol metabolic process (GO:0006071)	2016-04-23	0.240411	0.831782	7.48007	-1.37772	GK5;COQ3;GK;GOT1
regulation of cell proliferation involved in heart morphogenesis (GO:2000136)	2016-03-15	0.232298	0.831782	10.1319	-1.86615	SIX1;HES1;LRP6
pharyngeal system development (GO:0060037)	2016-03-15	0.232298	0.831782	10.6691	-1.9651	PLXNA2;SIX1;NKX3-1
hair cell differentiation (GO:0035315)	2016-03-15	0.232298	0.831782	10.7677	-1.98326	JAG1;MYO6;PITX2
negative regulation of alcohol biosynthetic process (GO:1902931)	2016-03-15	0.232298	0.831782	10.8219	-1.99324	SNAI1;SNAI2;BMP5
TOR signaling (GO:0031929)	2016-03-15	0.232298	0.831782	10.9681	-2.02017	CCDC88A;RICTOR;RHEBL1
cyclooxygenase pathway (GO:0019371)	2016-03-15	0.232298	0.831782	11.1335	-2.05062	CBR1;PTGS2;PTGES
brain morphogenesis (GO:0048854)	2016-03-15	0.232298	0.831782	11.1581	-2.05516	BBS2;SPEF2;PSEN1
dorsal/ventral neural tube patterning (GO:0021904)	2016-03-15	0.232298	0.831782	11.2171	-2.06602	KIF3A;TCTN1;PSEN1
regulation of spindle checkpoint (GO:0090231)	2016-03-15	0.232298	0.831782	11.2324	-2.06885	DYNC1LI1;NDRG1;CDK5RAP2
negative regulation of DNA biosynthetic process (GO:2000279)	2016-03-15	0.232298	0.831782	11.2333	-2.06901	PIF1;BMPR2;TERF1
positive regulation of sodium ion transmembrane transport (GO:1902307)	2016-03-15	0.232298	0.831782	11.2813	-2.07785	CNKSR3;GLRX;ATP1B2
response to caffeine (GO:0031000)	2016-03-15	0.232298	0.831782	11.3057	-2.08235	PRKAA1;SDC2;DHODH
ovulation (GO:0030728)	2016-03-15	0.232298	0.831782	11.3075	-2.08268	ADAMTS1;PTGS2;FOXO3
negative regulation of viral release from host cell (GO:1902187)	2016-03-15	0.232298	0.831782	11.3452	-2.08963	TRIM5;TRIM15;TRIM21
regulation of ruffle assembly (GO:1900027)	2016-03-15	0.232298	0.831782	11.4606	-2.11088	EPS8L1;ARHGAP24;ICAM1
female genitalia development (GO:0030540)	2016-03-15	0.232298	0.831782	11.5839	-2.13359	NCOA3;TBX3;ESR2
pyrimidine deoxyribonucleotide metabolic process (GO:0009219)	2016-03-15	0.232298	0.831782	11.6442	-2.14469	DTYMK;NT5M;CCNO
maintenance of protein location in nucleus (GO:0051457)	2016-03-15	0.232298	0.831782	11.7077	-2.15639	ARL2BP;TAF8;TAF3
phosphatidylethanolamine metabolic process (GO:0046337)	2016-03-15	0.232298	0.831782	11.7385	-2.16205	PNPLA8;ETNK1;LPIN3
microtubule nucleation (GO:0007020)	2016-03-15	0.232298	0.831782	11.8709	-2.18645	NDE1;TUBGCP5;CLASP2
metallo-sulfur cluster assembly (GO:0031163)	2016-03-15	0.232298	0.831782	11.9143	-2.19443	NFU1;ISCA1;NUBP1
regulation of protein homooligomerization (GO:0032462)	2016-03-15	0.232298	0.831782	11.9256	-2.19652	BCL2L11;BIK;CLU
androgen biosynthetic process (GO:0006702)	2016-03-15	0.232298	0.831782	11.9985	-2.20995	SCARB1;CYP11A1;SRD5A3
zinc ion transmembrane transport (GO:0071577)	2016-03-15	0.232298	0.831782	12.0238	-2.21461	SLC30A3;SLC30A5;SLC11A2
iron-sulfur cluster assembly (GO:0016226)	2016-03-15	0.232298	0.831782	12.0338	-2.21645	NFU1;ISCA1;NUBP1
snRNA metabolic process (GO:0016073)	2016-03-15	0.232298	0.831782	12.0359	-2.21684	INTS2;INTS4;INTS8
vesicle targeting (GO:0006903)	2016-03-15	0.232298	0.831782	13.137	-2.41964	SNAP23;AP1AR;PSEN1
antigen processing and presentation via MHC class Ib (GO:0002475)	2016-02-08	0.23765	0.831782	24.4976	-4.5121	AP3B1;HLA-E
regulation of secondary heart field cardioblast proliferation (GO:0003266)	2016-02-08	0.23765	0.831782	25.0077	-4.60606	SIX1;HES1
glial cell proliferation (GO:0014009)	2016-02-08	0.23765	0.831782	25.0295	-4.61008	CLU;SOX4
negative regulation of T cell differentiation in thymus (GO:0033085)	2016-02-08	0.23765	0.831782	25.1134	-4.62552	ZC3H8;NFKBID
regulation of cardioblast proliferation (GO:0003264)	2016-02-08	0.23765	0.831782	25.3686	-4.67253	SIX1;HES1
regulation of chemokine-mediated signaling pathway (GO:0070099)	2016-02-08	0.23765	0.831782	25.4078	-4.67975	EDN1;ROBO1
ovulation from ovarian follicle (GO:0001542)	2016-02-08	0.23765	0.831782	25.5915	-4.71357	ADAMTS1;FOXO3
pyrimidine-containing compound transmembrane transport (GO:0072531)	2016-02-08	0.23765	0.831782	25.6473	-4.72385	SLC35D1;SLC19A2
low-density lipoprotein particle clearance (GO:0034383)	2016-02-08	0.23765	0.831782	26.0539	-4.79875	SCARB1;HMOX1
regulation of dendritic cell antigen processing and presentation (GO:0002604)	2016-02-08	0.23765	0.831782	26.3423	-4.85186	NOD1;THBS1
negative regulation of mast cell activation (GO:0033004)	2016-02-08	0.23765	0.831782	26.3798	-4.85877	RABGEF1;HMOX1
positive regulation of heterotypic cell-cell adhesion (GO:0034116)	2016-02-08	0.23765	0.831782	26.9537	-4.96448	GCNT2;CD44
purine nucleotide salvage (GO:0032261)	2016-02-08	0.23765	0.831782	26.9649	-4.96654	ADK;ADA
negative regulation of thymocyte apoptotic process (GO:0070244)	2016-02-08	0.23765	0.831782	27.0189	-4.97649	BLM;ADA
cellular response to ATP (GO:0071318)	2016-02-08	0.23765	0.831782	27.3947	-5.0457	P2RX4;PTGS2
regulation of transforming growth factor beta1 production (GO:0032908)	2016-02-08	0.23765	0.831782	27.4201	-5.05039	THBS1;CD2AP
radial glial cell differentiation (GO:0060019)	2016-02-08	0.23765	0.831782	27.4682	-5.05925	HES1;LRP6
phenol-containing compound catabolic process (GO:0019336)	2016-02-08	0.23765	0.831782	28.3028	-5.21297	MAOA;DIO3
regulation of Wnt signaling pathway involved in heart development (GO:0003307)	2016-02-08	0.23765	0.831782	28.3073	-5.21379	MESP1;LRP6
desmosome organization (GO:0002934)	2016-02-08	0.23765	0.831782	28.4054	-5.23187	PERP;SNAI2
histamine secretion (GO:0001821)	2016-02-08	0.23765	0.831782	28.567	-5.26163	EDN1;ADA
keratinocyte development (GO:0003334)	2016-02-08	0.23765	0.831782	28.5895	-5.26576	TFAP2C;EXPH5
regulation of histone H3-K27 methylation (GO:0061085)	2016-02-08	0.23765	0.831782	28.6231	-5.27195	ASXL2;PHF19
valine metabolic process (GO:0006573)	2016-02-08	0.23765	0.831782	28.8091	-5.30622	HIBADH;HIBCH
negative regulation of erythrocyte differentiation (GO:0045647)	2016-02-08	0.23765	0.831782	29.0836	-5.35677	MAFB;HOXA5
respiratory tube development (GO:0030323)	2016-02-08	0.23765	0.831782	29.2692	-5.39097	PCSK5;HOXA5
intestinal epithelial cell development (GO:0060576)	2016-02-08	0.23765	0.831782	29.2942	-5.39556	KLF5;PRDM1
negative regulation of epidermal growth factor-activated receptor activity (GO:0007175)	2016-02-08	0.23765	0.831782	29.4814	-5.43004	PSEN1;SNX6
daunorubicin metabolic process (GO:0044597)	2016-02-08	0.23765	0.831782	29.5292	-5.43886	AKR1C1;AKR1B1
negative regulation of vascular endothelial growth factor receptor signaling pathway (GO:0030948)	2016-02-08	0.23765	0.831782	29.5508	-5.44283	PTPN1;HHEX
skin morphogenesis (GO:0043589)	2016-02-08	0.23765	0.831782	29.5683	-5.44605	GBA;PSEN1
cysteine metabolic process (GO:0006534)	2016-02-08	0.23765	0.831782	29.5799	-5.44819	GCLC;CTH
regulation of translational termination (GO:0006449)	2016-02-08	0.23765	0.831782	29.5864	-5.44938	MTRF1;EIF5A2
chaperone-mediated protein transport (GO:0072321)	2016-02-08	0.23765	0.831782	29.6001	-5.4519	PEX19;TOR1A
synaptic vesicle maturation (GO:0016188)	2016-02-08	0.23765	0.831782	29.626	-5.45667	SNAPIN;STXBP1
polyketide metabolic process (GO:0030638)	2016-02-08	0.23765	0.831782	29.6868	-5.46787	AKR1C1;AKR1B1
doxorubicin metabolic process (GO:0044598)	2016-02-08	0.23765	0.831782	29.7029	-5.47085	AKR1C1;AKR1B1
regulation of telomere maintenance via telomerase (GO:0032210)	2016-02-08	0.23765	0.831782	29.8646	-5.50062	PIF1;TERF1
cellular response to ethanol (GO:0071361)	2016-02-08	0.23765	0.831782	29.8971	-5.5066	PRKAA1;ITPR2
interkinetic nuclear migration (GO:0022027)	2016-02-08	0.23765	0.831782	29.9285	-5.5124	HHEX;CEP120
regulation of transcription from RNA polymerase II promoter in response to oxidative stress (GO:0043619)	2016-02-08	0.23765	0.831782	29.9688	-5.51982	EPAS1;HMOX1
synaptic vesicle docking involved in exocytosis (GO:0016081)	2016-02-08	0.23765	0.831782	30.0629	-5.53715	UNC13B;BLOC1S6
pyrimidine deoxyribonucleotide catabolic process (GO:0009223)	2016-02-08	0.23765	0.831782	30.0886	-5.54188	NT5M;CCNO
base-excision repair, AP site formation (GO:0006285)	2016-02-08	0.23765	0.831782	30.185	-5.55963	OGG1;CCNO
monoubiquitinated protein deubiquitination (GO:0035520)	2016-02-08	0.23765	0.831782	30.1992	-5.56226	USP47;ATXN3
sodium ion export (GO:0071436)	2016-02-08	0.23765	0.831782	30.7132	-5.65692	ATP1B2;SLC9A1
ganglion development (GO:0061548)	2016-02-08	0.23765	0.831782	31.1643	-5.74002	NRP2;TULP3
folic acid transport (GO:0015884)	2016-02-08	0.23765	0.831782	31.276	-5.76059	SLC46A1;SLC19A2
microtubule severing (GO:0051013)	2016-02-08	0.23765	0.831782	31.3531	-5.77479	SPAST;KATNA1
fibroblast migration (GO:0010761)	2016-02-08	0.23765	0.831782	32.0962	-5.91166	ARID5B;SYNE2
negative regulation of telomerase activity (GO:0051974)	2016-02-08	0.23765	0.831782	32.2928	-5.94787	PIF1;TERF1
positive regulation of vesicle fusion (GO:0031340)	2016-02-08	0.23765	0.831782	32.2973	-5.94869	C2CD5;ANXA1
mannose metabolic process (GO:0006013)	2016-02-08	0.23765	0.831782	33.5435	-6.17823	PMM1;MAN2A1
regulation of viral process (GO:0050792)	19/152	0.242883	0.836864	1.10949	-0.197592	SRPK2;APOBEC3C;IFITM1;JUN;YTHDC2;ZC3HAV1;GTF2H2;OASL;ISG20;TNIP1;SLPI;MDFIC;TRIM5;CHMP4C;TRIM14;TRIM15;TRIM59;TRIM38;TRIM21
morphogenesis of a branching structure (GO:0001763)	21/170	0.24382	0.836926	1.11815	-0.199053	EDN1;CLIC4;MSX2;EGF;VDR;NCOA3;SIX1;CXCR4;ADM;HOXB13;TBX3;PGF;LRP6;DLL4;HHEX;PITX2;BTRC;HOXA5;CD44;EPHA2;NKX3-1
MAPK cascade (GO:0000165)	21/170	0.24382	0.836926	1.12182	-0.199706	DUSP4;MAP2K3;PTGER4;JUN;DUSP3;EGF;RIPK2;DUSP19;NOD1;PPP2R5D;FOS;DUSP6;RPS6KA5;DUSP10;TAOK3;IRAK2;ITGAV;TAB1;TRIB1;MYD88;MAP3K4
regulation of lymphocyte proliferation (GO:0050670)	21/170	0.24382	0.836926	1.1321	-0.201536	VAV3;BLM;CDKN1A;RIPK2;ADK;CBLB;AHR;PRDM1;EFNB1;PNP;BCL6;IRF1;SELK;PELI1;TNFSF9;PTPN6;HES1;TNFRSF21;MYD88;ADA;CD276
positive regulation of cellular carbohydrate metabolic process (GO:0010676)	1956-08-01	0.243634	0.836926	2.39071	-0.425595	TCF7L2;MLXIPL;PRKAA1;HRH1;SMEK1;SORBS1;PPARGC1A;FOXO1
negative regulation of protein complex disassembly (GO:0043242)	1956-08-01	0.243634	0.836926	2.48479	-0.442343	EPS8;LIMA1;SCIN;APC;SPTAN1;MID1;AURKB;CLASP2
peptidyl-lysine acetylation (GO:0018394)	14/108	0.245306	0.841392	1.43734	-0.248224	CCDC101;TAF12;NCOA3;YEATS4;ELP3;BRCA2;SUPT3H;POLE4;PER1;POR;MED24;ING3;KAT6B;TADA1
GTP catabolic process (GO:0006184)	29/243	0.248795	0.845706	0.984743	-0.165027	RAB5B;ATL2;RASL11A;RND3;GNAI2;RND1;TUBB6;RASD1;MFN1;MFN2;RAB28;NUDT15;DNM1L;ADSS;RAB8B;EEFSEC;GCH1;TBCC;GTPBP8;TUBB4B;GNG11;GEM;RAB32;ARL4D;EHD4;TUBB2A;RAP2B;GNAS;RHEBL1
response to molecule of bacterial origin (GO:0002237)	29/243	0.248795	0.845706	1.04678	-0.175423	PTGER4;SCARB1;CEBPB;CNP;SERPINE1;CTR9;ADM;PTGS2;CDC73;ICAM1;DUSP10;CASP8;IRAK2;CYP11A1;CASP1;TIMP4;CCRN4L;ABCA1;JUN;EDN1;GCH1;RIPK2;FOS;NR1D1;TJP1;PELI1;TRIB1;MYD88;PTGES
DNA repair (GO:0006281)	46/403	0.269195	0.845706	1.05675	-0.177095	PIF1;BLM;RNASEH2A;WDR48;INO80D;XRCC6BP1;OGG1;CEP164;XPA;TONSL;BRCA2;RAD54B;POLB;ATXN3;ZFYVE26;SLX4;POLI;EXO5;NBN;FANCI;PRMT6;USP47;UVRAG;PARP1;FANCL;GADD45A;ACTR5;RPA2;HUS1;CHD1L;ESCO2;GTF2H2;INIP;SETX;EEPD1;RAD51D;NEIL2;NSMCE4A;TAOK3;MSH2;KIAA0101;POLE2;CRY1;NABP1;CCNO;RAD9A
chordate embryonic development (GO:0043009)	27/226	0.256604	0.845706	1.06513	-0.178498	NOTCH2;CCNB2;HHEX;BCL2L11;MAN2A1;KIF3A;TCTN1;PITX2;MYH10;WDTC1;STIL;EDN1;DUSP3;ENDOG;KIDINS220;WDR19;TBX3;KLF2;RUNX1;FOSL1;MYO1E;DAB2;MSH2;MAFF;MYH9;TAB1;DSC3
regulation of peptidyl-tyrosine phosphorylation (GO:0050730)	23/189	0.25133	0.845706	1.12046	-0.18777	EGF;RIPK2;TGFA;PSEN1;PRKCZ;ICAM1;PDCL3;KITLG;SOCS1;EHD4;RAP2B;ARL2BP;PPAP2B;DOK7;ABI1;UNC119;RICTOR;PTPN6;HES1;CSPG4;ITGA5;CD44;SNX6
skeletal system development (GO:0001501)	20/162	0.25125	0.845706	1.1413	-0.191264	CDKN1C;HES7;OSR2;GUSBP1;SLC35D1;VDR;HEXB;COL12A1;EIF2AK3;PCSK5;TBX3;PAPSS2;BMP5;RUNX1;PAPSS1;EXT1;EBP;SOX4;EPHA2;FBN1
guanosine-containing compound catabolic process (GO:1901069)	29/246	0.268227	0.845706	1.1493	-0.192605	RAB5B;ATL2;RASL11A;RND3;GNAI2;RND1;TUBB6;RASD1;MFN1;MFN2;RAB28;DNM1L;NUDT15;ADSS;RAB8B;EEFSEC;GCH1;TBCC;GTPBP8;TUBB4B;GNG11;GEM;RAB32;ARL4D;EHD4;TUBB2A;RAP2B;GNAS;RHEBL1
aminoglycan metabolic process (GO:0006022)	21/171	0.251418	0.845706	1.15193	-0.193045	ITIH4;SLC26A2;SDC4;SLC35D1;SDC2;HEXB;ABCC5;FUCA1;MAMDC2;GNS;PAPSS2;SLC9A1;PAPSS1;EXT1;GCNT2;IDS;CSPG4;B4GALT7;ST3GAL1;B4GALT4;CD44
ribose phosphate biosynthetic process (GO:0046390)	18/144	0.250367	0.845706	1.16003	-0.194403	PRPS2;PRPS1;SLC26A2;ACOT7;PANK3;NPR1;AK1;ADK;ADM;PYGL;PAPSS2;DHODH;PAPSS1;IMPDH1;RP2;GNAS;UPRT;ADSS
regulation of mononuclear cell proliferation (GO:0032944)	21/171	0.251418	0.845706	1.16466	-0.195178	VAV3;BLM;CDKN1A;RIPK2;ADK;CBLB;AHR;PRDM1;EFNB1;PNP;BCL6;IRF1;SELK;PELI1;TNFSF9;PTPN6;HES1;MYD88;ADA;TNFRSF21;CD276
peptidyl-lysine modification (GO:0018205)	19/153	0.250909	0.845706	1.17104	-0.196247	CCDC101;TAF12;NCOA3;CTR9;EIF5A2;SIRT5;YEATS4;ELP3;BRCA2;SUPT3H;POLE4;PER1;POR;MED24;ING3;KAT6B;CTH;SMYD2;TADA1
cell projection morphogenesis (GO:0048858)	27/228	0.270176	0.845706	1.21527	-0.20366	GALNT11;CNP;SDC2;ARHGEF28;MYCBP2;ULK4;SPAST;KIF3A;TCTN2;TCTN1;BBS7;FZD1;BBS2;KIDINS220;SLC11A2;PARVA;VAX2;NR4A2;IFT88;APC;TMEM216;TBCE;ABI1;S100A6;NUMB;NES;C5ORF30
regulation of intrinsic apoptotic signaling pathway (GO:2001242)	16/126	0.248523	0.845706	1.26883	-0.212636	STEAP3;GPX1;TMEM161A;WFS1;SIAH1;HSPB1;CLU;SLC9A3R1;BCL2L11;SNAI1;SNAI2;TAF9B;DNM1L;CD44;RAD9A;NKX3-1
negative regulation of cellular catabolic process (GO:0031330)	18/145	0.258742	0.845706	1.27319	-0.213366	ARFGEF1;BCAS3;FICD;ATP2B4;UBE2D1;PSEN1;GMIP;TERF1;SVIP;CST3;PDCL3;APC;OPHN1;ANAPC4;ANAPC5;TIMP1;MAD1L1;PLIN5
protein processing (GO:0016485)	24/201	0.272768	0.845706	1.2849	-0.215329	EGLN3;ERO1LB;HIP1;PARP1;CRADD;SLC11A2;EIF2AK3;NOD1;PLAT;OMA1;PSEN1;PCSK5;CLN5;ROBO1;ACER2;BCL2L13;CASP8;BCL2L11;PERP;CASP1;CAPN2;NMT2;TBC1D10A;NKX3-1
myeloid cell differentiation (GO:0030099)	19/154	0.259039	0.845706	1.28508	-0.215358	CDKN1C;CDKN2B;JUN;DYRK3;PARP1;EPAS1;VPS33A;NKAP;PSEN1;RUNX1;TGFBR3;DAB2;HHEX;CASP8;MYH9;TNFSF9;PTPN6;DNASE2;EPHA2
positive regulation of leukocyte differentiation (GO:1902107)	15/118	0.25637	0.845706	1.3805	-0.23135	JUN;RIPK2;NKAP;AP3B1;FOS;PRDM1;PRKCZ;RUNX1;KITLG;PNP;CASP8;ASXL2;GNAS;TNFSF9;ADA
regulation of leukocyte migration (GO:0002685)	14/110	0.264642	0.845706	1.60002	-0.268137	PTGER4;EDN1;EDN2;C5AR2;SERPINE1;MIA3;THBS1;BMP5;ICAM1;STK10;RABGEF1;SELK;HMOX1;ADA
negative regulation of protein complex assembly (GO:0031333)	1991-12-01	0.250469	0.845706	1.6477	-0.276127	PTGER4;ARFGEF1;EPS8;SCIN;LMO4;INSIG1;INPP5J;SMAD6;CLU;SPTAN1;SVIP;PRKCZ
histone acetylation (GO:0016573)	13/101	0.263114	0.845706	1.72169	-0.288527	CCDC101;TAF12;NCOA3;YEATS4;ELP3;BRCA2;SUPT3H;POLE4;PER1;ING3;MED24;KAT6B;TADA1
autophagy (GO:0006914)	13/102	0.273388	0.845706	1.76424	-0.295658	PRKAA1;ATG10;FOXO1;DRAM1;ATG16L2;ATG2A;ULK3;ATG4C;MFN2;EPG5;HAP1;TECPR1;ATG4D
male gonad development (GO:0008584)	1982-11-01	0.247228	0.845706	1.77812	-0.297985	KITLG;TFAP2C;PRDX4;BCL2L11;MSH2;HMGCS1;BIK;NCOA4;ARID5B;PITX2;NKX3-1
hormone-mediated signaling pathway (GO:0009755)	1993-12-01	0.271792	0.845706	1.84967	-0.309975	LATS1;NR4A2;NR4A1;AR;RARG;NR4A3;VDR;NR1D1;ADIPOR2;ESR2;NKX3-1;PPARD
acylglycerol metabolic process (GO:0006639)	1993-12-01	0.271792	0.845706	1.85686	-0.31118	GPX1;GK;DGAT1;ELOVL4;INSIG1;TECR;CAT;PNPLA3;LPL;ABHD5;ELOVL7;AGPAT4
positive regulation of cell-substrate adhesion (GO:0010811)	1993-12-01	0.271792	0.845706	1.85989	-0.311688	NET1;DAB2;CCDC80;SDC4;SMOC1;ITGA6;EMP2;RSU1;ITGA5;THBS1;PRKCZ;CYR61
regulation of lipid transport (GO:0032368)	1983-11-01	0.258324	0.845706	1.87826	-0.314766	ABCA1;P2RX4;SCP2;EGF;PTCHD2;CRY1;ITGAV;THBS1;SREBF2;RUNX1;NKX3-1
amide transport (GO:0042886)	1983-11-01	0.258324	0.845706	1.8876	-0.316331	ABCA1;SLC9A3R1;EDN1;SLC46A1;PCLO;ANXA1;EIF2AK3;ABCB9;SELT;CAMK2G;DISP1
reactive oxygen species metabolic process (GO:0072593)	1984-11-01	0.269585	0.845706	1.93493	-0.324263	EDN1;PRDX4;GPX1;BNIP3;MPV17L;CAT;NDUFS4;PDK4;HBA1;CYR61;CTGF
integrin-mediated signaling pathway (GO:0007229)	1984-11-01	0.269585	0.845706	1.98951	-0.33341	VAV3;DAB2;TEC;ADAMTS1;NEDD9;MYH9;ITGA6;ITGAV;ITGA5;FERMT2;CTGF
striated muscle cell development (GO:0055002)	1965-09-01	0.249964	0.845706	2.19793	-0.368337	BIN3;GPX1;HOMER1;LMNA;SMYD3;KIAA1161;PITX2;MYH10;TBX3
adaptive immune response based on somatic recombination of immune receptors built from immunoglobulin superfamily domains (GO:0002460)	1957-08-01	0.257038	0.845706	2.41432	-0.404601	JAG1;CADM1;MSH2;BCL6;LYST;MICA;MYD88;CTSC
cyclic nucleotide metabolic process (GO:0009187)	1958-08-01	0.270662	0.845706	2.62762	-0.440348	CNP;NPR1;PDE4C;GNAS;ADM;PDE7B;PDE8A;MB21D1
camera-type eye development (GO:0043010)	1958-08-01	0.270662	0.845706	2.6511	-0.444282	CDKN1C;TWSG1;RARG;WDR19;TULP3;PITX2;NES;SLC25A25
positive regulation of alpha-beta T cell activation (GO:0046635)	1948-07-01	0.249498	0.845706	2.71053	-0.454242	BLM;PNP;RIPK2;NKAP;AP3B1;PRKCZ;ADA
Rho protein signal transduction (GO:0007266)	1948-07-01	0.249498	0.845706	2.83907	-0.475782	CNKSR1;BCL6;ARHGEF3;EPS8L1;ARHGAP29;CTNNAL1;PHACTR4
regulation of lymphocyte apoptotic process (GO:0070228)	1949-07-01	0.264177	0.845706	2.96183	-0.496355	BLM;CASP8;BCL6;ZC3H8;NFKBID;AURKB;ADA
fatty acid transport (GO:0015908)	1949-07-01	0.264177	0.845706	3.03704	-0.50896	PRKAB2;ANXA1;PNPLA8;PLA2G4A;PLIN2;MFSD2A;PPARD
forelimb morphogenesis (GO:0035136)	1940-06-01	0.254918	0.845706	3.49812	-0.586229	OSR2;MSX2;KIAA1715;HOXD9;TBX3;LRP6
negative regulation of BMP signaling pathway (GO:0030514)	1940-06-01	0.254918	0.845706	3.60706	-0.604485	FZD1;TCF7L2;TWSG1;SMAD6;LEMD3;FBN1
regulation of release of cytochrome c from mitochondria (GO:0090199)	1941-06-01	0.271205	0.845706	3.68497	-0.617542	BCL2L11;GPX1;BIK;BNIP3;LMNA;DNM1L
somitogenesis (GO:0001756)	1941-06-01	0.271205	0.845706	3.72678	-0.624549	HES7;SEMA3C;ABI1;PLXNA2;PSEN1;NKX3-1
regulation of transcription from RNA polymerase II promoter in response to stress (GO:0043618)	1941-06-01	0.271205	0.845706	3.74031	-0.626815	JUN;EGLN3;EPAS1;UBE2D1;HMOX1;KLF2
response to zinc ion (GO:0010043)	1941-06-01	0.271205	0.845706	3.75536	-0.629338	MT2A;SLC30A5;GGH;MT1X;CRIP1;MT1E
collagen fibril organization (GO:0030199)	1941-06-01	0.271205	0.845706	3.86155	-0.647133	P4HA1;COL5A1;COL12A1;CYP1B1;MIA3;LOXL2
positive regulation of nitric oxide biosynthetic process (GO:0045429)	1932-05-01	0.259335	0.845706	4.73321	-0.79321	EDN1;P2RX4;PTGS2;CLU;ICAM1
positive regulation of protein tyrosine kinase activity (GO:0061098)	1932-05-01	0.259335	0.845706	4.75242	-0.796429	EGF;DOK7;ABI1;TGFA;UNC119
regulation of T cell apoptotic process (GO:0070232)	1932-05-01	0.259335	0.845706	4.86155	-0.814718	BLM;CASP8;ZC3H8;NFKBID;ADA
myeloid cell development (GO:0061515)	1932-05-01	0.259335	0.845706	4.9107	-0.822955	BCL6;SLC11A2;ABI1;PTPN6;BPGM
positive regulation of glucose metabolic process (GO:0010907)	1932-05-01	0.259335	0.845706	4.94187	-0.828177	TCF7L2;SMEK1;SORBS1;PPARGC1A;FOXO1
regulation of cellular pH (GO:0030641)	1932-05-01	0.259335	0.845706	4.97273	-0.83335	CLIC4;PPT1;SLC26A6;SLC9A1;CLN5
regulation of cell size (GO:0008361)	1932-05-01	0.259335	0.845706	4.97572	-0.833851	RARG;EDN1;DEPTOR;CLN8;WDTC1
histone ubiquitination (GO:0016574)	1932-05-01	0.259335	0.845706	4.98616	-0.8356	RNF20;CTR9;CDC73;RNF2;SKP1
negative regulation of microtubule polymerization or depolymerization (GO:0031111)	1932-05-01	0.259335	0.845706	5.05046	-0.846376	APC;INPP5J;MID1;AURKB;CLASP2
sulfur compound transport (GO:0072348)	1932-05-01	0.259335	0.845706	5.05355	-0.846893	SLC9A3R1;SLC25A26;SLC26A2;SLC26A6;SLC19A2
ceramide biosynthetic process (GO:0046513)	1932-05-01	0.259335	0.845706	5.17541	-0.867315	CERS6;SPTLC2;SMPD1;GBA;CLN8
endoderm development (GO:0007492)	2016-04-24	0.261512	0.845706	6.75453	-1.13195	EXT1;DAB2;HHEX;ARC
regulation of transcription regulatory region DNA binding (GO:2000677)	2016-04-24	0.261512	0.845706	6.77417	-1.13524	PARP1;MSX2;LHX2;ZNF675
heart valve morphogenesis (GO:0003179)	2016-04-24	0.261512	0.845706	6.78319	-1.13675	NOTCH2;JAG1;SOX4;CYR61
regulation of interferon-gamma-mediated signaling pathway (GO:0060334)	2016-04-24	0.261512	0.845706	6.78735	-1.13745	PTPN1;SOCS1;PTPN6;PIAS1
response to X-ray (GO:0010165)	2016-04-24	0.261512	0.845706	6.79332	-1.13845	BLM;ANXA1;MSH2;BRCA2
regulation of actin cytoskeleton reorganization (GO:2000249)	2016-04-24	0.261512	0.845706	6.82502	-1.14376	BCAS3;ABL2;PHPT1;CD2AP
vascular endothelial growth factor receptor signaling pathway (GO:0048010)	2016-04-24	0.261512	0.845706	6.95454	-1.16547	NRP2;BMPR2;HSPB1;PGF
DNA replication initiation (GO:0006270)	2016-04-24	0.261512	0.845706	7.10792	-1.19117	PRIM2;CCNE2;POLE2;MCM2
negative regulation of muscle cell apoptotic process (GO:0010656)	2016-04-24	0.261512	0.845706	7.22181	-1.21026	EDN1;HMOX1;HMGCR;LRP6
cardiac ventricle morphogenesis (GO:0003208)	2016-04-24	0.261512	0.845706	7.25667	-1.2161	DLL4;JAG1;SEMA3C;SOX4
regulation of epidermal growth factor-activated receptor activity (GO:0007176)	2016-04-24	0.261512	0.845706	7.2583	-1.21637	EGF;TGFA;PSEN1;SNX6
establishment of chromosome localization (GO:0051303)	2016-04-24	0.261512	0.845706	7.30911	-1.22489	CENPE;NDE1;SPICE1;GEM
carbohydrate phosphorylation (GO:0046835)	2016-04-24	0.261512	0.845706	7.5208	-1.26037	PFKFB4;PFKFB3;GALK2;XYLB
positive regulation of Notch signaling pathway (GO:0045747)	2016-04-24	0.261512	0.845706	7.52198	-1.26056	MESP1;TSPAN14;JAG1;HES1
glutamine family amino acid catabolic process (GO:0009065)	2016-04-24	0.261512	0.845706	7.61373	-1.27594	GOT1;ASL;ASRGL1;GLS
glutamate metabolic process (GO:0006536)	2016-04-24	0.261512	0.845706	7.83646	-1.31326	GCLC;GOT1;SLC1A3;GLS
negative regulation of anoikis (GO:2000811)	2016-03-16	0.258198	0.845706	11.0802	-1.85686	PDK4;SNAI2;ITGA5
positive regulation of protein dephosphorylation (GO:0035307)	2016-03-16	0.258198	0.845706	11.1663	-1.8713	SMPD1;GBA;CALM1
erythrocyte development (GO:0048821)	2016-03-16	0.258198	0.845706	11.3085	-1.89512	BCL6;SLC11A2;BPGM
regulation of B cell apoptotic process (GO:0002902)	2016-03-16	0.258198	0.845706	11.4443	-1.91787	BCL6;ADA;AURKB
cAMP catabolic process (GO:0006198)	2016-03-16	0.258198	0.845706	11.4956	-1.92648	PDE4C;PDE7B;PDE8A
mammary gland epithelial cell differentiation (GO:0060644)	2016-03-16	0.258198	0.845706	11.9391	-2.0008	CEBPB;ZNF703;HOXA5
methionine biosynthetic process (GO:0009086)	2016-03-16	0.258198	0.845706	11.9931	-2.00985	GOT1;ADI1;MTR
positive regulation of protein autophosphorylation (GO:0031954)	2016-03-16	0.258198	0.845706	12.0473	-2.01893	RAP2B;NBN;CALM1
preassembly of GPI anchor in ER membrane (GO:0016254)	2016-03-16	0.258198	0.845706	12.0732	-2.02327	PIGA;PIGM;PIGH
female gonad development (GO:0008585)	2016-03-16	0.258198	0.845706	12.1929	-2.04333	ARID5B;BRCA2;PITX2
regulation of mitochondrial membrane permeability involved in apoptotic process (GO:1902108)	2016-03-16	0.258198	0.845706	12.2486	-2.05267	BCL2L11;BNIP3;THEM4
epithelial cell maturation (GO:0002070)	2016-03-16	0.258198	0.845706	12.4141	-2.0804	HOXB13;ESR2;HOXA5
regulation of cellular amide metabolic process (GO:0034248)	2016-03-16	0.258198	0.845706	12.4277	-2.08269	OLFM1;HAP1;CLU
pteridine-containing compound biosynthetic process (GO:0042559)	2016-03-16	0.258198	0.845706	12.4728	-2.09025	QDPR;SPR;GCH1
negative regulation of defense response to virus (GO:0050687)	2016-03-16	0.258198	0.845706	12.8051	-2.14592	PPM1B;TRIM38;MICB
glucose catabolic process (GO:0006007)	2016-03-16	0.258198	0.845706	12.8999	-2.16182	RPIA;HIBADH;PGD
fucose metabolic process (GO:0006004)	2016-03-16	0.258198	0.845706	13.5749	-2.27494	FUT10;FUCA1;FUCA2
positive regulation of hair follicle development (GO:0051798)	2016-02-09	0.273671	0.845706	24.4178	-4.09203	KRT17;MSX2
positive regulation of hair cycle (GO:0042635)	2016-02-09	0.273671	0.845706	24.8142	-4.15846	KRT17;MSX2
lung vasculature development (GO:0060426)	2016-02-09	0.273671	0.845706	25.2519	-4.23181	IFT88;ID1
epithelial to mesenchymal transition involved in endocardial cushion formation (GO:0003198)	2016-02-09	0.273671	0.845706	25.3983	-4.25635	MSX2;SNAI2
positive regulation of cell cycle checkpoint (GO:1901978)	2016-02-09	0.273671	0.845706	25.4871	-4.27123	DYNC1LI1;NDRG1
positive regulation of developmental pigmentation (GO:0048087)	2016-02-09	0.273671	0.845706	25.6868	-4.3047	BLOC1S6;KITLG
regulation of type B pancreatic cell apoptotic process (GO:2000674)	2016-02-09	0.273671	0.845706	25.7271	-4.31144	TCF7L2;WFS1
regulation of pigment cell differentiation (GO:0050932)	2016-02-09	0.273671	0.845706	25.7406	-4.31371	BLOC1S6;KITLG
artery development (GO:0060840)	2016-02-09	0.273671	0.845706	25.7693	-4.31851	BMPR2;NKX3-1
negative regulation of immunoglobulin mediated immune response (GO:0002890)	2016-02-09	0.273671	0.845706	26.1383	-4.38035	BCL6;PTPN6
negative regulation of necroptotic process (GO:0060546)	2016-02-09	0.273671	0.845706	26.2525	-4.3995	CASP8;BIRC3
rRNA methylation (GO:0031167)	2016-02-09	0.273671	0.845706	26.2755	-4.40335	DIMT1;TFB1M
endocardial cushion development (GO:0003197)	2016-02-09	0.273671	0.845706	26.4547	-4.43339	CRELD1;THBS1
negative regulation of B cell mediated immunity (GO:0002713)	2016-02-09	0.273671	0.845706	26.8116	-4.4932	BCL6;PTPN6
poly(A)+ mRNA export from nucleus (GO:0016973)	2016-02-09	0.273671	0.845706	27.0797	-4.53813	NXF1;HHEX
positive regulation of insulin receptor signaling pathway (GO:0046628)	2016-02-09	0.273671	0.845706	27.2602	-4.56837	OSBPL8;PRKCZ
positive regulation of protein homooligomerization (GO:0032464)	2016-02-09	0.273671	0.845706	27.3569	-4.58458	BCL2L11;BIK
negative regulation of cell killing (GO:0031342)	2016-02-09	0.273671	0.845706	27.4193	-4.59503	HLA-A;HLA-E
regulation of T-helper 2 cell differentiation (GO:0045628)	2016-02-09	0.273671	0.845706	27.5133	-4.61079	BCL6;PRKCZ
estrogen biosynthetic process (GO:0006703)	2016-02-09	0.273671	0.845706	27.558	-4.61827	CYP11A1;HSD17B7
heme transport (GO:0015886)	2016-02-09	0.273671	0.845706	27.6693	-4.63692	SLC46A1;ABCB7
serine transport (GO:0032329)	2016-02-09	0.273671	0.845706	27.7443	-4.64951	NFKBIE;SERINC5
fat-soluble vitamin biosynthetic process (GO:0042362)	2016-02-09	0.273671	0.845706	27.9735	-4.6879	CYP2R1;PLTP
signal peptide processing (GO:0006465)	2016-02-09	0.273671	0.845706	27.9816	-4.68927	PCSK5;CLN5
peptidyl-threonine dephosphorylation (GO:0035970)	2016-02-09	0.273671	0.845706	28.088	-4.7071	PPM1B;PDP2
DNA double-strand break processing (GO:0000729)	2016-02-09	0.273671	0.845706	28.0915	-4.70768	BLM;SLX4
hepatocyte apoptotic process (GO:0097284)	2016-02-09	0.273671	0.845706	28.1078	-4.71041	CASP8;KRT8
NIK/NF-kappaB signaling (GO:0038061)	2016-02-09	0.273671	0.845706	28.1755	-4.72177	IKBKE;BIRC3
negative regulation of leukocyte mediated cytotoxicity (GO:0001911)	2016-02-09	0.273671	0.845706	28.1951	-4.72505	HLA-A;HLA-E
negative regulation of homotypic cell-cell adhesion (GO:0034111)	2016-02-09	0.273671	0.845706	28.2882	-4.74065	UBASH3B;ZNF703
regulation of oxidative phosphorylation (GO:0002082)	2016-02-09	0.273671	0.845706	28.3814	-4.75627	MLXIPL;UQCC2
L-methionine biosynthetic process from methylthioadenosine (GO:0019509)	2016-02-09	0.273671	0.845706	28.4231	-4.76326	GOT1;ADI1
response to gravity (GO:0009629)	2016-02-09	0.273671	0.845706	28.4242	-4.76344	FOSL1;FOS
primitive streak formation (GO:0090009)	2016-02-09	0.273671	0.845706	28.6092	-4.79445	HHEX;LRP6
protein localization to kinetochore (GO:0034501)	2016-02-09	0.273671	0.845706	28.6715	-4.80488	CASC5;AURKB
auditory receptor cell differentiation (GO:0042491)	2016-02-09	0.273671	0.845706	28.7196	-4.81295	JAG1;MYO6
2'-deoxyribonucleotide biosynthetic process (GO:0009265)	2016-02-09	0.273671	0.845706	28.8079	-4.82773	DTYMK;ADK
leukocyte aggregation (GO:0070486)	2016-02-09	0.273671	0.845706	28.8495	-4.83471	STK10;CD44
phagocytosis, recognition (GO:0006910)	2016-02-09	0.273671	0.845706	28.8662	-4.83751	SCARB1;MFGE8
mitochondrial fragmentation involved in apoptotic process (GO:0043653)	2016-02-09	0.273671	0.845706	28.8977	-4.84278	BNIP3;DNM1L
aminoglycoside antibiotic metabolic process (GO:0030647)	2016-02-09	0.273671	0.845706	28.916	-4.84586	AKR1C1;AKR1B1
deoxyribose phosphate biosynthetic process (GO:0046385)	2016-02-09	0.273671	0.845706	28.9275	-4.84779	DTYMK;ADK
negative regulation of catenin import into nucleus (GO:0035414)	2016-02-09	0.273671	0.845706	28.9574	-4.8528	FZD1;SNAI2
adhesion of symbiont to host (GO:0044406)	2016-02-09	0.273671	0.845706	29.2021	-4.8938	SCARB1;ICAM1
deoxyribonucleoside monophosphate metabolic process (GO:0009162)	2016-02-09	0.273671	0.845706	29.3637	-4.92088	NT5M;DCK
pyrimidine nucleotide catabolic process (GO:0006244)	2016-02-09	0.273671	0.845706	29.4394	-4.93357	NT5M;CCNO
positive regulation of mitochondrial membrane permeability involved in apoptotic process (GO:1902110)	2016-02-09	0.273671	0.845706	29.5558	-4.95308	BCL2L11;BNIP3
endosome to pigment granule transport (GO:0043485)	2016-02-09	0.273671	0.845706	29.557	-4.95327	RAB32;BLOC1S6
cytoplasmic mRNA processing body assembly (GO:0033962)	2016-02-09	0.273671	0.845706	29.6456	-4.96813	DYNC1H1;CCRN4L
endosome to melanosome transport (GO:0035646)	2016-02-09	0.273671	0.845706	29.776	-4.98998	RAB32;BLOC1S6
mitochondrial outer membrane permeabilization involved in programmed cell death (GO:1902686)	2016-02-09	0.273671	0.845706	30.0211	-5.03105	BCL2L11;BNIP3
positive regulation of osteoblast proliferation (GO:0033690)	2016-02-09	0.273671	0.845706	30.2806	-5.07454	ITGAV;CYR61
L-amino acid import (GO:0043092)	2016-02-09	0.273671	0.845706	31.8508	-5.33769	SLC1A3;CLN8
GDP-mannose metabolic process (GO:0019673)	2016-02-09	0.273671	0.845706	32.6512	-5.47181	PMM1;MPI
negative regulation of translation involved in gene silencing by miRNA (GO:0035278)	2016-02-09	0.273671	0.845706	32.8748	-5.50929	AGO3;AGO1
positive regulation of mitochondrial fission (GO:0090141)	2016-02-09	0.273671	0.845706	33.2967	-5.58	BNIP3;DNM1L
negative regulation of translation, ncRNA-mediated (GO:0040033)	2016-02-09	0.273671	0.845706	33.6568	-5.64033	AGO3;AGO1
regulation of translation, ncRNA-mediated (GO:0045974)	2016-02-09	0.273671	0.845706	34.1184	-5.71769	AGO3;AGO1
regulation of hormone levels (GO:0010817)	27/229	0.277065	0.848072	1.41269	-0.232798	SCARB1;ERO1LB;AKR1B1;ADM;IDE;HSD17B11;HSD17B7;PCSK5;SULT1A1;PCLO;SCP2;CYP11A1;CYP1B1;CAMK2G;PPARGC1A;EDN1;STARD5;ANXA1;DGAT1;AKR1C1;SRD5A3;EIF2AK3;DIO3;TBX3;ALDH1A3;SELM;SELT
positive regulation of protein serine/threonine kinase activity (GO:0071902)	30/257	0.280223	0.848072	1.43443	-0.236379	PRKAA1;CHRNA7;DUSP19;CXCR4;TGFA;NOD1;MST1R;PSEN1;THBS1;IRAK2;S1PR2;MAP3K6;MAP3K4;MAP2K3;EDN1;MAP3K1;GADD45B;GADD45A;RIPK2;EGF;GAB1;ATP2B4;PARP16;DAB2;KITLG;MDFIC;TAOK3;CSPG4;TAB1;CALM1
embryo development ending in birth or egg hatching (GO:0009792)	27/230	0.284019	0.848072	1.46536	-0.241477	NOTCH2;CCNB2;HHEX;BCL2L11;MAN2A1;KIF3A;TCTN1;PITX2;MYH10;WDTC1;STIL;EDN1;DUSP3;ENDOG;KIDINS220;WDR19;TBX3;KLF2;RUNX1;FOSL1;MYO1E;DAB2;MSH2;MAFF;MYH9;TAB1;DSC3
signal transduction by phosphorylation (GO:0023014)	24/202	0.28014	0.848072	1.50844	-0.248576	MAP2K3;PTGER4;DUSP4;JUN;BMPR2;DUSP3;EGF;RIPK2;DUSP19;PPP2R5D;NOD1;FOS;DUSP6;STK10;RPS6KA5;DUSP10;TAOK3;IRAK2;ITGAV;TAB1;TRIB1;MAP3K4;MYD88;CNTLN
regulation of myeloid cell differentiation (GO:0045637)	19/156	0.275596	0.848072	1.52478	-0.251268	L3MBTL1;JUN;JAG1;CTR9;PIK3R1;FOS;FOXO3;ETS1;CDC73;RUNX1;KITLG;MAFB;CASP8;SCIN;APC;ASXL2;GNAS;ZNF675;HOXA5
negative regulation of response to wounding (GO:1903035)	17/138	0.27584	0.848072	1.59395	-0.262667	PTGER4;EDN1;GPX1;ANXA1;CHRNA7;GBA;SERPINE1;PLAUR;PLAT;HMGCR;UACA;RABGEF1;DUSP10;UBASH3B;ADA;PPARD;CD276
regulation of cell shape (GO:0008360)	14/112	0.28449	0.848072	1.92636	-0.317445	TBCCD1;MYO10;HEXB;PARVA;ARAP1;ICAM1;FMNL3;EPS8;STRIP2;BAMBI;CDC42EP2;MYH9;MYH10;FERMT2
regulation of mitosis (GO:0007088)	14/112	0.28449	0.848072	1.96952	-0.324557	L3MBTL1;EDN1;EGF;UBE2D1;TGFA;TERF1;CDC25C;CENPE;ESPL1;APC;ANAPC4;NEK2;ANAPC5;MAD1L1
positive regulation of mitotic cell cycle (GO:0045931)	13/103	0.283793	0.848072	1.99158	-0.328193	EDN1;DUSP3;ANXA1;EGF;TGFA;DBF4B;BRCA2;TERF1;CDC25B;DYNC1LI1;ESPL1;HES1;NKX3-1
neutral lipid metabolic process (GO:0006638)	1994-12-01	0.282669	0.848072	2.07199	-0.341444	GPX1;GK;DGAT1;ELOVL4;INSIG1;TECR;CAT;PNPLA3;LPL;ABHD5;ELOVL7;AGPAT4
regulation of coagulation (GO:0050818)	1985-11-01	0.281	0.848072	2.24957	-0.370707	EDN1;TEC;UBASH3B;ANXA4;FAM46A;SERPINE1;PLAUR;PLAT;PSEN1;THBS1;USF1
neural tube closure (GO:0001843)	1976-10-01	0.27862	0.848072	2.32813	-0.383654	VASP;RARG;STIL;LHX2;LMO4;TULP3;ALX1;ADM;PHACTR4;LRP6
aminoglycan catabolic process (GO:0006026)	1967-09-01	0.275292	0.848072	2.56526	-0.422729	SDC4;HEXB;SDC2;FUCA1;IDS;CSPG4;GNS;CD44;SLC9A1
chondroitin sulfate metabolic process (GO:0030204)	1959-08-01	0.284484	0.848072	3.05605	-0.503607	SLC35D1;SDC4;HEXB;SDC2;MAMDC2;IDS;CSPG4;B4GALT7
epithelial to mesenchymal transition (GO:0001837)	1950-07-01	0.279087	0.848072	3.15433	-0.519802	TGFBR3;MSX2;SNAI1;SNAI2;S100A4;LOXL2;LRP6
response to progesterone (GO:0032570)	1933-05-01	0.277749	0.848072	4.90826	-0.808834	FOSL1;FOSB;TXNIP;FOS;THBS1
cardiac cell development (GO:0055006)	1933-05-01	0.277749	0.848072	5.09549	-0.839687	JAG1;LMNA;PITX2;MYH10;TBX3
protein-lipid complex subunit organization (GO:0071825)	1933-05-01	0.277749	0.848072	5.15505	-0.849502	ABCA1;SCARB1;DGAT1;ABCA5;LPL
regulation of insulin secretion involved in cellular response to glucose stimulus (GO:0061178)	1933-05-01	0.277749	0.848072	5.17431	-0.852676	TCF7L2;UCP2;NR1D1;HMGCR;PHPT1
lamellipodium assembly (GO:0030032)	1933-05-01	0.277749	0.848072	5.23257	-0.862276	VAV3;CCDC88A;ABLIM1;SPATA13;VCL
DNA strand elongation involved in DNA replication (GO:0006271)	1933-05-01	0.277749	0.848072	5.44302	-0.896956	PRIM2;GINS2;GINS4;RPA2;MCM2
pyrimidine nucleotide biosynthetic process (GO:0006221)	1933-05-01	0.277749	0.848072	5.47205	-0.90174	PRPS1;DTYMK;RP2;UPRT;DHODH
negative regulation of peptidyl-tyrosine phosphorylation (GO:0050732)	1933-05-01	0.277749	0.848072	5.47696	-0.90255	SOCS1;PTPN6;PSEN1;PRKCZ;SNX6
cardiac septum development (GO:0003279)	2016-04-25	0.282945	0.848072	7.15845	-1.17964	LMO4;HES1;CRELD1;CYR61
regulation of response to interferon-gamma (GO:0060330)	2016-04-25	0.282945	0.848072	7.27537	-1.19891	PTPN1;SOCS1;PTPN6;PIAS1
positive regulation of smooth muscle contraction (GO:0045987)	2016-04-25	0.282945	0.848072	7.37335	-1.21506	EDN1;EDN2;PTGS2;ADA
cellular response to vascular endothelial growth factor stimulus (GO:0035924)	2016-04-25	0.282945	0.848072	7.51511	-1.23842	DLL4;NR4A1;NRP2;HSPB1
negative regulation of lymphocyte mediated immunity (GO:0002707)	2016-04-25	0.282945	0.848072	7.53798	-1.24218	BCL6;PTPN6;HLA-A;HLA-E
negative regulation of signal transduction by p53 class mediator (GO:1901797)	2016-04-25	0.282945	0.848072	7.68533	-1.26647	SNAI1;SNAI2;TAF9B;CD44
columnar/cuboidal epithelial cell development (GO:0002066)	2016-04-25	0.282945	0.848072	7.69598	-1.26822	RARG;KLF5;PRDM1;BMP5
peroxisome organization (GO:0007031)	2016-04-25	0.282945	0.848072	7.7042	-1.26958	PEX19;ABCD3;SCP2;RAB8B
alditol metabolic process (GO:0019400)	2016-04-25	0.282945	0.848072	7.84535	-1.29284	GK5;COQ3;GK;GOT1
melanosome localization (GO:0032400)	2016-04-25	0.282945	0.848072	7.86041	-1.29532	BBS2;BLOC1S6;VPS33A;BBS7
release of cytochrome c from mitochondria (GO:0001836)	2016-04-25	0.282945	0.848072	7.8646	-1.29601	JUN;IFI6;DNM1L;CLU
actin filament polymerization (GO:0030041)	2016-04-25	0.282945	0.848072	7.99239	-1.31707	DIAPH2;MICALL2;CORO7;MSRB1
positive regulation of peptidyl-threonine phosphorylation (GO:0010800)	2016-03-17	0.284449	0.848072	11.3071	-1.86329	RIPK2;EGF;CALM1
regulation of cell fate specification (GO:0042659)	2016-03-17	0.284449	0.848072	12.1833	-2.00769	MESP1;LMO4;DUSP6
response to interferon-alpha (GO:0035455)	2016-03-17	0.284449	0.848072	12.2437	-2.01764	IFNAR2;IFITM1;KLHL20
regulation of steroid hormone secretion (GO:2000831)	2016-03-17	0.284449	0.848072	12.2594	-2.02023	CRY1;RUNX1;NKX3-1
oocyte maturation (GO:0001556)	2016-03-17	0.284449	0.848072	12.3541	-2.03584	FOXO3;BRCA2;CDC25B
mitotic G2/M transition checkpoint (GO:0044818)	2016-03-17	0.284449	0.848072	12.4888	-2.05804	BLM;TAOK3;NBN
negative regulation of viral entry into host cell (GO:0046597)	2016-03-17	0.284449	0.848072	12.554	-2.06878	IFITM1;TRIM5;TRIM59
amino-acid betaine metabolic process (GO:0006577)	2016-03-17	0.284449	0.848072	12.5667	-2.07086	POR;SHMT1;ALDH7A1
pseudouridine synthesis (GO:0001522)	2016-03-17	0.284449	0.848072	12.6664	-2.08729	PUS3;RPUSD3;PUS7
fatty acid derivative transport (GO:1901571)	2016-03-17	0.284449	0.848072	12.8177	-2.11223	ANXA1;PNPLA8;PLA2G4A
myoblast fusion (GO:0007520)	2016-03-17	0.284449	0.848072	12.8223	-2.11298	CAPN2;MYH9;PITX2
establishment of mitotic spindle orientation (GO:0000132)	2016-03-17	0.284449	0.848072	12.8844	-2.12322	GPSM2;NDE1;CDK5RAP2
icosanoid transport (GO:0071715)	2016-03-17	0.284449	0.848072	12.8855	-2.1234	ANXA1;PNPLA8;PLA2G4A
azole transport (GO:0045117)	2016-03-17	0.284449	0.848072	12.8991	-2.12565	EDN1;ADA;SLC19A2
phosphatidylinositol dephosphorylation (GO:0046856)	2016-03-17	0.284449	0.848072	12.915	-2.12826	MTMR3;INPP5J;SYNJ2
metaphase plate congression (GO:0051310)	2016-03-17	0.284449	0.848072	13.1266	-2.16313	CENPE;SPICE1;GEM
vitamin biosynthetic process (GO:0009110)	2016-03-17	0.284449	0.848072	13.2509	-2.18362	MMAA;CYP2R1;PLTP
long-chain fatty-acyl-CoA biosynthetic process (GO:0035338)	2016-03-17	0.284449	0.848072	13.3321	-2.197	ELOVL4;TECR;ELOVL7
regulation of vesicle fusion (GO:0031338)	2016-03-17	0.284449	0.848072	13.841	-2.28086	C2CD5;ANXA1;STXBP1
cellular response to hormone stimulus (GO:0032870)	52/462	0.284928	0.848266	1.47988	-0.243532	C2CD5;RARG;TCIRG1;IDE;AACS;SLC2A8;CTSL;PDK4;CTSB;NKX3-1;BCAS3;PRKAB2;ANXA1;PARP1;HMGCS1;MSX2;GAB1;FOS;PGF;LATS1;AR;POR;ATP6V1B2;PPARD;PRKAA1;PIK3R1;ADIPOR2;PRKCZ;FOXO1;CYP11A1;ZNF703;UCP2;THEM4;SMYD3;PPARGC1A;WDTC1;BBS2;PTPN1;GOT1;VDR;AKR1C1;SORBS1;NR1D1;FBXO32;GNG11;USF1;ESR2;NR4A2;NR4A1;NR4A3;GNAS;FOSB
embryonic organ morphogenesis (GO:0048562)	15/121	0.284849	0.848266	1.82651	-0.300573	TCF7L2;OSR2;RARG;EIF4A3;WDR19;SIX1;VAX2;LRP6;ALDH1A3;ASXL2;GNAS;ALX1;PITX2;HOXD9;HOXA5
ncRNA metabolic process (GO:0034660)	38/332	0.286961	0.853204	1.40358	-0.222829	TDRKH;AARS2;TP53RK;TARSL2;GEMIN2;URM1;EIF4A3;TRMT2B;TFB1M;YARS2;RPF1;THG1L;DEDD2;ALKBH8;NARS2;TYW1;UTP20;PUS3;DIMT1;ELAC2;RPP40;INTS2;TYW1B;CDKAL1;PUS7;NPM3;QTRT1;ISG20;LARS2;RPP21;GEMIN5;INTS4;TRMT11;NOL11;RPP25;EEF1E1;INTS8;MPHOSPH6
GTP metabolic process (GO:0046039)	30/258	0.286822	0.853204	1.45424	-0.23087	RAB5B;ATL2;RASL11A;RND3;RND1;GNAI2;TUBB6;RASD1;MFN1;MFN2;RAB28;NUDT15;DNM1L;ADSS;RAB8B;EEFSEC;GCH1;TBCC;GTPBP8;TUBB4B;GNG11;GEM;RAB32;ARL4D;TUBB2A;EHD4;RAP2B;RP2;GNAS;RHEBL1
calcium ion transport into cytosol (GO:0060402)	1942-06-01	0.287735	0.853832	4.17057	-0.65904	DDIT3;ATP2B4;MCOLN1;JPH1;TPCN2;ERO1L
cholesterol transport (GO:0030301)	1942-06-01	0.287735	0.853832	4.19473	-0.662858	ABCA1;SCARB1;STX12;ABCA5;AKR1C1;CLU
sterol transport (GO:0015918)	1942-06-01	0.287735	0.853832	4.20582	-0.66461	ABCA1;SCARB1;STX12;ABCA5;AKR1C1;CLU
guanosine-containing compound metabolic process (GO:1901068)	31/269	0.298506	0.857967	1.50685	-0.230834	RAB5B;ATL2;RASL11A;RND3;RND1;GNAI2;TUBB6;RASD1;MFN1;MFN2;RAB28;NUDT15;DNM1L;ADSS;RAB8B;EEFSEC;GCH1;TBCC;GTPBP8;TUBB4B;GNG11;GEM;RAB32;ARL4D;TUBB2A;EHD4;RAP2B;IMPDH1;RP2;GNAS;RHEBL1
regulation of homeostatic process (GO:0032844)	36/314	0.290214	0.857967	1.52346	-0.233378	PIF1;PRKAA1;NPR1;IFI6;HMGCR;FOXO3;PTGS2;ETS1;FOXO1;ERO1L;LRP6;UBASH3B;UCP2;PDK4;PPARGC1A;HOXA5;TCF7L2;EDN1;ANXA1;SLC30A3;ARRDC3;NR1D1;TERF1;MCOLN1;TPCN2;SREBF2;MLXIPL;KITLG;GCLC;P2RX4;MAFB;DDIT3;PTPN6;CALM1;PHPT1;ADA
ncRNA processing (GO:0034470)	28/241	0.296574	0.857967	1.55882	-0.238795	TP53RK;URM1;EIF4A3;TRMT2B;TFB1M;RPF1;ALKBH8;THG1L;TYW1;UTP20;PUS3;DIMT1;ELAC2;RPP40;INTS2;TYW1B;CDKAL1;NPM3;PUS7;QTRT1;ISG20;RPP21;INTS4;NOL11;TRMT11;RPP25;INTS8;MPHOSPH6
response to virus (GO:0009615)	29/250	0.295027	0.857967	1.57798	-0.241729	IFITM1;CXCR4;HSPB1;ZC3HAV1;MST1R;DDX60;SAMHD1;LYST;CLU;ICAM1;OASL;BCL2L11;TRIM5;ITGAV;PIM2;MICA;MB21D1;IFNAR2;APOBEC3C;BNIP3;STAT2;DNAJC3;FOSL1;ISG20;IRF1;POLR3E;MYD88;XPR1;APOBEC3B
heart development (GO:0007507)	20/167	0.291679	0.857967	1.63928	-0.251119	EDN1;NRP2;GAB1;ADM;PCSK5;CRIP1;ADIPOR2;CASP8;TFDP2;KIF3A;ASXL2;ID1;ID3;BBS7;MYH10;SOX4;PPARD;CDKL1;NKX3-1;FBN1
carboxylic acid transport (GO:0046942)	26/224	0.306944	0.857967	1.66059	-0.254384	SLC46A1;SLC35D1;STXBP1;SLC1A3;PSEN1;CLN8;GLS;SLC25A26;SLC9A3R1;MPC1;MYO6;SLC16A7;SLC38A9;SLC19A2;MFSD2A;PRKAB2;ANXA1;PNPLA8;AKR1C1;PLA2G4A;PLIN2;NFKBIE;SFXN5;SLC26A6;SERINC5;PPARD
calcium ion transport (GO:0006816)	25/215	0.308633	0.857967	1.67587	-0.256725	MCUR1;CHRNA7;ITPR2;PSEN1;JPH1;ERO1L;CTGF;PANX1;ITGAV;CAMK2G;SLC25A25;VDR;CACFD1;CACNA2D1;ATP2B4;MCOLN1;SLC8B1;MCOLN2;TPCN2;P2RX4;STIM1;DDIT3;SELK;MICU2;MICU1
positive regulation of apoptotic signaling pathway (GO:2001235)	20/168	0.300018	0.857967	1.67781	-0.257022	SH3GLB1;WWOX;STEAP3;TNFRSF12A;CRADD;BIK;BNIP3;SIAH1;THBS1;CLU;DEDD2;SLC9A3R1;BCL2L11;CASP8;YWHAQ;PEA15;DNM1L;CTSC;RAD9A;NKX3-1
energy reserve metabolic process (GO:0006112)	19/158	0.292517	0.857967	1.69393	-0.259492	TCF7L2;PRKAB2;GFPT2;STXBP1;ITPR2;PHKA1;PPP2R5D;PYGL;NR1D1;PHKA2;GNG11;PGM2L1;MLXIPL;PPP1R3C;PPP1R3E;GNAS;PGM2;CALM1;GYG1
small GTPase mediated signal transduction (GO:0007264)	49/439	0.310978	0.857967	1.69917	-0.260294	CDKN1A;FAM13A;RASL11A;RND3;RND1;EPS8;RASSF1;OPHN1;YWHAQ;RAB8B;PHACTR4;VAV3;ARL15;ARHGEF17;ARL2-SNX15;ARAP1;GMIP;GEM;RAB32;ARL4D;CNKSR1;DEPDC1B;RAP2B;ARHGEF3;RHOV;RAB5B;ARHGAP19;ARHGAP18;RHOBTB1;ARL17A;SDCBP;RASD1;ARL13B;EPS8L1;HMOX1;RSU1;RAB28;CTNNAL1;STARD13;PLK2;CEP152;ARHGAP29;ARHGAP24;NET1;RABIF;BCL6;IFT27;RGL3;RHEBL1
purine nucleotide biosynthetic process (GO:0006164)	16/132	0.303767	0.857967	1.78888	-0.274037	PRPS2;PRPS1;SLC26A2;ACOT7;PANK3;NPR1;AK1;ADK;ADM;PAPSS2;PAPSS1;IMPDH1;RP2;GNAS;ADSS;ADA
kidney development (GO:0001822)	15/122	0.294563	0.857967	1.89253	-0.289916	CDKN1C;OSR2;WFS1;C1GALT1;SIX1;ARID5B;PCSK5;IFT88;BCL2L11;APC;ADAMTS1;KIF3A;ID3;NKX3-1;FBN1
peptide metabolic process (GO:0006518)	14/113	0.294588	0.857967	1.99982	-0.306351	GSTM4;GSTK1;GPX1;GSTM1;ERO1LB;GSTT1;IDE;PSEN1;PCSK5;CLN5;GCLC;GSTA4;ETHE1;LTA4H
isoprenoid metabolic process (GO:0006720)	14/114	0.30479	0.857967	2.08339	-0.319152	IDI1;DGAT1;SDC4;HMGCS1;SDC2;AKR1C1;SRD5A3;LPL;HMGCR;ALDH1A3;CYP1B1;PDSS2;ISPD;PPARD
negative regulation of intracellular transport (GO:0032387)	13/104	0.294318	0.857967	2.11219	-0.323564	FZD1;INSIG1;MPV17L;TONSL;UACA;RABGEF1;PPM1B;MDFIC;SNAI2;HMOX1;TRIM15;NFKBIE;SOX4
negative regulation of cellular response to growth factor stimulus (GO:0090288)	13/104	0.294318	0.857967	2.1343	-0.326951	TCF7L2;PTPN1;HSPA5;LEMD3;SMAD6;THBS1;GLG1;VASN;TGFBR3;HHEX;BAMBI;SNX6;FBN1
purine nucleoside biosynthetic process (GO:0042451)	1995-12-01	0.293676	0.857967	2.17859	-0.333736	PRPS2;SLC26A2;ACOT7;PANK3;IMPDH1;RP2;AK1;ADK;ADSS;ADA;PAPSS2;PAPSS1
purine ribonucleoside biosynthetic process (GO:0046129)	1995-12-01	0.293676	0.857967	2.18098	-0.334103	PRPS2;SLC26A2;ACOT7;PANK3;IMPDH1;RP2;AK1;ADK;ADSS;ADA;PAPSS2;PAPSS1
lipid homeostasis (GO:0055088)	1996-12-01	0.304803	0.857967	2.27366	-0.3483	ABCA1;SCARB1;MLXIPL;PRKAA1;GOT1;PTCHD2;AKR1C1;LPL;FITM2;ANGPTL4;LYST;USF1
long-chain fatty acid metabolic process (GO:0001676)	1986-11-01	0.292556	0.857967	2.34186	-0.358747	CBR1;ACOT7;GPX1;SCP2;PNPLA8;CYP1B1;ACOT1;PLA2G4A;LTA4H;PTGS2;PTGES
response to amino acid (GO:0043200)	1986-11-01	0.292556	0.857967	2.36326	-0.362026	EDN1;CEBPB;SOCS1;GPX1;OGG1;CAPN2;PPARGC1A;ICAM1;CPEB4;CTGF;LRP6
tube closure (GO:0060606)	1977-10-01	0.29081	0.857967	2.45017	-0.375339	VASP;RARG;STIL;LHX2;LMO4;TULP3;ALX1;ADM;PHACTR4;LRP6
positive regulation of protein kinase B signaling (GO:0051897)	1978-10-01	0.303142	0.857967	2.54753	-0.390254	OSBPL8;TCF7L2;GPX1;IGFBP5;GCNT2;RICTOR;MST1R;KIAA1161;THBS1;HBEGF
positive regulation of protein polymerization (GO:0032273)	1969-09-01	0.301315	0.857967	2.87037	-0.43971	VASP;RGS2;MAP3K1;SCIN;APC;CDC42EP2;RICTOR;TERF1;ICAM1
activation of MAPKK activity (GO:0000186)	1960-08-01	0.298481	0.857967	3.02633	-0.4636	MAP3K1;GADD45B;EGF;KIDINS220;PSEN1;MAP3K6;MAP3K4;GNAI2
regulation of sodium ion transport (GO:0002028)	1960-08-01	0.298481	0.857967	3.02997	-0.464158	SLC9A3R1;PER1;P2RX4;CNKSR3;ATP2B4;GLRX;ATP1B2;ADRB2
regulation of glucose import (GO:0046324)	1951-07-01	0.2942	0.857967	3.36656	-0.515721	PRKAA1;PEA15;CREBL2;SORBS1;PIK3R1;ADIPOR2;PRKCZ
unsaturated fatty acid biosynthetic process (GO:0006636)	1951-07-01	0.2942	0.857967	3.44079	-0.527091	FADS3;EDN1;EDN2;PNPLA8;LTA4H;PTGS2;PTGES
organ regeneration (GO:0031100)	1951-07-01	0.2942	0.857967	3.47393	-0.532168	PRPS2;TGFBR3;CDKN1A;UCP2;ALDOC;ADM;PGF
regulation of vasoconstriction (GO:0019229)	1952-07-01	0.309487	0.857967	3.51472	-0.538417	EDN1;HRH1;EDN2;BMPR2;ADM;PTGS2;ICAM1
regulation of pH (GO:0006885)	1952-07-01	0.309487	0.857967	3.54619	-0.543238	EDN1;CLIC4;PPT1;PDK4;SLC26A6;SLC9A1;CLN5
negative regulation of proteasomal ubiquitin-dependent protein catabolic process (GO:0032435)	1952-07-01	0.309487	0.857967	3.58314	-0.548897	APC;UBE2D1;ANAPC4;ANAPC5;TERF1;SVIP;MAD1L1
positive regulation of transporter activity (GO:0032411)	1952-07-01	0.309487	0.857967	3.59554	-0.550798	STIM1;CNKSR3;GLRX;ATP1B2;HAP1;CALM1;SGK1
cerebral cortex development (GO:0021987)	1943-06-01	0.304468	0.857967	4.08947	-0.626462	BBS2;TFAP2C;LHX2;NDE1;CEP120;LRP6
cytoplasmic pattern recognition receptor signaling pathway (GO:0002753)	1934-05-01	0.296414	0.857967	5.70831	-0.874451	CASP8;RIPK2;IRAK2;NOD1;TAB1
phosphatidylinositol phosphorylation (GO:0046854)	1934-05-01	0.296414	0.857967	5.76874	-0.883708	PI4K2B;IMPA1;BPNT1;PIK3R1;PIP4K2C
positive regulation of embryonic development (GO:0040019)	2016-04-26	0.304625	0.857967	7.31613	-1.12075	OSR2;RBM19;SIX1;HES1
positive regulation of coagulation (GO:0050820)	2016-04-26	0.304625	0.857967	7.37431	-1.12966	SERPINE1;PSEN1;THBS1;USF1
regulation of odontogenesis (GO:0042481)	2016-04-26	0.304625	0.857967	7.3759	-1.12991	IFT88;EDN1;APC;SP6
embryonic epithelial tube formation (GO:0001838)	2016-04-26	0.304625	0.857967	7.48315	-1.14634	CASP8;TCTN1;SIX1;SOX4
regulation of oligodendrocyte differentiation (GO:0048713)	2016-04-26	0.304625	0.857967	7.59243	-1.16308	TCF7L2;CXCR4;HES1;TNFRSF21
negative regulation of insulin receptor signaling pathway (GO:0046627)	2016-04-26	0.304625	0.857967	7.65022	-1.17193	PTPN1;ANKRD26;SOCS1;PRKCZ
positive regulation of release of cytochrome c from mitochondria (GO:0090200)	2016-04-26	0.304625	0.857967	7.7257	-1.18349	BCL2L11;BIK;BNIP3;DNM1L
regulation of the force of heart contraction (GO:0002026)	2016-04-26	0.304625	0.857967	7.74689	-1.18674	EDN2;ATP2B4;ADM;SLC9A1
hippo signaling (GO:0035329)	2016-04-26	0.304625	0.857967	7.83874	-1.20081	LATS1;TJP1;SAV1;TJP2
pigment granule localization (GO:0051875)	2016-04-26	0.304625	0.857967	8.00705	-1.22659	BBS2;BLOC1S6;VPS33A;BBS7
negative regulation of T cell differentiation (GO:0045581)	2016-04-26	0.304625	0.857967	8.13997	-1.24696	BCL6;IRF1;ZC3H8;NFKBID
GPI anchor metabolic process (GO:0006505)	2016-04-26	0.304625	0.857967	8.20472	-1.25687	PIGU;PGAP1;PIGA;PIGH
ventricular septum development (GO:0003281)	2016-03-18	0.3109	0.857967	12.2349	-1.87425	LMO4;HES1;CYR61
cellular response to interleukin-6 (GO:0071354)	2016-03-18	0.3109	0.857967	12.3038	-1.8848	GALT;CTR9;GAB1
regulation of synaptic transmission, dopaminergic (GO:0032225)	2016-03-18	0.3109	0.857967	12.4224	-1.90298	TOR1A;CHRNA7;PTGS2
ERK1 and ERK2 cascade (GO:0070371)	2016-03-18	0.3109	0.857967	12.4309	-1.90427	PTGER4;EGF;ITGAV
mammary gland alveolus development (GO:0060749)	2016-03-18	0.3109	0.857967	12.6043	-1.93084	EGF;TGFA;HOXA5
aorta morphogenesis (GO:0035909)	2016-03-18	0.3109	0.857967	12.9592	-1.98521	DLL4;JAG1;SIX1
glutamate secretion (GO:0014047)	2016-03-18	0.3109	0.857967	13.0203	-1.99458	STXBP1;MYO6;GLS
fibrinolysis (GO:0042730)	2016-03-18	0.3109	0.857967	13.1088	-2.00813	SERPINE1;PLAUR;PLAT
regulation of intrinsic apoptotic signaling pathway by p53 class mediator (GO:1902253)	2016-03-18	0.3109	0.857967	13.1806	-2.01913	STEAP3;TAF9B;CD44
negative regulation of fatty acid metabolic process (GO:0045922)	2016-03-18	0.3109	0.857967	13.2166	-2.02463	INSIG1;PLIN5;WDTC1
glycine metabolic process (GO:0006544)	2016-03-18	0.3109	0.857967	13.2704	-2.03289	PDPR;SHMT1;GCAT
SCF-dependent proteasomal ubiquitin-dependent protein catabolic process (GO:0031146)	2016-03-18	0.3109	0.857967	13.3148	-2.03968	FBXO4;BTRC;SKP1
negative regulation of translational initiation (GO:0045947)	2016-03-18	0.3109	0.857967	13.3323	-2.04236	EIF2B3;PAIP2B;EIF2AK3
intrinsic apoptotic signaling pathway in response to oxidative stress (GO:0008631)	2016-03-18	0.3109	0.857967	13.4817	-2.06525	GPX1;CYP1B1;UACA
nucleobase-containing small molecule interconversion (GO:0015949)	2016-03-18	0.3109	0.857967	13.5558	-2.0766	DTYMK;AK1;GLRX
cellular response to gonadotropin stimulus (GO:0071371)	2016-03-18	0.3109	0.857967	13.6251	-2.08722	POR;HMGCS1;CYP11A1
inner ear receptor stereocilium organization (GO:0060122)	2016-03-18	0.3109	0.857967	13.6656	-2.09343	IFT88;KIF3A;DFNB31
telencephalon development (GO:0021537)	2016-03-18	0.3109	0.857967	13.724	-2.10237	IFT88;TCTN1;HES1
entrainment of circadian clock by photoperiod (GO:0043153)	2016-03-18	0.3109	0.857967	13.725	-2.10252	PER1;CRY1;RBM4B
positive regulation of viral genome replication (GO:0045070)	2016-03-18	0.3109	0.857967	13.7636	-2.10843	SRPK2;YTHDC2;TRIM38
mannosylation (GO:0097502)	2016-03-18	0.3109	0.857967	14.4298	-2.21049	PIGM;ALG1;ISPD
positive regulation of extracellular matrix organization (GO:1903055)	2016-02-10	0.309603	0.857967	23.4276	-3.58886	MFI2;CYP1B1
regulation of germinal center formation (GO:0002634)	2016-02-10	0.309603	0.857967	24.3367	-3.72812	BCL6;ADA
positive regulation of chemokine biosynthetic process (GO:0045080)	2016-02-10	0.309603	0.857967	24.5818	-3.76567	HMOX1;MYD88
regulation of mononuclear cell migration (GO:0071675)	2016-02-10	0.309603	0.857967	25.1578	-3.85389	THBS1;BMP5
behavioral response to ethanol (GO:0048149)	2016-02-10	0.309603	0.857967	25.3798	-3.8879	EPS8;CHRNA7
rRNA modification (GO:0000154)	2016-02-10	0.309603	0.857967	25.3847	-3.88866	DIMT1;TFB1M
positive regulation of tumor necrosis factor biosynthetic process (GO:0042535)	2016-02-10	0.309603	0.857967	25.3924	-3.88985	HSPB1;THBS1
regulation of epithelial cell proliferation involved in prostate gland development (GO:0060768)	2016-02-10	0.309603	0.857967	25.4678	-3.90139	APC;NKX3-1
positive regulation of endothelial cell differentiation (GO:0045603)	2016-02-10	0.309603	0.857967	25.5149	-3.90861	BTG1;S1PR2
positive regulation of lipoprotein lipase activity (GO:0051006)	2016-02-10	0.309603	0.857967	25.532	-3.91122	ABHD5;LMF1
cranial suture morphogenesis (GO:0060363)	2016-02-10	0.309603	0.857967	25.6428	-3.92819	MSX2;INSIG1
regulation of heat generation (GO:0031650)	2016-02-10	0.309603	0.857967	26.12	-4.00129	ARRDC3;PTGS2
regulation of triglyceride catabolic process (GO:0010896)	2016-02-10	0.309603	0.857967	26.301	-4.02903	ABHD5;PLIN5
positive regulation of triglyceride lipase activity (GO:0061365)	2016-02-10	0.309603	0.857967	26.4063	-4.04516	ABHD5;LMF1
positive regulation of keratinocyte differentiation (GO:0045618)	2016-02-10	0.309603	0.857967	26.4275	-4.0484	VDR;NCOA3
regulation of tight junction assembly (GO:2000810)	2016-02-10	0.309603	0.857967	26.6302	-4.07946	SNAI1;SNAI2
nucleotide transmembrane transport (GO:1901679)	2016-02-10	0.309603	0.857967	26.7262	-4.09417	SLC35A1;SLC35D1
Rap protein signal transduction (GO:0032486)	2016-02-10	0.309603	0.857967	26.7985	-4.10523	RAP2B;PLK2
regulation of cholesterol homeostasis (GO:2000188)	2016-02-10	0.309603	0.857967	27.0043	-4.13676	NR1D1;SREBF2
regulation of apoptotic cell clearance (GO:2000425)	2016-02-10	0.309603	0.857967	27.0637	-4.14586	ITGAV;MFGE8
positive regulation of pseudopodium assembly (GO:0031274)	2016-02-10	0.309603	0.857967	27.2099	-4.16825	APC;CDC42EP2
phospholipid homeostasis (GO:0055091)	2016-02-10	0.309603	0.857967	27.2978	-4.18173	ABCA1;LYST
adenylate cyclase-activating dopamine receptor signaling pathway (GO:0007191)	2016-02-10	0.309603	0.857967	27.6867	-4.2413	SLC9A3R1;GNAS
negative regulation of organelle assembly (GO:1902116)	2016-02-10	0.309603	0.857967	27.7607	-4.25263	TBC1D7;CDK5RAP2
negative regulation of fatty acid biosynthetic process (GO:0045717)	2016-02-10	0.309603	0.857967	27.987	-4.2873	INSIG1;WDTC1
xenobiotic catabolic process (GO:0042178)	2016-02-10	0.309603	0.857967	28.0472	-4.29653	GSTM4;GSTM1
neurofilament cytoskeleton organization (GO:0060052)	2016-02-10	0.309603	0.857967	28.0746	-4.30072	ARHGEF28;CLN8
protein deneddylation (GO:0000338)	2016-02-10	0.309603	0.857967	28.0925	-4.30347	COPS6;TOR1A
histamine transport (GO:0051608)	2016-02-10	0.309603	0.857967	28.1169	-4.30721	EDN1;ADA
negative regulation of type 2 immune response (GO:0002829)	2016-02-10	0.309603	0.857967	28.2614	-4.32934	BCL6;IL27RA
response to insecticide (GO:0017085)	2016-02-10	0.309603	0.857967	28.3984	-4.35033	NR4A2;CYP11A1
regulation of clathrin-mediated endocytosis (GO:2000369)	2016-02-10	0.309603	0.857967	28.6011	-4.38137	DAB2;UNC119
peroxisome fission (GO:0016559)	2016-02-10	0.309603	0.857967	28.775	-4.40802	PEX19;DNM1L
activation of Rac GTPase activity (GO:0032863)	2016-02-10	0.309603	0.857967	28.8655	-4.42188	ARHGAP24;EPHA2
maintenance of protein localization in endoplasmic reticulum (GO:0035437)	2016-02-10	0.309603	0.857967	28.8822	-4.42444	OS9;HSPA5
protein localization to cilium (GO:0061512)	2016-02-10	0.309603	0.857967	28.9275	-4.43138	IFT140;TTC21B
UDP-N-acetylglucosamine metabolic process (GO:0006047)	2016-02-10	0.309603	0.857967	28.9358	-4.43265	GFPT2;UAP1
L-phenylalanine metabolic process (GO:0006558)	2016-02-10	0.309603	0.857967	29.0481	-4.44985	QDPR;SPR
snRNA transcription (GO:0009301)	2016-02-10	0.309603	0.857967	29.0524	-4.45052	ZC3H8;ELL2
negative regulation of telomere maintenance (GO:0032205)	2016-02-10	0.309603	0.857967	29.0551	-4.45093	PIF1;TERF1
N-glycan processing (GO:0006491)	2016-02-10	0.309603	0.857967	29.3966	-4.50325	MAN2A1;MAN1A2
erythrose 4-phosphate/phosphoenolpyruvate family amino acid metabolic process (GO:1902221)	2016-02-10	0.309603	0.857967	29.539	-4.52505	QDPR;SPR
notochord development (GO:0030903)	2016-02-10	0.309603	0.857967	29.5421	-4.52553	STIL;ID3
neuromuscular process controlling posture (GO:0050884)	2016-02-10	0.309603	0.857967	29.8306	-4.56972	GCH1;CLN8
folic acid metabolic process (GO:0046655)	2016-02-10	0.309603	0.857967	30.0133	-4.59772	SLC46A1;SHMT1
nucleoside diphosphate biosynthetic process (GO:0009133)	2016-02-10	0.309603	0.857967	30.185	-4.62401	DTYMK;AK1
peptide catabolic process (GO:0043171)	2016-02-10	0.309603	0.857967	31.2453	-4.78645	LTA4H;IDE
regulation of neuron death (GO:1901214)	26/225	0.314295	0.860037	1.91569	-0.288849	CEBPB;STXBP1;SIX1;PSEN1;FOXO3;CLU;BCL2L11;TRIM2;HMOX1;PPARGC1A;SRPK2;JUN;EGLN3;GPX1;WFS1;BTBD10;OXR1;NR4A2;GCLC;MSH2;DDIT3;PPT1;NES;LGMN;ZPR1;CPEB4
signal release (GO:0023061)	15/124	0.314281	0.860037	2.14561	-0.323516	EDN1;SNAPIN;ANXA1;MAOA;STXBP1;EIF2AK3;ADM;TBX3;GLS;PCLO;SELM;PPT1;VAMP1;SELT;CAMK2G
mucopolysaccharide metabolic process (GO:1903510)	15/124	0.314281	0.860037	2.15338	-0.324686	ITIH4;SLC35D1;SDC4;HEXB;ABCC5;SDC2;MAMDC2;GNS;SLC9A1;IDS;CSPG4;B4GALT7;ST3GAL1;B4GALT4;CD44
regulation of cytokine secretion (GO:0050707)	13/106	0.315693	0.860037	2.43653	-0.36738	PTGER4;ANXA1;CADM1;C5AR2;ANXA4;PRKCZ;PANX1;RABGEF1;CASP1;CD58;TNFRSF21;LGR4;CD276
developmental growth involved in morphogenesis (GO:0060560)	1979-10-01	0.315599	0.860037	2.86331	-0.43173	MESP1;RARG;NRP2;BIN3;CADM1;MSX2;LHX2;PRKCZ;LRP6;ROBO1
positive regulation of epithelial cell migration (GO:0010634)	1979-10-01	0.315599	0.860037	2.86448	-0.431907	SCARB1;BCAS3;EDN1;NRP2;BMPR2;HSPB1;PTGS2;THBS1;ETS1;HBEGF
cytokinesis (GO:0000910)	1979-10-01	0.315599	0.860037	2.91221	-0.439103	DIAPH2;ZFYVE26;BIN3;ESPL1;APC;NEK7;MYH9;BRCA2;MYH10;CEP55
hormone secretion (GO:0046879)	1970-09-01	0.314543	0.860037	3.15473	-0.475671	EDN1;PCLO;ANXA1;SELM;EIF2AK3;ADM;SELT;CAMK2G;TBX3
glial cell differentiation (GO:0010001)	1961-08-01	0.312632	0.860037	3.34646	-0.504579	CDKN2C;DUSP10;CNP;CYP11A1;PPAP2B;HES1;VIM;LRP6
regulation of skeletal muscle tissue development (GO:0048641)	1961-08-01	0.312632	0.860037	3.35346	-0.505635	TCF7L2;BTG1;UQCC2;DDIT3;IGFBP3;ID3;HMGCR;TBX3
actin filament-based movement (GO:0030048)	1961-08-01	0.312632	0.860037	3.40869	-0.513963	MYO1E;MYL6;MYO6;MYH9;PARVA;VIM;MYH10;SYNE2
pyridine-containing compound metabolic process (GO:0072524)	1961-08-01	0.312632	0.860037	3.53287	-0.532687	RPIA;PNP;HIBADH;DCXR;FDXR;NMNAT3;PGD;PCK2
cAMP metabolic process (GO:0046058)	1935-05-01	0.315275	0.860037	5.58568	-0.842209	PDE4C;GNAS;ADM;PDE7B;PDE8A
negative regulation of nucleoside metabolic process (GO:0045978)	1935-05-01	0.315275	0.860037	5.64398	-0.851	ARFGEF1;BCAS3;MLXIPL;FICD;GMIP
regulation of skeletal muscle fiber development (GO:0048742)	1935-05-01	0.315275	0.860037	5.65166	-0.852159	BTG1;DDIT3;IGFBP3;ID3;TBX3
regulation of antigen receptor-mediated signaling pathway (GO:0050854)	1935-05-01	0.315275	0.860037	5.69341	-0.858453	DUSP3;PTPN6;CBLB;PHPT1;ADA
regulation of interferon-beta production (GO:0032648)	1935-05-01	0.315275	0.860037	5.70649	-0.860425	PPM1B;RIPK2;IRF1;TRIM38;ZC3HAV1
mesoderm formation (GO:0001707)	1935-05-01	0.315275	0.860037	5.70779	-0.860622	TWSG1;BMPR2;SNAI1;WLS;EPHA2
DNA strand elongation (GO:0022616)	1935-05-01	0.315275	0.860037	5.9077	-0.890764	PRIM2;GINS2;GINS4;RPA2;MCM2
insulin secretion (GO:0030073)	1935-05-01	0.315275	0.860037	5.924	-0.893221	PCLO;ANXA1;EIF2AK3;SELT;CAMK2G
nerve development (GO:0021675)	1935-05-01	0.315275	0.860037	6.30881	-0.951244	NRP2;TMEM126A;SLC1A3;HES1;NAV2
regulation of T cell differentiation (GO:0045580)	1997-12-01	0.316038	0.860462	2.55441	-0.38389	PNP;BCL6;RIPK2;IRF1;NKAP;SOX13;ZC3H8;TNFSF9;AP3B1;NFKBID;PRKCZ;ADA
organic acid transport (GO:0015849)	26/226	0.3217	0.861459	1.91329	-0.285325	SLC46A1;SLC35D1;STXBP1;SLC1A3;PSEN1;CLN8;GLS;SLC25A26;SLC9A3R1;MPC1;MYO6;SLC16A7;SLC38A9;SLC19A2;MFSD2A;PRKAB2;ANXA1;PNPLA8;AKR1C1;PLA2G4A;PLIN2;NFKBIE;SFXN5;SLC26A6;SERINC5;PPARD
regulation of DNA metabolic process (GO:0051052)	30/265	0.33447	0.861459	1.92168	-0.286576	PIF1;BLM;CDKN1A;BMPR2;TMEM161A;DSCC1;DBF4B;BRCA2;IL27RA;CST3;MCIDAS;OBFC1;NBN;PPARGC1A;E2F7;TSPYL2;JUN;TIPIN;RPA2;HUS1;ESCO2;TERF1;BMP5;CCDC88A;KITLG;MIS18A;RNF169;BCL6;MSH2;ID3
single organismal cell-cell adhesion (GO:0016337)	27/235	0.319689	0.861459	1.92619	-0.287249	STXBP3;STXBP1;GCNT1;HSPB1;PSEN1;CYR61;ICAM1;LRP6;STK10;PERP;CDH24;CYP1B1;ITGAV;CD58;LMO7;PARVA;CD2AP;RAP2B;TNIP1;PPAP2B;GNAS;MYH9;ITGA6;PTPN6;ITGA5;CD44;VCL
anatomical structure homeostasis (GO:0060249)	24/208	0.325773	0.861459	1.94301	-0.289758	PRIM2;PIF1;BLM;PARP1;HOMER1;EPAS1;HSPB1;RPA2;ADRB2;TERF1;CTGF;RAD51D;BBS10;FGGY;P2RX4;APC;POLE2;GNAS;FBXO4;GCNT2;OBFC1;NBN;DFNB31;ZNF675
regulation of small GTPase mediated signal transduction (GO:0051056)	29/256	0.336843	0.861459	1.94607	-0.290213	NOTCH2;FAM13A;ARHGAP19;ARHGAP18;RHOBTB1;RABGEF1;CYTH2;OPHN1;EPS8L1;MFN2;ABCA1;VAV3;ARFGEF1;STARD13;RALGAPA1;ARHGEF17;CEP152;TNK1;ARHGAP29;ARAP1;GMIP;ARHGAP24;NET1;DEPDC1B;KITLG;BCL6;ARHGEF3;RGL3;RHOV
cell-cell junction organization (GO:0045216)	19/161	0.318502	0.861459	2.01405	-0.300352	CADM1;FBF1;TESK2;SORBS1;PTPRK;F11R;MPP5;TJP1;APC;PERP;ZNF703;CLDN12;MICALL2;NUMB;CDH24;SNAI2;FERMT2;VCL;RAB8B
positive regulation of cell adhesion (GO:0045785)	20/171	0.325465	0.861459	2.03651	-0.303701	VAV3;SDC4;MYO10;EMP2;THBS1;PRKCZ;CYR61;NET1;DAB2;CCDC80;APC;SMOC1;GCNT2;ITGA6;PTPN6;ITGAV;RSU1;ITGA5;KIFAP3;CD44
response to acid chemical (GO:0001101)	31/275	0.33899	0.861459	2.04237	-0.304575	RARG;CEBPB;TMEM161A;OGG1;PTGS2;AACS;ICAM1;LRP6;CTGF;SOCS1;CYP11A1;UCP2;PDK4;CAPN2;ABL2;PPARGC1A;MICB;ABCA1;EDN1;GPX1;HMGCS1;AKR1C1;ATP2B4;KRT8;GDAP1;SCAMP3;ACER2;TGFBR3;GNAS;CPEB4;PTGES
fibroblast growth factor receptor signaling pathway (GO:0008543)	19/163	0.33617	0.861459	2.1071	-0.314228	CDKN1A;EGF;GAB1;ITPR2;PIK3R1;FOXO3;SHCBP1;FOXO1;CTGF;NR4A1;KITLG;AGO3;NRG4;AGO1;THEM4;RICTOR;CALM1;TNRC6B;HBEGF
developmental growth (GO:0048589)	19/163	0.33617	0.861459	2.12706	-0.317205	MESP1;RARG;NRP2;GPX1;IGFBP5;CADM1;MSX2;NCOA3;ADM;FOXO3;PRKCZ;ROBO1;LRP6;TEC;BIN3;LHX2;TBCE;GNAS;NBN
positive regulation of epithelial cell proliferation (GO:0050679)	17/144	0.330909	0.861459	2.15028	-0.320667	TCF7L2;OSR2;JUN;GRN;NRP2;BMPR2;WDR48;C5AR2;VASH2;TGFA;PGF;BMP5;PDCL3;NR4A1;KIF3A;ZNF703;RICTOR
regulation of leukocyte differentiation (GO:1902105)	24/210	0.341439	0.861459	2.15057	-0.32071	JUN;RIPK2;SOX13;NKAP;ZC3H8;AP3B1;PIK3R1;FOS;PRDM1;PRKCZ;RUNX1;KITLG;PNP;CASP8;APC;BCL6;IRF1;ASXL2;GNAS;TNFSF9;PTPN6;ZNF675;NFKBID;ADA
tube development (GO:0035295)	19/164	0.345093	0.861459	2.2255	-0.331884	TCF7L2;STIL;ARG2;WDR48;JAG1;SDC4;SEMA3C;SIX1;SMAD6;PCSK5;ACAT1;HHEX;CAT;PLXNA2;ITGA6;HES1;ADA;HOXA5;EPHA2
regulation of carbohydrate metabolic process (GO:0006109)	17/145	0.340352	0.861459	2.27521	-0.339297	ARFGEF1;TCF7L2;PRKAA1;SLC35B4;IGFBP5;SMEK1;EGF;IGFBP3;SORBS1;NR1D1;FOXO1;ACER2;MLXIPL;HRH1;PDK4;PHLDA2;PPARGC1A
phosphatidylinositol-mediated signaling (GO:0048015)	16/136	0.342425	0.861459	2.32615	-0.346895	EDN1;CDKN1A;EGF;GAB1;PIK3R1;FOXO3;FOXO1;NR4A1;KITLG;AGO3;NRG4;AGO1;THEM4;RICTOR;TNRC6B;HBEGF
inositol lipid-mediated signaling (GO:0048017)	16/136	0.342425	0.861459	2.32875	-0.347282	EDN1;CDKN1A;EGF;GAB1;PIK3R1;FOXO3;FOXO1;NR4A1;KITLG;AGO3;NRG4;AGO1;THEM4;RICTOR;TNRC6B;HBEGF
regulation of response to biotic stimulus (GO:0002831)	13/107	0.326524	0.861459	2.45133	-0.365562	ZC3HAV1;HLA-A;PRDM1;DDX60;SIGIRR;PPM1B;TRIM5;TRIM15;TRIM38;TRIB1;MICB;BIRC3;MB21D1
regulation of wound healing (GO:0061041)	13/107	0.326524	0.861459	2.46798	-0.368046	ARFGEF1;EDN1;TNFRSF12A;FAM46A;SERPINE1;PLAUR;PLAT;HMGCR;THBS1;USF1;TEC;UBASH3B;HBEGF
osteoblast differentiation (GO:0001649)	1998-12-01	0.327371	0.861459	2.54009	-0.378799	WWOX;IGFBP5;MSX2;IGFBP3;CAT;SNAI1;SNAI2;RRBP1;DNAJC13;LGR4;CYR61;EPHA2
cellular response to metal ion (GO:0071248)	1999-12-01	0.338792	0.861459	2.67816	-0.399389	JUN;CLIC4;MT2A;CYP11A1;OGG1;BNIP3;SLC11A2;HMOX1;FOSB;MT1X;FOS;MT1E
negative regulation of inflammatory response (GO:0050728)	1989-11-01	0.32795	0.861459	2.7499	-0.410088	PTGER4;RABGEF1;ANXA1;DUSP10;GPX1;CHRNA7;GBA;UACA;ADA;CD276;PPARD
chromosome segregation (GO:0007059)	1989-11-01	0.32795	0.861459	2.75216	-0.410425	LATS1;MIS18A;ESPL1;TOP1MT;KIF2C;NEK2;ESCO2;ZWINT;CDK5RAP2;SPC25;CENPC
response to cAMP (GO:0051591)	1990-11-01	0.339948	0.861459	2.91269	-0.434365	FOSL1;JUN;IGFBP5;CYP11A1;NDUFS4;BCKDHB;FOSB;ITPR2;PLAT;FOS;SLC26A6
platelet degranulation (GO:0002576)	1981-10-01	0.340834	0.861459	3.09803	-0.462003	CFD;HSPA5;EGF;STXBP1;SERPINE1;TIMP1;CALM1;THBS1;CLU;VCL
negative regulation of immune effector process (GO:0002698)	1981-10-01	0.340834	0.861459	3.11453	-0.464464	RABGEF1;PPM1B;DUSP10;BCL6;HMOX1;PTPN6;HLA-A;TRIM38;HLA-E;MICB
regulation of leukocyte apoptotic process (GO:2000106)	1971-09-01	0.327891	0.861459	3.13075	-0.466883	KITLG;BLM;ANXA1;CASP8;BCL6;ZC3H8;NFKBID;ADA;AURKB
positive regulation of adaptive immune response based on somatic recombination of immune receptors built from immunoglobulin superfamily domains (GO:0002824)	1971-09-01	0.327891	0.861459	3.14399	-0.468857	HLA-H;RIPK2;HLA-C;HLA-A;MR1;PRKCZ;ADA;HLA-E;IL27RA
phosphatidylcholine metabolic process (GO:0046470)	1962-08-01	0.326915	0.861459	3.3979	-0.506723	PLA2G15;PLA2G16;PNPLA8;LPCAT3;LPCAT2;MBOAT1;PLA2G4A;LPIN3
embryonic heart tube morphogenesis (GO:0003143)	1962-08-01	0.326915	0.861459	3.39865	-0.506834	MESP1;STIL;ARL13B;HES1;PSEN1;BBS7;TBX3;LRP6
negative regulation of nucleocytoplasmic transport (GO:0046823)	1962-08-01	0.326915	0.861459	3.50111	-0.522114	FZD1;PPM1B;MDFIC;TONSL;SNAI2;NFKBIE;UACA;SOX4
positive regulation of endothelial cell proliferation (GO:0001938)	1963-08-01	0.341307	0.861459	3.64509	-0.543585	PDCL3;NR4A1;JUN;NRP2;BMPR2;VASH2;RICTOR;PGF
negative regulation of protein import into nucleus (GO:0042308)	1953-07-01	0.324921	0.861459	3.87344	-0.577639	FZD1;PPM1B;MDFIC;TONSL;SNAI2;NFKBIE;UACA
keratinocyte differentiation (GO:0030216)	1954-07-01	0.340472	0.861459	3.92728	-0.585668	LATS1;CLIC4;ANXA1;JAG1;TXNIP;EPHA2;SAV1
negative regulation of nuclear division (GO:0051784)	1954-07-01	0.340472	0.861459	3.97102	-0.592191	MSH2;APC;UBE2D1;ANAPC4;ANAPC5;TERF1;MAD1L1
DNA biosynthetic process (GO:0071897)	1954-07-01	0.340472	0.861459	4.10628	-0.612362	POLB;POLE4;KIAA0101;POLE2;POLI;POLG;CTGF
regulation of nitric oxide biosynthetic process (GO:0045428)	1944-06-01	0.321368	0.861459	4.32249	-0.644605	EDN1;P2RX4;ATP2B4;PTGS2;CLU;ICAM1
negative regulation of mitosis (GO:0045839)	1944-06-01	0.321368	0.861459	4.52977	-0.675516	APC;UBE2D1;ANAPC4;ANAPC5;TERF1;MAD1L1
regulation of cellular response to insulin stimulus (GO:1900076)	1945-06-01	0.338397	0.861459	4.61169	-0.687733	OSBPL8;PTPN1;PRKAA1;ANKRD26;SOCS1;PRKCZ
eye morphogenesis (GO:0048592)	1945-06-01	0.338397	0.861459	4.66642	-0.695895	ALDH1A3;RARG;COL5A1;MFN2;VAX2;LRP6
substantia nigra development (GO:0021762)	1945-06-01	0.338397	0.861459	4.69449	-0.700081	ZNF430;HSPA5;YWHAQ;CNP;CCDC14;CALM1
positive regulation of ion transmembrane transporter activity (GO:0032414)	1945-06-01	0.338397	0.861459	4.80924	-0.717193	STIM1;CNKSR3;GLRX;ATP1B2;HAP1;CALM1
blood vessel remodeling (GO:0001974)	1936-05-01	0.33428	0.861459	5.42305	-0.80873	DLL4;BMPR2;JAG1;SEMA3C;EPAS1
positive regulation of B cell proliferation (GO:0030890)	1936-05-01	0.33428	0.861459	5.56784	-0.830322	VAV3;CDKN1A;BCL6;PELI1;ADA
regulation of insulin receptor signaling pathway (GO:0046626)	1936-05-01	0.33428	0.861459	5.69284	-0.848962	OSBPL8;PTPN1;ANKRD26;SOCS1;PRKCZ
activation of JUN kinase activity (GO:0007257)	1936-05-01	0.33428	0.861459	5.74747	-0.857109	DAB2;MAP3K1;MDFIC;GAB1;MAP3K6
telomere maintenance via telomere lengthening (GO:0010833)	1936-05-01	0.33428	0.861459	5.88746	-0.877987	PRIM2;POLE2;OBFC1;RPA2;TERF1
placenta development (GO:0001890)	1936-05-01	0.33428	0.861459	6.03514	-0.900009	DLX3;PHLDA2;MAP3K4;ADA;E2F7
developmental programmed cell death (GO:0010623)	2016-04-27	0.32647	0.861459	7.69211	-1.14711	SLC4A7;KITLG;BCL2L11;CYR61
epithelial tube formation (GO:0072175)	2016-04-27	0.32647	0.861459	7.88087	-1.17526	CASP8;TCTN1;SIX1;SOX4
negative regulation of lymphocyte apoptotic process (GO:0070229)	2016-04-27	0.32647	0.861459	7.97259	-1.18894	BLM;BCL6;ADA;AURKB
positive regulation of protein insertion into mitochondrial membrane involved in apoptotic signaling pathway (GO:1900740)	2016-04-27	0.32647	0.861459	8.0582	-1.2017	SH3GLB1;BCL2L11;CASP8;YWHAQ
regulation of protein insertion into mitochondrial membrane involved in apoptotic signaling pathway (GO:1900739)	2016-04-27	0.32647	0.861459	8.09118	-1.20662	SH3GLB1;BCL2L11;CASP8;YWHAQ
porphyrin-containing compound biosynthetic process (GO:0006779)	2016-04-27	0.32647	0.861459	8.2848	-1.2355	ALAD;ALAS1;SLC11A2;PPOX
regulation of vascular permeability (GO:0043114)	2016-04-27	0.32647	0.861459	8.37502	-1.24895	TJP1;HRH1;NPR1;ADM
cardiac epithelial to mesenchymal transition (GO:0060317)	2016-03-19	0.337413	0.861459	11.924	-1.7782	TGFBR3;MSX2;SNAI2
thyroid gland development (GO:0030878)	2016-03-19	0.337413	0.861459	11.9739	-1.78564	HHEX;SIX1;HOXA5
male genitalia development (GO:0030539)	2016-03-19	0.337413	0.861459	12.1087	-1.80575	LGR4;TBX3;BMP5
regulation of cholesterol efflux (GO:0010874)	2016-03-19	0.337413	0.861459	12.2529	-1.82725	ABCA1;EGF;SREBF2
platelet formation (GO:0030220)	2016-03-19	0.337413	0.861459	12.3519	-1.84201	VPS33A;MYH9;PTPN6
membrane invagination (GO:0010324)	2016-03-19	0.337413	0.861459	12.5117	-1.86585	ABCA1;MFGE8;THBS1
myoblast differentiation (GO:0045445)	2016-03-19	0.337413	0.861459	12.7691	-1.90423	DTYMK;JAG1;HMGCR
methionine metabolic process (GO:0006555)	2016-03-19	0.337413	0.861459	12.8291	-1.91318	GOT1;ADI1;MTR
syncytium formation by plasma membrane fusion (GO:0000768)	2016-03-19	0.337413	0.861459	12.8441	-1.91541	CAPN2;MYH9;PITX2
negative chemotaxis (GO:0050919)	2016-03-19	0.337413	0.861459	12.8746	-1.91996	NRP2;ITGAV;ROBO1
regulation of hair cycle (GO:0042634)	2016-03-19	0.337413	0.861459	12.9952	-1.93796	PER1;KRT17;MSX2
positive regulation of calcium ion transmembrane transporter activity (GO:1901021)	2016-03-19	0.337413	0.861459	13.0409	-1.94477	STIM1;HAP1;CALM1
cellular protein catabolic process (GO:0044257)	2016-03-19	0.337413	0.861459	13.0837	-1.95114	BNIP3;PPT1;CLN8
appendage development (GO:0048736)	2016-03-19	0.337413	0.861459	13.1543	-1.96168	BMPR2;SMOC1;BBS7
endothelial cell proliferation (GO:0001935)	2016-03-19	0.337413	0.861459	13.1702	-1.96405	SCARB1;HMOX1;LOXL2
myeloid cell homeostasis (GO:0002262)	2016-03-19	0.337413	0.861459	13.2142	-1.97061	ANXA1;BCL2L11;HMOX1
intestinal absorption (GO:0050892)	2016-03-19	0.337413	0.861459	13.2505	-1.97603	VDR;AKR1C1;SLC26A6
acetyl-CoA metabolic process (GO:0006084)	2016-03-19	0.337413	0.861459	13.2532	-1.97643	ACSS2;PMVK;PDHB
limb development (GO:0060173)	2016-03-19	0.337413	0.861459	13.2546	-1.97664	BMPR2;SMOC1;BBS7
triglyceride catabolic process (GO:0019433)	2016-03-19	0.337413	0.861459	13.3543	-1.9915	PNPLA3;LPL;ABHD5
synaptic vesicle exocytosis (GO:0016079)	2016-03-19	0.337413	0.861459	13.4487	-2.00558	STX12;PCLO;SNAPIN
rRNA transcription (GO:0009303)	2016-03-19	0.337413	0.861459	13.4529	-2.0062	GTF3C6;POLR1E;NPM3
regulation of translational elongation (GO:0006448)	2016-03-19	0.337413	0.861459	13.5364	-2.01866	LARS2;PRORSD1P;EIF5A2
fatty-acyl-CoA biosynthetic process (GO:0046949)	2016-03-19	0.337413	0.861459	13.5527	-2.02109	ELOVL4;TECR;ELOVL7
L-glutamate transport (GO:0015813)	2016-03-19	0.337413	0.861459	13.6448	-2.03483	SLC1A3;PSEN1;CLN8
intracellular pH reduction (GO:0051452)	2016-03-19	0.337413	0.861459	13.6589	-2.03692	CLIC4;PPT1;CLN5
G-protein coupled receptor internalization (GO:0002031)	2016-02-11	0.345151	0.861459	23.9265	-3.56811	ADM;GTF2H2
germ cell migration (GO:0008354)	2016-02-11	0.345151	0.861459	23.9923	-3.57793	PPAP2B;CXCR4
positive regulation of SMAD protein import into nucleus (GO:0060391)	2016-02-11	0.345151	0.861459	24.9469	-3.72028	DAB2;PARP1
positive regulation of sodium ion transmembrane transporter activity (GO:2000651)	2016-02-11	0.345151	0.861459	25.0989	-3.74296	CNKSR3;GLRX
cell fate commitment involved in formation of primary germ layer (GO:0060795)	2016-02-11	0.345151	0.861459	25.4342	-3.79295	CTR9;CDC73
positive regulation of protein ubiquitination involved in ubiquitin-dependent protein catabolic process (GO:2000060)	2016-02-11	0.345151	0.861459	25.5694	-3.81311	EGF;CLU
regulation of Wnt signaling pathway, planar cell polarity pathway (GO:2000095)	2016-02-11	0.345151	0.861459	25.5785	-3.81447	DAB2;LRP6
negative regulation of vascular permeability (GO:0043116)	2016-02-11	0.345151	0.861459	25.6603	-3.82668	TJP1;ADM
response to phenylpropanoid (GO:0080184)	2016-02-11	0.345151	0.861459	25.6871	-3.83067	IDI1;CYP11A1
positive regulation of epidermal growth factor-activated receptor activity (GO:0045741)	2016-02-11	0.345151	0.861459	25.8221	-3.85081	EGF;TGFA
positive regulation of myoblast differentiation (GO:0045663)	2016-02-11	0.345151	0.861459	25.8535	-3.85548	BTG1;IGFBP3
lateral ventricle development (GO:0021670)	2016-02-11	0.345151	0.861459	25.9768	-3.87387	NUMB;MYH10
negative regulation of necrotic cell death (GO:0060547)	2016-02-11	0.345151	0.861459	26.0727	-3.88818	CASP8;BIRC3
response to lead ion (GO:0010288)	2016-02-11	0.345151	0.861459	26.1716	-3.90292	QDPR;SLC11A2
cardiac ventricle formation (GO:0003211)	2016-02-11	0.345151	0.861459	26.1802	-3.90421	MESP1;SOX4
generation of neurons (GO:0048699)	2016-02-11	0.345151	0.861459	26.2235	-3.91066	TCF7L2;SIX1
negative regulation of adherens junction organization (GO:1903392)	2016-02-11	0.345151	0.861459	26.2482	-3.91435	BCAS3;THBS1
establishment of nucleus localization (GO:0040023)	2016-02-11	0.345151	0.861459	26.3448	-3.92875	MYH10;SYNE2
cellular response to reactive nitrogen species (GO:1902170)	2016-02-11	0.345151	0.861459	26.3559	-3.9304	PPARGC1A;FOXO1
positive regulation of steroid hormone secretion (GO:2000833)	2016-02-11	0.345151	0.861459	26.4208	-3.94008	RUNX1;NKX3-1
positive regulation of transcription from RNA polymerase III promoter (GO:0045945)	2016-02-11	0.345151	0.861459	26.5956	-3.96615	AR;ZC3H8
amino acid salvage (GO:0043102)	2016-02-11	0.345151	0.861459	26.7121	-3.98353	GOT1;ADI1
genitalia morphogenesis (GO:0035112)	2016-02-11	0.345151	0.861459	26.7251	-3.98547	TCF7L2;LRP6
regulation of pseudopodium assembly (GO:0031272)	2016-02-11	0.345151	0.861459	26.7736	-3.99269	APC;CDC42EP2
nucleoside transmembrane transport (GO:1901642)	2016-02-11	0.345151	0.861459	26.8192	-3.99949	SLC25A26;SLC29A3
oxaloacetate metabolic process (GO:0006107)	2016-02-11	0.345151	0.861459	26.8599	-4.00557	GOT1;PCK2
negative regulation of cell junction assembly (GO:1901889)	2016-02-11	0.345151	0.861459	26.9019	-4.01183	BCAS3;THBS1
head development (GO:0060322)	2016-02-11	0.345151	0.861459	26.9079	-4.01272	OSR2;PGAP1
detection of bacterium (GO:0016045)	2016-02-11	0.345151	0.861459	26.9687	-4.0218	NOD1;HLA-A
coenzyme A biosynthetic process (GO:0015937)	2016-02-11	0.345151	0.861459	27.2321	-4.06107	PANK3;ACOT7
eyelid development in camera-type eye (GO:0061029)	2016-02-11	0.345151	0.861459	27.2512	-4.06392	OSR2;MAP3K1
negative regulation of focal adhesion assembly (GO:0051895)	2016-02-11	0.345151	0.861459	27.433	-4.09103	BCAS3;THBS1
regulation of lipoprotein metabolic process (GO:0050746)	2016-02-11	0.345151	0.861459	27.4617	-4.09531	ITGAV;SVIP
L-methionine salvage (GO:0071267)	2016-02-11	0.345151	0.861459	27.57	-4.11146	GOT1;ADI1
protein heterotetramerization (GO:0051290)	2016-02-11	0.345151	0.861459	27.6671	-4.12594	PDSS2;ALDOC
positive regulation of catenin import into nucleus (GO:0035413)	2016-02-11	0.345151	0.861459	27.6919	-4.12964	BAMBI;EGF
response to peptidoglycan (GO:0032494)	2016-02-11	0.345151	0.861459	27.7615	-4.14001	RIPK2;MYD88
L-methionine biosynthetic process (GO:0071265)	2016-02-11	0.345151	0.861459	27.7664	-4.14076	GOT1;ADI1
mitotic cell cycle arrest (GO:0071850)	2016-02-11	0.345151	0.861459	27.7955	-4.1451	CDKN1A;NKX3-1
positive regulation of protein sumoylation (GO:0033235)	2016-02-11	0.345151	0.861459	27.8147	-4.14795	RWDD3;PIAS1
L-ascorbic acid metabolic process (GO:0019852)	2016-02-11	0.345151	0.861459	27.8203	-4.1488	GCLC;SLC2A3
regulation of peroxisome proliferator activated receptor signaling pathway (GO:0035358)	2016-02-11	0.345151	0.861459	27.888	-4.15888	ASXL2;PLIN5
response to UV-C (GO:0010225)	2016-02-11	0.345151	0.861459	27.9901	-4.17411	BRCA2;MAP3K4
DNA replication checkpoint (GO:0000076)	2016-02-11	0.345151	0.861459	28.0183	-4.17832	TIPIN;RAD9A
positive regulation of receptor biosynthetic process (GO:0010870)	2016-02-11	0.345151	0.861459	28.0396	-4.1815	EDN1;HOXA5
urea cycle (GO:0000050)	2016-02-11	0.345151	0.861459	28.0547	-4.18374	ARG2;ASL
phosphorelay signal transduction system (GO:0000160)	2016-02-11	0.345151	0.861459	28.1949	-4.20466	PDE8A;CNTLN
dichotomous subdivision of an epithelial terminal unit (GO:0060600)	2016-02-11	0.345151	0.861459	28.3142	-4.22244	TFAP2C;SEMA3C
cellular response to electrical stimulus (GO:0071257)	2016-02-11	0.345151	0.861459	28.3566	-4.22877	MYO6;ADSS
kidney morphogenesis (GO:0060993)	2016-02-11	0.345151	0.861459	28.4825	-4.24755	GCNT1;SOX4
negative regulation of epidermal cell differentiation (GO:0045605)	2016-02-11	0.345151	0.861459	28.6128	-4.26698	MSX2;HES1
norepinephrine metabolic process (GO:0042415)	2016-02-11	0.345151	0.861459	28.8673	-4.30493	SPR;EPAS1
fatty acid beta-oxidation using acyl-CoA oxidase (GO:0033540)	2016-02-11	0.345151	0.861459	28.886	-4.30771	AMACR;SCP2
protein autoprocessing (GO:0016540)	2016-02-11	0.345151	0.861459	28.9312	-4.31446	PARP1;CAPN2
inositol phosphate catabolic process (GO:0071545)	2016-02-11	0.345151	0.861459	28.9601	-4.31876	IMPA1;NUDT3
regulation of protein glycosylation (GO:0060049)	2016-02-11	0.345151	0.861459	28.9615	-4.31897	ACER2;ARFGEF1
UMP biosynthetic process (GO:0006222)	2016-02-11	0.345151	0.861459	28.9633	-4.31925	UPRT;DHODH
kinetochore assembly (GO:0051382)	2016-02-11	0.345151	0.861459	29.0552	-4.33295	CENPE;CENPC
activation of transmembrane receptor protein tyrosine kinase activity (GO:0007171)	2016-02-11	0.345151	0.861459	29.0666	-4.33464	EGF;ADRB2
pyrimidine ribonucleoside monophosphate biosynthetic process (GO:0009174)	2016-02-11	0.345151	0.861459	29.1819	-4.35184	UPRT;DHODH
histone H2A monoubiquitination (GO:0035518)	2016-02-11	0.345151	0.861459	29.2046	-4.35523	RNF2;SKP1
nephron tubule morphogenesis (GO:0072078)	2016-02-11	0.345151	0.861459	29.2053	-4.35534	HES1;LGR4
spindle assembly involved in mitosis (GO:0090307)	2016-02-11	0.345151	0.861459	29.2408	-4.36062	SPICE1;NEK2
attachment of spindle microtubules to kinetochore (GO:0008608)	2016-02-11	0.345151	0.861459	29.4958	-4.39865	CASC5;AURKB
UMP metabolic process (GO:0046049)	2016-02-11	0.345151	0.861459	29.5654	-4.40903	UPRT;DHODH
protein prenylation (GO:0018342)	2016-02-11	0.345151	0.861459	29.913	-4.46086	PTAR1;PGGT1B
pyrimidine ribonucleoside monophosphate metabolic process (GO:0009173)	2016-02-11	0.345151	0.861459	29.9251	-4.46267	UPRT;DHODH
nephron epithelium morphogenesis (GO:0072088)	2016-02-11	0.345151	0.861459	30.0139	-4.47591	HES1;LGR4
regulation of translation in response to stress (GO:0043555)	2016-02-11	0.345151	0.861459	30.3104	-4.52013	EIF2B3;EIF2AK3
regulation of attachment of spindle microtubules to kinetochore (GO:0051988)	2016-02-11	0.345151	0.861459	30.6693	-4.57365	APC;NEK2
prenylation (GO:0097354)	2016-02-11	0.345151	0.861459	30.9475	-4.61515	PTAR1;PGGT1B
post-embryonic morphogenesis (GO:0009886)	2016-02-11	0.345151	0.861459	31.1294	-4.64227	BCL2L11;GNAS
cell part morphogenesis (GO:0032990)	28/248	0.346529	0.863953	2.2807	-0.333523	GALNT11;CNP;SDC2;ARHGEF28;MYCBP2;ULK4;SPAST;KIF3A;TCTN2;TCTN1;BBS7;DNM1L;FZD1;BBS2;KIDINS220;SLC11A2;PARVA;VAX2;NR4A2;IFT88;APC;TMEM216;TBCE;ABI1;S100A6;NUMB;NES;C5ORF30
cell maturation (GO:0048469)	14/118	0.346479	0.863953	2.6725	-0.390819	CDKN1C;EPAS1;BRCA2;FOXO3;HOXB13;KLF2;ESR2;CLN5;CDC25B;RND1;NR4A2;HES1;SLC26A6;HOXA5
cellular cation homeostasis (GO:0030003)	43/389	0.346777	0.864096	2.26801	-0.33129	SLC46A1;CLIC4;MCUR1;STEAP3;ABCB7;HEXB;MFI2;CHRNA7;CXCR4;ADM;PSEN1;TCIRG1;JPH1;NUBP1;ERO1L;CLN5;SLC9A1;LRP6;MT2A;HMOX1;ABL2;HMOX2;EDN1;EDN2;SLC31A2;WFS1;VDR;SLC30A5;SLC11A2;ATP2B4;ATP1B2;SLC35G1;MCOLN1;SLC8B1;TPCN2;ATOX1;DDIT3;ATP6V1B2;PPT1;MICU2;MICU1;MON1A;SLC26A6
negative regulation of neuron death (GO:1901215)	18/155	0.347464	0.865336	2.43068	-0.351567	JUN;CEBPB;WFS1;STXBP1;SIX1;PSEN1;BTBD10;OXR1;NR4A2;GCLC;MSH2;PPT1;HMOX1;PPARGC1A;NES;LGMN;ZPR1;CPEB4
response to ethanol (GO:0045471)	13/109	0.348427	0.865368	2.8017	-0.405126	PRKAA1;OGG1;CHRNA7;ITPR2;GGH;HMGCR;CSF2RA;AACS;ICAM1;POLB;TJP1;EPS8;CASP8
regulation of epithelial cell differentiation (GO:0030856)	13/109	0.348427	0.865368	2.89655	-0.418841	MESP1;CDKN2B;BTG1;MSX2;VDR;NCOA3;TBX3;KITLG;APC;MAFF;NUMB;HES1;S1PR2
regulation of macrophage derived foam cell differentiation (GO:0010743)	2016-04-28	0.348404	0.865368	8.72181	-1.26117	ABCA1;ABCA5;LPL;ITGAV
glycerolipid catabolic process (GO:0046503)	2016-04-28	0.348404	0.865368	8.80343	-1.27297	PNPLA8;PNPLA3;LPL;ABHD5
autophagic vacuole assembly (GO:0000045)	2016-04-28	0.348404	0.865368	9.07788	-1.31266	ULK3;ATG4C;ATG2A;PSEN1
cell-matrix adhesion (GO:0007160)	12/100	0.350288	0.86857	2.94958	-0.415618	PPFIBP1;BCAM;BCL2L11;ITGA6;ITGAV;LYPD3;SORBS1;FBLN5;CD44;FERMT2;VCL;CTGF
unsaturated fatty acid metabolic process (GO:0033559)	12/100	0.350288	0.86857	2.96695	-0.418066	FADS3;CBR1;EDN1;EDN2;GPX1;SCP2;PNPLA8;CYP1B1;PLA2G4A;LTA4H;PTGS2;PTGES
establishment or maintenance of cell polarity (GO:0007163)	12/100	0.350288	0.86857	2.99407	-0.421888	FERMT1;CLIC4;SNX27;LMNA;FBF1;MYH9;KIF2C;PARVA;PRKCZ;SYNE2;CAP2;CLASP2
adaptive immune response (GO:0002250)	1991-11-01	0.352024	0.871925	3.11061	-0.426316	JAG1;CADM1;MSH2;BCL6;RIPK2;CTSL;LYST;MICA;MYD88;CTSC;TNFRSF21
regulation of stem cell differentiation (GO:2000736)	1991-11-01	0.352024	0.871925	3.11394	-0.426772	TGFBR3;DAB2;JAG1;BAMBI;ZNF703;SNAI1;GCNT2;HES1;VASN;SAV1;BMP5
regulation of cellular carbohydrate metabolic process (GO:0010675)	16/137	0.352258	0.872029	2.56596	-0.351362	ARFGEF1;TCF7L2;PRKAA1;SLC35B4;IGFBP5;SMEK1;IGFBP3;SORBS1;NR1D1;FOXO1;ACER2;MLXIPL;HRH1;PDK4;PHLDA2;PPARGC1A
regulation of epidermal cell differentiation (GO:0045604)	1937-05-01	0.353379	0.873855	6.37248	-0.859268	MSX2;VDR;NCOA3;MAFF;HES1
regulation of toll-like receptor signaling pathway (GO:0034121)	1937-05-01	0.353379	0.873855	6.41027	-0.864363	IRF1;PELI1;NR1D1;LGR4;BIRC3
epidermal growth factor receptor signaling pathway (GO:0007173)	22/193	0.354674	0.875392	2.41734	-0.321708	CDKN1A;EGF;GAB1;TGFA;ITPR2;PIK3R1;FOXO3;FOXO1;EPS8;NR4A1;KITLG;RPS6KA5;AGO3;NRG4;AGO1;THEM4;RICTOR;CALM1;STAM2;PAG1;TNRC6B;HBEGF
intracellular steroid hormone receptor signaling pathway (GO:0030518)	1973-09-01	0.354876	0.875392	3.57782	-0.47615	AR;MED24;MED30;NCOA3;NCOA4;PPARGC1A;ESR2;PIAS1;NKX3-1
negative regulation of transforming growth factor beta receptor signaling pathway (GO:0030512)	1973-09-01	0.354876	0.875392	3.64366	-0.484912	TGFBR3;HSPA5;BAMBI;SMAD6;LEMD3;VASN;GLG1;SNX6;FBN1
regulation of receptor-mediated endocytosis (GO:0048259)	1964-08-01	0.355787	0.875392	3.87536	-0.515747	RABGEF1;DAB2;HIP1;KIF3A;SERPINE1;PPT1;UNC119;CD2AP
protein polymerization (GO:0051258)	1964-08-01	0.355787	0.875392	4.00152	-0.532536	DIAPH2;TUBB6;TUBB2A;MICALL2;CORO7;TUBB4B;DNM1L;MSRB1
heart looping (GO:0001947)	1955-07-01	0.356114	0.875392	4.22451	-0.562213	MESP1;STIL;ARL13B;PSEN1;BBS7;TBX3;LRP6
embryonic digit morphogenesis (GO:0042733)	1955-07-01	0.356114	0.875392	4.23578	-0.563714	OSR2;IFT88;TMEM107;TULP3;KIAA1715;TBX3;LRP6
leukocyte cell-cell adhesion (GO:0007159)	1946-06-01	0.35552	0.875392	4.87588	-0.6489	STK10;TNIP1;GCNT1;ITGA5;CD44;ICAM1
formation of primary germ layer (GO:0001704)	1946-06-01	0.35552	0.875392	4.8917	-0.651005	DUSP4;TWSG1;BMPR2;SNAI1;WLS;EPHA2
positive regulation of Rac GTPase activity (GO:0032855)	1946-06-01	0.35552	0.875392	4.97253	-0.661763	VAV3;SPATA13;EPS8L1;ARHGAP27;ARHGAP24;EPHA2
regulation of T cell mediated immunity (GO:0002709)	1946-06-01	0.35552	0.875392	5.05273	-0.672435	HLA-H;HLA-C;HLA-A;MR1;PRKCZ;HLA-E
posttranscriptional regulation of gene expression (GO:0010608)	48/438	0.35672	0.876407	2.25621	-0.297649	STX12;STXBP1;EIF5A2;EIF4A3;RBM4B;HSPB1;CREBL2;FOXO3;IFI30;THBS1;CLU;CDC73;RGS2;RASSF1;MTRF1;PAIP2B;GCNT2;PIM2;BTRC;TAF9B;TRIM21;PPARGC1A;SOX4;ISOC2;CCRN4L;EEFSEC;EIF2B3;PEX19;PRORSD1P;KLHL25;IGFBP5;WFS1;UQCC2;SIAH1;EIF2AK3;ATP1B2;PER1;LARS2;KRT17;AGO3;PPAP2B;AGO1;ID1;SELT;EIF4G2;MYD88;TNRC6B;DSC3
proteolysis involved in cellular protein catabolic process (GO:0051603)	43/391	0.358512	0.879862	2.22341	-0.284574	USP53;UBE2D1;OMA1;IDE;FBXO21;USP18;AURKB;UBE2J1;PSMD8;ATXN3;FOXRED2;CASP8;OS9;CTSL;FBXO4;CAPN2;BTRC;SKP1;CTSB;RNF20;EDEM3;USP47;TOR1A;HSPA5;WFS1;RHBDD1;USP45;SIAH1;NR1D1;KLHL20;CD2AP;DNAJC3;RNF103;APC;DDIT3;CLPP;DNAJC10;ANAPC4;ANAPC5;UBA1;TRIM38;LGMN;PCYOX1
single organism cell adhesion (GO:0098602)	29/259	0.358337	0.879862	2.33804	-0.299245	STXBP3;STXBP1;GCNT1;HSPB1;PSEN1;CYR61;ICAM1;LRP6;STK10;PERP;MICALL2;CDH24;CYP1B1;ITGAV;CD58;PARVA;LMO7;CD2AP;RAP2B;TNIP1;PPAP2B;GNAS;MYH9;ITGA6;PTPN6;ITGA5;CD44;FERMT2;VCL
generation of precursor metabolites and energy (GO:0006091)	41/375	0.376155	0.880588	2.39645	-0.304745	PFKFB4;PFKFB3;FASTKD1;NDUFB10;NDUFA12;STXBP1;ITPR2;PYGL;UCP2;FDXR;PGM2;GYG1;PPARGC1A;SLC25A25;XYLB;TCF7L2;PRKAB2;NDUFA4;GFPT2;PHKA1;PPP2R5D;NR1D1;BPGM;GNG11;PHKA2;PGM2L1;MLXIPL;MSH2;PPP1R3C;PPP1R3E;CAT;NDUFS4;GNAS;NDUFS2;ALDOC;MTFR1;NDUFAF1;MTFR2;CALM1;SLC25A14;PPARD
cellular ion homeostasis (GO:0006873)	44/402	0.367522	0.880588	2.4037	-0.305667	SLC46A1;CLIC4;MCUR1;STEAP3;ABCB7;HEXB;MFI2;CHRNA7;CXCR4;ADM;PSEN1;TCIRG1;JPH1;NUBP1;ERO1L;CLN5;SLC9A1;LRP6;SLC9A3R1;MT2A;HMOX1;ABL2;HMOX2;EDN1;EDN2;SLC31A2;WFS1;VDR;SLC30A5;SLC11A2;ATP2B4;ATP1B2;SLC35G1;MCOLN1;SLC8B1;TPCN2;ATOX1;DDIT3;ATP6V1B2;PPT1;MICU2;MICU1;MON1A;SLC26A6
chromosome organization (GO:0051276)	23/204	0.3683	0.880588	2.41735	-0.307403	PRIM2;TCF7L2;PIF1;BLM;PARP1;RPA2;TERF1;GEM;ZWINT;CENPC;LATS1;SYCE2;CENPE;SGOL2;RAD51D;ESPL1;APC;MSH2;POLE2;FBXO4;OBFC1;NEK2;NBN
response to peptide (GO:1901652)	42/384	0.373222	0.880588	2.44914	-0.311445	C2CD5;PRKAA1;GCNT1;ADM;PLAT;TCIRG1;PIK3R1;IDE;PRKCZ;FOXO1;LRP6;SLC2A8;CTGF;HHEX;CYP11A1;UCP2;PDK4;THEM4;TIMP1;TIMP4;WDTC1;PTPN1;PRKAB2;EIF2B3;JAG1;ANXA1;PARP1;GOT1;RIPK2;GAB1;GGH;SORBS1;GNG11;KLF2;USF1;QDPR;POR;KLF5;GNAS;ATP6V1B2;CRY1;UPRT
regulation of anatomical structure size (GO:0090066)	26/232	0.367092	0.880588	2.44968	-0.311514	RARG;NPR1;ADRB2;CLN8;ICAM1;EPS8;LIMA1;DEPTOR;SCIN;RICTOR;SH3BGRL3;SPTAN1;WDTC1;ARFGEF1;VASP;BBS2;EDN1;MAP3K1;EDN2;GPX1;GCH1;MANF;LATS1;GCLC;P2RX4;CDC42EP2
regulation of establishment of protein localization (GO:0070201)	48/442	0.379152	0.880588	2.50658	-0.31875	PTGER4;CDKN1A;C2CD5;C5AR2;OGG1;TONSL;GCC2;PIK3R1;PTGS2;UACA;PRKCZ;PANX1;RABGEF1;CASP8;BCL2L11;YWHAQ;CASP1;CD58;DNM1L;SOX4;CD276;EXPH5;SH3GLB1;FZD1;BCAS3;PLK3;TCF7L2;ANXA1;PARP1;CADM1;EGF;ANXA4;SORBS1;LATS1;AR;DAB2;PPM1B;MDFIC;BAMBI;SELK;SNAI2;NFKBIE;SERGEF;TNFRSF21;LGR4;ZPR1;EPHA2;RBM22
regulation of blood circulation (GO:1903522)	23/204	0.3683	0.880588	2.51568	-0.319907	EDN1;BMPR2;EDN2;NPR1;EPAS1;CHRNA7;ATP2B4;ADM;HMGCR;ADRB2;PTGS2;SLC9A1;CTGF;ICAM1;HRH1;RGS2;P2RX4;SP4;HMOX1;CALM1;ADA;PPARD;HBEGF
defense response to virus (GO:0051607)	17/147	0.35941	0.880588	2.53111	-0.321869	APOBEC3C;IFITM1;BNIP3;STAT2;ZC3HAV1;DDX60;SAMHD1;LYST;OASL;DNAJC3;ISG20;TRIM5;IRF1;POLR3E;MICA;APOBEC3B;MB21D1
regulation of cellular response to growth factor stimulus (GO:0090287)	20/176	0.369033	0.880588	2.60108	-0.330767	CDKN1C;TCF7L2;PTPN1;CDKN2B;HSPA5;SMAD6;LEMD3;THBS1;GLG1;DUSP6;VASN;TGFBR3;DSTYK;DAB2;HHEX;BAMBI;ZNF703;ITGA5;FBN1;SNX6
ERBB signaling pathway (GO:0038127)	22/196	0.379827	0.880588	2.60922	-0.331802	CDKN1A;EGF;GAB1;ITPR2;TGFA;PIK3R1;FOXO3;FOXO1;EPS8;NR4A1;KITLG;RPS6KA5;AGO3;NRG4;AGO1;THEM4;RICTOR;CALM1;STAM2;PAG1;HBEGF;TNRC6B
regulation of nuclear division (GO:0051783)	16/138	0.362145	0.880588	2.62502	-0.333811	L3MBTL1;EDN1;MSX2;EGF;UBE2D1;TGFA;TERF1;CDC25C;CENPE;ESPL1;APC;MSH2;ANAPC4;ANAPC5;NEK2;MAD1L1
positive regulation of peptidyl-tyrosine phosphorylation (GO:0050731)	16/139	0.372079	0.880588	2.69209	-0.342339	EGF;RIPK2;TGFA;ICAM1;KITLG;EHD4;ARL2BP;PPAP2B;DOK7;ABI1;UNC119;CSPG4;RICTOR;HES1;ITGA5;CD44
circulatory system process (GO:0003013)	15/130	0.37522	0.880588	2.79337	-0.355219	BBS2;EDN1;EDN2;GPX1;GCH1;NPR1;EPB41;ADM;ADRB2;MANF;TJP1;DLL4;HRH1;GCLC;P2RX4
negative regulation of leukocyte activation (GO:0002695)	14/120	0.367736	0.880588	2.83244	-0.360187	DUSP3;ZC3H8;CBLB;PRDM1;RABGEF1;BCL6;IRF1;PELI1;HMOX1;PTPN6;NFKBID;TNFRSF21;PAG1;CD276
multi-multicellular organism process (GO:0044706)	14/121	0.378438	0.880588	2.88232	-0.36653	HEXB;ADM;LNPEP;FOS;ADIPOR2;ETS1;PGF;DHODH;FOSL1;MAFF;UCP2;GNAS;FOSB;UPRT
carbohydrate transport (GO:0008643)	12/102	0.373466	0.880588	3.14022	-0.399327	SLC35A1;EDN1;G6PC3;SLC35B4;SLC35D1;PEA15;NUP35;SLC2A3;SORBS1;SLC26A6;SLC2A8;PPARD
negative regulation of lymphocyte activation (GO:0051250)	12/102	0.373466	0.880588	3.15904	-0.40172	DUSP3;BCL6;IRF1;PELI1;ZC3H8;CBLB;PTPN6;PRDM1;NFKBID;TNFRSF21;PAG1;CD276
extrinsic apoptotic signaling pathway (GO:0097191)	1992-11-01	0.364167	0.880588	3.1995	-0.406865	WWOX;KITLG;BCL2L11;CASP8;TNFRSF12A;CRADD;KRT8;ITGAV;PIK3R1;FOXO3;DEDD2
canonical Wnt signaling pathway (GO:0060070)	1984-10-01	0.379259	0.880588	3.51529	-0.447022	FZD1;TCF7L2;RARG;APC;PPAP2B;SNAI2;PSEN1;LGR4;SOX4;LRP6
regulation of interleukin-6 production (GO:0032675)	1984-10-01	0.379259	0.880588	3.52532	-0.448298	RABGEF1;CEBPB;RIPK2;C5AR2;CHRNA7;GBA;TNFSF9;NOD1;KLF2;MYD88
positive regulation of adaptive immune response (GO:0002821)	1974-09-01	0.368478	0.880588	3.65956	-0.465368	HLA-H;RIPK2;HLA-C;HLA-A;MR1;PRKCZ;ADA;HLA-E;IL27RA
peptide secretion (GO:0002790)	1956-07-01	0.37182	0.880588	4.38201	-0.557239	ABCA1;EDN1;PCLO;ANXA1;EIF2AK3;SELT;CAMK2G
negative regulation of coagulation (GO:0050819)	1947-06-01	0.372699	0.880588	5.0778	-0.645719	EDN1;UBASH3B;ANXA4;SERPINE1;PLAUR;PLAT
response to nicotine (GO:0035094)	1938-05-01	0.372522	0.880588	5.77833	-0.734801	EDN1;GPX1;HOMER1;CHRNA7;HMOX1
negative regulation of stem cell differentiation (GO:2000737)	1938-05-01	0.372522	0.880588	6.15226	-0.782353	TGFBR3;JAG1;HES1;VASN;BMP5
genitalia development (GO:0048806)	1938-05-01	0.372522	0.880588	6.17736	-0.785544	NCOA3;LGR4;TBX3;ESR2;BMP5
negative regulation of osteoblast differentiation (GO:0045668)	1938-05-01	0.372522	0.880588	6.24709	-0.794412	TWSG1;IGFBP5;ID1;ID3;CCRN4L
long-chain fatty acid transport (GO:0015909)	1938-05-01	0.372522	0.880588	6.35614	-0.808279	PRKAB2;ANXA1;PNPLA8;PLA2G4A;PLIN2
epithelial cell morphogenesis (GO:0003382)	1938-05-01	0.372522	0.880588	6.38057	-0.811386	IFT88;CLIC4;MAP3K1;RILPL2;ID1
cell differentiation in spinal cord (GO:0021515)	1938-05-01	0.372522	0.880588	6.48302	-0.824414	ISL2;LMO4;TCTN1;CLN8;SOX4
amino sugar metabolic process (GO:0006040)	1938-05-01	0.372522	0.880588	6.49282	-0.82566	CMAS;GFPT2;UAP1;NPL;ST3GAL1
negative regulation of Ras protein signal transduction (GO:0046580)	1938-05-01	0.372522	0.880588	6.51872	-0.828953	RABGEF1;BCL6;TNK1;MFN2;ARHGAP24
regulation of sodium ion transmembrane transport (GO:1902305)	1938-05-01	0.372522	0.880588	6.72151	-0.854741	SLC9A3R1;CNKSR3;ATP2B4;GLRX;ATP1B2
regulation of fibroblast growth factor receptor signaling pathway (GO:0040036)	2016-04-29	0.370352	0.880588	8.13994	-1.03512	TCF7L2;DSTYK;THBS1;DUSP6
cardiac muscle cell differentiation (GO:0055007)	2016-04-29	0.370352	0.880588	8.54607	-1.08676	MESP1;IFT88;TBX3;SLC9A1
lipopolysaccharide-mediated signaling pathway (GO:0031663)	2016-04-29	0.370352	0.880588	8.5619	-1.08878	SCARB1;RIPK2;IRAK2;MYD88
embryonic cranial skeleton morphogenesis (GO:0048701)	2016-04-29	0.370352	0.880588	8.69081	-1.10517	WDR19;EIF4A3;GNAS;SIX1
regulation of protein autophosphorylation (GO:0031952)	2016-04-29	0.370352	0.880588	8.72235	-1.10918	JUN;RAP2B;NBN;CALM1
central nervous system neuron axonogenesis (GO:0021955)	2016-04-29	0.370352	0.880588	8.8389	-1.124	NR4A2;ARHGEF28;TCTN1;MYCBP2
regulation of heart morphogenesis (GO:2000826)	2016-03-20	0.363861	0.880588	12.15	-1.54506	SIX1;HES1;LRP6
response to arsenic-containing substance (GO:0046685)	2016-03-20	0.363861	0.880588	12.2969	-1.56373	CDKN1A;GCLC;HMOX1
inflammatory response to antigenic stimulus (GO:0002437)	2016-03-20	0.363861	0.880588	12.5029	-1.58993	NOTCH2;PNMA1;CEP152
N-terminal protein amino acid modification (GO:0031365)	2016-03-20	0.363861	0.880588	12.843	-1.63318	PPM1B;METAP1D;NMT2
regulation of protein dephosphorylation (GO:0035304)	2016-03-20	0.363861	0.880588	12.9096	-1.64165	SMPD1;GBA;CALM1
positive regulation of alcohol biosynthetic process (GO:1902932)	2016-03-20	0.363861	0.880588	12.9881	-1.65164	PRKAA1;POR;HRH1
positive regulation of epidermal growth factor receptor signaling pathway (GO:0045742)	2016-03-20	0.363861	0.880588	13.0351	-1.65761	EGF;TGFA;HAP1
plasma lipoprotein particle clearance (GO:0034381)	2016-03-20	0.363861	0.880588	13.1188	-1.66826	SCARB1;HMOX1;LMF1
post-anal tail morphogenesis (GO:0036342)	2016-03-20	0.363861	0.880588	13.1816	-1.67624	HES7;LRP6;EPHA2
regulation of Cdc42 GTPase activity (GO:0043088)	2016-03-20	0.363861	0.880588	13.276	-1.68824	BCAS3;ARAP1;ARHGAP27
establishment of spindle orientation (GO:0051294)	2016-03-20	0.363861	0.880588	13.3732	-1.7006	GPSM2;NDE1;CDK5RAP2
detection of external biotic stimulus (GO:0098581)	2016-03-20	0.363861	0.880588	13.3859	-1.70222	SCARB1;NOD1;HLA-A
mitochondrial RNA metabolic process (GO:0000959)	2016-03-20	0.363861	0.880588	13.5133	-1.71842	AARS2;ELAC2;YARS2
hydrogen peroxide catabolic process (GO:0042744)	2016-03-20	0.363861	0.880588	13.5455	-1.72251	GPX1;CAT;HBA1
negative regulation of endothelial cell apoptotic process (GO:2000352)	2016-03-20	0.363861	0.880588	13.5541	-1.72361	SERPINE1;ANGPTL4;ICAM1
apoptotic DNA fragmentation (GO:0006309)	2016-03-20	0.363861	0.880588	13.6926	-1.74122	H1F0;ENDOG;DNASE2
mitotic sister chromatid segregation (GO:0000070)	2016-03-20	0.363861	0.880588	13.7629	-1.75016	ESPL1;NEK2;ZWINT
negative regulation of muscle contraction (GO:0045932)	2016-03-20	0.363861	0.880588	13.8397	-1.75993	RGS2;ADRB2;PTGS2
regulation of homotypic cell-cell adhesion (GO:0034110)	2016-03-20	0.363861	0.880588	14.0772	-1.79012	UBASH3B;ZNF703;CD44
positive regulation of organelle assembly (GO:1902117)	2016-03-20	0.363861	0.880588	14.0871	-1.79139	EDN1;HAP1;ARHGEF5
acidic amino acid transport (GO:0015800)	2016-03-20	0.363861	0.880588	14.2804	-1.81597	SLC1A3;PSEN1;CLN8
negative regulation of glucose import (GO:0046325)	2016-02-12	0.380074	0.880588	24.6336	-3.13253	PRKAA1;PEA15
cardiac chamber formation (GO:0003207)	2016-02-12	0.380074	0.880588	24.9166	-3.16852	MESP1;SOX4
regulation of interleukin-13 production (GO:0032656)	2016-02-12	0.380074	0.880588	25.3109	-3.21866	PRKCZ;TNFRSF21
detection of other organism (GO:0098543)	2016-02-12	0.380074	0.880588	25.429	-3.23368	NOD1;HLA-A
forebrain morphogenesis (GO:0048853)	2016-02-12	0.380074	0.880588	25.4735	-3.23934	HHEX;IFT88
response to muramyl dipeptide (GO:0032495)	2016-02-12	0.380074	0.880588	25.6104	-3.25675	JAG1;RIPK2
regulation of necroptotic process (GO:0060544)	2016-02-12	0.380074	0.880588	25.7792	-3.27821	CASP8;BIRC3
negative regulation of cholesterol transport (GO:0032375)	2016-02-12	0.380074	0.880588	25.8085	-3.28194	EGF;SREBF2
protein-cofactor linkage (GO:0018065)	2016-02-12	0.380074	0.880588	26.0222	-3.30911	CTH;NMT2
positive regulation of glycoprotein biosynthetic process (GO:0010560)	2016-02-12	0.380074	0.880588	26.038	-3.31113	ARFGEF1;TCF7L2
astrocyte differentiation (GO:0048708)	2016-02-12	0.380074	0.880588	26.0488	-3.3125	PPAP2B;VIM
positive regulation of T cell apoptotic process (GO:0070234)	2016-02-12	0.380074	0.880588	26.0563	-3.31345	ZC3H8;NFKBID
negative regulation of sterol transport (GO:0032372)	2016-02-12	0.380074	0.880588	26.1902	-3.33047	EGF;SREBF2
endocrine hormone secretion (GO:0060986)	2016-02-12	0.380074	0.880588	26.2334	-3.33597	SELM;TBX3
cellular response to fluid shear stress (GO:0071498)	2016-02-12	0.380074	0.880588	26.2663	-3.34016	SREBF2;KLF2
iron coordination entity transport (GO:1901678)	2016-02-12	0.380074	0.880588	26.3228	-3.34734	SLC46A1;ABCB7
response to epinephrine (GO:0071871)	2016-02-12	0.380074	0.880588	26.3557	-3.35153	ATP2B4;PPARGC1A
determination of adult lifespan (GO:0008340)	2016-02-12	0.380074	0.880588	26.6309	-3.38652	MSH2;IDE
negative regulation of intrinsic apoptotic signaling pathway in response to DNA damage by p53 class mediator (GO:1902166)	2016-02-12	0.380074	0.880588	26.6659	-3.39098	TAF9B;CD44
beta-amyloid metabolic process (GO:0050435)	2016-02-12	0.380074	0.880588	26.7485	-3.40148	PSEN1;IDE
face development (GO:0060324)	2016-02-12	0.380074	0.880588	26.8625	-3.41597	ALDH1A3;RARG
detection of calcium ion (GO:0005513)	2016-02-12	0.380074	0.880588	27.0497	-3.43978	STIM1;CALM1
chemical homeostasis within a tissue (GO:0048875)	2016-02-12	0.380074	0.880588	27.1501	-3.45254	HOMER1;EPAS1
hemidesmosome assembly (GO:0031581)	2016-02-12	0.380074	0.880588	27.1951	-3.45827	ITGA6;PLEC
carnitine metabolic process (GO:0009437)	2016-02-12	0.380074	0.880588	27.2489	-3.46511	POR;SHMT1
response to water (GO:0009415)	2016-02-12	0.380074	0.880588	27.3993	-3.48423	ATP2B4;KRT8
deoxyribonucleotide biosynthetic process (GO:0009263)	2016-02-12	0.380074	0.880588	27.4025	-3.48465	DTYMK;ADK
UV protection (GO:0009650)	2016-02-12	0.380074	0.880588	27.4045	-3.4849	GPX1;CAT
cerebellar Purkinje cell layer development (GO:0021680)	2016-02-12	0.380074	0.880588	27.453	-3.49106	HSPA5;MYH10
musculoskeletal movement (GO:0050881)	2016-02-12	0.380074	0.880588	27.6958	-3.52194	SPR;CLN8
protein localization to chromosome, centromeric region (GO:0071459)	2016-02-12	0.380074	0.880588	27.7935	-3.53436	CASC5;AURKB
regulation of translational fidelity (GO:0006450)	2016-02-12	0.380074	0.880588	27.8015	-3.53538	LARS2;PRORSD1P
multicellular organismal movement (GO:0050879)	2016-02-12	0.380074	0.880588	27.8037	-3.53566	SPR;CLN8
organelle disassembly (GO:1903008)	2016-02-12	0.380074	0.880588	27.83	-3.539	PLK3;EIF2D
keratan sulfate catabolic process (GO:0042340)	2016-02-12	0.380074	0.880588	27.9312	-3.55188	HEXB;GNS
relaxation of cardiac muscle (GO:0055119)	2016-02-12	0.380074	0.880588	28.0233	-3.56358	RGS2;P2RX4
vagina development (GO:0060068)	2016-02-12	0.380074	0.880588	28.0373	-3.56537	NCOA3;ESR2
response to leptin (GO:0044321)	2016-02-12	0.380074	0.880588	28.2687	-3.59479	BBS2;NR1D1
response to hydroperoxide (GO:0033194)	2016-02-12	0.380074	0.880588	28.2725	-3.59528	GPX1;OXR1
urea metabolic process (GO:0019627)	2016-02-12	0.380074	0.880588	28.3097	-3.60001	ARG2;ASL
mitotic G1/S transition checkpoint (GO:0044819)	2016-02-12	0.380074	0.880588	28.3745	-3.60824	PLK3;RPA2
response to acidic pH (GO:0010447)	2016-02-12	0.380074	0.880588	28.3892	-3.61012	SLC9A1;LGMN
regulation of telomerase activity (GO:0051972)	2016-02-12	0.380074	0.880588	28.4494	-3.61777	PIF1;TERF1
inositol metabolic process (GO:0006020)	2016-02-12	0.380074	0.880588	28.7196	-3.65213	IMPA1;SLC5A3
endothelial cell morphogenesis (GO:0001886)	2016-02-12	0.380074	0.880588	28.88	-3.67253	CLIC4;ID1
positive regulation of RNA splicing (GO:0033120)	2016-02-12	0.380074	0.880588	29.2031	-3.71362	ZPR1;RBM22
microglial cell activation (GO:0001774)	2016-02-12	0.380074	0.880588	29.2421	-3.71858	JUN;CLU
response to manganese ion (GO:0010042)	2016-02-12	0.380074	0.880588	30.0242	-3.81803	SLC11A2;PTGS2
histone H2A acetylation (GO:0043968)	2016-02-12	0.380074	0.880588	30.6876	-3.90239	ING3;YEATS4
amino acid import (GO:0043090)	2016-02-12	0.380074	0.880588	30.8945	-3.9287	SLC1A3;CLN8
ribonucleotide biosynthetic process (GO:0009260)	16/140	0.382054	0.882208	2.80911	-0.35206	PRPS2;SLC26A2;ACOT7;PANK3;NPR1;AK1;ADK;ADM;PAPSS2;DHODH;PAPSS1;IMPDH1;RP2;GNAS;UPRT;ADSS
gonad development (GO:0008406)	13/112	0.381739	0.882208	3.0888	-0.387113	FZD1;TFAP2C;HMGCS1;BIK;NCOA4;ARID5B;BRCA2;KITLG;PRDX4;BCL2L11;MSH2;PITX2;NKX3-1
regulation of adaptive immune response (GO:0002819)	13/112	0.381739	0.882208	3.17008	-0.397299	HLA-H;RIPK2;HLA-C;HLA-A;MR1;PRKCZ;HLA-E;IL27RA;DUSP10;BCL6;IRF1;PTPN6;ADA
glycoprotein metabolic process (GO:0009100)	1975-09-01	0.382129	0.882208	3.93464	-0.49312	EXT1;EDEM3;MANBA;TNIP1;NGLY1;GCNT1;PHLDA1;B4GALT7;PPARD
negative regulation of intrinsic apoptotic signaling pathway (GO:2001243)	1975-09-01	0.382129	0.882208	3.94097	-0.493914	GPX1;TMEM161A;WFS1;SNAI1;SNAI2;HSPB1;TAF9B;CLU;CD44
nucleotide-excision repair (GO:0006289)	1975-09-01	0.382129	0.882208	3.96572	-0.497016	ATXN3;SLX4;NEIL2;OGG1;POLE2;XPA;RPA2;GTF2H2;BRCA2
hormone transport (GO:0009914)	1975-09-01	0.382129	0.882208	3.99419	-0.500583	EDN1;PCLO;ANXA1;SELM;EIF2AK3;ADM;SELT;CAMK2G;TBX3
brain development (GO:0007420)	21/187	0.383238	0.884321	2.71279	-0.333496	FZD1;TCF7L2;BMPR2;CADM1;HMGCS1;TULP3;CXCR4;BRCA2;ESR2;CLN5;ACAT1;PTPRG;CST3;BCL2L11;NDUFS4;PPT1;ALX1;HAP1;BBS7;NES;CDK5RAP2
anion transport (GO:0006820)	48/443	0.384808	0.887493	2.51629	-0.300331	SCARB1;SLC46A1;CLIC4;SLC26A2;SLC35B4;SLC35D1;SLC20A1;STXBP1;ATP10D;SLC1A3;PSEN1;CLN8;GLS;SLC25A26;SLC9A3R1;P2RY6;SCP2;MPC1;MYO6;SLC16A7;SLC38A9;CLCC1;SLC12A6;ATP9B;MFSD2A;SLC19A2;ABCA1;PRELID2;SLC35A1;PRKAB2;SLMO1;ANXA1;ATP8B3;PNPLA8;AKR1C1;ABCC5;PLA2G4A;HBA1;SLC4A7;CLCN5;VDAC3;PLIN2;NFKBIE;SFXN5;SERINC5;SLC26A6;PPARD;PCYOX1
organ morphogenesis (GO:0009887)	44/405	0.385194	0.887574	2.5879	-0.308642	NOTCH2;RARG;WDR48;SPEF2;DLX3;TUFT1;EIF4A3;GBA;GCNT1;SIX1;TULP3;ADM;PSEN1;LRP6;ABLIM1;BCL2L11;PERP;MFN2;ALX1;DGCR6;PHLDA2;PITX2;HOXA5;SOX4;BBS2;TCF7L2;OSR2;WWOX;IFT140;VDR;WDR19;ARID5B;VAX2;TBX3;TGFBR3;ALDH1A3;COL5A1;ASXL2;ID1;GNAS;ID3;ITGA6;TAB1;HOXD9
regulation of cytokine production (GO:0001817)	52/482	0.389691	0.887574	2.69354	-0.321242	SERPINE1;HSPB1;CLU;IL27RA;PANX1;RABGEF1;RPS6KA5;CASP1;CYP1B1;TRIM21;IKBKE;MB21D1;MAP2K3;ANXA1;RIPK2;ANXA4;HLA-A;IL17RC;IL17RA;CD2AP;SIGIRR;PPM1B;RNF125;DDIT3;IRF1;PELI1;TRIM15;TNFRSF21;PTGER4;CEBPB;CHRNA7;C5AR2;GBA;NOD1;ZC3HAV1;PIK3R1;PTGS2;THBS1;PRKCZ;HMOX1;CD58;CD276;CADM1;KLF2;PER1;BCL6;POLR3E;SNAI2;TNFSF9;TRIM38;MYD88;LGR4
negative regulation of cell growth (GO:0030308)	17/150	0.388337	0.887574	2.82582	-0.337018	TSPYL2;CDKN1A;BMPR2;BTG1;CDKN2C;NPR1;TNK1;OSGIN1;SEMA4F;ADIPOR2;SMARCA2;ESR2;BCL6;CCDC85B;PPT1;APBB2;PPARD
regulation of glucose metabolic process (GO:0010906)	1994-11-01	0.388599	0.887574	3.55569	-0.424065	TCF7L2;SLC35B4;IGFBP5;SMEK1;IGFBP3;PDK4;SORBS1;NR1D1;PHLDA2;PPARGC1A;FOXO1
nucleoside monophosphate biosynthetic process (GO:0009124)	1985-10-01	0.392162	0.887574	3.81854	-0.455413	PRPS2;PRPS1;IMPDH1;AK1;ADK;UPRT;ADSS;DCK;ADA;DHODH
regulation of protein localization to plasma membrane (GO:1903076)	1948-06-01	0.389902	0.887574	5.25583	-0.626831	AR;DAB2;NUMB;SORBS1;PIK3R1;EPHA2
cellular monovalent inorganic cation homeostasis (GO:0030004)	1948-06-01	0.389902	0.887574	5.32591	-0.635189	CLIC4;PPT1;ATP1B2;SLC26A6;SLC9A1;CLN5
intrinsic apoptotic signaling pathway by p53 class mediator (GO:0072332)	1948-06-01	0.389902	0.887574	5.3431	-0.637238	WWOX;CDKN1A;MSH2;PERP;TMEM109;BRCA2
positive regulation of stem cell differentiation (GO:2000738)	1939-05-01	0.391663	0.887574	6.27136	-0.747946	DAB2;BAMBI;ZNF703;SNAI1;GCNT2
tight junction assembly (GO:0070830)	1939-05-01	0.391663	0.887574	6.3958	-0.762787	APC;CLDN12;MICALL2;MPP5;F11R
endocrine pancreas development (GO:0031018)	1939-05-01	0.391663	0.887574	6.45864	-0.770282	ANXA1;EIF2AK3;HES1;FOXO1;SOX4
positive regulation of cell-cell adhesion (GO:0022409)	1939-05-01	0.391663	0.887574	6.46936	-0.771561	MYO10;GCNT2;ITGA6;KIFAP3;CD44
bone mineralization (GO:0030282)	1939-05-01	0.391663	0.887574	6.59999	-0.78714	TCF7L2;TUFT1;EIF2AK3;PTGS2;LGR4
embryo implantation (GO:0007566)	1939-05-01	0.391663	0.887574	6.61956	-0.789474	CST3;GRN;PTGS2;PCSK5;PPARD
positive regulation of receptor-mediated endocytosis (GO:0048260)	1939-05-01	0.391663	0.887574	6.63227	-0.79099	DAB2;HIP1;KIF3A;SERPINE1;PPT1
negative regulation of small GTPase mediated signal transduction (GO:0051058)	1939-05-01	0.391663	0.887574	6.77194	-0.807647	RABGEF1;BCL6;TNK1;MFN2;ARHGAP24
regulation of actin filament depolymerization (GO:0030834)	1939-05-01	0.391663	0.887574	6.77903	-0.808493	EPS8;LIMA1;SCIN;SH3BGRL3;SPTAN1
lipid phosphorylation (GO:0046834)	1939-05-01	0.391663	0.887574	6.86709	-0.818995	PI4K2B;IMPA1;BPNT1;PIK3R1;PIP4K2C
positive regulation of receptor activity (GO:2000273)	2016-04-30	0.392247	0.887574	8.8746	-1.05842	EGF;NCOA3;TGFA;HAP1
intrinsic apoptotic signaling pathway in response to DNA damage by p53 class mediator (GO:0042771)	2016-04-30	0.392247	0.887574	8.89439	-1.06078	CDKN1A;MSH2;TMEM109;BRCA2
negative regulation of sequestering of calcium ion (GO:0051283)	2016-04-30	0.392247	0.887574	8.92969	-1.06499	DDIT3;MCOLN1;TPCN2;ERO1L
release of sequestered calcium ion into cytosol (GO:0051209)	2016-04-30	0.392247	0.887574	8.94294	-1.06657	DDIT3;MCOLN1;TPCN2;ERO1L
vasoconstriction (GO:0042310)	2016-04-30	0.392247	0.887574	8.98147	-1.07116	BBS2;EDN1;EDN2;MANF
placenta blood vessel development (GO:0060674)	2016-04-30	0.392247	0.887574	9.07137	-1.08189	FOSL1;NOTCH2;HES1;CYR61
[truncated: 2,556 more rows]

## Sheet: 2000 decreasing NELF genes GOBP
Term	Overlap	P-value	Adjusted P-value	Z-score	Combined Score	Genes
gene expression (GO:0010467)	265/672	0.000000000000000000000000000000000000000000000000000000000000000041112304930644726158845577055916823466930033995884511279999084508505149607721817080312763724663297047983239391726613554234412779486746198264027944667883536326857818465896343695931136608123779296875	1.62928e-61	-2.33938	327.442	EIF4A2;EIF4A1;RPL5;RPL30;RPL3;VARS;RPL32;RPL31;PARS2;HNRNPU;PPP2R2A;CCNC;HNRNPR;EPRS;RPL8;RPL6;CCAR1;RPS15;RPS14;PSMD7;RPS16;PSMD4;TRIM28;RPL18A;RPS19;SNRPD1;PPP2R1A;CLP1;PSMD2;MYC;PSMD3;RPL36;RPL35;PSMD1;RPL38;RPL37;RPS11;JUNB;RPS10;RPL39;RPS13;RPS12;NUP214;RPL23;RPL22;MED4;MED6;SRRM1;XRN1;PSME3;CLNS1A;PSME1;RPL24;TFAM;RPL27;RPL26;RPL29;UBA52;RPL28;ANP32A;DHX9;RPN1;SUPT4H1;LARS;PCBP2;SSR1;PSMF1;…
translation (GO:0006412)	122/264	1.07835e-34	2.13676e-31	-2.36234	166.831	EIF4A2;RPL5;SRP19;EIF4A1;RPL30;RPL3;RPL32;RPL31;RPL10A;RPL8;RPL6;RPS15;RPS14;RPS16;RPL18A;RPS19;RPL36;RPL35;RPL38;RPL37;RPS11;RPS10;RPL39;RPS13;RPS12;RPS9;RPS7;RPS8;EIF1AX;RPS5;RPL23;RPL22;RPS6;MRPS18A;SARS;FTSJ1;EEF1A1;RPL24;RPL27;RPL26;RPL29;UBA52;RPL28;RPN1;MRPL17;TARS;MRPL12;MRPL11;MRPL20;EIF4EBP1;SSR1;RPL41;EIF2B2;MRPL23;EIF2S2;EEF2;MRPL24;RPS26;COPS5;RPS27;EIF2S3;RPS29;RPL27A;RPS20;RPS21;RP…
mRNA processing (GO:0006397)	145/397	4.05519e-32	5.3569e-29	-2.38256	155.096	EIF4A2;EIF4A1;AHCYL1;POP4;HNRNPU;HNRNPR;CCAR1;PNN;ALKBH5;SNRPD1;CLP1;PAPOLA;AQR;SCAF11;SSU72;PRPF4B;THOC2;GTF2F1;THOC5;SRRM1;PRPF6;DDX39A;DDX39B;HNRNPUL1;PDE12;PRPF3;XRN2;SNRPG;SNRNP27;SRSF3;SRSF4;GEMIN6;SNRPE;GEMIN7;SNRPF;SNRNP200;SRSF6;SNRPC;SNRPB;ZCCHC8;KHDRBS1;DHX8;DHX9;PRPF8;PCBP2;SMN2;HSPA8;PRPF38B;FUS;NONO;FAM103A1;MAGOHB;LSM4;SRPK1;HNRNPL;HNRNPM;LSM8;LSM6;CNOT1;CNOT11;HNRNPF;CNOT3;HNRNPD;…
translational initiation (GO:0006413)	85/139	7.35186e-31	7.28386e-28	-2.17923	136.173	EIF4A2;RPL5;EIF4A1;RPL30;RPL3;RPL32;RPL31;RPLP1;RPL8;RPL10A;RPL6;RPS15;RPS4X;RBM4;RPS14;RPS16;RPL18A;RPS19;RPL36;RPLP2;RPL35;DENR;RPL38;RPL37;RPS11;RPS10;RPL39;RPS13;RPS12;RPS9;RPS7;EIF1AX;RPS8;RPS5;RPL23;RPS6;RPL22;RPS3A;RPL37A;RPL24;RPL27;PABPC1;RPL26;RPL29;UBA52;RPL28;RPL10;RPL11;RPS15A;RPL14;EIF4H;EIF4EBP1;RPS3;RPL13;EIF4B;RPL19;ABCF1;RPL41;EIF2B2;RPL23A;EIF2S2;EIF1;RPS26;EIF3M;COPS5;RPS27;EI…
RNA splicing (GO:0008380)	125/313	1.14588e-30	9.08223e-28	-2.33022	145.093	PDCD7;RTCB;HNRNPU;HNRNPR;C14ORF166;CCAR1;PNN;SNRPD1;PPP2R1A;CLP1;PAPOLA;AQR;SCAF11;PRPF4B;THOC2;GTF2F1;THOC5;SRRM1;PRPF6;DDX39A;DDX39B;HNRNPUL1;PRPF3;SNRPG;SNRNP27;SRSF3;SRSF4;GEMIN6;SNRPE;GEMIN7;PPIG;SNRPF;SNRNP200;SRSF6;SNRPC;SNRPB;ZCCHC8;DHX8;DHX9;PRPF8;PCBP2;IVNS1ABP;HSPA8;PRPF38B;FUS;NONO;MAGOHB;LSM4;SRPK1;HNRNPL;HNRNPM;LSM8;LSM6;HNRNPF;HNRNPD;CDK12;HNRNPC;CLASRP;ISY1;RBM25;DDX46;DDX47;USP39…
nuclear-transcribed mRNA catabolic process (GO:0000956)	92/183	1.93588e-28	1.27865e-25	-2.20418	126.341	EIF4A2;EIF4A1;RPL5;SMG1;RPL30;RPL3;RPL32;RPL31;RPLP1;SMG9;PPP2R2A;RPL10A;RPL8;SMG8;RPL6;EDC3;EDC4;RPS4X;RPS15;RPS14;RPS16;RPL18A;RPS19;PPP2R1A;RPL36;RPLP2;RPL35;RPL38;RPL37;RPS11;RPS10;RPL39;RPS13;DIS3L2;RPS12;UPF1;RPS9;RPS7;RPS8;RPS5;RPL23;RPS6;RPL22;PAPD4;RPS3A;XRN1;THRAP3;CSDE1;RPL37A;TUT1;RPL24;RPL27;ETF1;RPL26;PABPC1;RPL29;RPL28;UBA52;RPL10;RPL11;PARN;ZFP36L1;PPP2CA;RPS15A;EXOSC4;ERI1;DHX34;…
establishment of protein localization to organelle (GO:0072594)	115/292	7.64593e-28	4.32869e-25	-2.27653	127.712	SRP19;RPL5;C11ORF73;RPL30;RPL3;RPL32;RPL31;RPL8;RPL10A;TOMM20;IPO7;RPL6;PEX26;TOMM22;RPS15;RPS14;GOLGA4;RPS16;RPL18A;RPS19;CFL1;KPNA6;DAG1;RPL36;PMPCB;LONP2;RPL35;RPL38;RPL37;KPNA2;RPS11;RPS10;RPL39;RPS13;RPS12;NUP214;RPS9;RPS7;RPS8;RPS5;RPL23;RPS6;RPL22;TRNT1;RPL24;CHMP4A;RPL27;RPL26;RPL29;RPL28;UBA52;KPNB1;COX18;RPN1;GRPEL1;GRPEL2;SSR1;HSPA9;FIS1;RPL41;NUP155;HSPA4;RPS26;RPS27;RPS29;RPL27A;RPS2…
mRNA catabolic process (GO:0006402)	93/193	1.12382e-27	5.5671e-25	-2.22974	124.526	EIF4A2;EIF4A1;RPL5;SMG1;RPL30;RPL3;RPL32;RPL31;RPLP1;SMG9;PPP2R2A;RPL10A;RPL8;SMG8;RPL6;EDC3;EDC4;RPS4X;RPS15;RPS14;RPS16;RPL18A;RPS19;PPP2R1A;RPL36;RPLP2;RPL35;RPL38;RPL37;RPS11;RPS10;RPL39;RPS13;DIS3L2;RPS12;UPF1;RPS9;RPS7;RPS8;RPS5;RPL23;RPS6;RPL22;PAPD4;RPS3A;SUPV3L1;XRN1;THRAP3;CSDE1;RPL37A;TUT1;RPL24;RPL27;ETF1;RPL26;PABPC1;RPL29;RPL28;UBA52;RPL10;RPL11;PARN;ZFP36L1;PPP2CA;RPS15A;EXOSC4;ERI…
protein targeting (GO:0006605)	109/273	8.00682e-27	3.52567e-24	-2.28933	123.628	SRP19;RPL5;RPL30;RPL3;RPL32;RPL31;RPL8;RPL10A;TOMM20;RPL6;PEX26;TOMM22;RPS15;RPS14;GOLGA4;RPS16;RPL18A;RPS19;BSG;RPL36;PMPCB;RPL35;LONP2;RPL38;RPL37;RPS11;RPS10;RPL39;RPS13;RPS12;RPS9;RPS7;RPS8;RPS5;RPL23;RPS6;RPL22;TRNT1;CDC37;RPL24;CHMP4A;RPL27;RPL26;RPL29;RPL28;UBA52;RPN1;GABARAP;MYL12A;GRPEL1;GRPEL2;PIP5K1A;SSR1;SPTBN1;HSPA9;FIS1;RPL41;RPS26;RPS27;RPS29;RPL27A;RPS20;RPS21;RPS24;RPS23;YWHAE;YW…
RNA catabolic process (GO:0006401)	97/220	1.62098e-26	6.42395e-24	-2.24499	119.887	EIF4A2;EIF4A1;RPL5;RPL30;RPL3;RPL32;RPL31;PPP2R2A;RPL10A;RPL8;RPL6;EDC3;EDC4;RPS15;RPS14;RPS16;RPL18A;RPS19;PPP2R1A;RPL36;RPL35;RPL38;RPL37;RPS11;RPS10;RPL39;RPS13;RPS12;RPS9;RPS7;RPS8;RPS5;RPL23;RPS6;RPL22;XRN1;XRN2;RPL24;RPL27;RPL26;RPL29;RPL28;UBA52;ZFP36L1;ERI1;DHX34;RPL41;LSM4;RPS26;RPS27;LSM6;RPS29;CNOT1;CNOT11;RPL27A;CNOT3;HNRNPD;RPS20;CNOT8;RPS21;RPS24;RPS23;SMG1;RPLP1;SMG9;SMG8;RPS4X;RPL…
protein localization to organelle (GO:0033365)	131/396	9.89389e-26	3.5645e-23	-2.33834	120.865	SRP19;RPL5;C11ORF73;MTCH2;RPL30;RPL3;RPL32;RPL31;RPL10A;RPL8;TOMM20;IPO7;RPL6;PEX26;TOMM22;RPS15;RPS14;GOLGA4;RPS16;RPL18A;RPS19;CFL1;KPNA6;DAG1;RPL36;PMPCB;LONP2;RPL35;RPL38;RPL37;KPNA2;RPS11;RPS10;RPL39;RPS13;RPS12;NUP214;RPS9;RPS7;RPS8;RPS5;RPL23;RPS6;RPL22;COG3;TINF2;TRNT1;ZW10;RPL24;CHMP4A;RPL27;RPL26;RPL29;UBA52;RPL28;KPNB1;TNKS;RPN1;ARL1;GRPEL1;GRPEL2;SSR1;HSPA9;FIS1;RPL41;NUP155;HSPA4;RCC…
protein localization to endoplasmic reticulum (GO:0070972)	71/118	1.19855e-25	3.9582e-23	-2.08626	107.617	RPL5;SRP19;RPL30;RPL3;RPL32;RPL31;RPLP1;SRP54;RPL8;RPL10A;RPL6;RPS15;RPS4X;RPS14;RPS16;RPL18A;RPS19;RPL36;RPLP2;RPL35;RPL38;RPL37;RPS11;RPS10;RPL39;RPS13;RPS12;RPS9;RPS7;RPS8;RPS5;RPL23;SSR2;RPL22;RPS6;SSR3;RPS3A;SRP9;DDOST;RPL37A;RPL24;CHMP4A;RPL27;RPL26;RPL29;UBA52;RPL28;RPL10;RPN1;RPL11;RPS15A;SRP72;RPL14;RPS3;RPL13;SSR1;SEC11A;RPL19;PEX16;RPL41;RPL23A;RPS26;SPCS3;RPS27;VAPA;RPS29;RPL27A;RPS20…
protein targeting to ER (GO:0045047)	69/111	1.44348e-25	4.40038e-23	-2.08476	107.319	RPL5;SRP19;RPL30;RPL3;RPL32;RPL31;RPLP1;SRP54;RPL8;RPL10A;RPL6;RPS4X;RPS15;RPS14;RPS16;RPS19;RPL18A;RPL36;RPLP2;RPL35;RPL38;RPL37;RPS11;RPS10;RPL39;RPS13;RPS12;RPS9;RPS7;RPS8;RPS5;RPL23;SSR2;RPS6;RPL22;SSR3;RPS3A;SRP9;DDOST;RPL37A;RPL24;CHMP4A;RPL27;RPL26;RPL29;UBA52;RPL28;RPL10;RPN1;RPL11;RPS15A;SRP72;RPL14;RPS3;RPL13;SSR1;SEC11A;RPL19;RPL41;RPL23A;RPS26;SPCS3;RPS27;RPS29;RPL27A;RPS20;RPS21;RPS2…
establishment of protein localization to endoplasmic reticulum (GO:0072599)	70/115	1.59983e-25	4.52865e-23	-2.07465	106.739	RPL5;SRP19;RPL30;RPL3;RPL32;RPL31;RPLP1;SRP54;RPL10A;RPL8;RPL6;RPS4X;RPS15;RPS14;RPS16;RPL18A;RPS19;RPL36;RPLP2;RPL35;RPL38;RPL37;RPS11;RPS10;RPL39;RPS13;RPS12;RPS9;RPS7;RPS8;RPS5;RPL23;SSR2;RPS6;RPL22;SSR3;RPS3A;SRP9;DDOST;RPL37A;RPL24;CHMP4A;RPL27;RPL26;RPL29;UBA52;RPL28;RPL10;RPN1;RPL11;RPS15A;SRP72;RPS3;RPL14;RPL13;SSR1;SEC11A;RPL19;RPL41;RPL23A;RAB10;RPS26;SPCS3;RPS27;RPS29;RPL27A;RPS20;RPS2…
SRP-dependent cotranslational protein targeting to membrane (GO:0006614)	68/108	1.89312e-25	5.00162e-23	-2.07152	106.372	RPL5;SRP19;RPL30;RPL3;RPL32;RPL31;RPLP1;SRP54;RPL8;RPL10A;RPL6;RPS15;RPS4X;RPS14;RPS16;RPL18A;RPS19;RPL36;RPLP2;RPL35;RPL38;RPL37;RPS11;RPS10;RPL39;RPS13;RPS12;RPS9;RPS7;RPS8;RPS5;RPL23;SSR2;RPL22;RPS6;SSR3;RPS3A;SRP9;DDOST;RPL37A;RPL24;RPL27;RPL26;RPL29;UBA52;RPL28;RPL10;RPN1;RPL11;RPS15A;SRP72;RPL14;RPS3;RPL13;SSR1;SEC11A;RPL19;RPL41;RPL23A;RPS26;SPCS3;RPS27;RPS29;RPL27A;RPS20;RPS21;RPS24;RPS23
cotranslational protein targeting to membrane (GO:0006613)	68/110	4.11683e-25	1.01969e-22	-2.0745	105.047	RPL5;SRP19;RPL30;RPL3;RPL32;RPL31;RPLP1;SRP54;RPL8;RPL10A;RPL6;RPS15;RPS4X;RPS14;RPS16;RPL18A;RPS19;RPL36;RPLP2;RPL35;RPL38;RPL37;RPS11;RPS10;RPL39;RPS13;RPS12;RPS9;RPS7;RPS8;RPS5;RPL23;SSR2;RPL22;RPS6;SSR3;RPS3A;SRP9;DDOST;RPL37A;RPL24;RPL27;RPL26;RPL29;UBA52;RPL28;RPL10;RPN1;RPL11;RPS15A;SRP72;RPL14;RPS3;RPL13;SSR1;SEC11A;RPL19;RPL41;RPL23A;RPS26;SPCS3;RPS27;RPS29;RPL27A;RPS20;RPS21;RPS24;RPS23
nuclear-transcribed mRNA catabolic process, nonsense-mediated decay (GO:0000184)	69/117	1.38691e-24	3.23312e-22	-2.10068	103.949	RPL5;SMG1;RPL30;RPL3;RPL32;RPL31;RPLP1;SMG9;PPP2R2A;RPL8;RPL10A;SMG8;RPL6;RPS15;RPS4X;RPS14;RPS16;RPL18A;RPS19;PPP2R1A;RPL36;RPLP2;RPL35;RPL38;RPL37;RPS11;RPS10;RPL39;RPS13;RPS12;UPF1;RPS9;RPS7;RPS8;RPS5;RPL23;RPL22;RPS6;RPS3A;RPL37A;RPL24;ETF1;RPL27;PABPC1;RPL26;RPL29;UBA52;RPL28;RPL10;RPL11;PARN;PPP2CA;RPS15A;RPL14;RPS3;RPL13;RPL19;RPL41;RPL23A;PNRC2;RPS26;RPS27;RPS29;RPL27A;EIF3E;RPS20;RPS21;R…
establishment of protein localization to membrane (GO:0090150)	95/229	1.87486e-24	3.91055e-22	-2.17759	107.34	SRP19;RPL5;RPL30;RPL3;RPL32;RPL31;RPLP1;SRP54;RPL8;RPL10A;RPL6;PEX26;TOMM22;RPS15;RPS4X;RPS14;GOLGA4;RPS16;RPL18A;RPS19;BSG;FLOT1;RPL36;RPLP2;RPL35;RPL38;RPL37;RPS11;RPS10;RPL39;RPS13;RPS12;RPS9;HSP90AA1;RPS7;ANXA2;RPS8;RPS5;RPL23;SSR2;RPL22;RPS6;SSR3;RPS3A;TIMM22;SRP9;DDOST;NPC1;RPL37A;RPL24;CHMP4A;RPL27;RPL26;RPL29;UBA52;RPL28;LAMA5;RPL10;COX18;RPN1;RPL11;TIMM10;MYL12A;SAMM50;RPS15A;SRP72;ASNA1…
translational elongation (GO:0006414)	68/114	1.86861e-24	3.91055e-22	-2.08686	102.868	RPL5;GFM1;RPL30;RPL3;RPL32;RPL31;RPLP1;RPL8;RPL10A;RPL6;RPS15;RPS4X;RPS14;RPS16;RPL18A;RPS19;RPL36;RPLP2;RPL35;RPL38;RPL37;RPS11;RPS10;RPL39;RPS13;RPS12;TSFM;RPS9;RPS7;RPS8;RPS5;RPL23;RPL22;RPS6;RPS3A;TRNAU1AP;MRPL44;TUFM;EEF1G;EEF1A1;RPL37A;RPL24;RPL27;RPL26;RPL29;UBA52;RPL28;ELOF1;RPL10;RPL11;RPS15A;RPL14;RPS3;RPL13;RPL19;RPL41;RPL23A;EEF2;RPS26;RPS27;RPS29;RPL27A;TCEA2;TCEA1;RPS20;RPS21;RPS24;…
macromolecular complex disassembly (GO:0032984)	75/142	2.20593e-24	4.37105e-22	-2.16915	106.683	RPL5;RPL30;RPL3;RPL32;RPL31;RPLP1;RPL8;RPL10A;RPL6;RPS4X;RPS15;RPS14;RPS16;RPL18A;RPS19;KIF5B;CFL1;RPL36;RPLP2;RPL35;DENR;RPL38;RPL37;RPS11;RPS10;RPL39;RPS13;RPS12;SUPT16H;RPS9;SMARCC2;RPS7;RPS8;RPS5;RPL23;RPL22;RPS6;RPS3A;TFIP11;ARID1A;KIF2A;DDIT4;RPL37A;RPL24;ETF1;RPL27;RPL26;RPL29;UBA52;MTRF1L;RPL28;NAPA;NAPB;RPL10;RPL11;KLC1;RPS15A;RPS3;RPL14;RPL13;RPL19;SMARCE1;HSPA8;RPL41;HMGA1;RPL23A;RPS26…
protein targeting to membrane (GO:0006612)	77/156	1.34757e-23	2.54307e-21	-2.15346	102.119	RPL5;SRP19;RPL30;RPL3;RPL32;RPL31;RPLP1;SRP54;RPL8;RPL10A;RPL6;PEX26;RPS15;RPS4X;RPS14;RPS16;RPL18A;RPS19;BSG;RPL36;RPLP2;RPL35;RPL38;RPL37;RPS11;RPS10;RPL39;RPS13;RPS12;RPS9;RPS7;ANXA2;RPS8;RPS5;RPL23;SSR2;RPL22;RPS6;SSR3;RPS3A;SRP9;DDOST;RPL37A;RPL24;CHMP4A;RPL27;RPL26;RPL29;UBA52;RPL28;RPL10;RPN1;RPL11;MYL12A;RPS15A;SRP72;RPL14;RPS3;RPL13;PIP5K1A;SSR1;SEC11A;SPTBN1;RPL19;PEX16;RPL41;RPL23A;RPS…
protein complex disassembly (GO:0043241)	71/132	1.70428e-23	3.07003e-21	-2.15548	101.809	RPL5;RPL30;RPL3;RPL32;RPL31;RPLP1;RPL8;RPL10A;RPL6;RPS4X;RPS15;RPS14;RPS16;RPL18A;RPS19;CFL1;RPL36;RPLP2;RPL35;RPL38;RPL37;RPS11;RPS10;RPL39;RPS13;RPS12;SUPT16H;RPS9;SMARCC2;RPS7;RPS8;RPS5;RPL23;RPL22;RPS6;RPS3A;ARID1A;KIF2A;DDIT4;RPL37A;RPL24;ETF1;RPL27;RPL26;RPL29;UBA52;MTRF1L;RPL28;NAPA;NAPB;RPL10;RPL11;RPS15A;RPL14;RPS3;RPL13;RPL19;SMARCE1;HSPA8;RPL41;HMGA1;RPL23A;RPS26;RPS27;KIF18B;RPS29;RPL…
viral life cycle (GO:0019058)	67/118	3.20999e-23	5.53095e-21	-2.08436	97.2227	RPL5;RPL30;RPL3;RPL32;RPL31;RPLP1;RPL8;RPL10A;RPL6;RPS15;RPS4X;RPS14;XPO1;RPS16;RPL18A;RPS19;RPL36;RPLP2;RPL35;RPL38;RPL37;RPS11;RPS10;RPL39;RPS13;RPS12;RPS9;PDCD6IP;RPS7;RPS8;RPS5;RPL23;RPS6;RPL22;RPS3A;VPS37B;RPL37A;RPL24;CHMP4A;RPL27;RPL26;RPL29;UBA52;PPIA;RPL28;KPNB1;VPS28;SLC25A6;TSG101;RPL10;RPL11;RPS15A;UBC;RPL14;RPS3;RPL13;RPL19;RPL41;RPL23A;RPS26;RPS27;RPS29;RPL27A;RPS20;RPS21;RPS24;RPS23
single-organism cellular localization (GO:1902580)	143/496	3.54872e-23	5.85982e-21	-2.26923	105.715	SRP19;RPL5;C11ORF73;RPL30;RPL3;RPL32;RPL31;RPL8;RPL10A;TOMM20;IPO7;RPL6;PEX26;TOMM22;RPS15;RPS14;GOLGA4;ZFYVE27;RPS16;RPL18A;RPS19;KIF5B;BSG;CFL1;KPNA6;RPL36;DAG1;PMPCB;LONP2;RPL35;RPL38;RPL37;KPNA2;RPS11;RPS10;RPL39;RPS13;RPS12;NUP214;RPS9;RPS7;RPS8;RPS5;RPL23;RPS6;RPL22;ATP1B3;TRNT1;RPL24;CHMP4A;RPL27;RPL26;RPL29;RPL28;UBA52;KPNB1;TMED10;RPN1;MYL12A;RHOT2;RHOT1;GRPEL1;GRPEL2;PIP5K1A;SSR1;SPTBN1…
translational termination (GO:0006415)	59/89	4.57011e-23	7.24453e-21	-2.04417	94.7966	RPL5;RPL30;RPL3;RPL32;RPL31;RPLP1;RPL8;RPL10A;RPL6;RPS15;RPS4X;RPS14;RPS16;RPL18A;RPS19;RPL36;RPLP2;RPL35;RPL38;RPL37;RPS11;RPS10;RPL39;RPS13;RPS12;RPS9;RPS7;RPS8;RPS5;RPL23;RPL22;RPS6;RPS3A;RPL37A;RPL24;ETF1;RPL27;RPL26;RPL29;UBA52;MTRF1L;RPL28;RPL10;RPL11;RPS15A;RPL14;RPS3;RPL13;RPL19;RPL41;RPL23A;RPS26;RPS27;RPS29;RPL27A;RPS20;RPS21;RPS24;RPS23
RNA splicing, via transesterification reactions (GO:0000375)	82/184	8.21817e-23	1.25264e-20	-2.1702	99.4525	ISY1;HNRNPU;HNRNPR;PRPF19;CCAR1;PNN;PTBP1;SART1;SNRPD1;PCF11;SNRNP70;CLP1;PAPOLA;RBM5;AQR;SCAF11;PRPF4B;TFIP11;PLRG1;GTF2F1;SRRM1;SFPQ;PRPF6;DDX39A;DDX39B;NHP2L1;HNRNPUL1;SYF2;HNRNPH1;PRPF3;SNRPG;SRSF3;SRSF4;GEMIN6;SNRPA1;SNRPE;DNAJC8;GEMIN7;PABPC1;SNRPF;SNRNP200;SRSF6;CACTIN;SNRPC;SLU7;SNRPB;ZCCHC8;SF3B4;SF3B5;SF3B2;DHX8;DGCR14;DHX9;SF3B6;SRSF1;DDX23;U2AF1;PRPF8;POLR2B;TRA2B;POLR2C;TRA2A;PCBP2;P…
cellular protein complex disassembly (GO:0043624)	65/113	8.59648e-23	1.26177e-20	-2.08344	95.4617	RPL5;RPL30;RPL3;RPL32;RPL31;RPLP1;RPL8;RPL10A;RPL6;RPS15;RPS4X;RPS14;RPS16;RPL18A;RPS19;CFL1;RPL36;RPLP2;RPL35;RPL38;RPL37;RPS11;RPS10;RPL39;RPS13;RPS12;RPS9;RPS7;RPS8;RPS5;RPL23;RPS6;RPL22;RPS3A;KIF2A;RPL37A;RPL24;ETF1;RPL27;RPL26;RPL29;UBA52;MTRF1L;RPL28;NAPA;NAPB;RPL10;RPL11;RPS15A;RPL14;RPS3;RPL13;RPL19;HSPA8;RPL41;RPL23A;RPS26;RPS27;KIF18B;RPS29;RPL27A;RPS20;RPS21;RPS24;RPS23
viral transcription (GO:0019083)	57/84	1.09636e-22	1.55174e-20	-2.02868	92.5329	RPL5;RPL30;RPL3;RPL32;RPL31;RPLP1;RPL10A;RPL8;RPL6;RPS4X;RPS15;RPS14;RPS16;RPL18A;RPS19;RPL36;RPLP2;RPL35;RPL38;RPL37;RPS11;RPS10;RPL39;RPS13;RPS12;RPS9;RPS7;RPS8;RPS5;RPL23;RPS6;RPL22;RPS3A;RPL37A;RPL24;RPL27;RPL26;RPL29;UBA52;RPL28;RPL10;RPL11;RPS15A;RPS3;RPL14;RPL13;RPL19;RPL41;RPL23A;RPS26;RPS27;RPS29;RPL27A;RPS20;RPS21;RPS24;RPS23
RNA splicing, via transesterification reactions with bulged adenosine as nucleophile (GO:0000377)	80/177	1.38945e-22	1.83546e-20	-2.15287	97.8358	ISY1;HNRNPU;HNRNPR;PRPF19;CCAR1;PTBP1;SART1;PNN;PCF11;SNRPD1;SNRNP70;CLP1;PAPOLA;RBM5;AQR;PRPF4B;TFIP11;PLRG1;GTF2F1;SRRM1;SFPQ;PRPF6;DDX39A;DDX39B;NHP2L1;HNRNPUL1;SYF2;HNRNPH1;PRPF3;SNRPG;SRSF3;SRSF4;SNRPA1;GEMIN6;SNRPE;PABPC1;DNAJC8;GEMIN7;SNRPF;SNRNP200;SRSF6;CACTIN;SNRPC;SLU7;SNRPB;SF3B4;ZCCHC8;SF3B5;SF3B2;DHX8;DGCR14;DHX9;SF3B6;SRSF1;DDX23;U2AF1;PRPF8;POLR2B;POLR2C;TRA2B;PCBP2;TRA2A;POLR2E;S…
mRNA splicing, via spliceosome (GO:0000398)	80/177	1.38945e-22	1.83546e-20	-2.15028	97.7182	ISY1;HNRNPU;HNRNPR;PRPF19;CCAR1;PTBP1;SART1;PNN;PCF11;SNRPD1;SNRNP70;CLP1;PAPOLA;RBM5;AQR;PRPF4B;TFIP11;PLRG1;GTF2F1;SRRM1;SFPQ;PRPF6;DDX39A;DDX39B;NHP2L1;HNRNPUL1;SYF2;HNRNPH1;PRPF3;SNRPG;SRSF3;SRSF4;SNRPA1;GEMIN6;SNRPE;PABPC1;DNAJC8;GEMIN7;SNRPF;SNRNP200;SRSF6;CACTIN;SNRPC;SLU7;SNRPB;SF3B4;ZCCHC8;SF3B5;SF3B2;DHX8;DGCR14;DHX9;SF3B6;SRSF1;DDX23;U2AF1;PRPF8;POLR2B;POLR2C;TRA2B;PCBP2;TRA2A;POLR2E;S…
protein localization to membrane (GO:0072657)	97/276	9.18158e-21	1.17376e-18	-2.21251	91.3463	RPL5;SRP19;RPL30;RPL3;RPL32;RPL31;RPL10A;RPL8;RPL6;PEX26;TOMM22;RPS15;RPS14;GOLGA4;ZFYVE27;RPS16;RPL18A;RPS19;BSG;RPL36;RPL35;RPL38;RPL37;RPS11;RPS10;RPL39;RPS13;RPS12;RPS9;RPS7;RPS8;RPS5;RPL23;RPS6;RPL22;ATP1B3;RPL24;CHMP4A;RPL27;RPL26;RPL29;RPL28;UBA52;RPN1;MYL12A;PIP5K1A;SSR1;SPTBN1;BBS1;RPL41;HSPA4;HPS6;RPS26;RPS27;RPS29;RPL27A;RPS20;RPS21;RPS24;RPS23;RPLP1;SRP54;RPS4X;SUMO1;FLOT1;RPLP2;RAB8A…
ribonucleoprotein complex subunit organization (GO:0071826)	66/145	5.72294e-19	7.0875e-17	-2.18663	81.3113	CELF1;ADAR;USP39;PRPF19;SART1;RPS14;SART3;RPS19;SNRPD1;CLP1;KIF5B;C1QBP;EIF3CL;LUC7L;DENR;RPL38;RBM5;SCAF11;PIH1D1;RPS6;TFIP11;PTBP2;ATXN2L;PRPF6;DDX39B;PRPF3;CLNS1A;SNRPG;LUC7L3;STRAP;RPL24;GEMIN6;SNRPE;GEMIN7;SNRPF;SNRNP200;SRSF6;SNRPC;SLU7;LUC7L2;SNRPB;YTHDC1;SFSWAP;SRSF1;DDX23;KLC1;PRPF8;ATXN2;BMS1;SRSF10;SF3A3;NPM1;FAM103A1;PUM2;EIF3M;EIF3K;EIF3L;EIF3G;EIF3H;EIF3E;EIF3F;EIF3C;EIF3D;LSM14A;EI…
cellular component disassembly (GO:0022411)	106/350	1.18329e-18	1.42102e-16	-2.27687	83.0828	RPL5;RPL30;RPL3;RPL32;RPL31;RPL8;RPL10A;RPL6;RPS15;RPS14;RPS16;CAPNS1;RPL18A;FNTA;RPS19;KIF5B;BSG;CFL1;RPL36;RPL35;DENR;RPL38;RPL37;RPS11;RPS10;RPL39;RPS13;RPS12;NUP214;RPS9;SUPT16H;SMARCC2;NUP210;RPS7;RPS8;RPS5;RPL23;RPS6;RPL22;NUP93;DDIT4;RPL24;RPL27;RPL26;RPL29;RPL28;UBA52;KPNB1;POM121;KLC1;CCNB1;NUP85;HSPA8;NEK9;RPL41;NUP155;HMGA1;NUP153;PTK2;RPS26;RPS27;BMP1;KIF18B;RPS29;RPL27A;RPS20;RPS21;R…
ribonucleoprotein complex assembly (GO:0022618)	63/138	3.24814e-18	3.786e-16	-2.1803	77.4224	CELF1;ADAR;USP39;PRPF19;SART1;RPS14;SART3;RPS19;SNRPD1;CLP1;C1QBP;EIF3CL;LUC7L;DENR;RPL38;RBM5;SCAF11;PIH1D1;RPS6;PTBP2;ATXN2L;PRPF6;DDX39B;PRPF3;CLNS1A;SNRPG;LUC7L3;STRAP;RPL24;GEMIN6;SNRPE;GEMIN7;SNRPF;SNRNP200;SRSF6;SNRPC;SLU7;LUC7L2;SNRPB;YTHDC1;SFSWAP;SRSF1;DDX23;PRPF8;ATXN2;BMS1;SRSF10;SF3A3;NPM1;FAM103A1;PUM2;EIF3M;EIF3K;EIF3L;EIF3G;EIF3H;EIF3E;EIF3F;EIF3C;EIF3D;LSM14A;EIF3A;EIF3B
mitotic cell cycle (GO:0000278)	109/404	3.78169e-16	4.28196e-14	-2.22164	68.3859	PPP2R2A;SMC3;CDC20;PPP1CC;PSMD7;PSMD4;PPP2R1A;PSMD2;PSMD3;CDC27;PSMD1;EP300;NUP214;ANAPC7;NUP210;CSNK2A1;FBXW11;USP3;DYRK1A;CSNK1D;NUP93;CLIP1;ZW10;PSME3;PSME1;AJUBA;UBA52;PSMD12;POM121;PSMD11;CUL1;CDCA8;PKMYT1;ARPP19;ORC5;CCNB1;NUP85;UBC;ORC2;PSMF1;NEK9;NUP155;XRCC2;RCC2;NUP153;CDC6;POLA2;KIF18B;RPS27;CDK4;PHF13;YWHAE;TOP2A;AHCTF1;CDKN1B;NCAPG2;ACTR1A;PCM1;XPO1;WAPAL;EMD;YWHAG;RAB8A;NDEL1;NUDC;H…
ncRNA metabolic process (GO:0034660)	96/332	6.39084e-16	7.03525e-14	-2.2508	68.1662	CARS;TRMU;RPL5;POP7;VARS;DDX47;POP4;PARS2;RRP1;INTS10;RTCB;ADAR;EPRS;MTO1;C14ORF166;RPS15;RPS14;RPS16;RPS19;SNRPD1;CLP1;RARS;CDK5RAP1;UTP14A;DIS3L2;RPS7;NSUN4;RPS8;IMP3;NSUN5;MARS2;PUS1;RPS6;DDX56;SARS;UTP11L;TRNT1;AARSD1;FTSJ1;GTPBP3;DALRD3;XRN1;DKC1;CLNS1A;C1D;SNRPG;TUT1;GARS;GEMIN6;NAF1;SNRPE;GEMIN7;RPL26;SNRPF;SNRPB;METTL2B;RPL11;NOP2;UTP23;SRRT;NOLC1;TARS;HSD17B10;EXOSC4;ERI1;LARS;PES1;RPL14…
posttranscriptional regulation of gene expression (GO:0010608)	111/438	7.79107e-15	8.34487e-13	-2.37729	66.1171	EIF4A2;VARS;TACO1;HNRNPU;PARK7;EPRS;RPS14;LAMP2;ZNF207;RPL38;RPS9;FBXW11;RPS5;USP3;NGDN;COG3;MUL1;ATP1B3;AARSD1;LARP4B;RC3H2;GTPBP4;HCFC1;PPIB;AJUBA;KHDRBS1;DHX9;IREB2;CDKN2AIP;ZFP36L1;FXR1;ATXN2;LARS;EIF4EBP1;TIA1;EIF2B2;UBE2B;UQCC1;PA2G4;EEF2;PUM1;GNB2L1;EIF1;PUM2;CNOT1;CNOT11;CDK4;CAPRIN1;CNOT3;BCL3;HNRNPD;MDM4;IARS;NF2;HNRNPC;CNOT8;LSM14A;EIF4G3;EIF4G2;CELF1;RPS4X;RBM3;RBM4;MTG1;C1QBP;MTG2;EI…
regulation of translation (GO:0006417)	77/264	3.61035e-13	3.76522e-11	-2.3886	57.3327	EIF4A2;VARS;CELF1;TACO1;EPRS;RPS4X;RBM3;RBM4;RPS14;MTG1;MTG2;C1QBP;EIF3CL;RPL38;UPF1;RPS9;RPS5;NGDN;AARSD1;TRNAU1AP;LARP4B;SRP9;RARA;ETF1;PABPC1;PPP1R15B;MTPN;KHDRBS1;SRSF1;IREB2;MALSU1;ZFP36L1;FXR1;ATXN2;LARS;EIF4EBP1;EIF4H;GCN1L1;MAPK1;IGF2BP3;EIF4B;ABCF1;TIA1;NPM1;EIF2B2;UQCC1;PA2G4;EEF2;PUM1;LRPPRC;GNB2L1;PUM2;EIF1;EIF3M;EIF3K;CNOT1;EIF3L;CNOT11;CDK4;CAPRIN1;CNOT3;RPS6KB2;BCL3;EIF3G;HNRNPD;EI…
modification-dependent macromolecule catabolic process (GO:0043632)	93/368	1.48379e-12	1.50776e-10	-2.37032	53.6053	UBXN1;USP33;UBE2D2;FAF1;UBE3A;PTPN23;USP39;FBXO22;HERPUD1;CDC20;PSMD7;PSMD4;PSMD2;PSMD3;CDC27;UBXN8;PSMD1;ARIH1;DIS3L2;USP48;ANAPC7;FBXW11;USP3;UBE4A;RAD23A;YOD1;RBX1;PSMA5;RNF168;PSMA6;PSMA3;PSMA4;PSMA1;PSME3;KCTD13;PSME1;RBCK1;SQSTM1;CACUL1;UBA52;VPS28;CUL9;USP14;CUL7;PSMD12;VCP;USP15;PSMD11;TSG101;UHRF2;USP11;CUL1;DERL1;UBR1;USP19;ZMPSTE24;PSMB6;PSMB7;PSMB4;CCNB1;PSMB5;RNF216;PSMB3;UBR5;UBC;PC…
modification-dependent protein catabolic process (GO:0019941)	92/364	1.95413e-12	1.93605e-10	-2.36213	52.8296	UBXN1;UBE2D2;USP33;FAF1;UBE3A;PTPN23;USP39;FBXO22;HERPUD1;CDC20;PSMD7;PSMD4;PSMD2;PSMD3;CDC27;UBXN8;PSMD1;ARIH1;USP48;ANAPC7;FBXW11;USP3;UBE4A;YOD1;RAD23A;RBX1;PSMA5;RNF168;PSMA6;PSMA3;PSMA4;PSMA1;PSME3;PSME1;KCTD13;RBCK1;CACUL1;UBA52;SQSTM1;VPS28;CUL9;USP14;PSMD12;VCP;CUL7;USP15;PSMD11;TSG101;UHRF2;USP11;DERL1;CUL1;UBR1;USP19;ZMPSTE24;PSMB6;PSMB7;CCNB1;PSMB4;PSMB5;RNF216;PSMB3;PCBP2;UBR5;UBC;PSM…
ncRNA processing (GO:0034470)	70/241	5.0858e-12	4.91586e-10	-2.20513	47.2634	TRMU;RPL5;POP7;DDX47;POP4;RRP1;INTS10;RTCB;ADAR;C14ORF166;MTO1;RPS15;RPS14;RPS16;RPS19;CLP1;CDK5RAP1;UTP14A;RPS7;NSUN4;IMP3;RPS8;NSUN5;PUS1;DDX56;RPS6;SARS;UTP11L;TRNT1;FTSJ1;GTPBP3;DKC1;C1D;TUT1;NAF1;RPL26;METTL2B;RPL11;NOP2;SRRT;UTP23;NOLC1;HSD17B10;EXOSC4;ERI1;PES1;RPL14;EXOSC3;RPP14;EXOSC2;NOP56;NOP58;TRMT10C;SSB;INTS1;KRR1;INTS3;TPRKB;TRMT1;PA2G4;TRIT1;WDR55;TBL3;LSM6;LAS1L;INTS5;TSR2;RPS21;…
ubiquitin-dependent protein catabolic process (GO:0006511)	89/355	6.57665e-12	6.20554e-10	-2.35313	49.8873	UBXN1;USP33;UBE2D2;FAF1;UBE3A;PTPN23;USP39;FBXO22;HERPUD1;CDC20;PSMD7;PSMD4;PSMD2;PSMD3;CDC27;UBXN8;PSMD1;ARIH1;USP48;ANAPC7;FBXW11;USP3;UBE4A;RAD23A;YOD1;RBX1;PSMA5;RNF168;PSMA6;PSMA3;PSMA4;PSMA1;PSME3;KCTD13;PSME1;RBCK1;SQSTM1;CACUL1;UBA52;VPS28;CUL9;USP14;CUL7;PSMD12;VCP;USP15;PSMD11;TSG101;UHRF2;USP11;CUL1;DERL1;UBR1;USP19;PSMB6;PSMB7;CCNB1;PSMB4;PSMB5;RNF216;PSMB3;UBR5;UBC;PCBP2;PSMB1;BUB3;P…
proteolysis involved in cellular protein catabolic process (GO:0051603)	94/391	1.21937e-11	1.12381e-09	-2.36882	48.8131	UBXN1;UBE2D2;USP33;FAF1;UBE3A;PTPN23;USP39;PRPF19;FBXO22;HERPUD1;CDC20;PSMD7;PSMD4;PSMD2;PSMD3;CDC27;UBXN8;PSMD1;LONP2;ARIH1;USP48;ANAPC7;FBXW11;USP3;UBE4A;YOD1;RAD23A;RBX1;PSMA5;RNF168;PSMA6;PSMA3;PSMA4;PSMA1;PSME3;PSME1;KCTD13;RBCK1;CACUL1;UBA52;SQSTM1;VPS28;CUL9;USP14;VCP;CUL7;PSMD12;USP15;PSMD11;TSG101;UHRF2;USP11;DERL1;CUL1;UBR1;USP19;ZMPSTE24;PSMB6;PSMB7;CCNB1;PSMB4;PSMB5;RNF216;PSMB3;PCBP2…
protein polyubiquitination (GO:0000209)	59/186	1.33072e-11	1.19856e-09	-2.14842	44.1331	UBE3C;UBE2D2;UBE3A;PRPF19;FBXO22;NPEPPS;PSMD7;PSMD4;PSMD2;CDC27;PSMD3;PSMD1;TRIM27;ANAPC7;FBXW11;UBE4A;RC3H2;DDB2;PSMA5;RNF168;PSMA6;PSMA3;PSMA4;PSMA1;PSME3;UBE2V2;PSME1;RBCK1;UBE2V1;UBA52;PSMD12;PSMD11;TNKS;MGRN1;PSMB6;PSMB7;PSMB4;PSMB5;RNF216;PSMB3;UBR5;UBC;PSMB1;PSMF1;UBE2H;UBE2B;HUWE1;WWP2;UBE2G1;UBE2W;ITCH;UBOX5;PSMC3;PSMC4;PSMC1;PSMC2;UBE2N;STUB1;UBE2K
regulation of ubiquitin-protein transferase activity (GO:0051438)	40/103	2.30996e-10	2.0343e-08	-2.14196	37.9353	PSMD12;PSMD11;CUL1;PARK7;PSMB6;CDC20;PSMB7;PSMB4;CCNB1;PSMB5;PSMD7;PSMD4;PSMB3;PSMD2;UBC;CDC27;PSMB1;PSMD3;PSMD1;PSMF1;BUB3;ZER1;ANAPC7;FEM1A;FEM1B;PSMA5;PSMA6;PSMA3;PSMA4;PSMA1;PSMC3;PSMC4;PSMC1;PSME3;PSMC2;UBE2N;PSME1;TRIB3;UBA52;MAD2L1
regulation of ligase activity (GO:0051340)	41/108	2.40158e-10	2.06901e-08	-2.13718	37.8145	PSMD12;PSMD11;CUL1;PARK7;PSMB6;CDC20;PSMB7;PSMB4;CCNB1;PSMB5;PSMD7;PSMD4;PSMB3;PSMD2;UBC;PSMB1;PSMD3;CDC27;PSMD1;PSMF1;BUB3;ZER1;FEM1A;ANAPC7;FEM1B;MID1IP1;PSMA5;PSMA6;PSMA3;PSMA4;PSMA1;PSMC3;PSMC4;PSMC1;PSME3;PSMC2;PSME1;UBE2N;TRIB3;UBA52;MAD2L1
negative regulation of ubiquitin-protein ligase activity involved in mitotic cell cycle (GO:0051436)	32/67	2.5757e-10	2.17181e-08	-2.01632	35.5781	PSMD12;PSMD11;CDC20;PSMB6;PSMB7;PSMB4;PSMD7;PSMB5;PSMD4;PSMB3;PSMD2;PSMD3;UBC;CDC27;PSMB1;PSMD1;PSMF1;BUB3;ANAPC7;PSMA5;PSMA6;PSMA3;PSMA4;PSMA1;PSMC3;PSMC4;PSMC1;PSME3;PSMC2;PSME1;UBA52;MAD2L1
antigen processing and presentation of exogenous antigen (GO:0019884)	53/173	4.131e-10	3.41065e-08	-2.18179	37.5133	CLTC;CLTA;KIF11;ACTR1A;PSMD7;PSMD4;AP1G1;PSMD2;PSMD3;PSMD1;B2M;AP2M1;AP1B1;KIF23;TAPBP;PSMA5;PSMA6;DYNC1LI2;PSMA3;PSMA4;KIF2A;PSMA1;PSME3;CANX;PSME1;UBA52;RAB7A;DCTN6;PSMD12;SEC23A;PSMD11;DCTN2;SAR1B;KLC1;PSMB6;PSMB7;PSMB4;PSMB5;RACGAP1;PSMB3;UBC;PSMB1;AP2S1;PSMF1;SEC31A;SEC24A;AP3D1;AP2B1;PSMC3;PSMC4;PSMC1;PSMC2;SEC24C
rRNA metabolic process (GO:0016072)	44/126	4.63408e-10	3.74793e-08	-2.08937	35.7272	RPL5;DDX47;POP4;RRP1;UTP23;NOP2;RPL11;NOLC1;RPS15;RPS14;EXOSC4;RPS16;RPS19;ERI1;PES1;RPL14;EXOSC3;UTP14A;EXOSC2;NOP56;NOP58;RPS7;NIFK;NSUN4;IMP3;RPS8;KRR1;NSUN5;DDX56;RPS6;PA2G4;UTP11L;WDR55;TBL3;LSM6;XRN1;LAS1L;DKC1;C1D;TSR2;NAF1;RPL26;RPS21;RPS24
regulation of ubiquitin-protein ligase activity involved in mitotic cell cycle (GO:0051439)	34/78	4.77671e-10	3.78602e-08	-2.01759	34.4794	PSMD12;PSMD11;CUL1;CDC20;PSMB6;PSMB7;PSMB4;CCNB1;PSMB5;PSMD7;PSMD4;PSMB3;PSMD2;UBC;CDC27;PSMB1;PSMD3;PSMD1;PSMF1;BUB3;ANAPC7;PSMA5;PSMA6;PSMA3;PSMA4;PSMA1;PSMC3;PSMC4;PSMC1;PSME3;PSMC2;PSME1;UBA52;MAD2L1
negative regulation of ligase activity (GO:0051352)	33/74	5.42543e-10	4.13481e-08	-2.04762	34.812	PSMD12;PSMD11;PARK7;PSMB6;CDC20;PSMB7;PSMB4;PSMB5;PSMD7;PSMD4;PSMB3;PSMD2;UBC;PSMB1;PSMD3;CDC27;PSMD1;PSMF1;BUB3;ANAPC7;PSMA5;PSMA6;PSMA3;PSMA4;PSMA1;PSMC3;PSMC4;PSMC1;PSME3;PSMC2;PSME1;UBA52;MAD2L1
negative regulation of ubiquitin-protein transferase activity (GO:0051444)	33/74	5.42543e-10	4.13481e-08	-2.04438	34.7569	PSMD12;PSMD11;PARK7;PSMB6;CDC20;PSMB7;PSMB4;PSMB5;PSMD7;PSMD4;PSMB3;PSMD2;UBC;PSMB1;PSMD3;CDC27;PSMD1;PSMF1;BUB3;ANAPC7;PSMA5;PSMA6;PSMA3;PSMA4;PSMA1;PSMC3;PSMC4;PSMC1;PSME3;PSMC2;PSME1;UBA52;MAD2L1
regulation of cellular amino acid metabolic process (GO:0006521)	30/62	7.31287e-10	5.46809e-08	-2.04675	34.2253	PSMD12;PSMD11;PARK7;OAZ1;OAZ2;PSMB6;PSMB7;PSMB4;PSMD7;PSMB5;PSMD4;PSMB3;PSMD2;PSMD3;PSMB1;PSMD1;PSMF1;NQO1;AZIN1;PSMA5;PSMA6;PSMA3;PSMA4;PSMA1;PSMC3;PSMC4;PSMC1;PSME3;PSMC2;PSME1
antigen processing and presentation of exogenous peptide antigen (GO:0002478)	52/171	7.49052e-10	5.49721e-08	-2.16162	36.1345	CLTC;CLTA;KIF11;ACTR1A;PSMD7;PSMD4;AP1G1;PSMD2;PSMD3;PSMD1;B2M;AP2M1;AP1B1;KIF23;TAPBP;PSMA5;PSMA6;DYNC1LI2;PSMA3;PSMA4;KIF2A;PSMA1;PSME3;CANX;PSME1;UBA52;RAB7A;DCTN6;PSMD12;SEC23A;PSMD11;DCTN2;SAR1B;KLC1;PSMB6;PSMB7;PSMB4;PSMB5;RACGAP1;PSMB3;UBC;PSMB1;AP2S1;PSMF1;SEC31A;SEC24A;AP2B1;PSMC3;PSMC4;PSMC1;PSMC2;SEC24C
positive regulation of ubiquitin-protein ligase activity involved in mitotic cell cycle (GO:0051437)	32/72	1.05551e-09	7.60539e-08	-2.00754	32.9072	PSMD12;PSMD11;CUL1;CDC20;PSMB6;PSMB7;CCNB1;PSMB4;PSMD7;PSMB5;PSMD4;PSMB3;PSMD2;PSMD3;UBC;CDC27;PSMB1;PSMD1;PSMF1;ANAPC7;PSMA5;PSMA6;PSMA3;PSMA4;PSMA1;PSMC3;PSMC4;PSMC1;PSME3;PSMC2;PSME1;UBA52
rRNA processing (GO:0006364)	42/120	1.08551e-09	7.68191e-08	-2.06091	33.7615	RPL5;DDX47;POP4;RPL11;RRP1;NOP2;UTP23;NOLC1;RPS15;RPS14;EXOSC4;RPS16;RPS19;ERI1;PES1;RPL14;EXOSC3;UTP14A;EXOSC2;NOP56;NOP58;RPS7;NSUN4;IMP3;KRR1;RPS8;NSUN5;DDX56;RPS6;PA2G4;UTP11L;WDR55;TBL3;LSM6;LAS1L;DKC1;C1D;TSR2;NAF1;RPL26;RPS21;RPS24
anaphase-promoting complex-dependent proteasomal ubiquitin-dependent protein catabolic process (GO:0031145)	34/82	1.33957e-09	9.31356e-08	-2.04117	33.0449	PSMD12;PSMD11;CUL1;PSMB6;CDC20;PSMB7;PSMB4;CCNB1;PSMB5;PSMD7;PSMD4;PSMB3;PSMD2;PSMB1;PSMD3;UBC;CDC27;PSMD1;PSMF1;BUB3;ANAPC7;PSMA5;PSMA6;PSMA3;PSMA4;PSMA1;PSMC3;PSMC4;PSMC1;PSME3;PSMC2;PSME1;UBA52;MAD2L1
regulation of protein modification by small protein conjugation or removal (GO:1903320)	61/228	1.79474e-09	1.2263e-07	-2.16191	34.4049	UBXN1;PARK7;FBXO22;HERPUD1;CDC20;PSMD7;PSMD4;PSMD2;CDC27;PSMD3;HMG20B;PSMD1;DAXX;ZER1;ANAPC7;PRMT3;MUL1;TICAM1;GTPBP4;PSMA5;PSMA6;PSMA3;PSMA4;PSMA1;PSME3;PSME1;TRIB3;UBA52;VPS28;PSMD12;VCP;PSMD11;CUL1;PSMB6;PSMB7;PSMB4;CCNB1;PSMB5;PSMB3;NDNL2;UBR5;UBC;PSMB1;UBQLN1;BUB3;PSMF1;ATG7;FEM1A;FEM1B;PTK2;DNAJA1;FKBP1A;ITCH;PSMC3;PSMC4;DNAJA3;PSMC1;PSMC2;UBE2N;STUB1;MAD2L1
antigen processing and presentation of peptide antigen (GO:0048002)	53/185	2.95018e-09	1.98162e-07	-2.15248	33.2218	CLTC;CLTA;KIF11;NPEPPS;ACTR1A;PSMD7;PSMD4;AP1G1;PSMD2;PSMD3;PSMD1;B2M;AP2M1;AP1B1;KIF23;TAPBP;PSMA5;PSMA6;DYNC1LI2;PSMA3;PSMA4;KIF2A;PSMA1;PSME3;CANX;PSME1;UBA52;RAB7A;DCTN6;PSMD12;SEC23A;PSMD11;DCTN2;SAR1B;KLC1;PSMB6;PSMB7;PSMB4;PSMB5;RACGAP1;PSMB3;UBC;PSMB1;AP2S1;PSMF1;SEC31A;SEC24A;AP2B1;PSMC3;PSMC4;PSMC1;PSMC2;SEC24C
positive regulation of ubiquitin-protein transferase activity (GO:0051443)	34/87	4.49227e-09	2.96714e-07	-2.07799	31.2333	PSMD12;PSMD11;CUL1;PSMB6;CDC20;PSMB7;PSMB4;CCNB1;PSMB5;PSMD7;PSMD4;PSMB3;PSMD2;UBC;PSMB1;PSMD3;CDC27;PSMD1;PSMF1;ANAPC7;PSMA5;PSMA6;PSMA3;PSMA4;PSMA1;PSMC3;PSMC4;PSMC1;PSME3;PSMC2;PSME1;UBE2N;TRIB3;UBA52
positive regulation of ligase activity (GO:0051351)	35/92	4.68363e-09	3.04282e-07	-2.07268	31.1011	PSMD12;PSMD11;CUL1;CDC20;PSMB6;PSMB7;PSMB4;CCNB1;PSMB5;PSMD7;PSMD4;PSMB3;PSMD2;UBC;CDC27;PSMB1;PSMD3;PSMD1;PSMF1;ANAPC7;MID1IP1;PSMA5;PSMA6;PSMA3;PSMA4;PSMA1;PSMC3;PSMC4;PSME3;PSMC1;PSMC2;UBE2N;PSME1;TRIB3;UBA52
regulation of protein ubiquitination (GO:0031396)	57/212	5.25808e-09	3.36093e-07	-2.13665	31.8486	UBXN1;PARK7;FBXO22;HERPUD1;CDC20;PSMD7;PSMD4;PSMD2;PSMD3;CDC27;PSMD1;DAXX;ZER1;ANAPC7;PRMT3;TICAM1;GTPBP4;PSMA5;PSMA6;PSMA3;PSMA4;PSMA1;PSME3;PSME1;TRIB3;UBA52;VPS28;PSMD12;PSMD11;CUL1;PSMB6;PSMB7;PSMB4;CCNB1;PSMB5;NDNL2;PSMB3;UBR5;UBC;PSMB1;UBQLN1;PSMF1;BUB3;ATG7;FEM1A;FEM1B;PTK2;DNAJA1;FKBP1A;PSMC3;PSMC4;DNAJA3;PSMC1;PSMC2;UBE2N;STUB1;MAD2L1
negative regulation of protein ubiquitination (GO:0031397)	39/113	5.83614e-09	3.67121e-07	-2.07177	30.6986	PSMD12;UBXN1;PSMD11;PARK7;PSMB6;CDC20;PSMB7;PSMB4;PSMB5;PSMD7;PSMD4;PSMB3;PSMD2;UBR5;UBC;CDC27;PSMB1;PSMD3;PSMD1;PSMF1;BUB3;ANAPC7;PRMT3;GTPBP4;DNAJA1;PSMA5;PSMA6;PSMA3;PSMA4;PSMA1;PSMC3;PSMC4;PSMC1;PSME3;PSMC2;PSME1;UBA52;VPS28;MAD2L1
ribonucleoprotein complex biogenesis (GO:0022613)	28/61	6.64311e-09	4.11354e-07	-1.95202	28.7021	RPL5;RRN3;RPL11;MALSU1;SDAD1;RPS15;RPS16;RPS19;MTG1;PES1;MTG2;RPL14;SURF6;ABCF1;RPS7;RPS6;UTP11L;GNL2;GTPBP4;LSG1;GNL3L;NHP2L1;NOA1;NAF1;RPL26;RPS21;RSL24D1;RPS24
negative regulation of protein modification by small protein conjugation or removal (GO:1903321)	40/119	6.88769e-09	4.19937e-07	-2.05679	30.2003	PSMD12;PSMD11;UBXN1;PARK7;PSMB6;CDC20;PSMB7;PSMB4;PSMD7;PSMB5;PSMD4;PSMB3;PSMD2;UBR5;PSMB1;PSMD3;UBC;CDC27;PSMD1;HMG20B;PSMF1;BUB3;ANAPC7;PRMT3;GTPBP4;PSMA5;DNAJA1;PSMA6;PSMA3;PSMA4;PSMA1;PSMC3;PSMC4;PSMC1;PSME3;PSMC2;PSME1;UBA52;VPS28;MAD2L1
cellular component biogenesis (GO:0044085)	34/89	7.12467e-09	4.27804e-07	-2.02015	29.6247	RPL5;RRN3;RPL11;MALSU1;SDAD1;RPS15;RPS16;RPS19;MTG1;MTG2;PES1;RPL14;SURF6;COX14;ABCF1;PEX16;RPS7;UQCC1;RPS6;UTP11L;GNL2;GTPBP4;LSG1;GNL3L;NDUFS8;NHP2L1;NOA1;NDUFS5;SDHAF1;NAF1;RPL26;RPS21;RSL24D1;RPS24
signal transduction involved in DNA damage checkpoint (GO:0072422)	30/71	8.77395e-09	5.11341e-07	-2.05538	29.7748	PSMD12;CDKN1B;PSMD11;PRPF19;PSMB6;PSMB7;PSMB4;PSMD7;PSMB5;PSMD4;PSMB3;PSMD2;UBC;PSMB1;PSMD3;PSMD1;PSMF1;PSMA5;PSMA6;PSMA3;PSMA4;PSMA1;PSMC3;RFWD2;PSMC4;PSMC1;PSME3;PSMC2;PSME1;UBA52
signal transduction involved in DNA integrity checkpoint (GO:0072401)	30/71	8.77395e-09	5.11341e-07	-2.0521	29.7271	PSMD12;CDKN1B;PSMD11;PRPF19;PSMB6;PSMB7;PSMB4;PSMB5;PSMD7;PSMD4;PSMB3;PSMD2;UBC;PSMB1;PSMD3;PSMD1;PSMF1;PSMA5;PSMA6;PSMA3;PSMA4;PSMA1;PSMC3;RFWD2;PSMC4;PSMC1;PSME3;PSMC2;PSME1;UBA52
DNA damage response, signal transduction by p53 class mediator resulting in cell cycle arrest (GO:0006977)	29/67	1.01252e-08	5.81537e-07	-2.03608	29.2332	PSMD12;CDKN1B;PSMD11;PSMB6;PSMB7;PSMB4;PSMD7;PSMB5;PSMD4;PSMB3;PSMD2;PSMD3;UBC;PSMB1;PSMD1;PSMF1;PSMA5;PSMA6;PSMA3;PSMA4;PSMA1;PSMC3;RFWD2;PSMC4;PSMC1;PSME3;PSMC2;PSME1;UBA52
proteasome-mediated ubiquitin-dependent protein catabolic process (GO:0043161)	55/205	1.03697e-08	5.87071e-07	-2.11595	30.3599	UBXN1;FAF1;CDC20;PSMD7;PSMD4;PSMD2;CDC27;PSMD3;UBXN8;PSMD1;ANAPC7;FBXW11;RAD23A;YOD1;RBX1;PSMA5;PSMA6;PSMA3;PSMA4;PSMA1;PSME3;KCTD13;PSME1;RBCK1;UBA52;PSMD12;VCP;PSMD11;CUL1;DERL1;USP19;PSMB6;PSMB7;PSMB4;CCNB1;PSMB5;RNF216;PSMB3;PCBP2;UBC;PSMB1;PSMF1;BUB3;CRBN;UBE2B;SYVN1;WWP2;UBE2W;PSMC3;PSMC4;PSMC1;PSMC2;STUB1;NFE2L2;MAD2L1
signal transduction involved in cell cycle checkpoint (GO:0072395)	30/72	1.13115e-08	6.31372e-07	-2.04771	29.2318	PSMD12;CDKN1B;PSMD11;PRPF19;PSMB6;PSMB7;PSMB4;PSMB5;PSMD7;PSMD4;PSMB3;PSMD2;UBC;PSMB1;PSMD3;PSMD1;PSMF1;PSMA5;PSMA6;PSMA3;PSMA4;PSMA1;PSMC3;RFWD2;PSMC4;PSMC1;PSME3;PSMC2;PSME1;UBA52
proteasomal protein catabolic process (GO:0010498)	56/212	1.20826e-08	6.65044e-07	-2.10756	29.9768	UBXN1;FAF1;PRPF19;CDC20;PSMD7;PSMD4;PSMD2;PSMD3;CDC27;UBXN8;PSMD1;ANAPC7;FBXW11;RAD23A;YOD1;RBX1;PSMA5;PSMA6;PSMA3;PSMA4;PSMA1;PSME3;KCTD13;PSME1;RBCK1;UBA52;PSMD12;VCP;PSMD11;CUL1;DERL1;USP19;PSMB6;PSMB7;PSMB4;CCNB1;PSMB5;RNF216;PSMB3;PCBP2;UBC;PSMB1;PSMF1;BUB3;CRBN;UBE2B;SYVN1;WWP2;UBE2W;PSMC3;PSMC4;PSMC1;PSMC2;STUB1;NFE2L2;MAD2L1
intracellular signal transduction involved in G1 DNA damage checkpoint (GO:1902400)	29/68	1.31448e-08	7.03957e-07	-2.03138	28.7776	PSMD12;CDKN1B;PSMD11;PSMB6;PSMB7;PSMB4;PSMB5;PSMD7;PSMD4;PSMB3;PSMD2;UBC;PSMB1;PSMD3;PSMD1;PSMF1;PSMA5;PSMA6;PSMA3;PSMA4;PSMA1;PSMC3;RFWD2;PSMC4;PSMC1;PSME3;PSMC2;PSME1;UBA52
signal transduction involved in mitotic G1 DNA damage checkpoint (GO:0072431)	29/68	1.31448e-08	7.03957e-07	-2.02844	28.736	PSMD12;CDKN1B;PSMD11;PSMB6;PSMB7;PSMB4;PSMD7;PSMB5;PSMD4;PSMB3;PSMD2;UBC;PSMB1;PSMD3;PSMD1;PSMF1;PSMA5;PSMA6;PSMA3;PSMA4;PSMA1;PSMC3;RFWD2;PSMC4;PSMC1;PSME3;PSMC2;PSME1;UBA52
signal transduction involved in mitotic DNA damage checkpoint (GO:1902402)	29/69	1.69912e-08	8.74495e-07	-2.02724	28.2792	PSMD12;CDKN1B;PSMD11;PSMB6;PSMB7;PSMB4;PSMD7;PSMB5;PSMD4;PSMB3;PSMD2;UBC;PSMB1;PSMD3;PSMD1;PSMF1;PSMA5;PSMA6;PSMA3;PSMA4;PSMA1;PSMC3;RFWD2;PSMC4;PSMC1;PSME3;PSMC2;PSME1;UBA52
signal transduction involved in mitotic DNA integrity checkpoint (GO:1902403)	29/69	1.69912e-08	8.74495e-07	-2.02396	28.2334	PSMD12;CDKN1B;PSMD11;PSMB6;PSMB7;PSMB4;PSMD7;PSMB5;PSMD4;PSMB3;PSMD2;UBC;PSMB1;PSMD3;PSMD1;PSMF1;PSMA5;PSMA6;PSMA3;PSMA4;PSMA1;PSMC3;RFWD2;PSMC4;PSMC1;PSME3;PSMC2;PSME1;UBA52
signal transduction involved in mitotic cell cycle checkpoint (GO:0072413)	29/69	1.69912e-08	8.74495e-07	-2.02044	28.1844	PSMD12;CDKN1B;PSMD11;PSMB6;PSMB7;PSMB4;PSMD7;PSMB5;PSMD4;PSMB3;PSMD2;UBC;PSMB1;PSMD3;PSMD1;PSMF1;PSMA5;PSMA6;PSMA3;PSMA4;PSMA1;PSMC3;RFWD2;PSMC4;PSMC1;PSME3;PSMC2;PSME1;UBA52
antigen processing and presentation of peptide antigen via MHC class I (GO:0002474)	36/104	2.09407e-08	1.06395e-06	-1.99047	27.376	PSMD12;SEC23A;PSMD11;SAR1B;PSMB6;NPEPPS;PSMB7;PSMB4;PSMB5;PSMD7;PSMD4;PSMB3;PSMD2;UBC;PSMB1;PSMD3;PSMD1;PSMF1;B2M;SEC31A;SEC24A;TAPBP;PSMA5;PSMA6;PSMA3;PSMA4;PSMA1;PSMC3;PSMC4;PSMC1;PSME3;CANX;PSMC2;PSME1;SEC24C;UBA52
negative regulation of cell cycle process (GO:0010948)	62/254	2.49998e-08	1.2541e-06	-2.1982	29.8715	TOP2A;MDC1;ATF2;CDKN1B;SMC3;PRPF19;CDC20;PSMD7;PSMD4;GSG2;PSMD2;CDC27;PSMD3;ZNF207;WAPAL;PSMD1;CSNK2A1;ANAPC7;RPS6;MIF;THOC5;PSMA5;PSMA6;PSMA3;PSMA4;DDX39B;NME6;PSMA1;SYF2;ZW10;PSME3;PSME1;RPL24;UBA52;PSMD12;PSMD11;PRCC;PSMB6;PSMB7;PSMB4;CCNB1;PSMB5;PSMB3;UBC;PSMB1;BUB3;PSMF1;BUB1;NPM1;INTS3;CDK9;PSMC3;RFWD2;CDK4;PSMC4;RFWD3;PSMC1;CCNG1;PSMC2;NABP2;MDM4;MAD2L1
regulation of cell cycle arrest (GO:0071156)	36/105	2.55835e-08	1.26734e-06	-2.0843	28.3018	PSMD12;CDKN1B;PSMD11;UHRF2;PSMB6;PSMB7;PSMB4;PSMD7;PSMB5;PSMD4;PSMB3;PSMD2;UBC;PSMB1;PSMD3;PSMD1;PSMF1;MIF;PSMA5;CDK9;PSMA6;PSMA3;MED25;PSMA4;PSMA1;PSMC3;MYBBP1A;RFWD2;PSMC4;CDK4;PSMC1;PSME3;PSMC2;PSME1;MDM4;UBA52
positive regulation of cell cycle arrest (GO:0071158)	32/85	2.59177e-08	1.26805e-06	-2.06784	28.0772	PSMD12;CDKN1B;PSMD11;UHRF2;PSMB6;PSMB7;PSMB4;PSMB5;PSMD7;PSMD4;PSMB3;PSMD2;UBC;PSMB1;PSMD3;PSMD1;PSMF1;PSMA5;PSMA6;PSMA3;MED25;PSMA4;PSMA1;PSMC3;MYBBP1A;RFWD2;PSMC4;PSMC1;PSME3;PSMC2;PSME1;UBA52
antigen processing and presentation (GO:0019882)	57/225	3.09732e-08	1.49691e-06	-2.12513	28.5024	CLTC;CLTA;KIF11;NPEPPS;ACTR1A;PSMD7;PSMD4;AP1G1;PSMD2;PSMD3;PSMD1;B2M;AP2M1;AP1B1;KIF23;TAPBP;PSMA5;PSMA6;DYNC1LI2;PSMA3;PSMA4;KIF2A;PSMA1;PSME3;CANX;PSME1;UBA52;RAB7A;DCTN6;PSMD12;SEC23A;PSMD11;DCTN2;SAR1B;KLC1;PSMB6;PSMB7;PSMB4;PSMB5;RACGAP1;PSMB3;UBC;PSMB1;AP2S1;PSMF1;MICA;MICB;SEC31A;SEC24A;AP3D1;AP2B1;RAB10;PSMC3;PSMC4;PSMC1;PSMC2;SEC24C
regulation of cellular amine metabolic process (GO:0033238)	31/82	3.94784e-08	1.88498e-06	-1.93625	25.5228	PSMD12;PSMD11;PARK7;OAZ1;OAZ2;PSMB6;PSMB7;PSMB4;PSMB5;PSMD7;PSMD4;PSMB3;PSMD2;PSMB1;PSMD3;PSMD1;PSMF1;LDLR;NQO1;AZIN1;PSMA5;PSMA6;PSMA3;PSMA4;PSMA1;PSMC3;PSMC4;PSMC1;PSME3;PSMC2;PSME1
nucleobase-containing compound transport (GO:0015931)	49/180	4.47534e-08	2.1114e-06	-2.06419	26.9752	AHCTF1;SMG1;NXT1;SLC35B1;C14ORF166;ALKBH5;XPO1;NDC1;NUP214;UPF1;NUP210;THOC2;THOC5;SRRM1;NUP93;DDX19B;SLC25A17;DDX39A;DDX39B;ZC3H11A;SRSF3;SRSF4;NUP54;SRSF6;SLC25A6;SLC29A2;POM121;TNKS;MVP;SRSF1;U2AF1;IWS1;ATXN2;POM121C;NUP85;IGF2BP3;NUP43;SRSF10;SLC25A24;SLC35A2;RANBP2;NUP155;NUP153;MAGOHB;LRPPRC;XPOT;BUD13;NUPL2;NUPL1
negative regulation of mitotic cell cycle phase transition (GO:1901991)	51/192	4.63473e-08	2.16087e-06	-2.11596	27.6027	TOP2A;MDC1;ATF2;CDKN1B;CDC20;PSMD7;PSMD4;GSG2;PSMD2;PSMD3;CDC27;ZNF207;PSMD1;ANAPC7;CSNK2A1;RPS6;PSMA5;PSMA6;PSMA3;PSMA4;PSMA1;SYF2;ZW10;PSME3;PSME1;RPL24;UBA52;PSMD12;PSMD11;PRCC;PSMB6;PSMB7;PSMB4;CCNB1;PSMB5;PSMB3;UBC;PSMB1;PSMF1;BUB3;BUB1;INTS3;PSMC3;PSMC4;RFWD2;PSMC1;RFWD3;PSMC2;CCNG1;NABP2;MAD2L1
[truncated: 3,878 more rows]
