# Supplementary figures and images for: Oxidative stress rapidly stabilizes promoter-proximal paused Pol II across the human genome
Source: Oxford University Press journal article supplement (doi:10.1093/nar/gkx724), 2017-08-09

2A

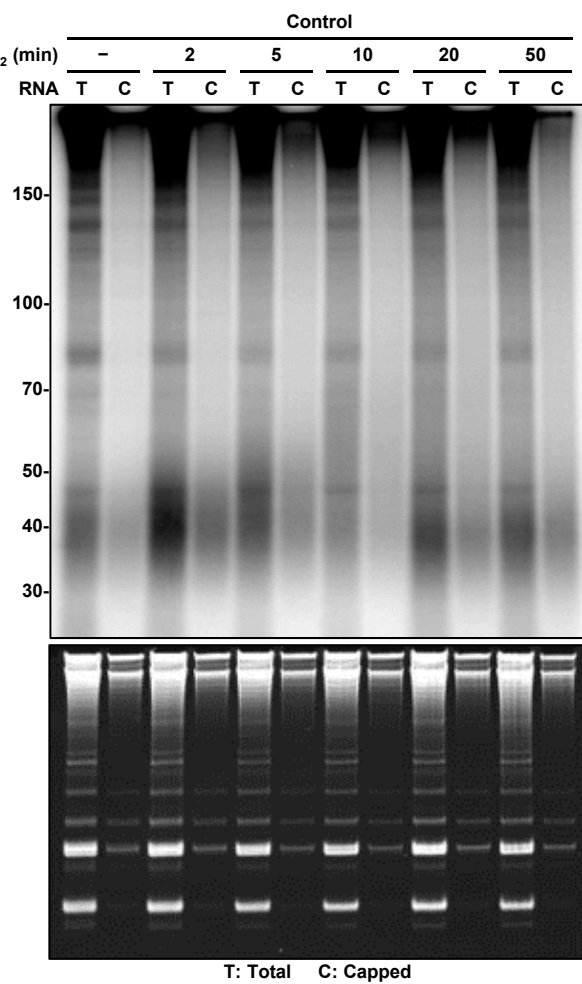

2B

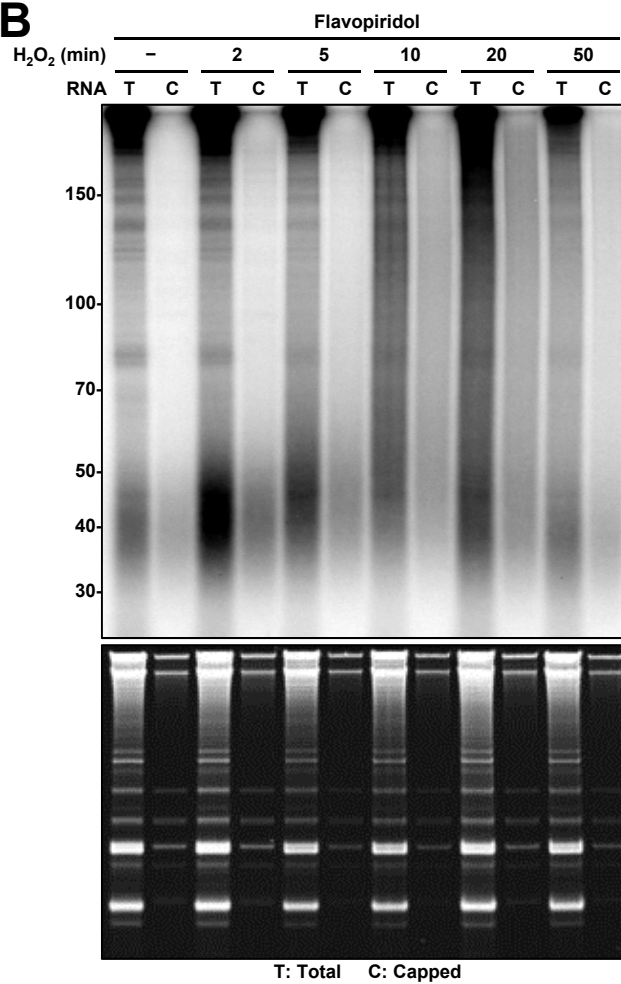

2C-D

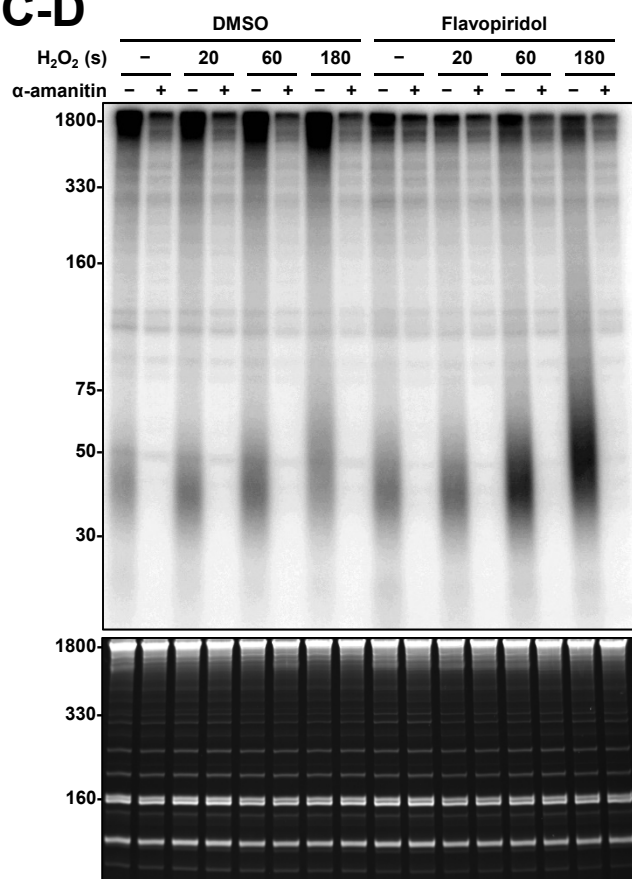

2E/S2D

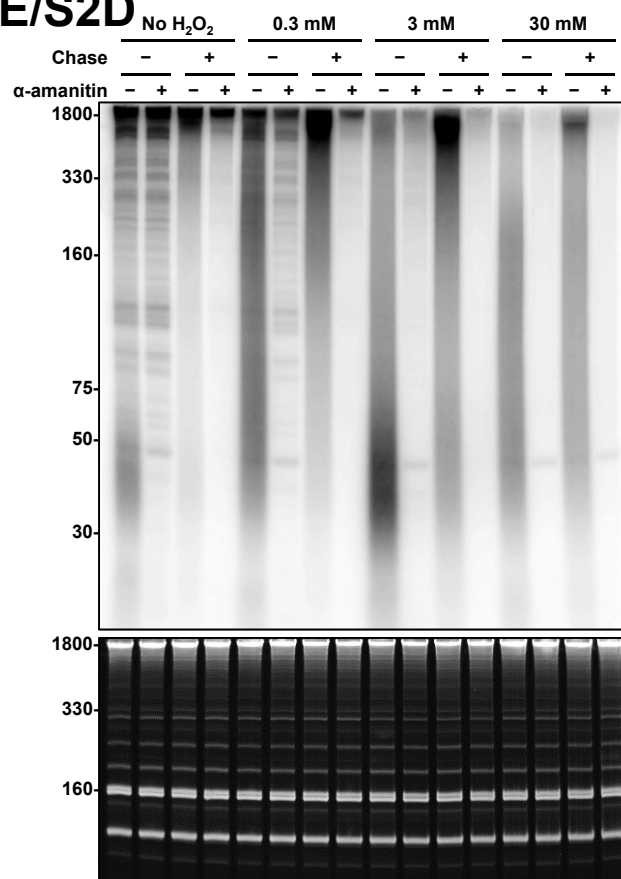

# S2A

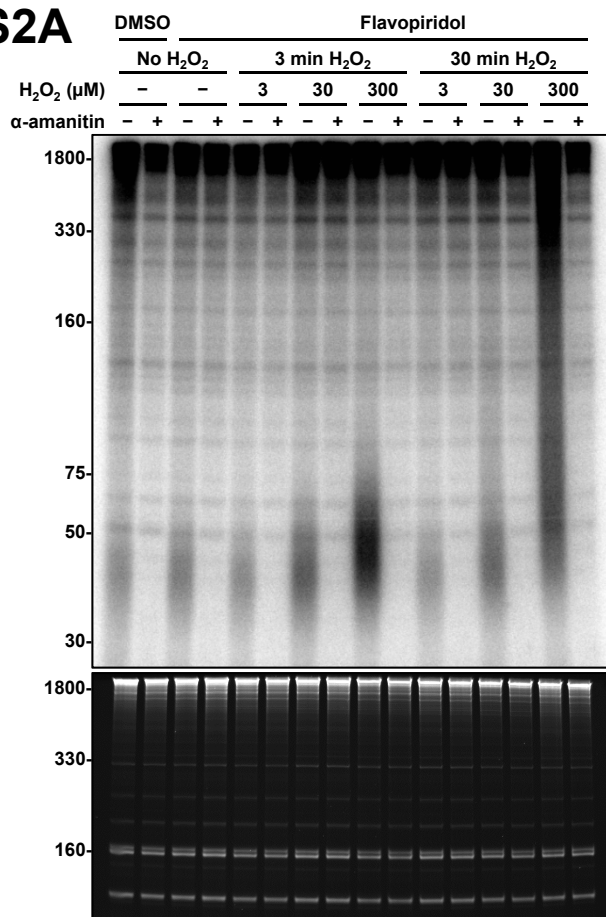

# S2B

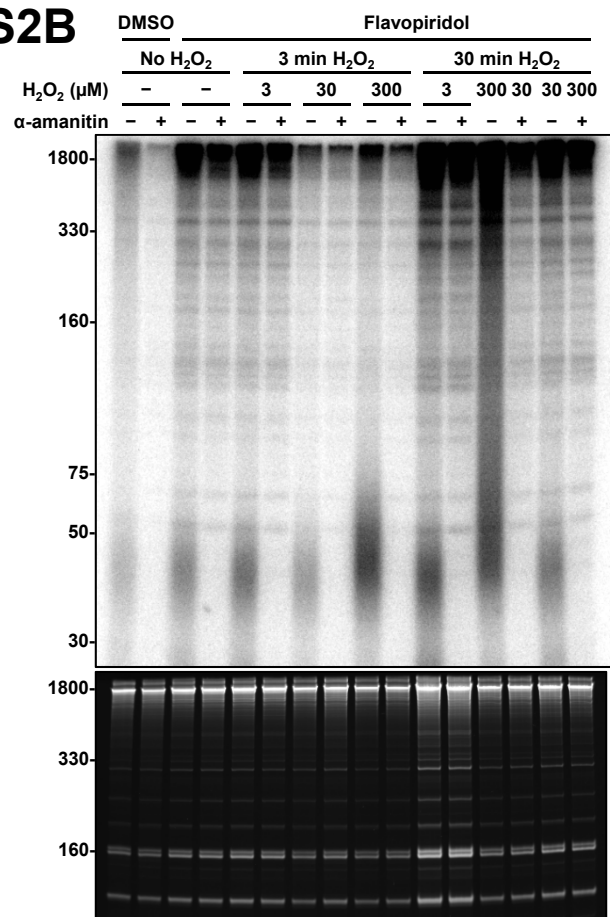

Lanes 13 and 15 were accidentally transposed

# S2C

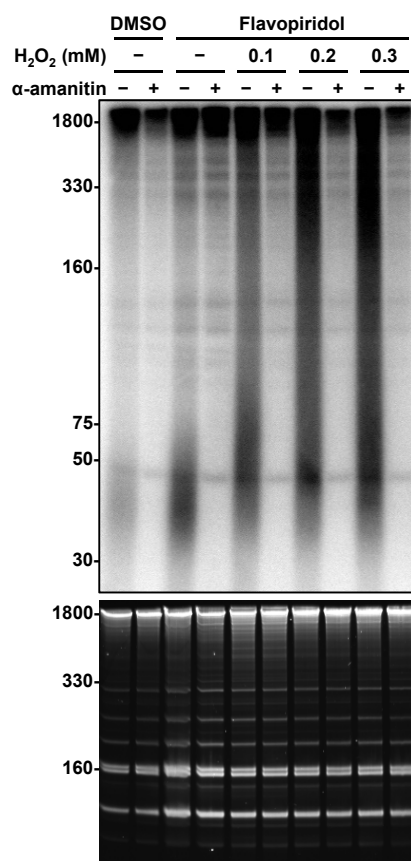

5B

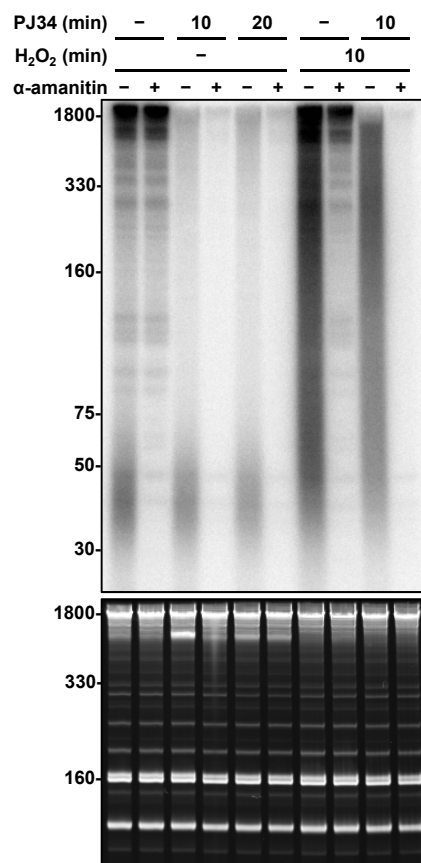

6B

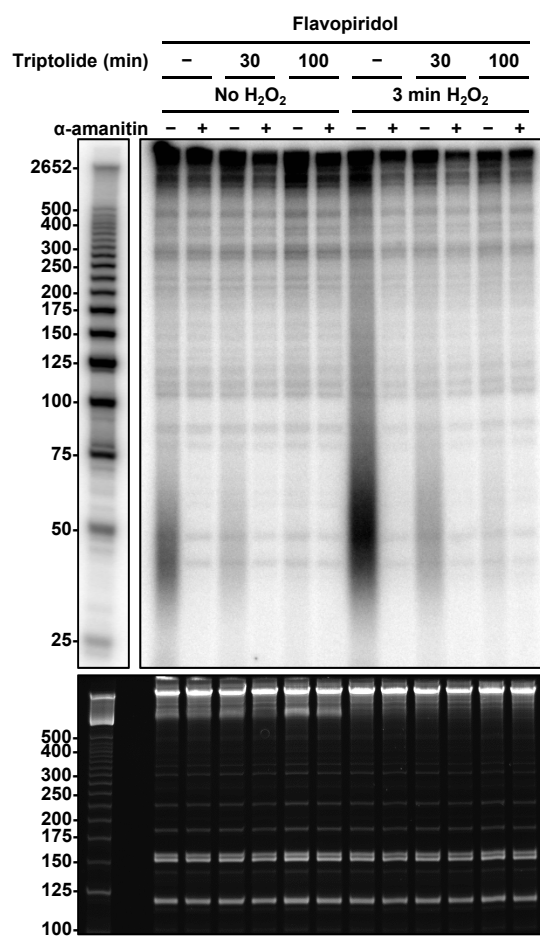

6C

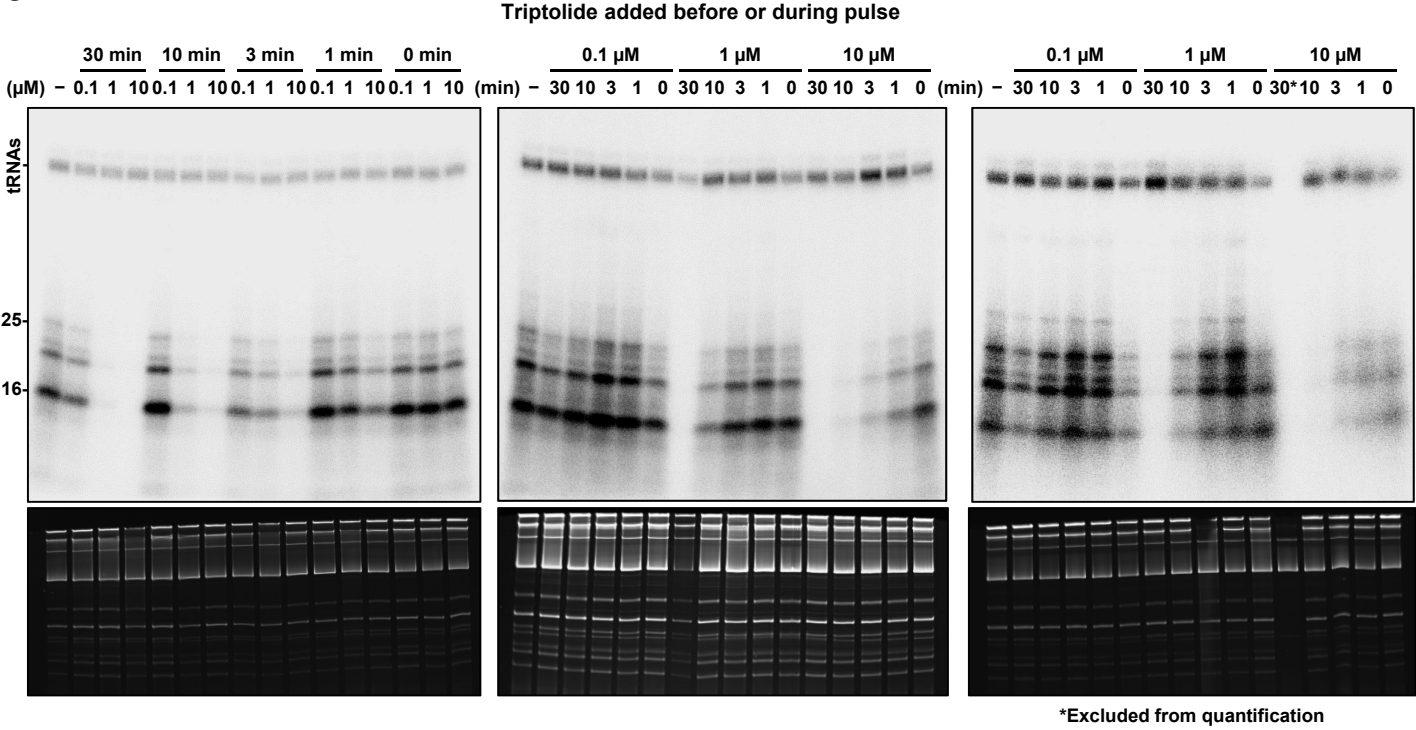

6D

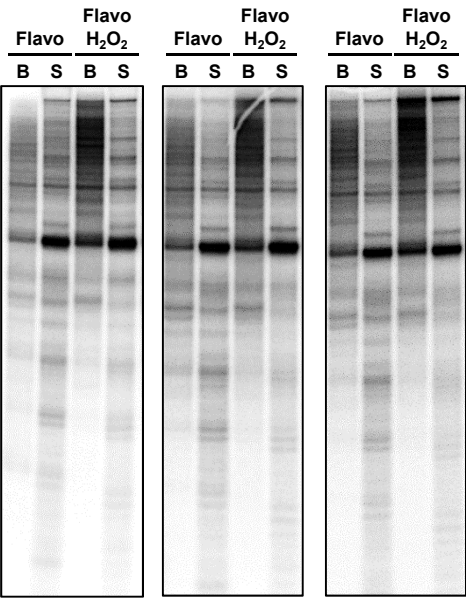

Supplement: gkx724_supp.zip [file gkx724_supp.zip › nar-01907-v-2017-File010.pdf]
